# Supplementary material for: Non-Coding RNAs Potentially Involved in Pyrethroid Resistance of Anopheles funestus Population in Western Kenya
Source: Research Square preprint supplement (doi:10.21203/rs.3.rs-3979432/v1), 2024-02-29
Supplement: Supplementary file 1 [file 215f24551344914e57c1e04c.docx]

**Table 3: List of the top non-coding RNA (ncRNA) involving pyrethroid resistance**

|  |  |  |  |  |  | Resistant vs Susceptible | | | Unexposed vs Susceptible | | |
| --- | --- | --- | --- | --- | --- | --- | --- | --- | --- | --- | --- |
| Gene  ID | start | end | width | gene_ebi_biotype | Gene name | baseMean | log2FoldChange | -log10(pValue) | baseMean | log2FoldChange | -log10(pValue) |
| AFUN017050 | 90765776 | 90766073 | 298 | SRP_RNA | Metazoa_SRP | 101122.5 | 7.2 | 215.1 | 100752.7 | 7.9 | 38.4 |
| AFUN017067 | 4215579 | 4215931 | 353 | RNase_P_RNA | RNaseP_nuc | 2731.0 | 4.9 | 66.3 | 2944.7 | 5.5 | 16.9 |
| AFUN017081 | 74472303 | 74472505 | 203 | snoRNA | U3_1 | 2548.6 | 4.6 | 48.1 | 1956.5 | 4.3 | 11.4 |
| AFUN017253 | 60827945 | 60828260 | 316 | ncRNA | Arthropod_7SK | 8119.6 | 6.5 | 164.3 | 7349.6 | 6.6 | 25.0 |
| AFUN017281 | 55964371 | 55965684 | 1314 | rRNA | LSU_rRNA_eukarya_3 | 12280.4 | 5.9 | 52.8 | 12836.9 | 5.6 | 11.0 |
| AFUN017331 | 50811594 | 50813597 | 2004 | rRNA | SSU_rRNA_eukarya_20 | 1469.9 | 2.9 | 47.4 | 1330.2 | 3.2 | 5.8 |
| AFUN017334 | 50799140 | 50800969 | 1830 | rRNA | LSU_rRNA_eukarya_13 | 27686.0 | 7.1 | 42.0 | 33976.1 | 7.0 | 35.2 |
| AFUN017368 | 50648232 | 50649006 | 775 | rRNA | SSU_rRNA_eukarya_46 | 2694.7 | 10.6 | 51.6 | 3091.2 | 11.1 | 24.8 |
| AFUN017395 | 50848871 | 50849574 | 704 | rRNA | LSU_rRNA_eukarya_29 | 24076.8 | 17.9 | 42.4 | 28207.8 | 18.3 | 14.8 |
| AFUN017396 | 50767394 | 50768099 | 706 | rRNA | LSU_rRNA_eukarya_30 | 32757.7 | 18.3 | 47.5 | 23629.1 | 18.0 | 14.1 |
| AFUN017547 | 48805965 | 48807956 | 1992 | rRNA | SSU_rRNA_eukarya_153 | 161.6 | 4.6 | 40.3 | 181.8 | 6.0 | 6.3 |
| AFUN017549 | 46029688 | 46031517 | 1830 | rRNA | LSU_rRNA_eukarya_58 | 1910.3 | 6.5 | 45.6 | 1738.1 | 7.9 | 25.6 |
| AFUN017554 | 49915486 | 49917315 | 1830 | rRNA | LSU_rRNA_eukarya_63 | 1832.1 | 9.2 | 49.2 | 2672.1 | 10.8 | 21.7 |
| AFUN017571 | 46354378 | 46355612 | 1235 | rRNA | SSU_rRNA_eukarya_164 | 15490.9 | 17.3 | 42.8 | 20445.0 | 17.8 | 14.2 |
| AFUN017615 | 46328435 | 46329209 | 775 | rRNA | SSU_rRNA_eukarya_191 | 10416.6 | 8.7 | 119.1 | 11009.1 | 8.5 | 35.3 |
| AFUN017624 | 46349571 | 46350344 | 774 | rRNA | SSU_rRNA_eukarya_200 | 13629.4 | 17.1 | 42.3 | 12032.4 | 17.0 | 13.0 |
| AFUN017713 | 45918446 | 45919151 | 706 | rRNA | LSU_rRNA_eukarya_155 | 790.5 | 4.5 | 53.3 | 632.8 | 3.9 | 7.0 |
| AFUN017730 | 48236642 | 48237337 | 696 | rRNA | LSU_rRNA_eukarya_170 | 2418.8 | 8.0 | 41.3 | 1872.3 | 7.7 | 29.0 |
| AFUN017738 | 47110641 | 47111184 | 544 | rRNA | LSU_rRNA_eukarya_178 | 748.8 | 7.9 | 91.9 | 1561.4 | 8.2 | 16.8 |
| AFUN017782 | 47823339 | 47823797 | 459 | rRNA | LSU_rRNA_eukarya_214 | 5160.7 | 8.2 | 41.0 | 5174.6 | 7.4 | 27.4 |
| AFUN018392 | 18931658 | 18931991 | 334 | RNase_MRP_RNA | RNase_MRP | 72032.4 | 6.7 | 160.6 | 71007.8 | 6.8 | 28.8 |
