# Supplementary material for: Non-Coding RNAs Potentially Involved in Pyrethroid Resistance of Anopheles funestus Population in Western Kenya
Source: Research Square preprint supplement (doi:10.21203/rs.3.rs-3979432/v1), 2024-02-29
Supplement: Supplementary file 2 [file a718e9b760054d5611e74e1b.xlsx]

## Sheet: 14176-3b
GeneID	start	end	width	Gene_Family_dz	targets_dz	gene_ebi_biotype	Gene name	Gene_Family_liverpool	description	Name	targets	Resistant vs Susceptible	baseMean	log2FoldChange	lfcSE	stat	pvalue	log10p	padj	log10p	5297n	Unexposed vs Susceptible	baseMean	log2FoldChange	lfcSE	stat	pvalue	log10p	padj	log10p	573n	Resistant vs Unexposed	baseMean	log2FoldChange	lfcSE	stat	pvalue	log10p	padj	log10p	11n	top_selection
AFUN000003	46588388	46589254	867	others	No	cDNA	mRpL17	others	39S ribosomal protein L17, mitochondrial [Source:UniProtKB/TrEMBL;Acc:A0A182R1G4]	mRpL17	No	AFUN000003	197.884	0.518375	0.190929	2.71502	0.00662718	2.17867	0.0190287	1.72059	x	AFUN000003	162.9	0.321704	0.713863	0.450653	0.65224	0.185593	0.977086	0.0100671		AFUN000003	187.205	-0.0525576	0.217903	-0.241197	0.809403	0.0918354	1	0
AFUN000006	46654755	46655541	787	others	No	cDNA	AFUN000006	others	unspecified product	NA	No	AFUN000006	71.8739	-0.498336	0.25805	-1.93116	0.0534628	1.27195	0.10855	0.96437		AFUN000006	48.4559	-0.60793	1.01838	-0.596956	0.550537	0.259214	0.95534	0.0198421		AFUN000006	61.2797	0.223103	0.349203	0.638892	0.522893	0.281587	1	0
AFUN000007	46656076	46666257	10182	others	No	cDNA	AFUN000007	others	mitogen-activated protein kinase kinase [Source:Projected from Anopheles gambiae (AGAP001867) VB Community Annotation]	NA	No	AFUN000007	2021.66	-0.0408074	0.192116	-0.21241	0.831787	0.0799878	0.885698	0.0527143		AFUN000007	1552.23	0.335036	0.562645	0.595465	0.551533	0.258429	0.955502	0.0197685		AFUN000007	1897.73	-0.113557	0.221326	-0.513076	0.607898	0.216169	1	0
AFUN000008	46667701	46681376	13676	others	No	cDNA	AFUN000008	others	solute carrier family 7 (L-type amino acid transporter), member [Source:Projected from Anopheles gambiae (AGAP001870) VB Community Annotation]	NA	No	AFUN000008	1002.77	-0.432558	0.256428	-1.68686	0.0916299	1.03796	0.168148	0.774307		AFUN000008	786.226	0.11837	0.594381	0.199149	0.842146	0.0746125	0.985497	0.0063449		AFUN000008	926.302	-0.223015	0.301676	-0.739252	0.459754	0.337474	1	0
AFUN000009	46692344	46699577	7234	others	No	cDNA	AFUN000009	others	Ro ribonucleoprotein autoantigen [Source:Projected from Anopheles gambiae (AGAP001871) VB Community Annotation]	NA	No	AFUN000009	1359.2	0.0363782	0.106584	0.341312	0.732869	0.134974	0.812227	0.0903225		AFUN000009	1122.19	0.262243	0.563145	0.465676	0.641448	0.192839	0.973159	0.0118162		AFUN000009	1279.86	-0.169551	0.137847	-1.22999	0.218702	0.660148	1	0
AFUN000011	46709736	46744124	34389	others	No	cDNA	AFUN000011	others	Ras-related protein Rap-1A [Source:Projected from Anopheles gambiae (AGAP001874) VB Community Annotation]	NA	No	AFUN000011	3257.79	-0.903823	0.123014	-7.34732	2.02216e-13	12.6942	5.03095e-12	11.2983	x	AFUN000011	2579.59	-0.714172	0.550212	-1.29799	0.19429	0.71155	0.769167	0.11398		AFUN000011	2763.93	-0.12972	0.159895	-0.811281	0.417205	0.379651	1	0
AFUN000012	46744835	46761401	16567	others	No	cDNA	AFUN000012	others	unspecified product	NA	No	AFUN000012	2287.7	0.686144	0.132894	5.16308	2.42917e-07	6.61454	2.27132e-06	5.64372	x	AFUN000012	1776.16	0.708107	0.582041	1.21659	0.223759	0.65022	0.796286	0.0989306		AFUN000012	2213.03	-0.0182147	0.210269	-0.0866254	0.930969	0.0310646	1	0
AFUN000013	46761771	46762688	918	others	No	cDNA	AFUN000013	others	peptide alpha-N-acetyltransferase [Source:Projected from Anopheles gambiae (AGAP001878) VB Community Annotation]	NA	No	AFUN000013	87.7543	0.622813	0.306858	2.02964	0.0423929	1.37271	0.0897728	1.04686		AFUN000013	51.4724	0.48637	0.998369	0.487165	0.626142	0.203327	0.970912	0.01282		AFUN000013	80.7263	0.438632	0.37298	1.17602	0.239587	0.620537	1	0
AFUN000014	46762693	46765016	2324	others	No	cDNA	AFUN000014	others	pre-mRNA-splicing factor CLF1 [Source:Projected from Anopheles gambiae (AGAP001879) VB Community Annotation]	NA	No	AFUN000014	248.082	-0.612879	0.169595	-3.61377	0.000301772	3.52032	0.00133178	2.87557	x	AFUN000014	161.251	-0.910354	0.720569	-1.26338	0.206452	0.685181	0.780829	0.107444		AFUN000014	205.31	0.371273	0.232294	1.59829	0.109979	0.958691	1	0
AFUN000015	46771791	46773671	1881	others	No	cDNA	AFUN000015	others	bZIP factor, other [Source:Projected from Anopheles gambiae (AGAP001880) VB Community Annotation]	NA	No	AFUN000015	3.57695	1.4988	1.33737	1.12071	0.262412	0.581017	0.383231	0.41654		AFUN000015	2.68141	1.20988	3.9362	0.307372	0.75856	0.12001	0.985365	0.00640266		AFUN000015	3.54405	0.0442575	1.706	0.0259423	0.979303	0.00908274	1	0
AFUN000018	46807398	46816232	8835	others	No	cDNA	AFUN000018	others	unspecified product	NA	No	AFUN000018	503.482	0.188067	0.186519	1.0083	0.313313	0.504022	0.437842	0.358683		AFUN000018	362.229	0.246084	0.620044	0.396882	0.691454	0.160237	0.982577	0.00763328		AFUN000018	465.668	0.0816844	0.222014	0.367925	0.712929	0.146954	1	0
AFUN000019	46818925	46823637	4713	others	No	cDNA	AFUN000019	others	ELAV (embryonic lethal, abnormal vision Drosophila)-like [Source:Projected from Anopheles gambiae (AGAP001883) VB Community Annotation]	NA	No	AFUN000019	1216.7	-0.484405	0.241322	-2.0073	0.0447182	1.34952	0.0939641	1.02704		AFUN000019	794.328	-0.574823	0.571972	-1.00498	0.314905	0.501821	0.868687	0.0611365		AFUN000019	1039.7	0.275544	0.277722	0.992157	0.321121	0.493331	1	0
AFUN000020	46843678	46847327	3650	others	No	cDNA	AFUN000020	others	fumarate hydratase, class II [Source:Projected from Anopheles gambiae (AGAP001884) VB Community Annotation]	NA	No	AFUN000020	1255.33	-0.270069	0.376932	-0.716493	0.473687	0.324508	0.593935	0.226261		AFUN000020	1158.9	-0.845837	0.560394	-1.50936	0.131207	0.882044	0.681324	0.166646		AFUN000020	1052.29	-0.0176378	0.383478	-0.0459942	0.963315	0.0162317	1	0
AFUN000021	46848417	46849739	1323	others	No	cDNA	AFUN000021	others	WD repeat-containing protein [Source:Projected from Anopheles gambiae (AGAP001885) VB Community Annotation]	NA	No	AFUN000021	100.158	1.49788	0.322042	4.6512	3.30006e-06	5.48148	2.37556e-05	4.62423	x	AFUN000021	55.3819	0.370649	0.962662	0.385025	0.700219	0.154766	0.982577	0.00763328		AFUN000021	90.9065	0.713819	0.355004	2.01073	0.0443537	1.35307	1	0
AFUN000022	46849759	46865867	16109	others	No	cDNA	AFUN000022	others	WH2 domain-containing protein [Source:UniProtKB/TrEMBL;Acc:A0A182R1I3]	NA	No	AFUN000022	1432.34	0.754513	0.170065	4.43663	9.13798e-06	5.03915	5.97786e-05	4.22345	x	AFUN000022	1185.41	1.05889	0.60625	1.74661	0.0807044	1.0931	0.565605	0.247487		AFUN000022	1433.9	-0.169228	0.254298	-0.665469	0.505751	0.296064	1	0
AFUN000027	46902303	46903777	1475	others	No	cDNA	AFUN000027	others	unspecified product	NA	No	AFUN000027	174.052	0.776539	0.272245	2.85236	0.00433959	2.36255	0.0133654	1.87402	x	AFUN000027	99.303	0.404693	0.823003	0.491727	0.622913	0.205573	0.969848	0.0132962		AFUN000027	158.783	0.516904	0.34316	1.50631	0.131989	0.879464	1	0
AFUN000028	46904208	46907436	3229	others	No	cDNA	AFUN000028	others	centromere protein J [Source:Projected from Anopheles gambiae (AGAP001897) VB Community Annotation]	NA	No	AFUN000028	234.212	-0.985085	0.272486	-3.61518	0.000300138	3.52268	0.00132549	2.87762	x	AFUN000028	144.366	-0.968022	0.733628	-1.3195	0.187002	0.728154	0.762947	0.117506		AFUN000028	192.708	0.30782	0.322277	0.955144	0.339505	0.469154	1	0
AFUN000029	46907458	46908730	1273	others	No	cDNA	mRpL44	others	39S ribosomal protein L44, mitochondrial	mRpL44	No	AFUN000029	268.591	0.833624	0.184245	4.52453	6.05291e-06	5.21804	4.1114e-05	4.38601	x	AFUN000029	171.871	0.68662	0.722245	0.950674	0.34177	0.466266	0.881667	0.0546952		AFUN000029	252.584	0.29258	0.244959	1.1944	0.23232	0.633913	1	0
AFUN000030	46909224	46917424	8201	others	No	cDNA	AFUN000030	others	fatty acid synthase, animal type [Source:Projected from Anopheles gambiae (AGAP001899) VB Community Annotation]	NA	No	AFUN000030	4270.33	-0.502529	0.249501	-2.01414	0.0439948	1.3566	0.0926271	1.03326		AFUN000030	3195.35	-0.0289499	0.606744	-0.0477135	0.961945	0.0168499	0.995906	0.00178163		AFUN000030	3873.66	-0.136893	0.326609	-0.419135	0.675117	0.170621	1	0
AFUN000031	46918720	46920769	2050	others	No	cDNA	AFUN000031	others	de-etiolated-1 [Source:Projected from Anopheles gambiae (AGAP001900) VB Community Annotation]	NA	No	AFUN000031	176.604	0.782471	0.19667	3.97861	6.932e-05	4.15914	0.000362001	3.44129	x	AFUN000031	100.736	0.65008	0.81352	0.799095	0.424235	0.372393	0.922336	0.0351109		AFUN000031	163.433	0.451061	0.237197	1.90163	0.0572199	1.24245	1	0
AFUN000032	46920837	46924411	3575	others	No	cDNA	AFUN000032	others	DNA helicase MCM9 [Source:Projected from Anopheles gambiae (AGAP001901) VB Community Annotation]	NA	No	AFUN000032	218.922	0.363496	0.245096	1.48308	0.138054	0.859952	0.23322	0.632233		AFUN000032	119.229	-0.286512	0.767552	-0.37328	0.70894	0.14939	0.983212	0.00735286		AFUN000032	189.964	0.717334	0.304434	2.35629	0.0184585	1.7338	1	0
AFUN000033	46924402	46928238	3837	others	No	cDNA	Rheb	others	GTP-binding protein Rheb [Source:UniProtKB/TrEMBL;Acc:A0A182R1J4]	Rheb	No	AFUN000033	1797.78	-0.431105	0.149591	-2.88189	0.00395293	2.40308	0.0123655	1.90779	x	AFUN000033	1554.02	-0.317782	0.557088	-0.570433	0.568384	0.245358	0.961835	0.0168995		AFUN000033	1603.89	-0.210975	0.183883	-1.14734	0.251243	0.599907	1	0
AFUN000035	46944661	46953091	8431	others	No	cDNA	AFUN000035	others	PH domain-containing protein [Source:UniProtKB/TrEMBL;Acc:A0A182R1J7]	NA	No	AFUN000035	1774.37	-0.482129	0.143174	-3.36744	0.000758691	3.11994	0.00294949	2.53025	x	AFUN000035	1400.28	-0.333209	0.566371	-0.588322	0.556316	0.254678	0.957855	0.0187001		AFUN000035	1569.34	-0.0939322	0.190545	-0.492966	0.622037	0.206184	1	0
AFUN000036	46953640	46958152	4513	others	No	cDNA	AFUN000036	others	glyceronephosphate O-acyltransferase [Source:Projected from Anopheles gambiae (AGAP001908) VB Community Annotation]	NA	No	AFUN000036	303.516	0.502477	0.21991	2.28492	0.0223175	1.65135	0.0529538	1.2761		AFUN000036	249.393	0.434934	0.652827	0.666231	0.505263	0.296482	0.944987	0.024574		AFUN000036	289.907	-0.0763333	0.254927	-0.299432	0.76461	0.11656	1	0
AFUN000037	46958624	46961562	2939	others	No	cDNA	AFUN000037	others	unspecified product	NA	No	AFUN000037	224.791	-0.464599	0.228435	-2.03384	0.041968	1.37708	0.0890652	1.05029		AFUN000037	131.624	-0.201206	0.744908	-0.270109	0.787076	0.103983	0.985365	0.00640266		AFUN000037	197.13	0.297528	0.219092	1.35801	0.174462	0.7583	1	0
AFUN000038	46961574	46963109	1536	others	No	cDNA	RpS3	others	40S ribosomal protein S3 [Source:UniProtKB/TrEMBL;Acc:A0A182R1K0]	RpS3	No	AFUN000038	6462.32	-0.624659	0.130409	-4.78998	1.66797e-06	5.77781	1.28942e-05	4.88961	x	AFUN000038	4995.06	-0.366417	0.53912	-0.679657	0.496721	0.303887	0.941598	0.0261347		AFUN000038	5687.57	-0.112311	0.150066	-0.748411	0.454212	0.342741	1	0
AFUN000039	46963624	46964734	1111	others	No	cDNA	RpL6	others	60S ribosomal protein L6 [Source:UniProtKB/TrEMBL;Acc:A0A182R1K1]	RpL6	No	AFUN000039	8690.12	1.3174	0.171133	7.69809	1.38113e-14	13.8598	4.11855e-13	12.3853	x	AFUN000039	6614.25	1.17213	0.547733	2.13996	0.032358	1.49002	0.331945	0.478933		AFUN000039	8631.19	0.0419447	0.212809	0.1971	0.843749	0.0737866	1	0
AFUN000040	46964821	46966257	1437	OPs	Yes	cDNA	Or8	others	Odorant receptor [Source:UniProtKB/TrEMBL;Acc:A0A182R1K2]	Or8	No	AFUN000040	2.23172	-1.94045	1.69859	-1.14239	0.253293	0.596378	0.37325	0.428001		AFUN000040	3.21122	-2.61299	3.29978	-0.791868	0.428438	0.368112	0.923499	0.0345635		AFUN000040	1.25748	-0.432626	2.23428	-0.193631	0.846465	0.072391	1	0
AFUN000041	46968104	46973447	5344	others	No	cDNA	AFUN000041	others	histamine-gated chloride channel [Source:Projected from Anopheles gambiae (AGAP001913) VB Community Annotation]	NA	No	AFUN000041	153.931	-0.600765	0.313245	-1.91788	0.0551267	1.25864	0.111291	0.95354		AFUN000041	117.277	-0.453459	0.830578	-0.545956	0.585096	0.232773	0.963704	0.0160563		AFUN000041	134.205	-0.0390909	0.428352	-0.091259	0.927287	0.0327859	1	0
AFUN000042	46973952	46976024	2073	others	No	cDNA	AFUN000042	others	cell division cycle protein [Source:Projected from Anopheles gambiae (AGAP001914) VB Community Annotation]	NA	No	AFUN000042	568.797	-1.54012	0.127753	-12.0554	1.81542e-33	32.741	3.08936e-31	30.5101	x	AFUN000042	421.907	-1.70607	0.60783	-2.80682	0.00500326	2.30075	0.0878449	1.05628		AFUN000042	430.752	0.151718	0.172601	0.879008	0.379397	0.420906	1	0
AFUN000043	46977007	46978518	1512	others	No	cDNA	Gr24	others	gustatory receptor	Gr24	No	AFUN000043	4.8824	1.19984	0.824176	1.4558	0.145447	0.837295	0.2425	0.615288		AFUN000043	2.0532	0.726852	4.37845	0.166007	0.868152	0.0614044	1	0		AFUN000043	4.39411	0.847908	1.13224	0.748879	0.45393	0.343011	1	0
AFUN000044	46988745	47041586	52842	others	No	cDNA	AFUN000044	others	unspecified product	NA	No	AFUN000044	832.972	-0.145422	0.156968	-0.926443	0.354216	0.450732	0.478094	0.320487		AFUN000044	755.4	-0.0441238	0.582987	-0.0756856	0.939669	0.027025	0.994196	0.00252795		AFUN000044	769.429	-0.273426	0.190104	-1.4383	0.15035	0.822896	1	0
AFUN000046	47047490	47049438	1949	others	No	cDNA	AFUN000046	others	protein disulfide-isomerase A6 [Source:Projected from Anopheles gambiae (AGAP001919) VB Community Annotation]	NA	No	AFUN000046	857.793	-0.330883	0.196026	-1.68795	0.0914201	1.03896	0.16786	0.775053		AFUN000046	585.551	-0.165145	0.605945	-0.272541	0.785206	0.105017	0.985365	0.00640266		AFUN000046	762.473	0.110039	0.238438	0.461502	0.644438	0.190819	1	0
AFUN000047	47054434	47057528	3095	others	No	cDNA	AFUN000047	others	solute carrier family 38 (sodium-coupled neutral amino acid transporter) [Source:Projected from Anopheles gambiae (AGAP001923) VB Community Annotation]	NA	No	AFUN000047	259.905	-0.107455	0.192167	-0.559172	0.576044	0.239544	0.681819	0.166331		AFUN000047	181.39	0.207768	0.694381	0.299213	0.764778	0.116465	0.985365	0.00640266		AFUN000047	238.831	0.044528	0.204081	0.218188	0.827282	0.0823462	1	0
AFUN000048	47105244	47110865	5622	others	No	cDNA	AFUN000048	others	unspecified product	NA	No	AFUN000048	2.46277	-2.59688	1.37383	-1.89025	0.0587245	1.23118	0.117164	0.931204		AFUN000048	0.241337	-1.75094	5.94809	-0.294371	0.768474	0.114371	1	0		AFUN000048	1.93443	1.71967	2.23306	0.770097	0.441242	0.355323	1	0
AFUN000052	79285109	79292260	7152	others	No	cDNA	AFUN000052	others	myosin III [Source:Projected from Anopheles gambiae (AGAP009730) VB Community Annotation]	NA	No	AFUN000052	582.165	0.77262	0.408702	1.89043	0.058701	1.23135	0.117154	0.931242		AFUN000052	566.613	1.46828	0.852751	1.72182	0.0851023	1.07006	0.581697	0.235303		AFUN000052	617.892	-0.468814	0.6149	-0.762423	0.445807	0.350853	1	0
AFUN000053	79292297	79294521	2225	others	No	cDNA	AFUN000053	others	cardioacceleratory peptide [Source:Projected from Anopheles gambiae (AGAP009729) VB Community Annotation]	NA	No	AFUN000053	15.0733	-2.32979	0.626515	-3.71865	0.000200292	3.69834	0.000923593	3.03452	x	AFUN000053	13.6481	-1.19554	1.73228	-0.690154	0.490097	0.309718	0.941131	0.0263497		AFUN000053	12.0735	-0.920021	0.869634	-1.05794	0.290083	0.537478	1	0
AFUN000054	79297323	79298874	1552	others	No	cDNA	AFUN000054	others	ficolin [Source:Projected from Anopheles gambiae (AGAP009728) VB Community Annotation]	NA	No	AFUN000054	0.458895	-2.77195	3.39249	-0.817084	0.41388	0.383125	1	0		AFUN000054	0.482674	-2.75089	5.85998	-0.469437	0.638757	0.194664	1	0		AFUN000054	0.204963	0	4.08048	0	1	0	1	0
AFUN000055	79299743	79331569	31827	others	No	cDNA	AFUN000055	others	RhoGAP92B [Source:Projected from Anopheles gambiae (AGAP009727) VB Community Annotation]	NA	No	AFUN000055	3346.15	-0.520754	0.189641	-2.746	0.00603264	2.21949	0.0175956	1.7546	x	AFUN000055	2440.22	-0.491099	0.544746	-0.901519	0.367312	0.434965	0.892373	0.0494538		AFUN000055	2897.81	0.066063	0.222508	0.296902	0.766542	0.115464	1	0
AFUN000056	54587278	54588515	1238	others	No	cDNA	AFUN000056	others	unspecified product	NA	No	AFUN000056	0.0832134	-0.519413	3.53382	-0.146983	0.883145	0.0539679	1	0		AFUN000056	0	NA	NA	NA	NA	#VALUE!	1	0		AFUN000056	0.0683209	0	4.08048	0	1	0	1	0
AFUN000057	58804384	58806507	2124	others	No	cDNA	AFUN000057	others	Class B Scavenger Receptor (CD36 domain). [Source:Projected from Anopheles gambiae (AGAP010132) VB Community Annotation]	NA	No	AFUN000057	31.2588	1.35111	0.567118	2.38241	0.0171997	1.76448	0.0426253	1.37033	x	AFUN000057	28.3722	0.741574	1.25083	0.592866	0.553271	0.257062	0.955725	0.0196669		AFUN000057	31.1211	-0.118836	0.598637	-0.198511	0.842645	0.0743553	1	0
AFUN000058	58811349	58820009	8661	others	No	cDNA	AFUN000058	others	ornithine decarboxylase antizyme [Source:Projected from Anopheles gambiae (AGAP010131) VB Community Annotation]	NA	No	AFUN000058	17911	-0.729642	0.186574	-3.91074	9.2012e-05	4.03616	0.000466011	3.3316	x	AFUN000058	15124.8	-0.582553	0.537635	-1.08355	0.278565	0.555073	0.848334	0.0714331		AFUN000058	15472.7	-0.198091	0.224546	-0.882186	0.377676	0.42288	1	0
AFUN000060	58837908	58842809	4902	others	No	cDNA	AFUN000060	others	Protein kinase domain-containing protein [Source:UniProtKB/TrEMBL;Acc:A0A182R1M2]	NA	No	AFUN000060	37.1272	-0.680391	0.442609	-1.53723	0.124237	0.905749	0.214653	0.668264		AFUN000060	22.3902	-1.4299	1.40244	-1.01958	0.307925	0.511554	0.864139	0.0634165		AFUN000060	29.331	0.763166	0.622909	1.22517	0.220513	0.656566	1	0
AFUN000061	58848912	58850166	1255	others	No	cDNA	AFUN000061	others	unspecified product	NA	No	AFUN000061	363.032	-5.00364	0.921172	-5.43182	5.57832e-08	7.2535	5.83574e-07	6.2339	x	AFUN000061	684.278	-5.66192	0.648378	-8.73243	2.49257e-18	17.6034	5.04788e-16	15.2969	x	AFUN000061	72.751	-0.654063	0.675619	-0.968094	0.332997	0.477559	1	0
AFUN000062	58855557	58856755	1199	others	No	cDNA	AFUN000062	others	unspecified product	NA	No	AFUN000062	25.8787	-0.304063	0.694495	-0.437818	0.661518	0.179458	0.755792	0.121598		AFUN000062	13.9633	-0.92404	1.70713	-0.541283	0.588313	0.230392	0.963704	0.0160563		AFUN000062	21.4032	0.800301	0.897737	0.891465	0.37268	0.428664	1	0
AFUN000070	58870712	58871577	866	others	No	cDNA	AFUN000070	others	nonmuscle myosin heavy chain-A [Source:Projected from Anopheles gambiae (AGAP010094) VB Community Annotation]	NA	No	AFUN000070	0.24964	-1.90671	3.44156	-0.554024	0.579563	0.2369	1	0		AFUN000070	0	NA	NA	NA	NA	#VALUE!	1	0		AFUN000070	0.204963	0	4.08048	0	1	0	1	0
AFUN000071	58872764	58880322	7559	others	No	cDNA	AFUN000071	others	Glycosyltransferase family 92 protein [Source:UniProtKB/TrEMBL;Acc:A0A182R1N3]	NA	No	AFUN000071	171.435	-0.394772	0.300865	-1.31213	0.189478	0.722442	0.298851	0.524545		AFUN000071	141.286	0.405657	0.844893	0.480128	0.631136	0.199877	0.971877	0.0123886		AFUN000071	163.492	-0.357559	0.43393	-0.824002	0.409938	0.387282	1	0
AFUN000077	59108934	59110752	1819	others	No	cDNA	AFUN000077	others	short wavelength sensitive opsin [Source:Projected from Anopheles gambiae (AGAP010089) VB Community Annotation]	NA	No	AFUN000077	3002.06	-0.693091	0.18899	-3.66734	0.000245085	3.61068	0.0011057	2.95636	x	AFUN000077	2641.41	-0.457028	0.581961	-0.785325	0.432263	0.364252	0.923499	0.0345635		AFUN000077	2638.81	-0.293127	0.263922	-1.11066	0.266716	0.573951	1	0
AFUN000078	59140103	59152783	12681	others	No	cDNA	AFUN000078	others	ubiquitin carboxyl-terminal hydrolase 9/24 [Source:Projected from Anopheles gambiae (AGAP010088) VB Community Annotation]	NA	No	AFUN000078	1714.75	0.145467	0.101883	1.42779	0.153353	0.814308	0.252743	0.597321		AFUN000078	1294.98	0.147713	0.57106	0.258664	0.795894	0.0991447	0.985365	0.00640266		AFUN000078	1581.35	0.0251401	0.159767	0.157355	0.874965	0.0580093	1	0
AFUN000079	59153380	59155840	2461	others	No	cDNA	AFUN000079	others	MADF domain-containing protein [Source:UniProtKB/TrEMBL;Acc:A0A182R1P1]	NA	No	AFUN000079	164.031	-0.666071	0.27427	-2.42852	0.0151605	1.81929	0.0383914	1.41577	x	AFUN000079	119.986	-0.373894	0.824098	-0.453701	0.650044	0.187057	0.976646	0.0102627		AFUN000079	143.84	-0.0391988	0.386184	-0.101503	0.919151	0.036613	1	0
AFUN000080	59156526	59165401	8876	others	No	cDNA	AFUN000080	others	phosphatidylinositol-binding clathrin assembly protein [Source:Projected from Anopheles gambiae (AGAP010087) VB Community Annotation]	NA	No	AFUN000080	2308.03	0.156853	0.0880539	1.78133	0.0748589	1.12576	0.143113	0.84432		AFUN000080	1852.16	0.167638	0.548536	0.30561	0.759902	0.119243	0.985365	0.00640266		AFUN000080	2147.24	-0.0631996	0.106541	-0.593196	0.55305	0.257235	1	0
AFUN000081	59166285	59169498	3214	others	No	cDNA	AFUN000081	others	arginyl-tRNA synthetase [Source:Projected from Anopheles gambiae (AGAP010086) VB Community Annotation]	NA	No	AFUN000081	168.155	-0.0626702	0.219676	-0.285285	0.775426	0.11046	0.841667	0.0748598		AFUN000081	119.933	0.332301	0.792902	0.419094	0.675147	0.170602	0.982503	0.00766594		AFUN000081	156.479	-0.000664528	0.280221	-0.00237144	0.998108	0.000822523	1	0
AFUN000082	59170035	59178548	8514	IMPs	Yes	cDNA	AFUN000082	others	JAKSTAT pathway signalling Domeless [Source:Projected from Anopheles gambiae (AGAP029053) UniProtKB/TrEMBL;Acc:A0A1Y9IHQ6]	NA	No	AFUN000082	2424.25	-0.51827	0.147767	-3.50735	0.0004526	3.34429	0.00189394	2.72263	x	AFUN000082	1786.2	-0.162042	0.551473	-0.293834	0.768885	0.114139	0.985365	0.00640266		AFUN000082	2169.05	-0.0743169	0.148123	-0.501723	0.615863	0.210516	1	0
AFUN000083	59178677	59180944	2268	others	No	cDNA	AFUN000083	others	unspecified product	NA	No	AFUN000083	91.0808	-1.2639	0.36694	-3.44442	0.000572277	3.24239	0.00231138	2.63613	x	AFUN000083	74.9193	-0.783236	0.999268	-0.78381	0.433151	0.36336	0.923499	0.0345635		AFUN000083	76.8433	-0.327058	0.552659	-0.59179	0.553991	0.256497	1	0
AFUN000085	59186926	59195415	8490	others	No	cDNA	AFUN000085	others	Polypeptide N-acetylgalactosaminyltransferase [Source:Projected from Anopheles gambiae (AGAP029599) UniProtKB/TrEMBL;Acc:A0A453Z0V7]	NA	No	AFUN000085	254.198	0.273816	0.253064	1.082	0.279252	0.554004	0.40186	0.395926		AFUN000085	199.522	0.41861	0.681221	0.6145	0.538885	0.268504	0.954252	0.0203369		AFUN000085	240.939	-0.0679128	0.299112	-0.227048	0.820386	0.0859816	1	0
AFUN000087	59206043	59211079	5037	others	No	cDNA	AFUN000087	others	Homer homolog [Source:Projected from Anopheles gambiae (AGAP010076) VB Community Annotation]	NA	No	AFUN000087	1194.92	0.0364298	0.162323	0.224428	0.822424	0.0849042	0.87885	0.0560854		AFUN000087	909.918	0.284575	0.57963	0.490959	0.623455	0.205195	0.969982	0.0132364		AFUN000087	1116.04	-0.0595173	0.201516	-0.295348	0.767728	0.114793	1	0
AFUN000088	59211374	59213885	2512	others	No	cDNA	AFUN000088	others	U4/U6.U5 tri-snRNP-associated protein [Source:Projected from Anopheles gambiae (AGAP010075) VB Community Annotation]	NA	No	AFUN000088	798.054	0.215496	0.178713	1.20582	0.227887	0.64228	0.343883	0.463589		AFUN000088	614.663	0.589842	0.586692	1.00537	0.314719	0.502077	0.868672	0.0611441		AFUN000088	764.648	-0.102585	0.196286	-0.522633	0.60123	0.22096	1	0
AFUN000089	59214402	59215853	1452	others	No	cDNA	AFUN000089	others	peroxin [Source:Projected from Anopheles gambiae (AGAP010074) VB Community Annotation]	NA	No	AFUN000089	287.066	0.297685	0.232443	1.28068	0.200307	0.698304	0.312037	0.505794		AFUN000089	217.338	0.110381	0.669528	0.164863	0.869051	0.0609545	0.988212	0.00514969		AFUN000089	264.012	0.0810774	0.276378	0.293357	0.769249	0.113933	1	0
AFUN000090	59216295	59217946	1652	others	No	cDNA	AFUN000090	others	type II pantothenate kinase [Source:Projected from Anopheles gambiae (AGAP010073) VB Community Annotation]	NA	No	AFUN000090	147.419	0.684093	0.188228	3.63439	0.000278639	3.55496	0.00124085	2.90628	x	AFUN000090	120.989	0.94793	0.795832	1.19112	0.233607	0.631514	0.809256	0.0919142		AFUN000090	146.339	-0.137578	0.269737	-0.510047	0.610019	0.214657	1	0
AFUN000091	59218047	59218541	495	others	No	cDNA	AFUN000091	others	Iron--sulfur cluster insertion protein erpA [Source:Projected from Anopheles gambiae (AGAP010072) VB Community Annotation]	NA	No	AFUN000091	59.1138	0.323489	0.383653	0.84318	0.399128	0.398888	0.523615	0.280988		AFUN000091	57.4988	-0.227295	0.948881	-0.23954	0.810687	0.091147	0.985365	0.00640266		AFUN000091	53.8572	-0.158833	0.355998	-0.446163	0.655479	0.183441	1	0
AFUN000092	59218649	59222166	3518	others	No	cDNA	AFUN000092	others	acyl-CoA synthetase [Source:Projected from Anopheles gambiae (AGAP010071) VB Community Annotation]	NA	No	AFUN000092	104.845	0.803419	0.221443	3.62811	0.000285502	3.54439	0.00126787	2.89693	x	AFUN000092	98.2669	0.941252	0.820989	1.14649	0.251594	0.599299	0.822968	0.0846171		AFUN000092	106.595	-0.303156	0.272032	-1.11441	0.265102	0.576587	1	0
AFUN000093	59223895	59239458	15564	others	No	cDNA	AFUN000093	others	Aldo_ket_red domain-containing protein [Source:UniProtKB/TrEMBL;Acc:A0A182R1Q4]	NA	No	AFUN000093	1368.15	-0.703961	0.195424	-3.60222	0.000315512	3.50098	0.00138288	2.85921	x	AFUN000093	1100.92	-0.724421	0.601472	-1.20441	0.22843	0.641247	0.801946	0.0958547		AFUN000093	1160.27	-0.053558	0.273788	-0.195618	0.844909	0.0731901	1	0
AFUN000095	59242618	59243487	870	others	No	cDNA	AFUN000095	others	DNA-directed RNA polymerases I, II, and III subunit RPABC1 [Source:Projected from Anopheles gambiae (AGAP010064) VB Community Annotation]	NA	No	AFUN000095	297.435	-0.116621	0.150239	-0.776237	0.437609	0.358914	0.561553	0.25061		AFUN000095	209.414	-0.345917	0.67656	-0.511288	0.60915	0.215276	0.969848	0.0132962		AFUN000095	260.749	0.219345	0.197846	1.10867	0.267575	0.572555	1	0
AFUN000096	59244212	59245750	1539	others	No	cDNA	AFUN000096	others	unspecified product	NA	No	AFUN000096	31.506	1.03255	0.456804	2.26039	0.0237973	1.62347	0.055945	1.25224		AFUN000096	27.2842	1.50172	1.28268	1.17076	0.241694	0.616735	0.81905	0.0866897		AFUN000096	32.6466	-0.258233	0.522156	-0.494552	0.620917	0.206967	1	0
AFUN000097	59247359	59264935	17577	others	No	cDNA	AFUN000097	others	zinc finger, SWIM-type containing [Source:Projected from Anopheles gambiae (AGAP010062) VB Community Annotation]	NA	No	AFUN000097	2058	0.627578	0.13819	4.54142	5.58765e-06	5.25277	3.82798e-05	4.41703	x	AFUN000097	1566.91	0.780607	0.576318	1.35447	0.175586	0.755511	0.750793	0.12448		AFUN000097	1994.9	-0.0208952	0.197322	-0.105894	0.915666	0.0382627	1	0
AFUN000098	59265498	59271774	6277	others	No	cDNA	AFUN000098	others	RIC1 domain-containing protein [Source:UniProtKB/TrEMBL;Acc:A0A182R1Q9]	NA	No	AFUN000098	434.448	0.349832	0.186532	1.87545	0.0607314	1.21659	0.120387	0.919419		AFUN000098	303.193	0.0283373	0.650313	0.0435748	0.965243	0.0153632	0.996107	0.0016942		AFUN000098	393.513	0.243747	0.245342	0.993499	0.320467	0.494217	1	0
AFUN000099	59271794	59273325	1532	others	No	cDNA	AFUN000099	others	DNA repair protein Rad62 [Source:Projected from Anopheles gambiae (AGAP010060) VB Community Annotation]	NA	No	AFUN000099	76.4078	1.88793	0.275765	6.84616	7.58607e-12	11.12	1.45159e-10	9.83816	x	AFUN000099	68.0268	1.95956	0.976612	2.00648	0.0448046	1.34868	0.403585	0.394065		AFUN000099	81.4207	-0.202864	0.374264	-0.542034	0.587795	0.230774	1	0
AFUN000100	59465034	59466851	1818	others	No	cDNA	AFUN000100	others	Neur_chan_LBD domain-containing protein [Source:UniProtKB/TrEMBL;Acc:A0A182R1R1]	NA	No	AFUN000100	38.5553	1.66061	0.737099	2.2529	0.0242656	1.61501	0.0568366	1.24537		AFUN000100	18.747	0.35147	1.52632	0.230272	0.81788	0.0873104	0.985365	0.00640266		AFUN000100	34.5544	0.916986	0.885377	1.0357	0.300342	0.522384	1	0
AFUN000101	59467260	59469120	1861	others	No	cDNA	AFUN000101	others	Neur_chan_LBD domain-containing protein [Source:UniProtKB/TrEMBL;Acc:A0A182R1R2]	NA	No	AFUN000101	22.9803	-1.92012	0.841275	-2.28239	0.0224661	1.64847	0.0532569	1.27362		AFUN000101	24.727	-1.7842	1.32853	-1.34298	0.179277	0.746476	0.757452	0.120645		AFUN000101	16.493	-0.569473	1.02767	-0.554142	0.579482	0.23696	1	0
AFUN000102	59470442	59473015	2574	others	No	cDNA	AFUN000102	others	neuronal PAS domain protein [Source:Projected from Anopheles gambiae (AGAP010058) VB Community Annotation]	NA	No	AFUN000102	6.00782	-1.24545	0.706608	-1.76257	0.0779728	1.10806	0.147619	0.830856		AFUN000102	3.7447	0.0803539	2.9982	0.0268007	0.978619	0.00938649	0.997711	0.000995067		AFUN000102	5.40414	-0.289584	0.916863	-0.315843	0.752122	0.123712	1	0
AFUN000103	59477005	59479202	2198	others	No	cDNA	AFUN000103	others	nicotinic acetylcholine receptor, beta-2 subunit [Source:Projected from Anopheles gambiae (AGAP010057) VB Community Annotation]	NA	No	AFUN000103	68.143	0.245154	0.442362	0.554194	0.579446	0.236987	0.684766	0.164458		AFUN000103	39.9973	-0.678227	1.1491	-0.590225	0.55504	0.255676	0.95664	0.0192516		AFUN000103	57.4543	0.716461	0.586939	1.22067	0.222209	0.653237	1	0
AFUN000104	59479578	59483998	4421	others	No	cDNA	AFUN000104	others	hexosaminidase [Source:Projected from Anopheles gambiae (AGAP010056) VB Community Annotation]	NA	No	AFUN000104	262.773	0.229092	0.413926	0.553462	0.579947	0.236612	0.685167	0.164203		AFUN000104	218.706	0.60481	0.689357	0.877355	0.380294	0.419881	0.897918	0.0467634		AFUN000104	255.021	-0.213661	0.488327	-0.437537	0.661722	0.179325	1	0
AFUN000105	59484902	59499287	14386	others	No	cDNA	AFUN000105	others	Codanin-1_C domain-containing protein [Source:UniProtKB/TrEMBL;Acc:A0A182R1R6]	NA	No	AFUN000105	193.494	0.691181	0.234792	2.9438	0.00324213	2.48917	0.0104546	1.98069	x	AFUN000105	164.412	0.962394	0.718152	1.3401	0.180213	0.744213	0.758195	0.120219		AFUN000105	193.423	-0.198094	0.283811	-0.697976	0.485192	0.314086	1	0
AFUN000106	59524673	59535394	10722	others	No	cDNA	AFUN000106	others	unspecified product	NA	No	AFUN000106	2949.68	1.17069	0.22398	5.22673	1.7253e-07	6.76313	1.6644e-06	5.77874	x	AFUN000106	1869.07	1.23508	0.560983	2.20163	0.0276912	1.55766	0.299504	0.523597		AFUN000106	2852.66	0.269116	0.251366	1.07061	0.284343	0.546157	1	0
AFUN000107	59564016	59565639	1624	others	No	cDNA	AFUN000107	others	G_PROTEIN_RECEP_F1_2 domain-containing protein [Source:UniProtKB/TrEMBL;Acc:A0A182R1R8]	NA	No	AFUN000107	9.28515	-1.37818	0.661354	-2.08387	0.0371719	1.42979	0.0805432	1.09397		AFUN000107	8.84332	-0.656792	2.14792	-0.305781	0.759771	0.119317	0.985365	0.00640266		AFUN000107	8.02165	-0.624672	0.970438	-0.643701	0.519769	0.284189	1	0
AFUN000108	59568159	59572169	4011	others	No	cDNA	AFUN000108	others	Peptidase M12B domain-containing protein [Source:UniProtKB/TrEMBL;Acc:A0A182R1R9]	NA	No	AFUN000108	23.9158	-1.25597	0.522148	-2.40539	0.016155	1.79169	0.0404287	1.39331	x	AFUN000108	7.79555	-5.31996	2.6294	-2.02326	0.0430463	1.36606	0.393174	0.405416		AFUN000108	17.0827	4.45981	1.51161	2.95036	0.00317404	2.49839	0.7112	0.148008
AFUN000109	59573797	59589578	15782	others	No	cDNA	AFUN000109	others	Carbonic anhydrase [Source:UniProtKB/TrEMBL;Acc:A0A182R1S0]	NA	No	AFUN000109	2524.25	-1.26344	0.195662	-6.45726	1.06613e-10	9.97219	1.73324e-09	8.76114	x	AFUN000109	1921.99	-2.16388	0.62425	-3.46636	0.000527551	3.27774	0.0136791	1.86394	x	AFUN000109	1810.03	0.575296	0.28449	2.0222	0.0431552	1.36497	1	0
AFUN000110	59590457	59592920	2464	others	No	cDNA	AFUN000110	others	unspecified product	NA	No	AFUN000110	1067.84	0.0430851	0.157577	0.273423	0.784528	0.105392	0.848697	0.0712471		AFUN000110	830.68	-0.223674	0.573539	-0.38999	0.696544	0.157051	0.982577	0.00763328		AFUN000110	954.012	0.0763781	0.179292	0.425998	0.670109	0.173855	1	0
AFUN000111	59593117	59600756	7640	others	No	cDNA	AFUN000111	others	unspecified product	NA	No	AFUN000111	590.523	-0.328764	0.174252	-1.88672	0.059198	1.22769	0.117888	0.928531		AFUN000111	486.969	-0.1101	0.604225	-0.182217	0.855412	0.0678245	0.987156	0.00561427		AFUN000111	536.496	-0.177269	0.220583	-0.803636	0.421607	0.375092	1	0
AFUN000114	59659747	59672699	12953	others	No	cDNA	AFUN000114	others	MFS_1_like domain-containing protein [Source:UniProtKB/TrEMBL;Acc:A0A182R1S5]	NA	No	AFUN000114	544.888	-0.923012	0.2799	-3.29764	0.000974998	3.011	0.00366644	2.43576	x	AFUN000114	450.538	-1.02919	0.602352	-1.70862	0.0875223	1.05788	0.585099	0.232771		AFUN000114	445.512	-0.0503622	0.327704	-0.153682	0.877861	0.0565745	1	0
AFUN000117	59738639	59745946	7308	others	No	cDNA	AFUN000117	others	unspecified product	NA	No	AFUN000117	2709.57	-0.420988	0.143093	-2.94207	0.00326028	2.48675	0.0104993	1.97884	x	AFUN000117	2226.34	-0.349423	0.54949	-0.635904	0.524839	0.279974	0.951305	0.0216802		AFUN000117	2399.32	-0.122623	0.176831	-0.693448	0.488028	0.311555	1	0
AFUN000118	59746167	59750784	4618	others	No	cDNA	AFUN000118	others	Kazal-like domain-containing protein [Source:UniProtKB/TrEMBL;Acc:A0A182R1S9]	NA	No	AFUN000118	120.216	0.159454	0.416033	0.383272	0.701518	0.153961	0.787326	0.103845		AFUN000118	123.264	0.481805	0.832943	0.578437	0.562969	0.249515	0.960087	0.0176896		AFUN000118	119.337	-0.50875	0.526056	-0.967101	0.333493	0.476913	1	0
AFUN000119	59766254	59771126	4873	others	No	cDNA	AFUN000119	others	solute carrier organic anion transporter family member [Source:Projected from Anopheles gambiae (AGAP010042) VB Community Annotation]	NA	No	AFUN000119	288.74	0.015496	0.280444	0.0552551	0.955935	0.0195715	0.970922	0.0128158		AFUN000119	238.339	-0.179593	0.657551	-0.273124	0.784758	0.105264	0.985365	0.00640266		AFUN000119	260.487	-0.0328535	0.32268	-0.101814	0.918904	0.0367299	1	0
AFUN000120	59839950	59844052	4103	others	No	cDNA	AFUN000120	others	F-box and WD-40 domain protein [Source:Projected from Anopheles gambiae (AGAP010041) VB Community Annotation]	NA	No	AFUN000120	247.529	-0.876393	0.277876	-3.1539	0.00161106	2.79289	0.00565356	2.24768	x	AFUN000120	176.574	-0.517631	0.703797	-0.735483	0.462045	0.335316	0.929766	0.0316263		AFUN000120	213.557	-0.0482131	0.326837	-0.147514	0.882726	0.0541741	1	0
AFUN000121	59846121	59848573	2453	others	No	cDNA	AFUN000121	others	unspecified product	NA	No	AFUN000121	138.539	0.582902	0.223301	2.61038	0.00904412	2.04363	0.0248611	1.60448	x	AFUN000121	92.0927	0.511483	0.824542	0.620323	0.535045	0.27161	0.953929	0.0204837		AFUN000121	129.47	0.23686	0.272705	0.868559	0.385088	0.41444	1	0
AFUN000122	59849250	59849675	426	others	No	cDNA	AFUN000122	others	unspecified product	NA	No	AFUN000122	524.296	-4.45461	1.45327	-3.06522	0.00217509	2.66252	0.00736397	2.13289	x	AFUN000122	948.446	-6.21832	0.610937	-10.1783	2.47772e-24	23.6059	8.81919e-22	21.0546	x	AFUN000122	110.369	0.454409	1.4795	0.307137	0.758739	0.119908	1	0
AFUN000125	59884244	59890211	5968	others	No	cDNA	AFUN000125	others	TORC1 growth control complex subunit Kog1 [Source:Projected from Anopheles gambiae (AGAP010035) VB Community Annotation]	NA	No	AFUN000125	819.171	0.121035	0.148165	0.816894	0.413989	0.383011	0.538717	0.268639		AFUN000125	658.855	0.281451	0.593682	0.474077	0.635445	0.196922	0.972766	0.0119916		AFUN000125	769.947	-0.113908	0.198542	-0.57372	0.566157	0.247063	1	0
AFUN000126	59890571	59891566	996	others	No	cDNA	Med6	others	mediator of RNA polymerase II transcription subunit 6	Med6	No	AFUN000126	43.4213	1.33031	0.369436	3.60091	0.0003171	3.4988	0.00138839	2.85749	x	AFUN000126	23.3404	0.948488	1.3936	0.680605	0.496121	0.304412	0.941598	0.0261347		AFUN000126	40.5098	0.554554	0.484666	1.1442	0.252541	0.597669	1	0
AFUN000127	59891602	59892651	1050	others	No	cDNA	AFUN000127	others	unspecified product	NA	No	AFUN000127	13.5582	0.785776	0.560129	1.40285	0.160662	0.794088	0.262182	0.581397		AFUN000127	7.41601	1.06169	2.61782	0.405561	0.685065	0.164268	0.982577	0.00763328		AFUN000127	12.7372	0.377308	0.887697	0.425042	0.670806	0.173403	1	0
AFUN000130	59906124	59910148	4025	others	No	cDNA	AFUN000130	others	BZIP domain-containing protein [Source:UniProtKB/TrEMBL;Acc:A0A182R1U1]	NA	No	AFUN000130	570.785	0.595973	0.295303	2.01817	0.0435733	1.36078	0.0919368	1.03651		AFUN000130	334.839	0.147601	0.694188	0.212625	0.83162	0.0800752	0.985365	0.00640266		AFUN000130	513.445	0.515305	0.395764	1.30205	0.192899	0.714669	1	0
AFUN000133	60004413	60006505	2093	others	No	cDNA	AFUN000133	others	unspecified product	NA	No	AFUN000133	37.5359	0.246168	0.501108	0.491247	0.623252	0.205336	0.722617	0.141092		AFUN000133	21.0641	-0.483033	1.40422	-0.343986	0.730857	0.136168	0.984947	0.00658717		AFUN000133	32.1083	0.703292	0.630815	1.11489	0.264895	0.576926	1	0
AFUN000134	60006642	60009125	2484	others	No	cDNA	AFUN000134	others	unspecified product	NA	No	AFUN000134	2.69117	-2.37749	1.47591	-1.61086	0.107209	0.969768	0.190945	0.719092		AFUN000134	2.17203	-4.92078	4.62957	-1.0629	0.287827	0.540869	1	0		AFUN000134	1.43727	2.00911	2.81418	0.713924	0.475274	0.323056	1	0
AFUN000136	60035054	60039200	4147	others	No	cDNA	AFUN000136	others	Rab GDP dissociation inhibitor beta [Source:Projected from Anopheles gambiae (AGAP010025) VB Community Annotation]	NA	No	AFUN000136	2426.12	0.805262	0.125081	6.43794	1.21104e-10	9.91684	1.94912e-09	8.71016	x	AFUN000136	1836.16	0.651475	0.549714	1.18512	0.235971	0.627141	0.811868	0.0905146		AFUN000136	2329.14	0.0606263	0.146991	0.412449	0.68001	0.167484	1	0
AFUN000139	31388884	31394227	5344	others	No	cDNA	AFUN000139	others	unspecified product	NA	No	AFUN000139	57.1346	0.0136933	0.236853	0.0578133	0.953897	0.0204984	0.96924	0.0135687		AFUN000139	53.6936	0.606416	0.974609	0.622214	0.533801	0.272621	0.953929	0.0204837		AFUN000139	56.5461	-0.457261	0.285873	-1.59953	0.109704	0.959779	1	0
AFUN000140	31390912	31392175	1264	others	No	cDNA	AFUN000140	others	unspecified product	NA	No	AFUN000140	40.2294	-0.899369	0.34475	-2.60876	0.00908723	2.04157	0.0249635	1.6027	x	AFUN000140	32.7516	-1.22225	1.16982	-1.04482	0.296107	0.528551	0.857797	0.0666153		AFUN000140	32.1314	0.0877577	0.453794	0.193387	0.846656	0.0722929	1	0
AFUN000148	93510429	93550732	40304	others	No	cDNA	AFUN000148	others	Guanylate cyclase [Source:UniProtKB/TrEMBL;Acc:A0A182R1V9]	NA	No	AFUN000148	93.5881	-0.475362	0.346535	-1.37176	0.170139	0.769197	0.274108	0.562079		AFUN000148	80.1499	-0.147494	0.916416	-0.160947	0.872135	0.0594162	0.988212	0.00514969		AFUN000148	85.05	-0.269372	0.468688	-0.574737	0.565469	0.247591	1	0
AFUN000149	93563022	93570095	7074	others	No	cDNA	AFUN000149	others	kinetochore-associated protein [Source:Projected from Anopheles gambiae (AGAP012160) VB Community Annotation]	NA	No	AFUN000149	276.781	1.20964	0.298251	4.05578	4.99677e-05	4.30131	0.000273121	3.56364	x	AFUN000149	161.762	0.832172	0.712126	1.16857	0.242575	0.615153	0.819056	0.0866863		AFUN000149	259.459	0.471459	0.347814	1.35549	0.175261	0.756315	1	0
AFUN000150	93570110	93572038	1929	others	No	cDNA	AFUN000150	others	unspecified product	NA	No	AFUN000150	23.0942	0.44204	0.567414	0.779044	0.435954	0.360559	0.560048	0.251775		AFUN000150	16.4793	0.0670914	1.55625	0.043111	0.965613	0.0151969	0.996107	0.0016942		AFUN000150	21.0469	0.22793	0.691803	0.329473	0.741798	0.129714	1	0
AFUN000151	93575659	93581085	5427	others	No	cDNA	AFUN000151	others	unspecified product	NA	No	AFUN000151	1006.3	0.54335	0.143978	3.77385	0.000160751	3.79385	0.000762983	3.11749	x	AFUN000151	714.739	0.475017	0.64878	0.73217	0.464065	0.333421	0.930254	0.0313982		AFUN000151	945.483	0.131926	0.272005	0.485014	0.627666	0.202271	1	0
AFUN000153	93601992	93613247	11256	others	No	cDNA	AFUN000153	others	unspecified product	NA	No	AFUN000153	103.233	2.50905	0.364168	6.88982	5.58616e-12	11.2529	1.10025e-10	9.95851	x	AFUN000153	97.3741	2.98664	0.888745	3.36052	0.00077797	3.10904	0.0190785	1.71946	x	AFUN000153	115.244	-0.332128	0.433009	-0.767023	0.443068	0.35353	1	0
AFUN000154	93613693	93615651	1959	others	No	cDNA	AFUN000154	others	F-box domain-containing protein [Source:UniProtKB/TrEMBL;Acc:A0A182R1W5]	NA	No	AFUN000154	57.8407	0.319394	0.395751	0.807058	0.419633	0.37713	0.544397	0.264084		AFUN000154	27.5305	-1.55634	1.25889	-1.23628	0.216356	0.664831	0.794258	0.100038		AFUN000154	45.6108	1.49844	0.516763	2.89967	0.00373554	2.42765	0.78387	0.105756
AFUN000157	93637206	93645374	8169	others	No	cDNA	AFUN000157	others	phosphatidylserine synthase [Source:Projected from Anopheles gambiae (AGAP012146) VB Community Annotation]	NA	No	AFUN000157	237.523	0.483027	0.151368	3.19108	0.00141743	2.8485	0.00507452	2.2946	x	AFUN000157	217.922	0.610383	0.68976	0.88492	0.3762	0.424582	0.897125	0.0471472		AFUN000157	234.161	-0.294376	0.20948	-1.40527	0.159942	0.796038	1	0
AFUN000159	93646899	93647445	547	others	No	cDNA	AFUN000159	others	unspecified product	NA	No	AFUN000159	97.1229	-0.141692	0.305737	-0.463445	0.643046	0.191758	0.739987	0.130776		AFUN000159	83.2013	-0.309806	0.844838	-0.366705	0.713839	0.146399	0.983533	0.00721112		AFUN000159	86.6466	-0.092837	0.361024	-0.25715	0.797063	0.0985072	1	0
AFUN000160	93648196	93649449	1254	others	No	cDNA	AFUN000160	others	mTERF domain-containing protein, mitochondrial [Source:Projected from Anopheles gambiae (AGAP012143) VB Community Annotation]	NA	No	AFUN000160	35.012	-1.44758	0.460095	-3.14627	0.00165367	2.78155	0.00578302	2.23784	x	AFUN000160	25.6185	-2.06188	1.31995	-1.56208	0.118268	0.927132	0.66057	0.180081		AFUN000160	25.4808	0.435223	0.640264	0.679756	0.496659	0.303942	1	0
AFUN000163	93687187	93690539	3353	others	No	cDNA	AFUN000163	others	Eukaryotic translation initiation factor 3 subunit B [Source:UniProtKB/TrEMBL;Acc:A0A182R1X4]	NA	No	AFUN000163	1958.21	-0.620301	0.154538	-4.01391	5.97214e-05	4.22387	0.000317991	3.49759	x	AFUN000163	1462.66	-0.482941	0.553273	-0.87288	0.382729	0.417109	0.90012	0.0456996		AFUN000163	1699.3	-0.0141541	0.179641	-0.0787906	0.937199	0.0281681	1	0
AFUN000164	93691069	93693671	2603	others	No	cDNA	AFUN000164	others	USP domain-containing protein [Source:UniProtKB/TrEMBL;Acc:A0A182R1X5]	NA	No	AFUN000164	178.942	1.51126	0.333302	4.5342	5.78219e-06	5.23791	3.94642e-05	4.4038	x	AFUN000164	147.17	1.12199	0.733682	1.52925	0.126201	0.898936	0.672544	0.172279		AFUN000164	179.679	-0.0324012	0.358963	-0.0902635	0.928078	0.0324156	1	0
AFUN000165	93693728	93694838	1111	others	No	cDNA	RpL21	others	60S ribosomal protein L21	RpL21	No	AFUN000165	1984.53	3.03737	0.235915	12.8749	6.23335e-38	37.2053	1.34841e-35	34.8702	x	AFUN000165	1610.57	2.70254	0.557267	4.84964	1.23689e-06	5.90767	6.515e-05	4.18609	x	AFUN000165	2120.43	-0.0544284	0.23518	-0.231433	0.816978	0.0877894	1	0
AFUN000166	93695201	93696222	1022	others	No	cDNA	AFUN000166	others	RRM domain-containing protein [Source:UniProtKB/TrEMBL;Acc:A0A182R1X7]	NA	No	AFUN000166	14.1725	0.420266	0.478427	0.878432	0.379709	0.420549	0.503662	0.297861		AFUN000166	17.3756	1.05132	1.52725	0.688378	0.491214	0.308729	0.941303	0.0262708		AFUN000166	15.4052	-0.821206	0.533576	-1.53906	0.12379	0.907315	1	0
AFUN000167	93696232	93697137	906	others	No	cDNA	mRpS25	others	28S ribosomal protein S25, mitochondrial	mRpS25	No	AFUN000167	21.7975	6.82061	1.43365	4.75751	1.95996e-06	5.70775	1.49076e-05	4.82659	x	AFUN000167	16.1294	5.0294	2.17769	2.30951	0.0209154	1.67953	0.245918	0.609209		AFUN000167	23.4736	0.0880996	0.993913	0.0886391	0.929369	0.0318119	1	0
AFUN000168	93697449	93698746	1298	others	No	cDNA	AFUN000168	others	26S proteasome 26S non-ATPase subunit N8 [Source:Projected from Anopheles gambiae (AGAP012135) VB Community Annotation]	NA	No	AFUN000168	73.2063	4.83011	0.56614	8.53165	1.44272e-17	16.8408	6.1378e-16	15.212	x	AFUN000168	66.897	4.49488	1.0828	4.15116	3.30795e-05	4.48044	0.00122572	2.91161	x	AFUN000168	82.8782	-0.236092	0.484691	-0.487098	0.626189	0.203295	1	0
AFUN000169	93699060	93706237	7178	others	No	cDNA	AFUN000169	others	HIV-1 Vpr-binding protein [Source:Projected from Anopheles gambiae (AGAP012134) VB Community Annotation]	NA	No	AFUN000169	538.027	0.486149	0.268921	1.80778	0.0706408	1.15094	0.136542	0.864733		AFUN000169	408.602	1.02574	0.627265	1.63526	0.101995	0.99142	0.617545	0.209331		AFUN000169	529.575	-0.104827	0.301919	-0.347202	0.728439	0.137607	1	0
AFUN000173	86518469	86519817	1349	others	No	cDNA	AFUN000173	others	unspecified product	NA	No	AFUN000173	2.18583	1.82107	1.69665	1.07333	0.283124	0.548023	0.406059	0.391411		AFUN000173	0.869547	0.413646	5.88076	0.0703387	0.943924	0.025063	1	0		AFUN000173	1.93322	1.12674	2.17672	0.517629	0.604717	0.218448	1	0
AFUN000174	86514540	86516786	2247	others	No	cDNA	AFUN000174	others	unspecified product	NA	No	AFUN000174	3.56128	-5.20841	1.28785	-4.04428	5.24843e-05	4.27997	0.000283958	3.54675	x	AFUN000174	2.65471	-5.2103	4.24313	-1.22794	0.219471	0.658624	0.794258	0.100038		AFUN000174	1.97664	0.00706661	2.65171	0.00266493	0.997874	0.000924425	1	0
AFUN000176	86506730	86507315	586	others	No	cDNA	AFUN000176	others	Chitin-binding type-2 domain-containing protein [Source:UniProtKB/TrEMBL;Acc:A0A182R1Y7]	NA	No	AFUN000176	0.963716	2.12951	2.81974	0.755214	0.45012	0.346671	0.573113	0.24176		AFUN000176	0.241337	-1.75094	5.94809	-0.294371	0.768474	0.114371	1	0		AFUN000176	0.70578	2.1872	4.03212	0.542444	0.587512	0.230983	1	0
AFUN000177	86504216	86504932	717	others	No	cDNA	AFUN000177	others	Chitin-binding type-2 domain-containing protein [Source:UniProtKB/TrEMBL;Acc:A0A182R1Y8]	NA	No	AFUN000177	0.458895	-2.77195	3.39249	-0.817084	0.41388	0.383125	1	0		AFUN000177	0.482674	-2.75089	5.85998	-0.469437	0.638757	0.194664	1	0		AFUN000177	0.204963	0	4.08048	0	1	0	1	0
AFUN000178	86498406	86499992	1587	others	No	cDNA	AFUN000178	others	unspecified product	NA	No	AFUN000178	4.06097	-0.855472	1.03017	-0.830417	0.406303	0.39115	0.531479	0.274514		AFUN000178	3.76773	-1.45532	2.99807	-0.485418	0.62738	0.20247	0.971421	0.0125923		AFUN000178	3.12927	0.0644718	1.37178	0.0469987	0.962514	0.0165928	1	0
AFUN000179	86478394	86496421	18028	others	No	cDNA	AFUN000179	others	allatotropin [Source:Projected from Anopheles gambiae (AGAP012130) VB Community Annotation]	NA	No	AFUN000179	286.26	-1.04552	0.264846	-3.94764	7.89241e-05	4.10279	0.000406336	3.39111	x	AFUN000179	254.015	-0.384599	0.758299	-0.507186	0.612024	0.213232	0.969848	0.0132962		AFUN000179	254.029	-0.49909	0.406976	-1.22634	0.220071	0.657436	1	0
AFUN000180	86464919	86466662	1744	others	No	cDNA	AFUN000180	others	dimethyladenosine transferase 1, mitochondrial [Source:Projected from Anopheles gambiae (AGAP012129) VB Community Annotation]	NA	No	AFUN000180	702.054	0.343036	0.22147	1.5489	0.121405	0.915763	0.210558	0.676629		AFUN000180	616.679	0.142125	0.59238	0.239922	0.810391	0.0913055	0.985365	0.00640266		AFUN000180	658.734	-0.131911	0.239185	-0.551502	0.58129	0.235607	1	0
AFUN000181	86457929	86459041	1113	others	No	cDNA	AFUN000181	others	unspecified product	NA	No	AFUN000181	1.78269	-4.14549	1.79441	-2.31022	0.0208757	1.68036	0.0502585	1.29879		AFUN000181	2.89604	-5.33584	4.08813	-1.3052	0.191824	0.717097	0.764333	0.116717		AFUN000181	0.432683	0.00707344	4.08048	0.00173348	0.998617	0.000601096	1	0
AFUN000183	86442841	86445535	2695	others	No	cDNA	AFUN000183	others	unspecified product	NA	No	AFUN000183	304.89	0.53134	0.191136	2.77991	0.00543735	2.26461	0.0161915	1.79071	x	AFUN000183	220.181	0.899992	0.69168	1.30117	0.193201	0.713991	0.767432	0.11496		AFUN000183	295.419	0.000198572	0.228309	0.000869751	0.999306	0.000301488	1	0
AFUN000186	991546	993481	1936	others	No	cDNA	AFUN000186	others	thioredoxin domain-containing protein [Source:Projected from Anopheles gambiae (AGAP000044) VB Community Annotation]	NA	No	AFUN000186	718.205	-0.153231	0.149747	-1.02326	0.306184	0.514018	0.429809	0.366724		AFUN000186	467.668	-0.291344	0.617062	-0.472148	0.636821	0.195982	0.972766	0.0119916		AFUN000186	629.385	0.288368	0.203434	1.4175	0.156336	0.805942	1	0
AFUN000188	1058494	1076512	18019	others	No	cDNA	AFUN000188	others	histone-lysine N-methyltransferase [Source:Projected from Anopheles gambiae (AGAP000042) VB Community Annotation]	NA	No	AFUN000188	2217.82	0.622592	0.179674	3.46512	0.000529997	3.27573	0.00217224	2.66309	x	AFUN000188	1562.91	0.527647	0.567813	0.929263	0.352753	0.45253	0.884113	0.0534923		AFUN000188	2089.71	0.150854	0.229267	0.657986	0.510547	0.291964	1	0
AFUN000189	1079664	1088615	8952	others	No	cDNA	AFUN000189	others	SET domain-containing protein [Source:UniProtKB/TrEMBL;Acc:A0A182R200]	NA	No	AFUN000189	271.063	-2.03157	0.275906	-7.36325	1.7949e-13	12.746	4.49182e-12	11.3476	x	AFUN000189	319.194	-1.99555	0.66529	-2.99952	0.00270409	2.56798	0.0540175	1.26747		AFUN000189	184.88	-0.629033	0.262025	-2.40066	0.0163654	1.78607	1	0
AFUN000190	1088966	1094623	5658	others	No	cDNA	AFUN000190	others	MFS domain-containing protein [Source:UniProtKB/TrEMBL;Acc:A0A182R201]	NA	No	AFUN000190	298.239	-0.702354	0.371685	-1.88965	0.058805	1.23059	0.117288	0.930745		AFUN000190	267.317	-1.3746	0.680708	-2.01936	0.0434495	1.36202	0.39532	0.403051		AFUN000190	232.338	0.119022	0.41128	0.289394	0.77228	0.112225	1	0
AFUN000191	1100021	1105265	5245	others	No	cDNA	AFUN000191	others	gamma-aminobutyric acid receptor subunit alpha [Source:Projected from Anopheles gambiae (AGAP000039) VB Community Annotation]	NA	No	AFUN000191	27.764	-0.597134	0.393332	-1.51814	0.128979	0.889483	0.221168	0.655278		AFUN000191	20.7046	-0.324027	1.40366	-0.230844	0.817436	0.0875462	0.985365	0.00640266		AFUN000191	24.4804	-0.0553307	0.505046	-0.109556	0.912762	0.0396426	1	0
AFUN000192	1109426	1114979	5554	others	No	cDNA	AFUN000192	others	gamma-aminobutyric acid receptor subunit beta [Source:Projected from Anopheles gambiae (AGAP000038) VB Community Annotation]	NA	No	AFUN000192	120.498	-0.645976	0.368294	-1.75397	0.079436	1.09998	0.149799	0.82449		AFUN000192	93.8824	-0.579467	0.84439	-0.686255	0.492552	0.307548	0.941598	0.0261347		AFUN000192	103.777	-0.0394645	0.464586	-0.0849454	0.932305	0.0304421	1	0
AFUN000193	1117946	1133042	15097	others	No	cDNA	AFUN000193	others	unspecified product	NA	No	AFUN000193	1898.74	0.270716	0.30565	0.885708	0.375775	0.425072	0.499793	0.30121		AFUN000193	1504.19	0.616867	0.629964	0.97921	0.327476	0.48482	0.879008	0.0560073		AFUN000193	1830.37	-0.134759	0.397561	-0.338965	0.734636	0.133928	1	0
AFUN000194	1136330	1144693	8364	others	No	cDNA	AFUN000194	others	unspecified product	NA	No	AFUN000194	1399.76	-0.802743	0.138589	-5.79225	6.94484e-09	8.15834	8.53099e-08	7.069	x	AFUN000194	1069.09	-0.842366	0.561474	-1.50028	0.133542	0.874381	0.685374	0.164072		AFUN000194	1169.43	0.0303973	0.16803	0.180904	0.856443	0.0673015	1	0
AFUN000195	1147162	1160898	13737	others	No	cDNA	AFUN000195	others	Protein retinal degeneration B [Source:Projected from Anopheles gambiae (AGAP000033) VB Community Annotation]	NA	No	AFUN000195	651.055	-0.574777	0.232937	-2.46752	0.0136054	1.86629	0.0351217	1.45442	x	AFUN000195	435.201	-0.484983	0.620499	-0.781601	0.434449	0.362061	0.923499	0.0345635		AFUN000195	561.698	0.16839	0.280839	0.599596	0.548775	0.260605	1	0
AFUN000197	1162211	1181336	19126	others	No	cDNA	AFUN000197	others	Integrin_alpha2 domain-containing protein [Source:UniProtKB/TrEMBL;Acc:A0A182R208]	NA	No	AFUN000197	2014.71	-0.976326	0.113297	-8.61742	6.84775e-18	17.1645	3.05587e-16	15.5149	x	AFUN000197	1632.54	-1.02926	0.571124	-1.80217	0.0715185	1.14558	0.532355	0.273799		AFUN000197	1647.67	-0.0455988	0.175818	-0.259352	0.795363	0.0994344	1	0
AFUN000200	1235255	1259081	23827	others	No	cDNA	AFUN000200	others	calcium/calmodulin-dependent protein kinase (CaM kinase) II [Source:Projected from Anopheles gambiae (AGAP000028) VB Community Annotation]	NA	No	AFUN000200	3817.38	-0.959643	0.270392	-3.54908	0.000386585	3.41276	0.00164851	2.78291	x	AFUN000200	2933.33	-0.696233	0.599286	-1.16177	0.245329	0.610251	0.820978	0.0856683		AFUN000200	3242.39	-0.12154	0.351883	-0.3454	0.729794	0.1368	1	0
AFUN000201	1259795	1266201	6407	others	No	cDNA	AFUN000201	others	unspecified product	NA	No	AFUN000201	569.114	0.155306	0.146999	1.05651	0.290735	0.536502	0.414321	0.382663		AFUN000201	460.052	0.172496	0.605683	0.284796	0.7758	0.11025	0.985365	0.00640266		AFUN000201	530.06	-0.0784343	0.18533	-0.423213	0.67214	0.17254	1	0
AFUN000202	1269425	1272494	3070	others	No	cDNA	AFUN000202	others	unspecified product	NA	No	AFUN000202	400.99	-0.0620282	0.27572	-0.224968	0.822004	0.085126	0.878663	0.0561776		AFUN000202	379.766	-0.0417729	0.803502	-0.0519885	0.958538	0.0183907	0.995906	0.00178163		AFUN000202	372.613	-0.303929	0.468149	-0.649214	0.5162	0.287182	1	0
AFUN000203	1274675	1275916	1242	others	No	cDNA	AFUN000203	others	unspecified product	NA	No	AFUN000203	117.575	1.40629	0.301735	4.66069	3.15151e-06	5.50148	2.28372e-05	4.64136	x	AFUN000203	93.9141	1.18869	0.819897	1.44981	0.147112	0.832353	0.706074	0.15115		AFUN000203	117.889	-0.0155456	0.336277	-0.0462285	0.963128	0.0163159	1	0
AFUN000204	1276465	1280202	3738	others	No	cDNA	AFUN000204	others	amino acid transporter protein [Source:Projected from Anopheles gambiae (AGAP000022) VB Community Annotation]	NA	No	AFUN000204	1256.84	0.15741	0.217686	0.723103	0.469617	0.328257	0.590629	0.228685		AFUN000204	992.17	0.0286963	0.705145	0.0406956	0.967539	0.0143317	0.996277	0.00161989		AFUN000204	1152.03	0.0044769	0.382897	0.0116922	0.990671	0.00407046	1	0
AFUN000205	1282007	1291563	9557	others	No	cDNA	AFUN000205	others	unspecified product	NA	No	AFUN000205	1132.71	0.175118	0.139446	1.25582	0.209182	0.679475	0.322517	0.491448		AFUN000205	752.585	-0.196914	0.574808	-0.342573	0.731919	0.135537	0.984947	0.00658717		AFUN000205	1002.34	0.337842	0.170459	1.98196	0.047484	1.32345	1	0
AFUN000206	1300278	1339470	39193	others	No	cDNA	AFUN000206	others	chaoptin [Source:Projected from Anopheles gambiae (AGAP000019) VB Community Annotation]	NA	No	AFUN000206	280.845	0.079922	0.316318	0.252663	0.800529	0.0966231	0.861625	0.0646818		AFUN000206	220.508	0.366832	0.694518	0.528183	0.597372	0.223755	0.965995	0.015025		AFUN000206	265.158	-0.111089	0.386546	-0.287387	0.773816	0.111362	1	0
AFUN000207	1292174	1313265	21092	others	No	cDNA	AFUN000207	others	F-box domain-containing protein [Source:UniProtKB/TrEMBL;Acc:A0A182R218]	NA	No	AFUN000207	263.89	0.589627	0.256862	2.2955	0.0217042	1.66346	0.0517488	1.2861		AFUN000207	186.742	1.08234	0.718409	1.50658	0.131918	0.879697	0.683203	0.16545		AFUN000207	257.557	0.00976527	0.290804	0.0335803	0.973212	0.0117926	1	0
AFUN000208	1342132	1361465	19334	others	No	cDNA	AFUN000208	others	phosphatidylinositol-4,5-bisphosphate 3-kinase [Source:Projected from Anopheles gambiae (AGAP000018) VB Community Annotation]	NA	No	AFUN000208	2295.06	-0.00957735	0.163874	-0.0584434	0.953395	0.0207269	0.969146	0.0136106		AFUN000208	1622.63	-0.0141373	0.554393	-0.0255005	0.979656	0.00892652	0.997835	0.000941156		AFUN000208	2073.25	0.123923	0.193766	0.639548	0.522466	0.281942	1	0
AFUN000209	1365108	1393241	28134	others	No	cDNA	AFUN000209	others	unspecified product	NA	No	AFUN000209	6755.93	-0.599179	0.135732	-4.41441	1.01286e-05	4.99445	6.56531e-05	4.18274	x	AFUN000209	5026.12	-0.757123	0.545951	-1.3868	0.165504	0.781191	0.736927	0.132576		AFUN000209	5694.3	0.119314	0.175618	0.679395	0.496887	0.303742	1	0
AFUN000210	1393693	1396599	2907	others	No	cDNA	AFUN000210	others	Class B Scavenger Receptor (CD36 domain). [Source:Projected from Anopheles gambiae (AGAP000016) VB Community Annotation]	NA	No	AFUN000210	118.914	0.594859	0.348993	1.7045	0.0882876	1.0541	0.163094	0.787563		AFUN000210	71.9151	-0.304158	0.90666	-0.335471	0.73727	0.132374	0.984947	0.00658717		AFUN000210	103.612	0.620693	0.430135	1.44302	0.149015	0.82677	1	0
AFUN000211	1398044	1427931	29888	others	No	cDNA	AFUN000211	others	proto-oncogene tyrosine-protein kinase ROS [Source:Projected from Anopheles gambiae (AGAP000015) VB Community Annotation]	NA	No	AFUN000211	482.188	0.0710407	0.243378	0.291894	0.770367	0.113302	0.838067	0.0767214		AFUN000211	465.384	-0.267094	0.620651	-0.430345	0.666944	0.17591	0.981802	0.00797592		AFUN000211	437.011	-0.20415	0.214478	-0.951843	0.341176	0.467021	1	0
AFUN000213	1441061	1443407	2347	others	No	cDNA	AFUN000213	others	unspecified product	NA	No	AFUN000213	351.414	0.27796	0.335912	0.827478	0.407966	0.389376	0.532781	0.273451		AFUN000213	321.456	0.211536	0.64762	0.326636	0.743943	0.12846	0.984947	0.00658717		AFUN000213	333.756	-0.22973	0.391246	-0.587175	0.557086	0.254078	1	0
AFUN000215	1446987	1448617	1631	others	No	cDNA	AFUN000215	others	Tyrosine--tRNA ligase [Source:UniProtKB/TrEMBL;Acc:A0A182R226]	NA	No	AFUN000215	59.3996	0.174065	0.25498	0.682661	0.494821	0.305552	0.613086	0.212479		AFUN000215	35.4239	0.173206	1.14163	0.151718	0.879409	0.055809	0.989609	0.00453626		AFUN000215	53.624	0.392179	0.324747	1.20765	0.227184	0.643623	1	0
AFUN000216	1449920	1452530	2611	others	No	cDNA	AFUN000216	others	vacuolar protein sorting [Source:Projected from Anopheles gambiae (AGAP000625) VB Community Annotation]	NA	No	AFUN000216	678.82	-0.212659	0.174979	-1.21534	0.224238	0.64929	0.33994	0.468598		AFUN000216	459.543	-0.360144	0.665599	-0.541083	0.58845	0.23029	0.963704	0.0160563		AFUN000216	592.621	0.237979	0.288246	0.825611	0.409025	0.38825	1	0
AFUN000217	1454844	1460754	5911	others	No	cDNA	AFUN000217	others	Vesicle-associated membrane protein-associated protein B [Source:Projected from Anopheles gambiae (AGAP000626) VB Community Annotation]	NA	No	AFUN000217	1896.86	-0.466199	0.134786	-3.45881	0.000542564	3.26555	0.00221238	2.65514	x	AFUN000217	1423.65	-0.385138	0.605727	-0.635828	0.524889	0.279933	0.951305	0.0216802		AFUN000217	1662.86	0.00306746	0.238212	0.012877	0.989726	0.00448505	1	0
AFUN000219	1465639	1467351	1713	others	No	cDNA	AFUN000219	others	cardiolipin synthase [Source:Projected from Anopheles gambiae (AGAP000843) VB Community Annotation]	NA	No	AFUN000219	187.18	0.460095	0.190174	2.41933	0.0155489	1.8083	0.0392041	1.40667	x	AFUN000219	154.471	0.445805	0.724331	0.615472	0.538243	0.269022	0.954252	0.0203369		AFUN000219	179.025	-0.101132	0.235191	-0.429998	0.667197	0.175746	1	0
AFUN000220	1468272	1481793	13522	others	No	cDNA	AFUN000220	others	unspecified product	NA	No	AFUN000220	806.229	-0.710768	0.328324	-2.16484	0.0304002	1.51712	0.0683938	1.16498		AFUN000220	755.306	-1.0179	0.592929	-1.71673	0.0860291	1.06535	0.582908	0.2344		AFUN000220	660.033	-0.136567	0.361751	-0.377518	0.705789	0.151325	1	0
AFUN000225	1571865	1583078	11214	others	No	cDNA	AFUN000225	others	unspecified product	NA	No	AFUN000225	487.751	-0.123766	0.317955	-0.389255	0.697088	0.156712	0.783733	0.105832		AFUN000225	342.619	-0.202715	0.673272	-0.301089	0.763346	0.117278	0.985365	0.00640266		AFUN000225	433.186	0.162078	0.404827	0.400365	0.688888	0.161851	1	0
AFUN000228	1585032	1586893	1862	others	No	cDNA	AFUN000228	others	syntaxin [Source:Projected from Anopheles gambiae (AGAP000850) VB Community Annotation]	NA	No	AFUN000228	98.1552	-0.28099	0.28416	-0.988844	0.32274	0.491148	0.447342	0.34936		AFUN000228	67.6194	-0.413997	0.898739	-0.460642	0.645055	0.190403	0.974174	0.0113633		AFUN000228	85.3677	0.21759	0.353315	0.615854	0.537991	0.269225	1	0
AFUN000230	1588650	1590516	1867	others	No	cDNA	AFUN000230	others	Small ubiquitin-related modifier [Source:UniProtKB/TrEMBL;Acc:A0A182R241]	NA	No	AFUN000230	2040.89	-0.0988299	0.135805	-0.727735	0.466776	0.330892	0.588391	0.230334		AFUN000230	1749.87	0.143878	0.549659	0.261759	0.793507	0.100449	0.985365	0.00640266		AFUN000230	1909.62	-0.235695	0.163344	-1.44294	0.149038	0.826703	1	0
AFUN000231	1593065	1597474	4410	others	No	cDNA	AFUN000231	others	gamma-glutamyltranspeptidase [Source:Projected from Anopheles gambiae (AGAP000853) VB Community Annotation]	NA	No	AFUN000231	99.763	-0.0198721	0.259472	-0.076587	0.938952	0.0273566	0.960308	0.0175895		AFUN000231	74.0933	-0.557645	0.879365	-0.634146	0.525986	0.279026	0.951572	0.0215581		AFUN000231	85.9259	0.26386	0.316619	0.833368	0.404637	0.392934	1	0
AFUN000232	1602302	1619379	17078	others	No	cDNA	AFUN000232	others	G_PROTEIN_RECEP_F1_2 domain-containing protein [Source:UniProtKB/TrEMBL;Acc:A0A182R243]	NA	No	AFUN000232	68.909	0.376872	0.29535	1.27602	0.201949	0.694759	0.313523	0.503731		AFUN000232	49.6091	0.37978	1.00419	0.378197	0.705285	0.151636	0.982577	0.00763328		AFUN000232	64.4106	0.107157	0.36236	0.295721	0.767444	0.114954	1	0
AFUN000233	1620256	1621608	1353	others	No	cDNA	AFUN000233	others	unspecified product	NA	No	AFUN000233	206.563	-0.100438	0.208066	-0.482721	0.629294	0.201147	0.728044	0.137843		AFUN000233	145.96	0.217271	0.730126	0.297581	0.766023	0.115758	0.985365	0.00640266		AFUN000233	190.184	0.0176404	0.233239	0.0756322	0.939712	0.0270054	1	0
AFUN000234	1621766	1624066	2301	others	No	cDNA	AFUN000234	others	tRNA-dihydrouridine synthase [Source:Projected from Anopheles gambiae (AGAP000856) VB Community Annotation]	NA	No	AFUN000234	278.79	-0.0889321	0.126163	-0.7049	0.480873	0.31797	0.600056	0.221808		AFUN000234	196.319	-0.386698	0.716442	-0.539747	0.589371	0.229611	0.963704	0.0160563		AFUN000234	243.331	0.225913	0.224272	1.00731	0.313783	0.50337	1	0
AFUN000235	1624214	1625879	1666	others	No	cDNA	mRpL3	others	39S ribosomal protein L3, mitochondrial	mRpL3	No	AFUN000235	225.366	1.38231	0.240985	5.73609	9.68892e-09	8.01372	1.16331e-07	6.93431	x	AFUN000235	182.665	1.01782	0.702571	1.44871	0.147418	0.831449	0.706074	0.15115		AFUN000235	224.21	-0.013262	0.255369	-0.0519327	0.958582	0.0183706	1	0
AFUN000236	1630845	1633235	2391	others	No	cDNA	AFUN000236	others	unspecified product	NA	No	AFUN000236	49.1465	-0.579342	0.364327	-1.59017	0.111797	0.951571	0.197326	0.704816		AFUN000236	34.068	-0.362371	1.19298	-0.303754	0.761315	0.118436	0.985365	0.00640266		AFUN000236	43.0103	0.0851767	0.495391	0.171938	0.863486	0.0637447	1	0
AFUN000237	1639609	1663043	23435	others	No	cDNA	AFUN000237	others	Fascin [Source:UniProtKB/TrEMBL;Acc:A0A182R248]	NA	No	AFUN000237	447.139	-0.112871	0.206997	-0.545277	0.585563	0.232427	0.690396	0.160902		AFUN000237	317.102	-0.319585	0.630752	-0.506672	0.612385	0.212975	0.969848	0.0132962		AFUN000237	393.057	0.193018	0.251618	0.767105	0.443019	0.353578	1	0
AFUN000238	1663193	1665747	2555	others	No	cDNA	AFUN000238	others	Homeobox domain-containing protein [Source:UniProtKB/TrEMBL;Acc:A0A182R249]	NA	No	AFUN000238	100.709	0.220196	0.316021	0.696777	0.485942	0.313415	0.605081	0.218186		AFUN000238	74.958	0.222092	0.892198	0.248927	0.803418	0.0950587	0.985365	0.00640266		AFUN000238	93.3276	0.058176	0.396788	0.146617	0.883434	0.0538258	1	0
AFUN000239	1667205	1668502	1298	others	No	cDNA	AFUN000239	others	unspecified product	NA	No	AFUN000239	10.7048	-1.6677	0.712694	-2.34	0.0192837	1.71481	0.0470768	1.32719	x	AFUN000239	9.94777	-2.42357	1.96583	-1.23285	0.217633	0.662274	0.794258	0.100038		AFUN000239	7.17057	0.246626	0.990616	0.248963	0.80339	0.0950737	1	0
AFUN000240	1669284	1675812	6529	others	No	cDNA	AFUN000240	others	Protein tweety homolog [Source:UniProtKB/TrEMBL;Acc:A0A182R251]	NA	No	AFUN000240	170.489	0.384024	0.269066	1.42725	0.153508	0.813869	0.252966	0.596938		AFUN000240	105.97	-0.00941103	0.786617	-0.0119639	0.990454	0.00416552	0.999499	0.000217778		AFUN000240	152.355	0.42937	0.324313	1.32394	0.185524	0.731599	1	0
AFUN000241	1679793	1685004	5212	others	No	cDNA	AFUN000241	others	unspecified product	NA	No	AFUN000241	500.54	0.441597	0.147396	2.99598	0.00273562	2.56294	0.00901257	2.04515	x	AFUN000241	357.815	0.733372	0.633101	1.15838	0.246709	0.607814	0.821146	0.0855798		AFUN000241	479.186	0.0288026	0.166448	0.173043	0.862618	0.0641816	1	0
AFUN000242	1685740	1689854	4115	others	No	cDNA	AFUN000242	others	alpha 1,3-glucosidase [Source:Projected from Anopheles gambiae (AGAP000862) VB Community Annotation]	NA	No	AFUN000242	1042.29	-0.13518	0.112225	-1.20455	0.228378	0.641346	0.344496	0.462815		AFUN000242	800.195	-0.132503	0.572378	-0.231495	0.81693	0.087815	0.985365	0.00640266		AFUN000242	938.469	0.00195783	0.141203	0.0138654	0.988937	0.00483121	1	0
AFUN000243	1763127	1807182	44056	others	No	cDNA	AFUN000243	others	lachesin [Source:Projected from Anopheles gambiae (AGAP000863) VB Community Annotation]	NA	No	AFUN000243	134.482	0.200611	0.314783	0.637298	0.523931	0.280726	0.637762	0.195342		AFUN000243	96.7003	-0.0439154	0.837759	-0.0524201	0.958194	0.0185466	0.995906	0.00178163		AFUN000243	121.417	0.184793	0.402082	0.459591	0.64581	0.189895	1	0
AFUN000244	1842464	1846492	4029	others	No	cDNA	AFUN000244	others	PH domain-containing protein [Source:UniProtKB/TrEMBL;Acc:A0A182R255]	NA	No	AFUN000244	442.364	-0.497301	0.17493	-2.84285	0.00447121	2.34957	0.0136718	1.86417	x	AFUN000244	346.454	-0.774148	0.628042	-1.23264	0.217711	0.662119	0.794258	0.100038		AFUN000244	372.624	0.0930105	0.213268	0.436121	0.662749	0.178651	1	0
AFUN000247	1880101	1881908	1808	others	No	cDNA	AFUN000247	others	unspecified product	NA	No	AFUN000247	129.296	-0.64186	0.203134	-3.15978	0.00157888	2.80165	0.00555591	2.25525	x	AFUN000247	95.5368	-0.722724	0.809495	-0.892809	0.37196	0.429504	0.894131	0.0485987		AFUN000247	109.365	0.0924019	0.266237	0.347066	0.728542	0.137545	1	0
AFUN000248	1885710	1896400	10691	others	No	cDNA	AFUN000248	others	beta-1,4-mannosyltransferase egghead protein [Source:Projected from Anopheles gambiae (AGAP000868) VB Community Annotation]	NA	No	AFUN000248	803.443	0.731223	0.283407	2.58012	0.00987666	2.00539	0.0268604	1.57089	x	AFUN000248	790.172	1.3375	0.597497	2.23851	0.0251881	1.59881	0.280169	0.552579		AFUN000248	847.615	-0.47272	0.343251	-1.37719	0.168454	0.773518	1	0
AFUN000249	1902539	1937894	35356	others	No	cDNA	AFUN000249	others	unspecified product	NA	No	AFUN000249	1668.94	1.5908	0.224314	7.09185	1.32333e-12	11.8783	2.87501e-11	10.5414	x	AFUN000249	1017.59	1.25658	0.636053	1.97559	0.0482015	1.31694	0.422774	0.373891		AFUN000249	1606.33	0.388336	0.32536	1.19356	0.23265	0.633297	1	0
AFUN000251	2088068	2099332	11265	others	No	cDNA	AFUN000251	others	unspecified product	NA	No	AFUN000251	105.312	-0.362351	0.356005	-1.01783	0.30876	0.51038	0.432616	0.363897		AFUN000251	74.4386	-0.453359	0.913776	-0.496138	0.619797	0.207751	0.969848	0.0132962		AFUN000251	91.428	0.169976	0.462959	0.367152	0.713506	0.146603	1	0
AFUN000252	2174479	2186533	12055	others	No	cDNA	AFUN000252	others	unspecified product	NA	No	AFUN000252	127.858	-0.594611	0.25535	-2.32861	0.0198795	1.70159	0.048328	1.3158	x	AFUN000252	106.075	-0.797788	0.814658	-0.979291	0.327436	0.484874	0.879008	0.0560073		AFUN000252	107.637	-0.00681566	0.337439	-0.0201982	0.983885	0.00705554	1	0
AFUN000257	2376051	2377240	1190	others	No	cDNA	AFUN000257	others	unspecified product	NA	No	AFUN000257	18.4855	-0.35644	0.465878	-0.765094	0.444216	0.352406	0.567361	0.24614		AFUN000257	15.3	0.944678	1.65095	0.572204	0.567184	0.246276	0.961835	0.0168995		AFUN000257	18.3863	-0.43671	0.568987	-0.767522	0.442771	0.35382	1	0
AFUN000258	2442001	2443396	1396	others	No	cDNA	AFUN000258	others	solute carrier family [Source:Projected from Anopheles gambiae (AGAP000253) VB Community Annotation]	NA	No	AFUN000258	65.3983	0.274575	0.395829	0.693673	0.487888	0.31168	0.60707	0.216761		AFUN000258	65.0911	-0.100494	0.917237	-0.109562	0.912757	0.039645	0.99189	0.00353644		AFUN000258	60.6995	-0.247129	0.407353	-0.606672	0.544069	0.264346	1	0
AFUN000259	2443640	2446522	2883	others	No	cDNA	AFUN000259	others	oligopeptidase A [Source:Projected from Anopheles gambiae (AGAP000252) VB Community Annotation]	NA	No	AFUN000259	541.238	0.355165	0.144971	2.4499	0.0142895	1.84498	0.0365851	1.4367	x	AFUN000259	372.046	0.111473	0.627068	0.177768	0.858905	0.0660548	0.987156	0.00561427		AFUN000259	492.781	0.23244	0.197468	1.1771	0.239155	0.621321	1	0
AFUN000260	2447026	2451105	4080	others	No	cDNA	AFUN000260	others	UDENN domain-containing protein [Source:UniProtKB/TrEMBL;Acc:A0A182R271]	NA	No	AFUN000260	420.484	0.389325	0.14133	2.75472	0.00587419	2.23105	0.0172073	1.76429	x	AFUN000260	319.297	0.476781	0.65478	0.728155	0.466519	0.331131	0.930455	0.0313047		AFUN000260	398.549	-0.0100461	0.213872	-0.0469723	0.962535	0.0165833	1	0
AFUN000261	2451123	2452835	1713	others	No	cDNA	AFUN000261	others	STAGA complex 65 subunit gamma [Source:Projected from Anopheles gambiae (AGAP000250) VB Community Annotation]	NA	No	AFUN000261	200.68	-1.95152	0.211654	-9.22034	2.96159e-20	19.5285	1.73389e-18	17.761	x	AFUN000261	169.319	-2.01047	0.707255	-2.84263	0.00447424	2.34928	0.0803716	1.0949		AFUN000261	144.371	-0.0947485	0.273209	-0.346799	0.728742	0.137426	1	0
AFUN000262	2452997	2456196	3200	others	No	cDNA	AFUN000262	others	mannosyl-glycoprotein endo-beta-N-acetylglucosaminidase [Source:Projected from Anopheles gambiae (AGAP000249) VB Community Annotation]	NA	No	AFUN000262	229.935	0.149404	0.212657	0.70256	0.48233	0.316656	0.601346	0.220876		AFUN000262	158.182	-0.104289	0.716495	-0.145555	0.884273	0.0534136	0.990097	0.00432229		AFUN000262	205.683	0.250333	0.264738	0.945587	0.344359	0.462988	1	0
AFUN000263	2462156	2475783	13628	others	No	cDNA	AFUN000263	others	unspecified product	NA	No	AFUN000263	50.1704	-0.863098	0.267777	-3.2232	0.00126768	2.89699	0.00460426	2.33684	x	AFUN000263	35.4379	-0.954406	1.16384	-0.820051	0.412187	0.384906	0.917446	0.0374196		AFUN000263	41.4206	0.19963	0.409137	0.487929	0.6256	0.203703	1	0
AFUN000265	2477917	2482563	4647	others	No	cDNA	AFUN000265	others	unspecified product	NA	No	AFUN000265	377.726	-0.458582	0.173176	-2.64806	0.00809552	2.09176	0.0226051	1.64579	x	AFUN000265	262.003	-0.516774	0.654493	-0.78958	0.429773	0.366761	0.923499	0.0345635		AFUN000265	325.431	0.170868	0.221933	0.769909	0.441354	0.355213	1	0
AFUN000266	2484559	2504105	19547	others	No	cDNA	AFUN000266	others	Rhophilin-2 [Source:Projected from Anopheles gambiae (AGAP000243) VB Community Annotation]	NA	No	AFUN000266	523.343	0.602083	0.426893	1.41038	0.158427	0.800172	0.259497	0.585868		AFUN000266	305.786	-0.0243572	0.633834	-0.0384283	0.969346	0.0135211	0.996476	0.0015331		AFUN000266	465.152	0.580644	0.497464	1.16721	0.243126	0.614168	1	0
AFUN000267	2505800	2515948	10149	others	No	cDNA	AFUN000267	others	unspecified product	NA	No	AFUN000267	2345.16	-0.0226218	0.108542	-0.208416	0.834904	0.0783633	0.887916	0.051628		AFUN000267	1673.39	-0.0643193	0.587714	-0.10944	0.912854	0.0395989	0.99189	0.00353644		AFUN000267	2110.98	0.122523	0.200874	0.60995	0.541895	0.266085	1	0
AFUN000268	2517715	2519465	1751	others	No	cDNA	AFUN000268	others	SCP domain-containing protein [Source:UniProtKB/TrEMBL;Acc:A0A182R278]	NA	No	AFUN000268	78.5234	-1.14465	0.34959	-3.27428	0.00105933	2.97497	0.00393372	2.4052	x	AFUN000268	64.4577	-1.79766	0.969644	-1.85394	0.0637484	1.19553	0.501742	0.29952		AFUN000268	58.3579	0.301912	0.473626	0.637448	0.523833	0.280807	1	0
AFUN000269	2519477	2520378	902	others	No	cDNA	AFUN000269	others	E3 ubiquitin-protein ligase ZNRF1/2 [Source:Projected from Anopheles gambiae (AGAP000357) VB Community Annotation]	NA	No	AFUN000269	48.2133	0.426047	0.457767	0.930709	0.352004	0.453452	0.476267	0.322149		AFUN000269	51.3897	1.06003	1.08773	0.974534	0.329791	0.481761	0.880135	0.0554505		AFUN000269	50.8143	-0.605799	0.597484	-1.01392	0.310622	0.507767	1	0
AFUN000270	2521420	2522400	981	others	No	cDNA	AFUN000270	others	unspecified product	NA	No	AFUN000270	281.678	1.02111	0.250218	4.08088	4.48652e-05	4.34809	0.00024767	3.60613	x	AFUN000270	252.155	1.22476	0.666454	1.83773	0.0661028	1.17978	0.510616	0.291906		AFUN000270	289.326	-0.253216	0.301719	-0.839245	0.401332	0.396496	1	0
AFUN000271	2522749	2546135	23387	others	No	cDNA	AFUN000271	others	Chitin-binding type-2 domain-containing protein [Source:UniProtKB/TrEMBL;Acc:A0A182R281]	NA	No	AFUN000271	41.1167	-0.053786	0.417303	-0.12889	0.897445	0.0469921	0.93358	0.0298485		AFUN000271	46.5592	-0.355522	1.06303	-0.334443	0.738046	0.131917	0.984947	0.00658717		AFUN000271	37.4336	-0.425711	0.441946	-0.963265	0.335415	0.474418	1	0
AFUN000273	2684883	2688063	3181	others	No	cDNA	AFUN000273	others	unspecified product	NA	No	AFUN000273	92.9105	-0.408312	0.285053	-1.43241	0.152027	0.818079	0.251012	0.600305		AFUN000273	96.6834	-0.0951334	0.92412	-0.102945	0.918007	0.0371542	0.992254	0.00337732		AFUN000273	86.785	-0.541305	0.452633	-1.1959	0.231735	0.635009	1	0
AFUN000277	17918251	17987098	68848	others	No	cDNA	AFUN000277	others	pebble [Source:Projected from Anopheles gambiae (AGAP005796) VB Community Annotation]	NA	No	AFUN000277	341.449	1.18882	0.228685	5.19853	2.00866e-07	6.69709	1.9089e-06	5.71922	x	AFUN000277	207.162	0.593043	0.716845	0.827296	0.40807	0.389266	0.914471	0.03883		AFUN000277	317.151	0.46495	0.308443	1.50741	0.131706	0.880394	1	0
AFUN000278	17915140	17916652	1513	others	No	cDNA	AFUN000278	others	unspecified product	NA	No	AFUN000278	31.5219	0.0814869	0.319328	0.255182	0.798582	0.0976803	0.860473	0.0652626		AFUN000278	32.8923	0.639345	1.19847	0.533468	0.59371	0.226426	0.96493	0.0155044		AFUN000278	31.9101	-0.568751	0.42043	-1.35278	0.176125	0.754178	1	0
AFUN000279	17816264	17818469	2206	others	No	cDNA	AFUN000279	others	unspecified product	NA	No	AFUN000279	73.4072	-1.20687	0.810914	-1.48828	0.136676	0.864307	0.231353	0.635726		AFUN000279	54.7546	0.826584	0.985094	0.839091	0.401418	0.396403	0.912653	0.0396943		AFUN000279	71.1173	-0.701728	0.895502	-0.783614	0.433267	0.363245	1	0
AFUN000282	17766650	17769364	2715	others	No	cDNA	AFUN000282	others	DNA replication licensing factor MCM7 [Source:UniProtKB/TrEMBL;Acc:A0A182R292]	NA	No	AFUN000282	276.874	0.172388	0.306428	0.562572	0.573726	0.241295	0.679769	0.167639		AFUN000282	160.863	-0.525441	0.710133	-0.739919	0.459349	0.337857	0.929217	0.031883		AFUN000282	236.502	0.658001	0.365235	1.80158	0.0716116	1.14502	1	0
AFUN000283	17763290	17766315	3026	others	No	cDNA	AFUN000283	others	unspecified product	NA	No	AFUN000283	833.29	-0.547763	0.121612	-4.50418	6.66294e-06	5.17633	4.49467e-05	4.3473	x	AFUN000283	660.115	-0.573561	0.579639	-0.989514	0.322411	0.491589	0.87663	0.0571836		AFUN000283	718.328	-0.0304448	0.150356	-0.202485	0.839538	0.0759597	1	0
AFUN000284	17761195	17762648	1454	others	No	cDNA	RpL8	others	60S ribosomal protein L8	RpL8	No	AFUN000284	9399.98	-0.571607	0.156677	-3.64831	0.000263969	3.57845	0.00118253	2.92719	x	AFUN000284	6516.39	-0.416295	0.537372	-0.774687	0.438525	0.358006	0.924925	0.0338934		AFUN000284	8176.91	0.0872275	0.166919	0.522572	0.601272	0.220929	1	0
AFUN000287	17713192	17714343	1152	others	No	cDNA	AFUN000287	others	unspecified product	NA	No	AFUN000287	10.2271	1.90408	0.655887	2.90306	0.00369539	2.43234	0.0116859	1.93234	x	AFUN000287	8.11868	0.686251	2.12923	0.322301	0.747225	0.126549	0.984947	0.00658717		AFUN000287	9.90635	0.137851	0.629266	0.219067	0.826598	0.0827056	1	0
AFUN000288	17625558	17629393	3836	others	No	cDNA	AFUN000288	others	unspecified product	NA	No	AFUN000288	82.8206	-1.33411	0.535468	-2.49149	0.012721	1.89548	0.0331953	1.47892	x	AFUN000288	56.3394	-0.616795	0.992692	-0.621336	0.534378	0.272151	0.953929	0.0204837		AFUN000288	70.6671	-0.171103	0.642052	-0.266493	0.789859	0.10245	1	0
AFUN000289	17600606	17602925	2320	others	No	cDNA	AFUN000289	others	unspecified product	NA	No	AFUN000289	1.71198	-4.67129	2.58282	-1.8086	0.0705135	1.15173	0.136338	0.865384		AFUN000289	2.41337	-5.07279	4.42143	-1.14732	0.25125	0.599894	1	0		AFUN000289	0.546567	0	4.08048	0	1	0	1	0
AFUN000294	17363463	17367228	3766	others	No	cDNA	AFUN000294	others	protein phosphatase inhibitor [Source:Projected from Anopheles gambiae (AGAP005809) VB Community Annotation]	NA	No	AFUN000294	497.087	-0.520297	0.128988	-4.0337	5.49054e-05	4.26038	0.000295056	3.5301	x	AFUN000294	405.96	-0.137855	0.608184	-0.226666	0.820683	0.0858245	0.985365	0.00640266		AFUN000294	449.814	-0.232035	0.148728	-1.56013	0.118729	0.925443	1	0
AFUN000296	17354942	17355966	1025	others	No	cDNA	AFUN000296	others	unspecified product	NA	No	AFUN000296	87.9143	1.23812	0.318023	3.89316	9.89467e-05	4.0046	0.000496211	3.30433	x	AFUN000296	89.7639	1.21027	0.842487	1.43655	0.150847	0.821464	0.710185	0.148629		AFUN000296	92.7633	-0.399961	0.341059	-1.1727	0.240916	0.618135	1	0
AFUN000297	17353915	17354615	701	others	No	cDNA	AFUN000297	others	FeS cluster assembly scaffold IscU [Source:Projected from Anopheles gambiae (AGAP005813) VB Community Annotation]	NA	No	AFUN000297	948.35	-0.299665	0.449888	-0.666089	0.505354	0.296404	0.622018	0.206197		AFUN000297	668.002	-0.0856328	0.616591	-0.138881	0.889544	0.0508325	0.990097	0.00432229		AFUN000297	851.11	0.0509105	0.529832	0.0960881	0.923451	0.0345863	1	0
AFUN000298	17348937	17352709	3773	others	No	cDNA	AFUN000298	others	ecdysoneless homolog [Source:Projected from Anopheles gambiae (AGAP005814) VB Community Annotation]	NA	No	AFUN000298	696.579	-0.305461	0.195837	-1.55977	0.118815	0.925129	0.206937	0.684162		AFUN000298	451.694	-0.233075	0.607107	-0.383912	0.701044	0.154255	0.982577	0.00763328		AFUN000298	613.291	0.218653	0.220262	0.992695	0.320859	0.493686	1	0
AFUN000301	83266120	83268155	2036	others	No	cDNA	AFUN000301	others	unspecified product	NA	No	AFUN000301	786.561	-1.12024	0.198175	-5.65277	1.57882e-08	7.80167	1.81047e-07	6.74221	x	AFUN000301	579.445	-0.902396	0.586812	-1.53779	0.124099	0.906231	0.670578	0.173551		AFUN000301	652.41	-0.0456555	0.231235	-0.197442	0.843482	0.0739243	1	0
AFUN000302	83252399	83258812	6414	others	No	cDNA	AFUN000302	others	beta-adrenergic-receptor kinase [Source:Projected from Anopheles gambiae (AGAP012026) VB Community Annotation]	NA	No	AFUN000302	187.178	-0.452646	0.226476	-1.99865	0.0456461	1.3406	0.0955304	1.01986		AFUN000302	117.443	-0.720442	0.770999	-0.934426	0.350084	0.455828	0.884113	0.0534923		AFUN000302	157.608	0.402898	0.287377	1.40198	0.16092	0.79339	1	0
AFUN000303	83243315	83244018	704	others	No	cDNA	AFUN000303	others	RGS domain-containing protein [Source:UniProtKB/TrEMBL;Acc:A0A182R2B3]	NA	No	AFUN000303	29.3792	1.02499	0.360342	2.8445	0.00444817	2.35182	0.0136209	1.86579	x	AFUN000303	11.6692	-0.247959	1.79537	-0.138111	0.890153	0.0505353	0.990097	0.00432229		AFUN000303	25.1742	1.31392	0.503355	2.61033	0.00904544	2.04357	1	0
AFUN000304	83217647	83218411	765	others	No	cDNA	AFUN000304	others	RGS domain-containing protein [Source:UniProtKB/TrEMBL;Acc:A0A182R2B4]	NA	No	AFUN000304	2.61879	-0.500955	1.305	-0.383874	0.701072	0.154238	0.787033	0.104007		AFUN000304	2.73069	-0.151533	3.50888	-0.0431855	0.965554	0.0152236	0.996107	0.0016942		AFUN000304	2.43418	-0.544908	1.63838	-0.33259	0.739444	0.131095	1	0
AFUN000305	22164761	22169045	4285	others	No	cDNA	AFUN000305	others	U2-associated protein SR140 [Source:Projected from Anopheles gambiae (AGAP005006) VB Community Annotation]	NA	No	AFUN000305	298.058	-1.19199	0.176126	-6.76782	1.30739e-11	10.8836	2.43595e-10	9.61333	x	AFUN000305	196.907	-1.30423	0.684638	-1.90499	0.0567814	1.24579	0.469355	0.328498		AFUN000305	237.199	0.276475	0.223892	1.23486	0.216882	0.663776	1	0
AFUN000306	22162792	22164688	1897	others	No	cDNA	AFUN000306	others	kelch domain containing [Source:Projected from Anopheles gambiae (AGAP005007) VB Community Annotation]	NA	No	AFUN000306	341.42	-1.23075	0.179559	-6.85431	7.1658e-12	11.1447	1.38782e-10	9.85767	x	AFUN000306	211.739	-1.5577	0.696764	-2.23562	0.0253768	1.59556	0.281654	0.550284		AFUN000306	265.665	0.487422	0.251962	1.9345	0.0530512	1.2753	1	0
AFUN000309	22086807	22088515	1709	others	No	cDNA	AFUN000309	others	Pyrroline-5-carboxylate reductase [Source:UniProtKB/TrEMBL;Acc:A0A182R2B9]	NA	No	AFUN000309	279.401	1.86883	0.679077	2.75201	0.00592306	2.22745	0.0173306	1.76119	x	AFUN000309	166.018	1.28872	0.727113	1.77238	0.0763316	1.1173	0.549719	0.259859		AFUN000309	268.374	0.457798	0.782477	0.585062	0.558506	0.252972	1	0
AFUN000319	49754323	49756508	2186	IMPs	Yes	cDNA	AFUN000319	others	CLIP-domain serine protease [Source:Projected from Anopheles gambiae (AGAP002270) VB Community Annotation]	NA	No	AFUN000319	99.8129	0.327249	0.481522	0.679614	0.496749	0.303863	0.614759	0.211295		AFUN000319	98.9607	0.0933189	0.810064	0.115199	0.908287	0.0417768	0.991504	0.00370554		AFUN000319	94.6346	-0.293631	0.533689	-0.550192	0.582188	0.234937	1	0
AFUN000320	49743493	49744940	1448	others	No	cDNA	AFUN000320	others	unspecified product	NA	No	AFUN000320	52.6229	-0.964662	0.419196	-2.30122	0.0213792	1.67001	0.0511651	1.29103		AFUN000320	42.2526	-0.793919	1.09885	-0.722498	0.469988	0.327913	0.930455	0.0313047		AFUN000320	44.3149	-0.129967	0.551799	-0.235533	0.813795	0.0894848	1	0
AFUN000321	49732084	49742628	10545	others	No	cDNA	AFUN000321	others	unspecified product	NA	No	AFUN000321	1329.51	-0.364755	0.466774	-0.781438	0.434545	0.361965	0.558745	0.252787		AFUN000321	1179.03	-0.203023	0.571519	-0.355233	0.722415	0.141213	0.984947	0.00658717		AFUN000321	1204.11	-0.264633	0.542749	-0.487579	0.625848	0.203531	1	0
AFUN000322	49728263	49731063	2801	others	No	cDNA	AFUN000322	others	protein phosphatase 2C homolog 2/3 [Source:Projected from Anopheles gambiae (AGAP002266) VB Community Annotation]	NA	No	AFUN000322	323.52	-0.88701	0.156709	-5.66023	1.51168e-08	7.82054	1.73809e-07	6.75993	x	AFUN000322	263.062	-0.88699	0.656523	-1.35104	0.176682	0.752808	0.752152	0.123694		AFUN000322	269.079	-0.0845817	0.210701	-0.401429	0.688104	0.162346	1	0
AFUN000323	49725036	49727203	2168	others	No	cDNA	AFUN000323	others	splicing factor, arginine/serine-rich [Source:Projected from Anopheles gambiae (AGAP002265) VB Community Annotation]	NA	No	AFUN000323	803.217	0.618703	0.108616	5.69624	1.22479e-08	7.91194	1.44074e-07	6.84141	x	AFUN000323	551.935	0.483005	0.640297	0.754345	0.450642	0.346168	0.926043	0.0333687		AFUN000323	751.964	0.194762	0.226945	0.858189	0.390788	0.408059	1	0
AFUN000333	9572327	9579496	7170	others	No	cDNA	AFUN000333	others	heparosan-N-sulfate-glucuronate 5-epimerase [Source:Projected from Anopheles gambiae (AGAP005699) VB Community Annotation]	NA	No	AFUN000333	746.266	0.180989	0.147186	1.22966	0.218826	0.659902	0.333367	0.477077		AFUN000333	514.511	0.204924	0.592819	0.345677	0.729585	0.136924	0.984947	0.00658717		AFUN000333	684.729	0.152641	0.165607	0.921707	0.356681	0.44772	1	0
AFUN000334	9579866	9585709	5844	others	No	cDNA	Med14	others	mediator of RNA polymerase II transcription subunit 14	Med14	No	AFUN000334	930.583	1.03251	0.172935	5.9705	2.36534e-09	8.62611	3.12838e-08	7.50468	x	AFUN000334	748.965	0.974037	0.627864	1.55135	0.120818	0.91787	0.664072	0.177785		AFUN000334	921.909	-0.05416	0.26518	-0.204239	0.838167	0.0766694	1	0
AFUN000335	9585730	9599091	13362	others	No	cDNA	AFUN000335	others	unspecified product	NA	No	AFUN000335	454.097	-0.767387	0.147297	-5.20978	1.89065e-07	6.72339	1.80481e-06	5.74357	x	AFUN000335	376.612	-0.868234	0.623715	-1.39204	0.163912	0.78539	0.735266	0.133556		AFUN000335	378.686	-0.0654774	0.188054	-0.348183	0.727703	0.138046	1	0
AFUN000336	9599528	9609340	9813	others	No	cDNA	AFUN000336	others	cyclin T [Source:Projected from Anopheles gambiae (AGAP006678) VB Community Annotation]	NA	No	AFUN000336	3379.01	0.522006	0.139286	3.74773	0.000178441	3.7485	0.000835147	3.07824	x	AFUN000336	2407.47	0.61079	0.599099	1.01951	0.307959	0.511507	0.864139	0.0634165		AFUN000336	3206.86	0.0889825	0.236197	0.37673	0.706374	0.150965	1	0
AFUN000337	9609819	9613810	3992	others	No	cDNA	AFUN000337	others	unspecified product	NA	No	AFUN000337	548.993	-0.28626	0.158938	-1.80108	0.0716899	1.14454	0.138152	0.859644		AFUN000337	424.615	-0.198603	0.649204	-0.305918	0.759667	0.119377	0.985365	0.00640266		AFUN000337	491.37	-0.0433749	0.254143	-0.170672	0.864482	0.0632441	1	0
AFUN000338	9610544	9611534	991	others	No	cDNA	AFUN000338	others	unspecified product	NA	No	AFUN000338	4.73106	-0.564464	0.975796	-0.578465	0.56295	0.24953	0.67105	0.173245		AFUN000338	6.74405	0.854129	2.38555	0.358044	0.720311	0.14248	0.984947	0.00658717		AFUN000338	5.25201	-1.29661	1.18601	-1.09326	0.274279	0.561807	1	0
AFUN000339	9614014	9618661	4648	others	No	cDNA	AFUN000339	others	unspecified product	NA	No	AFUN000339	2302.72	-0.610633	0.206677	-2.95454	0.0031314	2.50426	0.0101462	1.9937	x	AFUN000339	1980.76	-0.120096	0.557875	-0.215273	0.829554	0.0811552	0.985365	0.00640266		AFUN000339	2098.21	-0.352212	0.249671	-1.41071	0.158331	0.800433	1	0
AFUN000343	9644070	9645799	1730	others	No	cDNA	AFUN000343	others	vacuolar fusion protein CCZ1 homolog [Source:Projected from Anopheles gambiae (AGAP006687) VB Community Annotation]	NA	No	AFUN000343	157.208	0.817457	0.205537	3.97718	6.9737e-05	4.15654	0.000363881	3.43904	x	AFUN000343	126.772	1.37047	0.776195	1.76563	0.0774575	1.11094	0.552155	0.257939		AFUN000343	159.542	-0.161912	0.242477	-0.667741	0.504299	0.297312	1	0
AFUN000344	9645908	9647043	1136	others	No	cDNA	AFUN000344	others	signal recognition particle receptor subunit beta [Source:Projected from Anopheles gambiae (AGAP006688) VB Community Annotation]	NA	No	AFUN000344	247.016	0.133464	0.170697	0.781875	0.434288	0.362222	0.55847	0.253		AFUN000344	197.931	0.0423485	0.680913	0.0621936	0.950409	0.0220896	0.99461	0.00234729		AFUN000344	227.135	-0.0271448	0.206155	-0.131671	0.895244	0.0480585	1	0
AFUN000348	9732924	9734310	1387	others	No	cDNA	AFUN000348	others	unspecified product	NA	No	AFUN000348	1.2742	-2.1771	1.52311	-1.42938	0.152895	0.815606	0.252184	0.598282		AFUN000348	0.555442	-0.392291	5.93515	-0.0660961	0.947301	0.0235119	1	0		AFUN000348	1.0713	-0.34506	2.24537	-0.153676	0.877865	0.0565723	1	0
AFUN000349	9737279	9738191	913	others	No	cDNA	AFUN000349	others	unspecified product	NA	No	AFUN000349	54.4673	-1.83828	0.623936	-2.94627	0.00321637	2.49263	0.0103873	1.9835	x	AFUN000349	39.6214	-2.44164	1.10181	-2.21603	0.0266896	1.57366	0.291687	0.535083		AFUN000349	38.1682	0.499008	0.781174	0.638792	0.522958	0.281533	1	0
AFUN000350	9746832	9750651	3820	others	No	cDNA	AFUN000350	others	hairy and enhancer of split, invertebrate [Source:Projected from Anopheles gambiae (AGAP006699) VB Community Annotation]	NA	No	AFUN000350	1935.9	0.163604	0.248874	0.657378	0.510938	0.291632	0.626968	0.202754		AFUN000350	1213.53	-0.304389	0.580645	-0.524225	0.600122	0.221761	0.967343	0.0144194		AFUN000350	1690.84	0.457568	0.308758	1.48197	0.13835	0.859022	1	0
AFUN000351	9788171	9790898	2728	COEs	Yes	cDNA	AFUN000351	COEs	carboxylesterase alpha esterase [Source:Projected from Anopheles gambiae (AGAP006700) VB Community Annotation]	NA	Yes	AFUN000351	2.90581	-3.81392	1.18687	-3.21343	0.00131162	2.88219	0.00474496	2.32377	x	AFUN000351	2.96881	-3.84062	3.75255	-1.02347	0.306087	0.514156	0.863216	0.0638806		AFUN000351	1.55139	-0.42949	2.09046	-0.205453	0.837219	0.0771612	1	0
AFUN000354	9878094	9888853	10760	others	No	cDNA	AFUN000354	others	SAM domain-containing protein [Source:UniProtKB/TrEMBL;Acc:A0A182R2G4]	NA	No	AFUN000354	5254.66	0.96895	0.235571	4.11319	3.90228e-05	4.40868	0.000219018	3.65952	x	AFUN000354	3251.07	0.912342	0.624002	1.46208	0.143719	0.842485	0.703972	0.152444		AFUN000354	4983.28	0.327264	0.332399	0.984551	0.324845	0.488324	1	0
AFUN000355	9889384	9891356	1973	others	No	cDNA	AFUN000355	others	amiloride-sensitive sodium channel [Source:Projected from Anopheles gambiae (AGAP006703) VB Community Annotation]	NA	No	AFUN000355	1.04786	-3.32438	1.88486	-1.76373	0.0777775	1.10915	0.147281	0.831853		AFUN000355	0.241337	-1.75094	5.94809	-0.294371	0.768474	0.114371	1	0		AFUN000355	0.774288	0.00707044	3.40136	0.00207871	0.998341	0.000720906	1	0
AFUN000356	9891951	9894031	2081	others	No	cDNA	AFUN000356	others	amiloride-sensitive sodium channel [Source:Projected from Anopheles gambiae (AGAP006704) VB Community Annotation]	NA	No	AFUN000356	2.95072	-1.30609	1.4164	-0.922121	0.356465	0.447983	0.480267	0.318518		AFUN000356	1.42499	-0.00542269	5.10424	-0.00106239	0.999152	0.000368292	1	0		AFUN000356	2.58489	0.0163495	1.9324	0.00846069	0.993249	0.00294168	1	0
AFUN000357	9894056	9906149	12094	others	No	cDNA	AFUN000357	others	ZP domain-containing protein [Source:UniProtKB/TrEMBL;Acc:A0A182R2G7]	NA	No	AFUN000357	27.3769	-0.284559	0.442358	-0.643278	0.520044	0.28396	0.634422	0.197622		AFUN000357	30.6095	-0.333226	1.19676	-0.278439	0.780675	0.10753	0.985365	0.00640266		AFUN000357	24.941	-0.515056	0.486754	-1.05814	0.28999	0.537617	1	0
AFUN000358	9909137	9910175	1039	others	No	cDNA	AFUN000358	others	unspecified product	NA	No	AFUN000358	0.644674	-2.42112	2.75236	-0.879651	0.379048	0.421306	0.503098	0.298347		AFUN000358	0	NA	NA	NA	NA	#VALUE!	1	0		AFUN000358	0.529189	0.00707275	3.89336	0.00181662	0.998551	0.000629945	1	0
AFUN000360	9920554	9921600	1047	others	No	cDNA	Gr28	others	gustatory receptor	Gr28	No	AFUN000360	4.03289	-1.61402	1.38117	-1.16858	0.242571	0.615161	0.361379	0.442037		AFUN000360	3.8405	-1.01624	2.95649	-0.343731	0.731049	0.136054	0.984947	0.00658717		AFUN000360	3.30339	-0.649647	1.71487	-0.378831	0.704814	0.151926	1	0
AFUN000362	9925951	9930631	4681	others	No	cDNA	AFUN000362	others	unspecified product	NA	No	AFUN000362	1643.67	-0.023414	0.161116	-0.145323	0.884456	0.0533239	0.924211	0.0342291		AFUN000362	1201.93	-0.243034	0.591891	-0.410606	0.681362	0.166622	0.982503	0.00766594		AFUN000362	1458.57	0.15079	0.234911	0.641903	0.520936	0.283215	1	0
AFUN000365	9943347	9948449	5103	others	No	cDNA	AFUN000365	others	unspecified product	NA	No	AFUN000365	1.43992	-3.78584	2.22767	-1.69947	0.0892313	1.04948	0.164599	0.783573		AFUN000365	1.44802	-4.33578	5.54582	-0.781811	0.434326	0.362184	1	0		AFUN000365	0.666803	0.00707633	4.08048	0.00173419	0.998616	0.000601342	1	0
AFUN000369	9993520	9994226	707	others	No	cDNA	AFUN000369	others	cecropin anti-microbial peptide [Source:Projected from Anopheles gambiae (AGAP006722) VB Community Annotation]	NA	No	AFUN000369	1.64826	-2.37337	1.35225	-1.75513	0.0792362	1.10108	0.149555	0.825199		AFUN000369	0.796779	-1.39224	5.84685	-0.238118	0.81179	0.0905564	1	0		AFUN000369	1.29235	-0.0691068	2.14467	-0.0322225	0.974295	0.0113097	1	0
AFUN000373	10054665	10057222	2558	COEs	Yes	cDNA	AFUN000373	COEs	carboxylesterase [Source:Projected from Anopheles gambiae (AGAP006727) VB Community Annotation]	NA	Yes	AFUN000373	159.335	0.295562	0.154204	1.91669	0.0552773	1.25745	0.11156	0.952492		AFUN000373	124.655	0.128378	0.758478	0.169257	0.865594	0.0626856	0.988212	0.00514969		AFUN000373	147.305	0.0368642	0.195922	0.188158	0.850753	0.0701966	1	0
AFUN000374	10060047	10061320	1274	others	No	cDNA	AFUN000374	others	Ester hydrolase C11orf54 [Source:Projected from Anopheles gambiae (AGAP006729) VB Community Annotation]	NA	No	AFUN000374	536.945	1.10355	0.172929	6.38152	1.75343e-10	9.75611	2.75944e-09	8.55918	x	AFUN000374	384.625	0.845961	0.622779	1.35836	0.174348	0.758583	0.747678	0.126285		AFUN000374	517.942	0.153403	0.213958	0.716975	0.47339	0.324781	1	0
AFUN000375	10062628	10066870	4243	others	No	cDNA	AFUN000375	others	RING-type domain-containing protein [Source:UniProtKB/TrEMBL;Acc:A0A182R2I4]	NA	No	AFUN000375	347.604	0.537868	0.226013	2.37981	0.0173215	1.76141	0.0428689	1.36786	x	AFUN000375	256.754	1.22937	0.652071	1.88534	0.0593841	1.22633	0.48205	0.316908		AFUN000375	344.5	-0.0879918	0.189559	-0.464191	0.642511	0.19212	1	0
AFUN000379	69511071	69519613	8543	others	No	cDNA	AFUN000379	others	Trafficking kinesin-binding protein [Source:Projected from Anopheles gambiae (AGAP029585) UniProtKB/TrEMBL;Acc:A0A453Z048]	NA	No	AFUN000379	3443.6	0.377194	0.116241	3.24494	0.00117476	2.93005	0.00430598	2.36593	x	AFUN000379	2566.13	0.535845	0.56388	0.950283	0.341969	0.466014	0.881836	0.054612		AFUN000379	3270.83	0.00403982	0.169392	0.0238489	0.980973	0.00834289	1	0
AFUN000380	69520847	69522820	1974	others	No	cDNA	Pgk	others	Phosphoglycerate kinase [Source:UniProtKB/TrEMBL;Acc:A0A182R2I9]	Pgk	No	AFUN000380	2353.73	-1.76398	0.456874	-3.86098	0.000112934	3.94717	0.000558892	3.25267	x	AFUN000380	2397.78	-2.37002	0.587276	-4.03561	5.44609e-05	4.26392	0.00191526	2.71777	x	AFUN000380	1554.08	0.00650729	0.503717	0.0129185	0.989693	0.00449959	1	0
AFUN000383	69495816	69497455	1640	others	No	cDNA	AFUN000383	others	peroxin [Source:Projected from Anopheles gambiae (AGAP008804) VB Community Annotation]	NA	No	AFUN000383	250.408	-0.617607	0.199609	-3.09408	0.00197426	2.70459	0.00674813	2.17082	x	AFUN000383	197.694	-0.560812	0.691519	-0.810986	0.417374	0.379475	0.919099	0.0366377		AFUN000383	216.067	-0.0661302	0.260042	-0.254306	0.799259	0.0973122	1	0
AFUN000389	99391083	99422641	31559	others	No	cDNA	AFUN000389	others	unspecified product	NA	No	AFUN000389	2286.81	-0.381418	0.1177	-3.24061	0.00119275	2.92345	0.00436208	2.36031	x	AFUN000389	1652.62	-0.30758	0.561737	-0.547552	0.584	0.233587	0.963704	0.0160563		AFUN000389	2015.1	0.0612043	0.157363	0.388938	0.697322	0.156566	1	0
AFUN000390	99376613	99390321	13709	others	No	cDNA	AFUN000390	others	FMS-like tyrosine kinase [Source:Projected from Anopheles gambiae (AGAP008813) VB Community Annotation]	NA	No	AFUN000390	2293.21	-0.309027	0.238196	-1.29736	0.194506	0.711066	0.305386	0.51515		AFUN000390	1925.36	-0.477272	0.655764	-0.72781	0.46673	0.330935	0.930455	0.0313047		AFUN000390	2004.52	-0.0582415	0.359206	-0.16214	0.871196	0.0598842	1	0
AFUN000391	43460947	43461529	583	others	No	cDNA	AFUN000391	others	Chitin-binding type-2 domain-containing protein [Source:UniProtKB/TrEMBL;Acc:A0A182R2K0]	NA	No	AFUN000391	0.104627	-0.519413	3.53382	-0.146983	0.883145	0.0539679	1	0		AFUN000391	0.241337	-1.75094	5.94809	-0.294371	0.768474	0.114371	1	0		AFUN000391	0	NA	NA	NA	NA	#VALUE!	1	0
AFUN000392	43452924	43454366	1443	others	No	cDNA	AFUN000392	others	chitinase [Source:Projected from Anopheles gambiae (AGAP005337) VB Community Annotation]	NA	No	AFUN000392	4.85186	0.771014	1.07638	0.716305	0.473803	0.324402	0.594022	0.226197		AFUN000392	3.77202	2.85546	3.29244	0.867277	0.38579	0.413649	0.901945	0.0448199		AFUN000392	5.15139	-0.238629	1.21652	-0.196156	0.844488	0.0734065	1	0
AFUN000393	43450604	43452609	2006	others	No	cDNA	AFUN000393	others	unspecified product	NA	No	AFUN000393	0.966426	0.270233	1.88784	0.143144	0.886176	0.0524799	0.925175	0.033776		AFUN000393	0.796779	-1.39224	5.84685	-0.238118	0.81179	0.0905564	1	0		AFUN000393	0.732348	0.504412	2.62421	0.192215	0.847574	0.0718223	1	0
AFUN000394	43446013	43446939	927	others	No	cDNA	AFUN000394	others	unspecified product	NA	No	AFUN000394	510.736	-1.57933	0.354149	-4.45951	8.21491e-06	5.0854	5.44376e-05	4.2641	x	AFUN000394	364.665	-0.628481	0.700113	-0.897684	0.369354	0.432557	0.892681	0.0493037		AFUN000394	435.897	-0.381919	0.437982	-0.871997	0.38321	0.416563	1	0
AFUN000395	43426155	43441837	15683	others	No	cDNA	AFUN000395	others	myotubularin related protein [Source:Projected from Anopheles gambiae (AGAP005341) VB Community Annotation]	NA	No	AFUN000395	890.92	0.380464	0.177701	2.14103	0.0322712	1.49118	0.0718183	1.14377		AFUN000395	729.527	0.508275	0.589184	0.862676	0.388316	0.410815	0.902944	0.0443393		AFUN000395	855.775	-0.121873	0.227917	-0.534724	0.592841	0.227062	1	0
AFUN000397	43417993	43419477	1485	others	No	cDNA	AFUN000397	others	Vacuolar protein sorting-associated protein 28 homolog [Source:UniProtKB/TrEMBL;Acc:A0A182R2K6]	NA	No	AFUN000397	273.45	-0.916426	0.209926	-4.36546	1.26854e-05	4.89669	8.03096e-05	4.09523	x	AFUN000397	253.795	-0.575441	0.650057	-0.885217	0.37604	0.424766	0.897125	0.0471472		AFUN000397	237.592	-0.425469	0.253529	-1.67819	0.09331	1.03007	1	0
AFUN000398	43372827	43381915	9089	others	No	cDNA	AFUN000398	others	unspecified product	NA	No	AFUN000398	589.298	-0.0616015	0.287352	-0.214376	0.830254	0.0807893	0.88474	0.0531846		AFUN000398	535.803	0.117612	0.618501	0.190157	0.849186	0.0709969	0.985937	0.0061508		AFUN000398	554.123	-0.297455	0.353341	-0.841835	0.39988	0.39807	1	0
AFUN000399	43357092	43360370	3279	others	No	cDNA	AFUN000399	others	unspecified product	NA	No	AFUN000399	6.12961	-1.22471	1.08467	-1.12911	0.25885	0.586951	0.37917	0.421166		AFUN000399	2.80024	-2.72121	3.77404	-0.721034	0.470889	0.327082	0.930455	0.0313047		AFUN000399	4.47628	1.66205	1.73828	0.956147	0.338998	0.469803	1	0
AFUN000400	43349507	43353443	3937	others	No	cDNA	AFUN000400	others	alpha-1,3-mannosyl-glycoprotein beta-1,2-N-acetylglucosaminyltransferase [Source:Projected from Anopheles gambiae (AGAP005347) VB Community Annotation]	NA	No	AFUN000400	411.189	-0.0151572	0.151608	-0.0999761	0.920363	0.0360407	0.948377	0.023019		AFUN000400	353.904	0.0353158	0.621914	0.0567856	0.954716	0.0201258	0.995518	0.00195091		AFUN000400	380.73	-0.180691	0.181934	-0.99317	0.320627	0.494	1	0
AFUN000401	43347546	43349186	1641	others	No	cDNA	AFUN000401	others	unspecified product	NA	No	AFUN000401	51.7758	0.377166	0.499604	0.75493	0.450291	0.346507	0.5732	0.241694		AFUN000401	52.5861	0.423254	1.014	0.41741	0.676379	0.16981	0.982503	0.00766594		AFUN000401	51.0834	-0.408961	0.589105	-0.694208	0.487552	0.311979	1	0
AFUN000402	43320108	43323471	3364	others	No	cDNA	AFUN000402	others	unspecified product	NA	No	AFUN000402	31.452	0.0852004	0.629693	0.135305	0.892371	0.0494545	0.92959	0.0317088		AFUN000402	17.708	-0.718571	1.51672	-0.473767	0.635666	0.196771	0.972766	0.0119916		AFUN000402	26.4474	0.772351	0.787546	0.980706	0.326738	0.485801	1	0
AFUN000403	43295126	43343592	48467	others	No	cDNA	AFUN000403	others	ZP domain-containing protein [Source:UniProtKB/TrEMBL;Acc:A0A182R2L2]	NA	No	AFUN000403	583.818	-0.778829	0.233509	-3.33533	0.000851974	3.06957	0.00326343	2.48633	x	AFUN000403	496.821	-0.961933	0.639875	-1.50331	0.132758	0.876938	0.684371	0.164708		AFUN000403	481.575	-0.0544319	0.306966	-0.177322	0.859255	0.0658778	1	0
AFUN000404	43288814	43295086	6273	others	No	cDNA	AFUN000404	others	DEAD box polypeptide [Source:Projected from Anopheles gambiae (AGAP005351) VB Community Annotation]	NA	No	AFUN000404	402.666	-0.0964093	0.134495	-0.716824	0.473483	0.324696	0.59383	0.226338		AFUN000404	307.149	-0.357408	0.631601	-0.565876	0.571478	0.243	0.96314	0.0163106		AFUN000404	354.396	0.106639	0.158267	0.673795	0.500441	0.300647	1	0
AFUN000406	43269769	43288258	18490	others	No	cDNA	AFUN000406	others	tyrosine-protein phosphatase non-receptor type [Source:Projected from Anopheles gambiae (AGAP005352) VB Community Annotation]	NA	No	AFUN000406	2004.6	-0.104023	0.142235	-0.731343	0.46457	0.332949	0.586479	0.231748		AFUN000406	1500.37	0.0522117	0.574551	0.090874	0.927593	0.0326427	0.993662	0.00276132		AFUN000406	1831.5	-0.0129823	0.197669	-0.0656768	0.947635	0.0233589	1	0
AFUN000407	43266675	43267213	539	others	No	cDNA	AFUN000407	others	unspecified product	NA	No	AFUN000407	15.025	-1.20311	0.544035	-2.21145	0.0270045	1.56856	0.0620111	1.20753		AFUN000407	13.0685	-1.0042	1.73025	-0.580381	0.561658	0.250528	0.960087	0.0176896		AFUN000407	12.3417	-0.245794	0.737158	-0.333434	0.738807	0.131469	1	0
AFUN000408	43266010	43266669	660	others	No	cDNA	AFUN000408	others	biogenesis of lysosome-related organelles complex 1 subunit [Source:Projected from Anopheles gambiae (AGAP005353) VB Community Annotation]	NA	No	AFUN000408	20.971	-0.0814854	0.517313	-0.157517	0.874838	0.0580725	0.91739	0.037446		AFUN000408	20.5125	-0.42506	1.43444	-0.296324	0.766982	0.115215	0.985365	0.00640266		AFUN000408	18.6733	-0.198569	0.621574	-0.319462	0.749376	0.1253	1	0
AFUN000411	43163962	43198815	34854	others	No	cDNA	AFUN000411	others	predicted G-protein coupled receptor GPCR [Source:Projected from Anopheles gambiae (AGAP005356) VB Community Annotation]	NA	No	AFUN000411	294.435	-0.32537	0.246039	-1.32243	0.186025	0.730429	0.294544	0.53085		AFUN000411	213.842	-0.346318	0.690278	-0.501708	0.615873	0.210509	0.969848	0.0132962		AFUN000411	258.642	0.0967278	0.313573	0.30847	0.757725	0.120489	1	0
AFUN000413	43115925	43117711	1787	others	No	cDNA	AFUN000413	others	PQ loop repeat-containing protein [Source:Projected from Anopheles gambiae (AGAP005360) VB Community Annotation]	NA	No	AFUN000413	119.212	-0.578458	0.281274	-2.05656	0.0397281	1.4009	0.0852042	1.06954		AFUN000413	114.673	-0.279245	0.828485	-0.337055	0.736076	0.133077	0.984947	0.00658717		AFUN000413	107.905	-0.432774	0.392608	-1.1023	0.270329	0.568107	1	0
AFUN000414	43105566	43110492	4927	others	No	cDNA	AFUN000414	others	NF-X1-type zinc finger protein NFXL1 [Source:Projected from Anopheles gambiae (AGAP005362) VB Community Annotation]	NA	No	AFUN000414	379.568	1.07014	0.181996	5.88004	4.10163e-09	8.38704	5.21925e-08	7.28239	x	AFUN000414	221.013	0.896385	0.672477	1.33296	0.182545	0.73863	0.759719	0.119347		AFUN000414	356.825	0.434012	0.205415	2.11285	0.0346133	1.46076	1	0
AFUN000415	43104164	43105463	1300	others	No	cDNA	AFUN000415	others	unspecified product	NA	No	AFUN000415	65.0526	0.319183	0.410869	0.776847	0.437249	0.359271	0.561203	0.25088		AFUN000415	48.4197	-0.199214	1.02343	-0.194653	0.845664	0.0728019	0.985614	0.00629311		AFUN000415	58.0761	0.223582	0.495164	0.451531	0.651607	0.186014	1	0
AFUN000416	43100460	43103872	3413	others	No	cDNA	AFUN000416	others	protein BAT5 [Source:Projected from Anopheles gambiae (AGAP005364) VB Community Annotation]	NA	No	AFUN000416	749.899	-0.376982	0.115832	-3.25456	0.00113567	2.94475	0.00417961	2.37886	x	AFUN000416	596.462	-0.296511	0.593922	-0.499243	0.617608	0.209287	0.969848	0.0132962		AFUN000416	666.228	-0.0745836	0.165504	-0.450645	0.652245	0.185589	1	0
AFUN000417	43098892	43100407	1516	others	No	cDNA	AFUN000417	others	ribosome biogenesis protein BRX1 [Source:Projected from Anopheles gambiae (AGAP005365) VB Community Annotation]	NA	No	AFUN000417	1040.05	-0.577614	0.0825592	-6.99636	2.62689e-12	11.5806	5.48724e-11	10.2606	x	AFUN000417	825.49	-0.417855	0.573709	-0.72834	0.466406	0.331236	0.930455	0.0313047		AFUN000417	911.933	-0.113481	0.117569	-0.965231	0.334429	0.475696	1	0
AFUN000418	43091786	43098433	6648	others	No	cDNA	AFUN000418	others	serine/arginine repetitive matrix protein [Source:Projected from Anopheles gambiae (AGAP005366) VB Community Annotation]	NA	No	AFUN000418	1539.81	-0.220367	0.164762	-1.33749	0.181064	0.742169	0.288144	0.54039		AFUN000418	1084.17	0.0593983	0.579937	0.102422	0.918422	0.0369579	0.992254	0.00337732		AFUN000418	1399.11	0.0305632	0.193774	0.157726	0.874673	0.0581545	1	0
AFUN000419	43067476	43090914	23439	others	No	cDNA	AFUN000419	others	unspecified product	NA	No	AFUN000419	18.2656	-0.809719	0.652959	-1.24008	0.214948	0.667667	0.329021	0.482777		AFUN000419	13.1327	-2.71521	1.83274	-1.4815	0.138474	0.858633	0.693609	0.158885		AFUN000419	12.4523	1.24506	0.938765	1.32627	0.184749	0.733418	1	0
AFUN000420	43056679	43059886	3208	others	No	cDNA	AFUN000420	others	unspecified product	NA	No	AFUN000420	4249.22	-0.0706096	0.16754	-0.42145	0.673427	0.17171	0.76556	0.116021		AFUN000420	3097.72	-0.113759	0.599342	-0.189807	0.84946	0.0708568	0.985937	0.0061508		AFUN000420	3815.35	0.0936897	0.265832	0.35244	0.724508	0.139957	1	0
AFUN000421	43053848	43055741	1894	COEs	Yes	cDNA	AFUN000421	COEs	carboxylesterase beta esterase [Source:Projected from Anopheles gambiae (AGAP005370) VB Community Annotation]	NA	Yes	AFUN000421	3.97311	0.0860533	1.38763	0.0620147	0.950551	0.0220245	0.967686	0.0142654		AFUN000421	5.17076	0.723456	2.61002	0.277184	0.781639	0.106994	0.985365	0.00640266		AFUN000421	4.24194	-0.943584	1.55667	-0.606155	0.544412	0.264072	1	0
AFUN000423	43040685	43055997	15313	others	No	cDNA	AFUN000423	others	BRCT domain-containing protein [Source:UniProtKB/TrEMBL;Acc:A0A182R2N2]	NA	No	AFUN000423	993.67	0.148726	0.236772	0.62814	0.529912	0.275796	0.642603	0.192058		AFUN000423	684.989	0.399397	0.586691	0.680762	0.496022	0.304499	0.941598	0.0261347		AFUN000423	925.356	0.0866624	0.266208	0.325544	0.74477	0.127978	1	0
AFUN000424	43038878	43040570	1693	others	No	cDNA	AFUN000424	others	60S ribosomal export protein NMD3 [Source:UniProtKB/TrEMBL;Acc:A0A182R2N3]	NA	No	AFUN000424	648.762	-0.496532	0.100449	-4.94312	7.68827e-07	6.11417	6.4812e-06	5.18834	x	AFUN000424	496.911	-0.444461	0.604429	-0.735339	0.462133	0.335233	0.929766	0.0316263		AFUN000424	565.958	-0.019505	0.151609	-0.128653	0.897632	0.0469015	1	0
AFUN000425	43036955	43038806	1852	others	No	cDNA	AFUN000425	others	unspecified product	NA	No	AFUN000425	768.845	0.401467	0.151276	2.65387	0.00795749	2.09922	0.0222679	1.65232	x	AFUN000425	582.185	0.383456	0.700998	0.547014	0.584369	0.233313	0.963704	0.0160563		AFUN000425	723.161	0.0267532	0.327041	0.0818037	0.934803	0.02928	1	0
AFUN000426	42950150	43034477	84328	others	No	cDNA	AFUN000426	others	unspecified product	NA	No	AFUN000426	2260.16	-0.287356	0.138834	-2.06978	0.038473	1.41484	0.0828744	1.08158		AFUN000426	1941.09	-0.139061	0.547727	-0.253887	0.799583	0.0971364	0.985365	0.00640266		AFUN000426	2055.1	-0.212177	0.164927	-1.2865	0.19827	0.702743	1	0
AFUN000427	42941645	42942519	875	others	No	cDNA	AFUN000427	others	unspecified product	NA	No	AFUN000427	36.1764	0.185462	0.396231	0.468064	0.639739	0.193997	0.737178	0.132428		AFUN000427	35.4265	0.729402	1.13692	0.641561	0.521158	0.28303	0.950473	0.0220604		AFUN000427	36.4514	-0.486471	0.464818	-1.04658	0.295291	0.52975	1	0
AFUN000428	42940000	42941377	1378	others	No	cDNA	AFUN000428	others	unspecified product	NA	No	AFUN000428	335.565	1.37366	0.206427	6.65444	2.8438e-11	10.5461	5.09053e-10	9.29324	x	AFUN000428	279.811	1.68498	0.646209	2.60748	0.00912103	2.03996	0.139318	0.855992		AFUN000428	348.206	-0.160061	0.23517	-0.680618	0.496113	0.304419	1	0
AFUN000429	42936717	42939978	3262	others	No	cDNA	AFUN000429	others	Beta-hexosaminidase [Source:UniProtKB/TrEMBL;Acc:A0A182R2N8]	NA	No	AFUN000429	351.314	-0.203435	0.199252	-1.02099	0.307257	0.512498	0.430984	0.365539		AFUN000429	224.061	-0.422133	0.69953	-0.603452	0.546208	0.262642	0.95534	0.0198421		AFUN000429	304.165	0.362137	0.280652	1.29034	0.196932	0.705683	1	0
AFUN000430	42933240	42936585	3346	others	No	cDNA	AFUN000430	others	Transcription initiation factor IIE subunit beta [Source:UniProtKB/TrEMBL;Acc:A0A182R2N9]	NA	No	AFUN000430	305.154	-0.648715	0.260529	-2.48999	0.0127747	1.89365	0.0333217	1.47727	x	AFUN000430	200.977	-0.181765	0.706384	-0.257318	0.796933	0.0985779	0.985365	0.00640266		AFUN000430	270.246	0.0447133	0.30086	0.148618	0.881855	0.0546029	1	0
AFUN000432	42926075	42927223	1149	others	No	cDNA	AFUN000432	others	CRAL-TRIO domain-containing protein [Source:UniProtKB/TrEMBL;Acc:A0A182R2P1]	NA	No	AFUN000432	3.352	-0.991558	0.880153	-1.12657	0.259922	0.585156	0.38026	0.419919		AFUN000432	2.94578	-1.38693	3.67725	-0.377166	0.70605	0.151164	0.982577	0.00763328		AFUN000432	2.59652	-0.107964	1.32942	-0.0812117	0.935274	0.0290613	1	0
AFUN000433	42918529	42919966	1438	IMPs	Yes	cDNA	AFUN000433	others	cellular retinaldehyde binding protein [Source:Projected from Anopheles gambiae (AGAP005387) VB Community Annotation]	NA	No	AFUN000433	57.7694	-1.00106	0.467837	-2.13976	0.032374	1.4898	0.0719592	1.14291		AFUN000433	40.6349	-0.692772	1.10656	-0.62606	0.531275	0.27468	0.952917	0.0209447		AFUN000433	48.9835	-0.00180448	0.589713	-0.00305993	0.997559	0.00106161	1	0
AFUN000434	42911241	42912491	1251	others	No	cDNA	AFUN000434	others	unspecified product	NA	No	AFUN000434	2.69935	-0.725026	1.08503	-0.668207	0.504002	0.297568	0.621204	0.206766		AFUN000434	3.50122	-1.26027	3.41766	-0.368751	0.712313	0.147329	0.983533	0.00721112		AFUN000434	2.08609	-0.551089	1.46941	-0.375041	0.70763	0.150194	1	0
AFUN000436	42857942	42862756	4815	others	No	cDNA	AFUN000436	others	ATP-dependent RNA helicase DDX20 [Source:Projected from Anopheles gambiae (AGAP005391) VB Community Annotation]	NA	No	AFUN000436	735.089	0.151177	0.137002	1.10347	0.269823	0.568921	0.391603	0.407154		AFUN000436	541.025	0.0215338	0.593459	0.0362852	0.971055	0.0127562	0.997029	0.00129223		AFUN000436	668.649	0.104406	0.172351	0.605776	0.544664	0.263871	1	0
AFUN000437	42855303	42857795	2493	others	No	cDNA	AFUN000437	others	Post-GPI attachment to proteins factor 3 [Source:UniProtKB/TrEMBL;Acc:A0A182R2P6]	NA	No	AFUN000437	164.91	0.787873	0.26614	2.96037	0.00307267	2.51248	0.00998385	2.0007	x	AFUN000437	123.287	0.827989	0.819359	1.01053	0.31224	0.505511	0.86717	0.0618956		AFUN000437	159.98	0.0413635	0.372294	0.111104	0.911534	0.0402273	1	0
AFUN000438	42849677	42855056	5380	others	No	cDNA	AFUN000438	others	Ras-related protein Rab-2A [Source:Projected from Anopheles gambiae (AGAP005393) VB Community Annotation]	NA	No	AFUN000438	2473.98	-1.36986	0.155266	-8.82266	1.11768e-18	17.9517	5.45274e-17	16.2634	x	AFUN000438	1811.48	-1.20362	0.557216	-2.16006	0.030768	1.5119	0.321245	0.493163		AFUN000438	1984.89	-0.0178808	0.191217	-0.0935104	0.925498	0.0336245	1	0
AFUN000440	42810273	42813235	2963	others	No	cDNA	AFUN000440	others	unspecified product	NA	No	AFUN000440	250.605	-0.733308	0.161689	-4.53529	5.75255e-06	5.24014	3.9325e-05	4.40533	x	AFUN000440	178.467	-0.5922	0.698038	-0.848378	0.396227	0.402056	0.910068	0.0409264		AFUN000440	214.539	0.043874	0.201568	0.217664	0.827691	0.0821318	1	0
AFUN000441	42802064	42803851	1788	others	No	cDNA	AFUN000441	others	unspecified product	NA	No	AFUN000441	233.643	1.47878	0.217585	6.79634	1.07312e-11	10.9694	2.00824e-10	9.69718	x	AFUN000441	131.921	1.26962	0.762279	1.66556	0.0958002	1.01863	0.607269	0.216619		AFUN000441	222.526	0.474188	0.258095	1.83726	0.066171	1.17933	1	0
AFUN000443	42763703	42768365	4663	others	No	cDNA	AFUN000443	others	unspecified product	NA	No	AFUN000443	1290.81	-0.428726	0.596724	-0.718467	0.47247	0.325626	0.592933	0.226994		AFUN000443	1087.24	-1.46533	0.712612	-2.05628	0.0397558	1.4006	0.375681	0.42518		AFUN000443	997.379	0.380666	0.701523	0.542628	0.587386	0.231076	1	0
AFUN000447	42720540	42724717	4178	others	No	cDNA	AFUN000447	others	Importin subunit alpha [Source:UniProtKB/TrEMBL;Acc:A0A182R2Q6]	NA	No	AFUN000447	956.552	0.347494	0.166632	2.08539	0.0370335	1.4314	0.0803432	1.09505		AFUN000447	820.482	0.394801	0.591114	0.667894	0.504201	0.297396	0.944987	0.024574		AFUN000447	916.024	-0.17061	0.220525	-0.773653	0.439136	0.357401	1	0
AFUN000448	42705382	42718185	12804	others	No	cDNA	AFUN000448	others	Translation initiation factor 4G [Source:Projected from Anopheles gambiae (AGAP004750) UniProtKB/TrEMBL;Acc:A0A1S4GM12]	NA	No	AFUN000448	9469.9	0.0652484	0.265766	0.24551	0.806061	0.0936319	0.866119	0.0624225		AFUN000448	7194.36	-0.151744	0.586236	-0.258845	0.795755	0.0992205	0.985365	0.00640266		AFUN000448	8503.77	0.093571	0.34212	0.273504	0.784466	0.105426	1	0
AFUN000449	42703371	42705198	1828	others	No	cDNA	AFUN000449	others	coproporphyrinogen III oxidase [Source:Projected from Anopheles gambiae (AGAP004749) VB Community Annotation]	NA	No	AFUN000449	184.885	-0.727974	0.200557	-3.62975	0.000283691	3.54715	0.0012607	2.89939	x	AFUN000449	133.767	-0.914114	0.742643	-1.23089	0.218363	0.660822	0.794258	0.100038		AFUN000449	153.119	0.172062	0.259169	0.663899	0.506755	0.295202	1	0
AFUN000450	42698550	42702454	3905	others	No	cDNA	AFUN000450	others	Uncharacterized protein C05D11.1 [Source:Projected from Anopheles gambiae (AGAP004747) VB Community Annotation]	NA	No	AFUN000450	770.154	0.274756	0.10608	2.59009	0.00959498	2.01796	0.0261892	1.58188	x	AFUN000450	570.805	0.250494	0.58824	0.425837	0.670227	0.173778	0.981802	0.00797592		AFUN000450	714.922	0.0598243	0.1338	0.447116	0.654792	0.183897	1	0
AFUN000451	42695609	42698506	2898	others	No	cDNA	Thoc5	others	THO complex subunit 5 [Source:UniProtKB/TrEMBL;Acc:A0A182R2R0]	Thoc5	No	AFUN000451	425.554	0.456572	0.147982	3.08531	0.00203339	2.69178	0.00693723	2.15881	x	AFUN000451	353.398	0.725063	0.621688	1.16628	0.2435	0.6135	0.819629	0.0863825		AFUN000451	416.614	-0.174846	0.178298	-0.980639	0.326771	0.485757	1	0
AFUN000452	42691354	42695240	3887	others	No	cDNA	AFUN000452	others	transcription elongation regulator [Source:Projected from Anopheles gambiae (AGAP004745) VB Community Annotation]	NA	No	AFUN000452	436.598	0.030902	0.14975	0.206357	0.836512	0.077528	0.888902	0.0511462		AFUN000452	302.331	-0.0984962	0.63954	-0.154011	0.877601	0.0567029	0.988728	0.00492302		AFUN000452	390.837	0.191362	0.194924	0.981723	0.326236	0.486468	1	0
AFUN000453	42686653	42690950	4298	others	No	cDNA	skap	others	succinyl-CoA ligase beta subunit	skap	No	AFUN000453	4040.43	-0.683985	0.431008	-1.58694	0.112526	0.948748	0.198393	0.702474		AFUN000453	3985.46	-1.31305	0.5546	-2.36757	0.0179054	1.74702	0.223704	0.650326		AFUN000453	3162.69	-0.0426716	0.444276	-0.0960473	0.923483	0.0345711	1	0
AFUN000454	42685195	42686168	974	others	No	cDNA	AFUN000454	others	Transmembrane emp24 domain-containing protein [Source:Projected from Anopheles gambiae (AGAP004743) VB Community Annotation]	NA	No	AFUN000454	257.728	0.810937	0.168794	4.80429	1.55304e-06	5.80882	1.2101e-05	4.91718	x	AFUN000454	241.105	1.35818	0.66173	2.05247	0.0401242	1.39659	0.376918	0.423753		AFUN000454	269.32	-0.383826	0.193644	-1.98212	0.0474656	1.32362	1	0
AFUN000456	42682458	42683354	897	others	No	cDNA	AFUN000456	others	trafficking protein particle complex [Source:Projected from Anopheles gambiae (AGAP000995) VB Community Annotation]	NA	No	AFUN000456	72.0886	0.117618	0.301859	0.389646	0.696798	0.156893	0.783614	0.105898		AFUN000456	61.0976	0.649023	0.985052	0.658872	0.509978	0.292449	0.945716	0.0242395		AFUN000456	70.4262	-0.270536	0.408791	-0.661795	0.508103	0.294049	1	0
AFUN000457	42671379	42673408	2030	others	No	cDNA	AFUN000457	others	unspecified product	NA	No	AFUN000457	6.55115	-2.15617	0.954843	-2.25814	0.0239372	1.62093	0.0562116	1.25017		AFUN000457	3.66979	-1.89441	3.34214	-0.566826	0.570832	0.243492	0.962851	0.0164408		AFUN000457	4.96567	0.216277	1.51183	0.143056	0.886246	0.0524456	1	0
AFUN000458	42659187	42668768	9582	others	No	cDNA	AFUN000458	others	Pyruvate carboxylase [Source:Projected from Anopheles gambiae (AGAP004742) UniProtKB/TrEMBL;Acc:A7UUW7]	NA	No	AFUN000458	5172.65	-0.0125627	0.399591	-0.0314388	0.97492	0.0110312	0.98464	0.00672241		AFUN000458	3931.73	-0.233619	0.55095	-0.424029	0.671544	0.172925	0.982031	0.00787499		AFUN000458	4608.46	0.0968228	0.465365	0.208058	0.835184	0.0782179	1	0
AFUN000461	42650978	42653240	2263	others	No	cDNA	AFUN000461	others	H/ACA ribonucleoprotein complex subunit [Source:Projected from Anopheles gambiae (AGAP004739) VB Community Annotation]	NA	No	AFUN000461	2207.52	-0.929302	0.186171	-4.99165	5.98662e-07	6.22282	5.16614e-06	5.28683	x	AFUN000461	1755.58	-0.852391	0.584209	-1.45905	0.144551	0.839979	0.706024	0.151181		AFUN000461	1843.25	-0.0843736	0.258003	-0.327026	0.743648	0.128632	1	0
AFUN000462	42646550	42648795	2246	others	No	cDNA	AFUN000462	others	Rhomboid-like protein [Source:UniProtKB/TrEMBL;Acc:A0A182R2S1]	NA	No	AFUN000462	189.185	0.434773	0.253308	1.71638	0.0860917	1.06504	0.159754	0.796548		AFUN000462	199.845	0.49557	0.696642	0.71137	0.476855	0.321614	0.932858	0.0301847		AFUN000462	189.091	-0.478153	0.271881	-1.75869	0.0786304	1.10441	1	0
AFUN000463	42644743	42646175	1433	others	No	cDNA	AFUN000463	others	Mitochondrial GTPase 1 [Source:UniProtKB/TrEMBL;Acc:A0A182R2S2]	NA	No	AFUN000463	124.901	0.166775	0.314984	0.529473	0.596478	0.224406	0.699646	0.155122		AFUN000463	96.525	0.975606	0.817651	1.19318	0.232798	0.633021	0.809133	0.0919801		AFUN000463	122.945	-0.205083	0.335027	-0.612138	0.540447	0.267247	1	0
AFUN000464	42642465	42644193	1729	others	No	cDNA	AFUN000464	others	unspecified product	NA	No	AFUN000464	8.42242	-0.497899	0.635156	-0.783899	0.433099	0.363413	0.557525	0.253735		AFUN000464	5.5796	-0.594356	2.51698	-0.236138	0.813325	0.0897357	0.985365	0.00640266		AFUN000464	7.17949	0.203202	0.882955	0.230139	0.817984	0.0872551	1	0
AFUN000467	42607330	42609826	2497	others	No	cDNA	AFUN000467	others	unspecified product	NA	No	AFUN000467	14.7279	-0.994277	0.441816	-2.25043	0.0244215	1.61223	0.0571491	1.24299		AFUN000467	10.9671	-0.786296	1.84861	-0.425344	0.670586	0.173546	0.981835	0.00796154		AFUN000467	12.3837	-0.0346595	0.625258	-0.0554324	0.955794	0.0196357	1	0
AFUN000469	42578717	42587510	8794	others	No	cDNA	AFUN000469	others	secretory phospholipase A2 [Source:Projected from Anopheles gambiae (AGAP004731) VB Community Annotation]	NA	No	AFUN000469	139.247	-0.549737	0.394342	-1.39406	0.163299	0.787016	0.265536	0.575877		AFUN000469	107.395	-0.00952302	0.783849	-0.012149	0.990307	0.00423028	0.999499	0.000217778		AFUN000469	126.904	-0.205748	0.455621	-0.451577	0.651574	0.186036	1	0
AFUN000470	42577342	42578550	1209	others	No	cDNA	AFUN000470	others	phospholipase A2, venom [Source:Projected from Anopheles gambiae (AGAP004730) VB Community Annotation]	NA	No	AFUN000470	2.54071	-1.84834	1.59085	-1.16185	0.245295	0.61031	0.364544	0.43825		AFUN000470	1.59463	0.208419	4.42417	0.047109	0.962426	0.0166325	1	0		AFUN000470	2.30839	-0.692008	1.92537	-0.359416	0.719284	0.1431	1	0
AFUN000471	42569706	42573656	3951	others	No	cDNA	AFUN000471	others	unspecified product	NA	No	AFUN000471	584.369	-0.286571	0.132714	-2.15932	0.0308255	1.51109	0.0691313	1.16033		AFUN000471	401.619	-0.384315	0.612154	-0.627808	0.53013	0.275618	0.95185	0.0214314		AFUN000471	509.644	0.205455	0.167374	1.22752	0.219628	0.658312	1	0
AFUN000472	42565066	42565669	604	others	No	cDNA	AFUN000472	others	unspecified product	NA	No	AFUN000472	3.63888	-5.76208	1.39982	-4.11629	3.85017e-05	4.41452	0.000216379	3.66478	x	AFUN000472	2.65471	-5.2103	4.24313	-1.22794	0.219471	0.658624	0.794258	0.100038		AFUN000472	2.04185	0	3.12991	0	1	0	1	0
AFUN000473	42555034	42560561	5528	others	No	cDNA	AFUN000473	others	unspecified product	NA	No	AFUN000473	47.1431	-1.45895	0.586062	-2.48942	0.0127953	1.89295	0.0333686	1.47666	x	AFUN000473	28.056	-2.37388	1.26359	-1.87867	0.0602889	1.21976	0.485286	0.314002		AFUN000473	34.2455	0.961744	0.76298	1.26051	0.207486	0.683012	1	0
AFUN000474	42551600	42553821	2222	others	No	cDNA	Gr25	others	gustatory receptor	Gr25	No	AFUN000474	4.22879	0.344722	0.827763	0.41645	0.677081	0.16936	0.768004	0.114636		AFUN000474	3.18819	-0.717612	3.24331	-0.221259	0.824891	0.0836035	0.985365	0.00640266		AFUN000474	3.57628	0.354377	1.08812	0.325679	0.744668	0.128038	1	0
AFUN000475	42544386	42550590	6205	others	No	cDNA	AFUN000475	others	Uncharacterized protein CG3556 [Source:Projected from Anopheles gambiae (AGAP004726) VB Community Annotation]	NA	No	AFUN000475	541.865	-0.788223	0.237707	-3.31594	0.000913364	3.03936	0.0034653	2.46026	x	AFUN000475	453.164	-0.442664	0.684469	-0.646727	0.517809	0.285831	0.948683	0.0228789		AFUN000475	475.577	-0.267091	0.356121	-0.75	0.453254	0.343658	1	0
AFUN000476	42540210	42543973	3764	others	No	cDNA	AFUN000476	others	Eukaryotic translation initiation factor 3 subunit C [Source:UniProtKB/TrEMBL;Acc:A0A182R2T5]	NA	No	AFUN000476	2966.45	-0.122066	0.0865821	-1.40982	0.158592	0.79972	0.259678	0.585564		AFUN000476	2397.52	-0.0675728	0.560352	-0.12059	0.904016	0.0438239	0.991504	0.00370554		AFUN000476	2700.76	-0.0901794	0.150236	-0.600249	0.54834	0.26095	1	0
AFUN000477	42537360	42539598	2239	others	No	cDNA	AFUN000477	others	Intraflagellar transport 74 homolog [Source:Projected from Anopheles gambiae (AGAP004724) VB Community Annotation]	NA	No	AFUN000477	15.9266	-0.950672	0.523873	-1.8147	0.0695704	1.15758	0.134698	0.87064		AFUN000477	22.5021	0.355764	1.51492	0.234841	0.814332	0.0891983	0.985365	0.00640266		AFUN000477	16.6138	-1.35296	0.773467	-1.74921	0.080254	1.09553	1	0
AFUN000478	42529585	42535078	5494	others	No	cDNA	AFUN000478	others	chromobox protein homolog [Source:Projected from Anopheles gambiae (AGAP004723) VB Community Annotation]	NA	No	AFUN000478	398.717	0.330335	0.159386	2.07255	0.0382145	1.41777	0.0824149	1.08399		AFUN000478	359.081	0.496728	0.643801	0.771555	0.440378	0.356175	0.924925	0.0338934		AFUN000478	388.221	-0.267632	0.22746	-1.17661	0.239351	0.620965	1	0
AFUN000482	42498971	42500564	1594	IMPs	Yes	cDNA	AFUN000482	others	CLIP-domain serine protease [Source:Projected from Anopheles gambiae (AGAP004719) VB Community Annotation]	NA	No	AFUN000482	51.7004	0.593142	0.286422	2.07087	0.0383714	1.41599	0.0826834	1.08258		AFUN000482	44.6407	0.945647	1.0758	0.879019	0.379391	0.420913	0.89755	0.0469412		AFUN000482	51.7942	-0.227937	0.377797	-0.603334	0.546287	0.262579	1	0
AFUN000483	42480997	42483099	2103	others	No	cDNA	AFUN000483	others	Peptidase S1 domain-containing protein [Source:UniProtKB/TrEMBL;Acc:A0A182R2U2]	NA	No	AFUN000483	136.3	-1.35352	0.321052	-4.21591	2.48775e-05	4.60419	0.000146453	3.8343	x	AFUN000483	119.682	-1.25097	0.790432	-1.58264	0.113504	0.944989	0.647635	0.18867		AFUN000483	108.246	-0.241031	0.41338	-0.583073	0.559844	0.251933	1	0
AFUN000484	42472068	42480953	8886	others	No	cDNA	AFUN000484	others	unspecified product	NA	No	AFUN000484	51.7398	-1.53897	0.327634	-4.69724	2.63698e-06	5.57889	1.93981e-05	4.71224	x	AFUN000484	48.5444	-1.44892	1.01141	-1.43257	0.15198	0.818215	0.711627	0.147748		AFUN000484	39.8146	-0.332945	0.423732	-0.785745	0.432017	0.364499	1	0
AFUN000486	42455137	42458522	3386	others	No	cDNA	AFUN000486	others	unspecified product	NA	No	AFUN000486	12.9502	-0.772586	0.683626	-1.13013	0.258421	0.587672	0.378715	0.421687		AFUN000486	11.8924	0.618282	1.91183	0.323397	0.746394	0.127032	0.984947	0.00658717		AFUN000486	12.7961	-0.705214	0.909613	-0.77529	0.438168	0.358359	1	0
AFUN000489	42428857	42432850	3994	others	No	cDNA	AFUN000489	others	Pyruvate dehydrogenase phosphatase regulatory subunit, mitochondrial [Source:Projected from Anopheles gambiae (AGAP004715) VB Community Annotation]	NA	No	AFUN000489	517.816	-0.738728	0.167599	-4.4077	1.04474e-05	4.98099	6.75138e-05	4.17061	x	AFUN000489	440.045	-0.891266	0.611522	-1.45745	0.144991	0.838659	0.706074	0.15115		AFUN000489	430.924	-0.0672021	0.198643	-0.338305	0.735133	0.133634	1	0
AFUN000490	42400934	42406291	5358	others	No	cDNA	AFUN000490	others	Integrase catalytic domain-containing protein [Source:UniProtKB/TrEMBL;Acc:A0A182R2U9]	NA	No	AFUN000490	93.3453	-1.66538	0.490884	-3.39261	0.000692301	3.15971	0.00272459	2.5647	x	AFUN000490	58.2016	-3.08746	1.05522	-2.9259	0.00343463	2.46412	0.0654922	1.18381		AFUN000490	63.6291	1.31666	0.68426	1.92421	0.0543288	1.26497	1	0
AFUN000491	42389490	42398464	8975	others	No	cDNA	AFUN000491	others	unspecified product	NA	No	AFUN000491	47.9118	-1.0465	0.401718	-2.60506	0.00918595	2.03688	0.0251913	1.59875	x	AFUN000491	38.3981	-1.72528	1.10801	-1.5571	0.119447	0.922826	0.662427	0.178862		AFUN000491	35.9855	0.332957	0.513952	0.647837	0.517091	0.286433	1	0
AFUN000492	42374853	42377360	2508	others	No	cDNA	AFUN000492	others	arginyl-tRNA synthetase [Source:Projected from Anopheles gambiae (AGAP004708) VB Community Annotation]	NA	No	AFUN000492	660.714	-0.107518	0.149408	-0.719631	0.471752	0.326286	0.592459	0.227342		AFUN000492	648.776	0.474187	0.660026	0.718437	0.472488	0.325609	0.930976	0.0310614		AFUN000492	650.671	-0.531246	0.284999	-1.86403	0.0623177	1.20539	1	0
AFUN000493	42370806	42372815	2010	others	No	cDNA	AFUN000493	others	ATP-dependent RNA helicase DDX41 [Source:Projected from Anopheles gambiae (AGAP004711) VB Community Annotation]	NA	No	AFUN000493	86.9839	-0.74719	0.332127	-2.24971	0.0244672	1.61142	0.0572455	1.24226		AFUN000493	68.1927	-0.959873	0.92059	-1.04267	0.297101	0.527097	0.857869	0.0665792		AFUN000493	71.7726	0.0879976	0.432214	0.203597	0.838668	0.0764098	1	0
AFUN000494	42311784	42353800	42017	others	No	cDNA	AFUN000494	others	voltage-gated sodium channel	NA	No	AFUN000494	1922.17	-0.697079	0.287492	-2.42469	0.0153213	1.8147	0.0387297	1.41196	x	AFUN000494	1535.12	-0.750214	0.606959	-1.23602	0.216451	0.664641	0.794258	0.100038		AFUN000494	1624.71	-0.0291327	0.369657	-0.0788102	0.937184	0.0281753	1	0
AFUN000495	42301196	42308940	7745	others	No	cDNA	AFUN000495	others	unspecified product	NA	No	AFUN000495	1014.1	0.0286904	0.135119	0.212333	0.831847	0.0799565	0.885698	0.0527143		AFUN000495	760.158	0.0671683	0.600109	0.111927	0.910881	0.0405382	0.99189	0.00353644		AFUN000495	927.89	0.0233679	0.206495	0.113165	0.9099	0.0410063	1	0
AFUN000496	42294968	42299787	4820	others	No	cDNA	AFUN000496	others	DNA-directed RNA polymerase subunit [Source:UniProtKB/TrEMBL;Acc:A0A182R2V5]	NA	No	AFUN000496	790.624	0.338868	0.147854	2.29191	0.0219108	1.65934	0.0521341	1.28288		AFUN000496	530.636	0.401732	0.61506	0.65316	0.513653	0.28933	0.946469	0.0238937		AFUN000496	733.889	0.176887	0.197281	0.896628	0.369918	0.431895	1	0
AFUN000497	42292727	42294600	1874	others	No	cDNA	AFUN000497	others	COMPASS component SPP1 [Source:Projected from Anopheles gambiae (AGAP004704) VB Community Annotation]	NA	No	AFUN000497	255.601	1.12742	0.170512	6.61195	3.79285e-11	10.421	6.63125e-10	9.1784	x	AFUN000497	181.885	0.983522	0.702667	1.3997	0.161604	0.791549	0.733177	0.134791		AFUN000497	248.404	0.146881	0.21513	0.682752	0.494763	0.305603	1	0
AFUN000499	42270338	42272754	2417	others	No	cDNA	AFUN000499	others	unspecified product	NA	No	AFUN000499	13.3584	-0.270398	0.668333	-0.404586	0.685782	0.163814	0.774844	0.110786		AFUN000499	7.66119	1.0989	2.19148	0.501441	0.616061	0.210376	0.969848	0.0132962		AFUN000499	12.652	0.0550985	0.750355	0.07343	0.941464	0.0261963	1	0
AFUN000501	42256308	42257823	1516	others	No	cDNA	AFUN000501	others	unspecified product	NA	No	AFUN000501	31.3803	-2.45611	0.660632	-3.71781	0.000200956	3.6969	0.000925921	3.03343	x	AFUN000501	17.1756	-1.05063	1.57122	-0.668671	0.503706	0.297823	0.944987	0.024574		AFUN000501	25.6707	-0.362408	0.81485	-0.444755	0.656497	0.182767	1	0
AFUN000502	42235277	42237003	1727	others	No	cDNA	AFUN000502	others	unspecified product	NA	No	AFUN000502	33.8626	-1.03613	0.716401	-1.4463	0.148094	0.829461	0.245982	0.609096		AFUN000502	32.6597	0.369646	1.33125	0.277669	0.781267	0.107201	0.985365	0.00640266		AFUN000502	32.8702	-0.876668	0.911878	-0.961387	0.336357	0.473199	1	0
AFUN000503	42205296	42208466	3171	others	No	cDNA	AFUN000503	others	Pre-mRNA-splicing factor 38B [Source:Projected from Anopheles gambiae (AGAP004698) UniProtKB/TrEMBL;Acc:A0A1S4GMG8]	NA	No	AFUN000503	327.105	0.116258	0.155552	0.747391	0.454828	0.342153	0.576748	0.239014		AFUN000503	260.861	0.515218	0.654362	0.787359	0.431071	0.365451	0.923499	0.0345635		AFUN000503	313.185	-0.160051	0.182084	-0.878997	0.379403	0.420899	1	0
AFUN000504	42209639	42214588	4950	others	No	cDNA	AFUN000504	others	RAF proto-oncogene serine/threonine-protein kinase [Source:Projected from Anopheles gambiae (AGAP004699) VB Community Annotation]	NA	No	AFUN000504	668.224	-0.12095	0.166819	-0.725039	0.468428	0.329357	0.589593	0.229448		AFUN000504	525.196	-0.0527748	0.596938	-0.0884092	0.929551	0.0317266	0.993947	0.00263657		AFUN000504	607.63	-0.0515645	0.207682	-0.248286	0.803913	0.0947909	1	0
AFUN000505	42171019	42201825	30807	others	No	cDNA	AFUN000505	others	Homeobox protein extradenticle [Source:Projected from Anopheles gambiae (AGAP004696) UniProtKB/Swiss-Prot;Acc:Q7PMT1]	NA	No	AFUN000505	2024.5	-0.367231	0.188807	-1.945	0.0517744	1.28588	0.10588	0.975186		AFUN000505	1715.52	-0.153546	0.574917	-0.267074	0.789412	0.102696	0.985365	0.00640266		AFUN000505	1835.69	-0.217961	0.250356	-0.870605	0.38397	0.415703	1	0
AFUN000506	42165236	42170082	4847	others	No	cDNA	AFUN000506	others	unspecified product	NA	No	AFUN000506	676.182	-0.14692	0.231103	-0.635734	0.52495	0.279882	0.638697	0.194705		AFUN000506	487.66	0.232047	0.623932	0.37191	0.70996	0.148766	0.983345	0.00729415		AFUN000506	624.894	-0.0277587	0.277953	-0.0998683	0.920449	0.0360003	1	0
AFUN000507	42160866	42163354	2489	others	No	cDNA	AFUN000507	others	ESCRT-I complex subunit MVB12 [Source:Projected from Anopheles gambiae (AGAP004695) VB Community Annotation]	NA	No	AFUN000507	383.792	0.555832	0.191523	2.90217	0.00370582	2.43112	0.0117102	1.93144	x	AFUN000507	355.214	1.01386	0.626603	1.61803	0.105656	0.976104	0.627422	0.20244		AFUN000507	391.223	-0.366912	0.231686	-1.58366	0.113272	0.945878	1	0
AFUN000508	69969081	69971861	2781	others	No	cDNA	AFUN000508	others	unspecified product	NA	No	AFUN000508	38.4966	-0.389787	0.410084	-0.950505	0.341856	0.466157	0.466742	0.330923		AFUN000508	28.3309	-0.906207	1.26466	-0.71656	0.473646	0.324546	0.931719	0.0307149		AFUN000508	31.8821	0.26956	0.543919	0.495588	0.620185	0.207479	1	0
AFUN000510	69829175	69835571	6397	others	No	cDNA	AFUN000510	others	unspecified product	NA	No	AFUN000510	187.272	0.177337	0.463196	0.382856	0.701826	0.15377	0.787603	0.103693		AFUN000510	178.672	0.851302	0.797166	1.06791	0.285561	0.544301	0.854042	0.0685207		AFUN000510	189.584	-0.485655	0.581528	-0.835137	0.403641	0.394005	1	0
AFUN000511	69804043	69809399	5357	others	No	cDNA	AFUN000511	others	gamma-tubulin complex component [Source:Projected from Anopheles gambiae (AGAP010956) VB Community Annotation]	NA	No	AFUN000511	294.348	0.0485779	0.177121	0.274264	0.783882	0.10575	0.848164	0.0715202		AFUN000511	193.389	-0.00824211	0.68669	-0.0120027	0.990423	0.00417907	0.999499	0.000217778		AFUN000511	264.355	0.252186	0.213476	1.18133	0.23747	0.624391	1	0
AFUN000514	69759048	69760509	1462	others	No	cDNA	AFUN000514	others	unspecified product	NA	No	AFUN000514	162.102	0.645471	0.192634	3.35077	0.00080588	3.09373	0.00310645	2.50774	x	AFUN000514	122.537	0.67717	0.760888	0.889973	0.37348	0.427732	0.895453	0.047957		AFUN000514	155.868	0.0138849	0.234006	0.0593357	0.952685	0.0210508	1	0
AFUN000515	69755709	69758144	2436	others	No	cDNA	AFUN000515	others	PRELI domain-containing protein 1, mitochondrial [Source:Projected from Anopheles gambiae (AGAP010959) VB Community Annotation]	NA	No	AFUN000515	306.004	0.218799	0.245909	0.889757	0.373597	0.427597	0.497622	0.303101		AFUN000515	264.74	0.312968	0.65535	0.477558	0.632965	0.198621	0.972016	0.0123267		AFUN000515	291.236	-0.197367	0.296615	-0.665396	0.505797	0.296024	1	0
AFUN000518	69748885	69753425	4541	CYPs	Yes	cDNA	CYP6AK1	CYPs	cytochrome P450	CYP6AK1	Yes	AFUN000518	491.903	0.774691	0.187648	4.12842	3.65269e-05	4.43739	0.000206829	3.68439	x	AFUN000518	457.629	0.944182	0.606974	1.55556	0.119814	0.921493	0.663033	0.178465		AFUN000518	499.422	-0.308478	0.22239	-1.3871	0.165412	0.781434	1	0
AFUN000519	69744246	69748388	4143	others	No	cDNA	AFUN000519	others	unspecified product	NA	No	AFUN000519	2486.24	-0.328237	0.194305	-1.68929	0.0911642	1.04018	0.167438	0.776145		AFUN000519	2049.79	-0.302565	0.550996	-0.549124	0.582921	0.234391	0.963704	0.0160563		AFUN000519	2213.36	-0.108674	0.231847	-0.468731	0.639262	0.194321	1	0
AFUN000520	69739738	69740652	915	others	No	cDNA	AFUN000520	others	unspecified product	NA	No	AFUN000520	19.4425	-2.18611	0.625465	-3.49518	0.000473745	3.32446	0.00196823	2.70592	x	AFUN000520	23.6895	-2.12498	1.38131	-1.53838	0.123955	0.906735	0.670578	0.173551		AFUN000520	12.8802	-0.694625	0.796213	-0.872411	0.382984	0.416819	1	0
AFUN000521	69737526	69739555	2030	others	No	cDNA	AFUN000521	others	unspecified product	NA	No	AFUN000521	78.99	-0.496178	0.548687	-0.904301	0.365836	0.436714	0.489892	0.3099		AFUN000521	51.5849	-1.579	0.989176	-1.59628	0.110426	0.956928	0.639412	0.194219		AFUN000521	61.1952	0.785504	0.659422	1.1912	0.233575	0.631574	1	0
AFUN000522	69719316	69729878	10563	others	No	cDNA	AFUN000522	others	Ig-like domain-containing protein [Source:UniProtKB/TrEMBL;Acc:A0A182R2Y1]	NA	No	AFUN000522	595.268	0.208726	0.200776	1.03959	0.298528	0.525015	0.422501	0.374172		AFUN000522	543.067	0.107386	0.609192	0.176277	0.860076	0.065463	0.987156	0.00561427		AFUN000522	559.374	-0.211623	0.230611	-0.917661	0.358796	0.445152	1	0
AFUN000523	69680902	69718074	37173	others	No	cDNA	AFUN000523	others	protein N-terminal asparagine amidohydrolase [Source:Projected from Anopheles gambiae (AGAP010963) VB Community Annotation]	NA	No	AFUN000523	534.822	-0.05634	0.131211	-0.429384	0.667644	0.175455	0.760816	0.118721		AFUN000523	446.216	0.291462	0.617859	0.471729	0.63712	0.195779	0.972766	0.0119916		AFUN000523	505.64	-0.220281	0.185351	-1.18845	0.234656	0.629569	1	0
AFUN000527	83795657	83798128	2472	others	No	cDNA	AFUN000527	others	Chaperonin containing TCP1 subunit [Source:Projected from Anopheles gambiae (AGAP008249) VB Community Annotation]	NA	No	AFUN000527	1452.34	0.246645	0.130586	1.88876	0.0589241	1.22971	0.117489	0.930002		AFUN000527	1095.52	0.000688275	0.578534	0.00118969	0.999051	0.000412443	0.999842	6.85588e-05		AFUN000527	1321.86	0.104964	0.180594	0.581212	0.561098	0.250962	1	0
AFUN000528	83798715	83819302	20588	others	No	cDNA	AFUN000528	others	AP-1 complex subunit gamma [Source:Projected from Anopheles gambiae (AGAP029572) UniProtKB/TrEMBL;Acc:A0A453Z0F0]	NA	No	AFUN000528	1913.21	0.230042	0.120404	1.91058	0.0560584	1.25136	0.112833	0.947564		AFUN000528	1493.35	0.187851	0.577264	0.325417	0.744866	0.127922	0.984947	0.00658717		AFUN000528	1777.2	-0.0084655	0.189577	-0.0446547	0.964383	0.0157507	1	0
AFUN000529	83819547	83824393	4847	others	No	cDNA	AFUN000529	others	Protein of unknown function DUF255 [Source:Projected from Anopheles gambiae (AGAP008252) UniProtKB/TrEMBL;Acc:A0A1S4GXQ3]	NA	No	AFUN000529	981.414	-0.0507529	0.145784	-0.348137	0.727737	0.138025	0.807591	0.0928083		AFUN000529	731.767	-0.306762	0.586601	-0.522947	0.601011	0.221118	0.967611	0.0142993		AFUN000529	866.715	0.136267	0.188999	0.720994	0.470914	0.327059	1	0
AFUN000530	83827135	83828741	1607	others	No	cDNA	AFUN000530	others	unspecified product	NA	No	AFUN000530	126.588	-1.34643	0.347626	-3.8732	0.000107414	3.96894	0.000534056	3.27241	x	AFUN000530	86.2693	-1.42935	0.838065	-1.70554	0.088094	1.05505	0.58593	0.232154		AFUN000530	99.3632	0.22689	0.431102	0.526301	0.598679	0.222806	1	0
AFUN000531	83830336	83831254	919	others	No	cDNA	AFUN000531	others	unspecified product	NA	No	AFUN000531	3.23956	-0.810054	0.95438	-0.848776	0.396006	0.402298	0.520625	0.283475		AFUN000531	2.17203	-4.92078	4.62957	-1.0629	0.287827	0.540869	1	0		AFUN000531	1.88542	3.1968	1.85737	1.72114	0.0852246	1.06944	1	0
AFUN000532	83834420	83858109	23690	others	No	cDNA	AFUN000532	others	VWFC domain-containing protein [Source:UniProtKB/TrEMBL;Acc:A0A182R2Z1]	NA	No	AFUN000532	387.055	-0.217273	0.313511	-0.693031	0.48829	0.311322	0.60736	0.216554		AFUN000532	255.406	-0.672696	0.701956	-0.958316	0.337903	0.471207	0.881482	0.0547866		AFUN000532	327.832	0.404081	0.406323	0.994481	0.319989	0.494865	1	0
AFUN000538	83965473	83968487	3015	others	No	cDNA	AFUN000538	others	unspecified product	NA	No	AFUN000538	8.8483	-2.15922	0.717423	-3.00969	0.00261517	2.5825	0.00864476	2.06325	x	AFUN000538	5.86486	-4.89419	2.89844	-1.68856	0.0913033	1.03951	0.596308	0.224529		AFUN000538	5.39512	2.4715	1.67319	1.47712	0.139643	0.85498	1	0
AFUN000539	83968507	83971658	3152	others	No	cDNA	AFUN000539	others	pre-mRNA-processing factor [Source:Projected from Anopheles gambiae (AGAP008263) VB Community Annotation]	NA	No	AFUN000539	501.563	0.105554	0.15865	0.66533	0.50584	0.295987	0.622448	0.205897		AFUN000539	313.592	-0.178482	0.662777	-0.269295	0.787703	0.103638	0.985365	0.00640266		AFUN000539	442.438	0.390499	0.23757	1.64372	0.100233	0.998989	1	0
AFUN000540	83972020	83974867	2848	others	No	cDNA	AFUN000540	others	Palmitoyltransferase [Source:Projected from Anopheles gambiae (AGAP008264) UniProtKB/TrEMBL;Acc:Q7Q471]	NA	No	AFUN000540	296.612	0.284687	0.178196	1.5976	0.110132	0.958088	0.194872	0.710251		AFUN000540	243.921	0.755308	0.656505	1.1505	0.249939	0.602167	0.822968	0.0846171		AFUN000540	290.528	-0.216021	0.195286	-1.10618	0.268648	0.570816	1	0
AFUN000542	83980754	83985167	4414	others	No	cDNA	AFUN000542	others	unspecified product	NA	No	AFUN000542	631.302	0.355497	0.235258	1.51109	0.130765	0.883509	0.223551	0.650623		AFUN000542	430.711	0.559643	0.6059	0.923656	0.355665	0.448958	0.885935	0.0525982		AFUN000542	593.758	0.12023	0.259254	0.463755	0.642824	0.191908	1	0
AFUN000543	83985367	83986093	727	others	No	cDNA	AFUN000543	others	unspecified product	NA	No	AFUN000543	42.3712	1.39758	0.435534	3.2089	0.00133245	2.87535	0.0048094	2.31791	x	AFUN000543	30.7246	1.79152	1.26243	1.41911	0.155868	0.807243	0.718141	0.14379		AFUN000543	42.9653	0.0446819	0.519412	0.086024	0.931447	0.0308417	1	0
AFUN000544	83986096	83988352	2257	others	No	cDNA	AFUN000544	others	Ran GTPase-activating protein [Source:Projected from Anopheles gambiae (AGAP008267) VB Community Annotation]	NA	No	AFUN000544	287.468	-0.391918	0.157543	-2.48769	0.0128576	1.89084	0.0334852	1.47515	x	AFUN000544	194.371	-0.762457	0.700645	-1.08822	0.276497	0.558309	0.848334	0.0714331		AFUN000544	241.532	0.335756	0.227855	1.47355	0.140602	0.852007	1	0
AFUN000545	83988671	83996919	8249	others	No	cDNA	AFUN000545	others	Maternal tudor protein [Source:Projected from Anopheles gambiae (AGAP008268) VB Community Annotation]	NA	No	AFUN000545	4174.05	0.325147	0.13211	2.46118	0.013848	1.85861	0.0356408	1.44805	x	AFUN000545	3051.09	0.0889561	0.55048	0.161597	0.871623	0.0596713	0.988212	0.00514969		AFUN000545	3816.92	0.145759	0.169803	0.858396	0.390674	0.408186	1	0
AFUN000546	84001766	84007915	6150	others	No	cDNA	AFUN000546	others	unspecified product	NA	No	AFUN000546	152.229	-1.23159	0.33068	-3.72442	0.000195765	3.70826	0.000908564	3.04164	x	AFUN000546	137.915	-0.618328	0.739014	-0.836693	0.402765	0.394948	0.913599	0.0392445		AFUN000546	131.402	-0.531386	0.398336	-1.33401	0.182199	0.739453	1	0
AFUN000547	83996982	84009506	12525	others	No	cDNA	AFUN000547	others	Protein pelota homolog [Source:Projected from Anopheles gambiae (AGAP008269) UniProtKB/TrEMBL;Acc:A0A1S4GYG2]	NA	No	AFUN000547	595.141	-0.19999	0.134762	-1.48402	0.137803	0.860741	0.23289	0.632849		AFUN000547	460.709	-0.288952	0.600052	-0.481545	0.630129	0.200571	0.971877	0.0123886		AFUN000547	528.033	0.0241052	0.166473	0.144799	0.884869	0.0531208	1	0
AFUN000548	84010014	84011684	1671	others	No	cDNA	AFUN000548	others	unspecified product	NA	No	AFUN000548	173.29	-0.945098	0.215009	-4.39561	1.1046e-05	4.95679	7.11293e-05	4.14795	x	AFUN000548	113.369	-1.18242	0.784526	-1.50718	0.131764	0.880204	0.683143	0.165488		AFUN000548	139.634	0.347198	0.290328	1.19588	0.231742	0.634995	1	0
AFUN000549	84011887	84012855	969	others	No	cDNA	AFUN000549	others	THAP-type domain-containing protein [Source:UniProtKB/TrEMBL;Acc:A0A182R308]	NA	No	AFUN000549	32.2545	1.00479	0.362559	2.77138	0.00558196	2.25321	0.0165219	1.78194	x	AFUN000549	25.9808	0.874779	1.30144	0.672161	0.501481	0.299745	0.943497	0.0252597		AFUN000549	31.7582	-0.0188508	0.434931	-0.0433421	0.965429	0.0152797	1	0
AFUN000550	84013161	84014558	1398	others	No	cDNA	AFUN000550	others	Secretion-regulating guanine nucleotide exchange factor [Source:Projected from Anopheles gambiae (AGAP008272) UniProtKB/TrEMBL;Acc:A0A1S4GXT1]	NA	No	AFUN000550	165.245	-0.883136	0.206644	-4.2737	1.92259e-05	4.71611	0.000115745	3.9365	x	AFUN000550	107.966	-1.12091	0.783585	-1.43049	0.152576	0.816515	0.712303	0.147336		AFUN000550	134.001	0.360531	0.268937	1.34058	0.180058	0.744589	1	0
AFUN000551	84064220	84069901	5682	others	No	cDNA	AFUN000551	others	SH2 domain-containing protein [Source:UniProtKB/TrEMBL;Acc:A0A182R310]	NA	No	AFUN000551	56.3762	0.317889	0.484891	0.655588	0.512089	0.290654	0.627926	0.202092		AFUN000551	50.1646	0.367475	0.999534	0.367646	0.713137	0.146827	0.983533	0.00721112		AFUN000551	54.15	-0.218017	0.565622	-0.385446	0.699907	0.15496	1	0
AFUN000554	83663300	83667156	3857	others	No	cDNA	AFUN000554	others	unspecified product	NA	No	AFUN000554	1907.19	-1.6131	0.26435	-6.10213	1.04666e-09	8.98019	1.45835e-08	7.83614	x	AFUN000554	1995.25	-1.50964	0.563095	-2.68096	0.00734113	2.13424	0.118352	0.926824		AFUN000554	1440.95	-0.504366	0.28558	-1.76611	0.0773769	1.11139	1	0
AFUN000558	67269841	67270841	1001	others	No	cDNA	AFUN000558	others	unspecified product	NA	No	AFUN000558	17.8119	1.57741	0.474309	3.32571	0.000881923	3.05457	0.00336401	2.47314	x	AFUN000558	8.6752	1.05229	2.07567	0.506966	0.612179	0.213122	0.969848	0.0132962		AFUN000558	16.4994	0.731328	0.56939	1.2844	0.199	0.701146	1	0
AFUN000559	56704338	56705098	761	others	No	cDNA	AFUN000559	others	unspecified product	NA	No	AFUN000559	1.88679	-3.6672	1.5811	-2.31941	0.020373	1.69095	0.0493397	1.3068	x	AFUN000559	1.27945	-2.39067	5.35279	-0.44662	0.655149	0.18366	1	0		AFUN000559	1.31655	-0.885157	2.60701	-0.33953	0.734211	0.134179	1	0
AFUN000566	76450343	76451687	1345	OPs	Yes	cDNA	AFUN000566	others	odorant-binding protein [Source:Projected from Anopheles gambiae (AGAP009065) VB Community Annotation]	NA	No	AFUN000566	3.83303	-1.77693	1.06967	-1.6612	0.0966734	1.01469	0.175706	0.755213		AFUN000566	0.869547	0.413646	5.88076	0.0703387	0.943924	0.025063	1	0		AFUN000566	3.28218	0.627278	1.5174	0.41339	0.679321	0.167925	1	0
AFUN000567	6450249	6453422	3174	others	No	cDNA	AFUN000567	others	unspecified product	NA	No	AFUN000567	499.149	-0.444049	0.145945	-3.04258	0.00234561	2.62974	0.0078648	2.10431	x	AFUN000567	344.991	-0.419017	0.628505	-0.666689	0.504971	0.296734	0.944987	0.024574		AFUN000567	433.952	0.141193	0.183004	0.771531	0.440392	0.35616	1	0
AFUN000568	6464142	6471559	7418	others	No	cDNA	AFUN000568	others	unspecified product	NA	No	AFUN000568	8.84105	-0.135928	0.669401	-0.203058	0.839089	0.0761918	0.890712	0.0502629		AFUN000568	7.15226	0.986322	2.27156	0.434205	0.664139	0.177741	0.980639	0.00849104		AFUN000568	8.77371	-0.404337	0.800209	-0.50529	0.613355	0.212288	1	0
AFUN000569	6467664	6468383	720	others	No	cDNA	AFUN000569	others	SVWC domain-containing protein [Source:UniProtKB/TrEMBL;Acc:A0A182R328]	NA	No	AFUN000569	347.695	-0.198441	0.872734	-0.227379	0.820129	0.0861178	0.877154	0.0569242		AFUN000569	296.271	-0.294702	0.64815	-0.454683	0.649338	0.187529	0.975931	0.0105807		AFUN000569	310.606	-0.109677	0.829471	-0.132226	0.894806	0.0482712	1	0
AFUN000570	6473068	6475305	2238	others	No	cDNA	AFUN000570	others	unspecified product	NA	No	AFUN000570	8.09068	-1.0377	0.84063	-1.23443	0.217042	0.663456	0.331412	0.479632		AFUN000570	4.17979	-0.8075	2.93072	-0.275529	0.78291	0.106288	0.985365	0.00640266		AFUN000570	6.75353	0.521812	1.196	0.436299	0.66262	0.178735	1	0
AFUN000578	18342868	18344104	1237	others	No	cDNA	Ccs	others	copper chaperone for superoxide dismutase	Ccs	No	AFUN000578	80.3517	-0.531033	0.300722	-1.76586	0.0774193	1.11115	0.146733	0.833471		AFUN000578	55.8926	-1.10808	0.962944	-1.15072	0.249847	0.602326	0.822968	0.0846171		AFUN000578	65.222	0.426527	0.389037	1.09637	0.272919	0.563967	1	0
AFUN000579	18341479	18342865	1387	others	No	cDNA	AFUN000579	others	Fanconi_A_N domain-containing protein [Source:UniProtKB/TrEMBL;Acc:A0A182R338]	NA	No	AFUN000579	26.3422	-0.267314	0.499532	-0.535129	0.592561	0.227267	0.696203	0.157264		AFUN000579	20.6548	-0.681252	1.41153	-0.482633	0.629356	0.201103	0.971877	0.0123886		AFUN000579	22.4446	0.146975	0.625141	0.235108	0.814125	0.0893088	1	0
AFUN000580	18340690	18341301	612	others	No	cDNA	AFUN000580	others	nuclear transport factor [Source:Projected from Anopheles gambiae (AGAP007024) VB Community Annotation]	NA	No	AFUN000580	200.64	2.52469	0.220918	11.4282	3.02412e-30	29.5194	3.74726e-28	27.4263	x	AFUN000580	122.68	2.10468	0.783481	2.68632	0.00722433	2.1412	0.117368	0.930451		AFUN000580	199.223	0.364288	0.255776	1.42425	0.154375	0.811422	1	0
AFUN000581	18327193	18340288	13096	others	No	cDNA	AFUN000581	others	Protein cueball [Source:Projected from Anopheles gambiae (AGAP007023) UniProtKB/Swiss-Prot;Acc:Q7QIQ6]	NA	No	AFUN000581	3030.62	-0.101886	0.1748	-0.582873	0.559979	0.251828	0.668398	0.174965		AFUN000581	2463.07	-0.0383652	0.569492	-0.0673675	0.946289	0.0239761	0.994196	0.00252795		AFUN000581	2768.75	-0.100205	0.235994	-0.42461	0.671121	0.173199	1	0
AFUN000582	18318901	18326471	7571	others	No	cDNA	AFUN000582	others	unspecified product	NA	No	AFUN000582	703.434	0.0396732	0.11932	0.332495	0.739515	0.131053	0.817322	0.0876069		AFUN000582	499.473	-0.198153	0.649956	-0.304871	0.760465	0.118921	0.985365	0.00640266		AFUN000582	625.305	0.194282	0.24132	0.805081	0.420773	0.375952	1	0
AFUN000583	18321691	18322761	1071	others	No	cDNA	AFUN000583	others	unspecified product	NA	No	AFUN000583	17.2329	-0.362083	0.411169	-0.880618	0.378525	0.421906	0.502794	0.29861		AFUN000583	13.2869	-0.633671	1.7004	-0.372659	0.709402	0.149107	0.983345	0.00729415		AFUN000583	14.7497	0.124397	0.563578	0.220727	0.825305	0.0833856	1	0
AFUN000584	18317353	18318339	987	others	No	cDNA	TPX5	others	Thioredoxin peroxidase 5 [Source:UniProtKB/TrEMBL;Acc:A0A182R343]	TPX5	No	AFUN000584	162.386	0.592781	0.223159	2.65631	0.00790004	2.10237	0.0221224	1.65517	x	AFUN000584	104.439	0.240911	0.851639	0.28288	0.777269	0.109429	0.985365	0.00640266		AFUN000584	148.291	0.342397	0.342217	1.00053	0.317056	0.498864	1	0
AFUN000585	18313203	18317335	4133	others	No	cDNA	AFUN000585	others	strumpellin [Source:Projected from Anopheles gambiae (AGAP007019) VB Community Annotation]	NA	No	AFUN000585	381.591	0.466125	0.16153	2.88569	0.00390554	2.40832	0.0122593	1.91153	x	AFUN000585	267.222	0.375608	0.645344	0.582027	0.560549	0.251387	0.960087	0.0176896		AFUN000585	355.363	0.161606	0.19444	0.831133	0.405899	0.391583	1	0
AFUN000586	18304745	18311615	6871	others	No	cDNA	AFUN000586	others	Homeobox domain-containing protein [Source:UniProtKB/TrEMBL;Acc:A0A182R345]	NA	No	AFUN000586	1422.52	-0.241432	0.138778	-1.7397	0.081912	1.08665	0.153764	0.813145		AFUN000586	1061.51	-0.126495	0.562029	-0.225069	0.821925	0.0851676	0.985365	0.00640266		AFUN000586	1278.4	0.00368982	0.162298	0.0227349	0.981862	0.00794966	1	0
AFUN000588	18292478	18294521	2044	others	No	cDNA	AFUN000588	others	Amino_oxidase domain-containing protein [Source:UniProtKB/TrEMBL;Acc:A0A182R347]	NA	No	AFUN000588	4.88799	0.669636	0.852537	0.785463	0.432182	0.364333	0.556604	0.254454		AFUN000588	1.59356	-1.57398	4.82646	-0.326116	0.744337	0.12823	1	0		AFUN000588	3.89424	2.0005	1.4552	1.37472	0.169217	0.771555	1	0
AFUN000592	18228896	18240143	11248	others	No	cDNA	AFUN000592	others	unspecified product	NA	No	AFUN000592	765.632	0.603109	0.15654	3.85274	0.000116802	3.93255	0.000575354	3.24007	x	AFUN000592	552.183	0.561376	0.589653	0.952044	0.341075	0.467151	0.881636	0.0547108		AFUN000592	725.418	0.105061	0.186709	0.562699	0.57364	0.241361	1	0
AFUN000593	18154954	18155924	971	others	No	cDNA	AFUN000593	others	Peptidase S1 domain-containing protein [Source:UniProtKB/TrEMBL;Acc:A0A182R352]	NA	No	AFUN000593	1.2582	-3.01577	1.94023	-1.55433	0.120105	0.92044	0.208785	0.680302		AFUN000593	1.68936	-4.55819	5.17461	-0.880875	0.378385	0.422066	1	0		AFUN000593	0.431609	0.487958	4.08048	0.119584	0.904813	0.0434411	1	0
AFUN000597	18083761	18085978	2218	others	No	cDNA	AFUN000597	others	unspecified product	NA	No	AFUN000597	166.632	-3.6876	0.71403	-5.16449	2.41101e-07	6.6178	2.25599e-06	5.64666	x	AFUN000597	90.0723	-2.62774	0.98022	-2.68077	0.00734536	2.13399	0.118352	0.926824		AFUN000597	120.156	-0.347216	0.894638	-0.388108	0.697936	0.156184	1	0
AFUN000601	17208857	17212378	3522	others	No	cDNA	AFUN000601	others	unspecified product	NA	No	AFUN000601	766.997	0.728704	0.105521	6.90576	4.99346e-12	11.3016	9.8962e-11	10.0045	x	AFUN000601	567.985	0.63631	0.598041	1.06399	0.287333	0.541615	0.854291	0.0683943		AFUN000601	733.141	0.0743592	0.153915	0.483118	0.629012	0.201341	1	0
AFUN000602	17206296	17207028	733	others	No	cDNA	RpL26	others	60S ribosomal protein L26	RpL26	No	AFUN000602	4393.81	0.526702	0.234221	2.24874	0.0245288	1.61032	0.0573551	1.24143		AFUN000602	3481.58	0.469164	0.540226	0.868459	0.385143	0.414378	0.901945	0.0448199		AFUN000602	4187.97	-0.0264132	0.272979	-0.0967591	0.922918	0.034837	1	0
AFUN000603	17204539	17206291	1753	others	No	cDNA	AFUN000603	others	unspecified product	NA	No	AFUN000603	53.7886	0.57195	0.323696	1.76693	0.0772394	1.11216	0.14648	0.834223		AFUN000603	30.6881	0.635024	1.20321	0.527775	0.597656	0.223549	0.965995	0.015025		AFUN000603	49.7355	0.409353	0.378059	1.08278	0.278908	0.554539	1	0
AFUN000604	17200070	17203375	3306	others	No	cDNA	AFUN000604	others	unspecified product	NA	No	AFUN000604	310.456	1.34666	0.197467	6.81969	9.12353e-12	11.0398	1.71999e-10	9.76447	x	AFUN000604	212.256	1.08481	0.712652	1.52221	0.127955	0.892941	0.675429	0.17042		AFUN000604	301.429	0.211216	0.277688	0.760621	0.446883	0.349806	1	0
AFUN000605	17197554	17198831	1278	others	No	cDNA	mRpL27	others	39S ribosomal protein L27, mitochondrial	mRpL27	No	AFUN000605	91.7803	0.903606	0.31288	2.88803	0.0038766	2.41155	0.0121775	1.91444	x	AFUN000605	61.1087	0.246999	0.932638	0.264839	0.791134	0.10175	0.985365	0.00640266		AFUN000605	84.1903	0.378188	0.36339	1.04072	0.298005	0.525776	1	0
AFUN000606	17196392	17197403	1012	others	No	cDNA	AFUN000606	others	unspecified product	NA	No	AFUN000606	14.0019	-0.0557429	0.4899	-0.113784	0.909409	0.0412408	0.941727	0.026075		AFUN000606	13.4864	1.3784	1.71641	0.803073	0.421932	0.374757	0.921417	0.0355437		AFUN000606	14.744	-0.663968	0.541804	-1.22548	0.220396	0.656796	1	0
AFUN000607	17191283	17195487	4205	others	No	cDNA	AFUN000607	others	DNA damage-binding protein [Source:Projected from Anopheles gambiae (AGAP002472) VB Community Annotation]	NA	No	AFUN000607	975.969	0.238716	0.152062	1.56986	0.116447	0.933873	0.20373	0.690945		AFUN000607	639.555	0.0809866	0.607487	0.133314	0.893945	0.0486892	0.991316	0.00378768		AFUN000607	882.326	0.278517	0.216646	1.28558	0.198589	0.702046	1	0
AFUN000608	17190133	17191178	1046	others	No	cDNA	AFUN000608	others	V-type proton ATPase subunit F [Source:UniProtKB/TrEMBL;Acc:A0A182R367]	NA	No	AFUN000608	792.958	0.0213316	0.211084	0.101057	0.919505	0.036446	0.947569	0.0233892		AFUN000608	674.549	-0.425235	0.583854	-0.728324	0.466415	0.331227	0.930455	0.0313047		AFUN000608	697.949	0.0173028	0.188985	0.0915562	0.927051	0.0328965	1	0
AFUN000609	17187154	17189798	2645	others	No	cDNA	AFUN000609	others	Cleavage and polyadenylation specificity factor subunit 2 [Source:UniProtKB/TrEMBL;Acc:A0A182R368]	NA	No	AFUN000609	236.281	-0.382634	0.191566	-1.99739	0.0457825	1.3393	0.0957434	1.01889		AFUN000609	132.812	-0.476036	0.755604	-0.630006	0.52869	0.276799	0.951724	0.021489		AFUN000609	202.341	0.478883	0.221702	2.16003	0.0307704	1.51187	1	0
AFUN000610	17184693	17187164	2472	others	No	cDNA	AFUN000610	others	unspecified product	NA	No	AFUN000610	231.675	-0.598299	0.270474	-2.21204	0.0269641	1.56921	0.0619407	1.20802		AFUN000610	150.279	-0.681144	0.721601	-0.943934	0.345203	0.461925	0.884113	0.0534923		AFUN000610	196.002	0.28577	0.322713	0.885524	0.375874	0.424957	1	0
AFUN000612	17174306	17178468	4163	others	No	cDNA	AFUN000612	others	cyclin B [Source:Projected from Anopheles gambiae (AGAP002478) VB Community Annotation]	NA	No	AFUN000612	839.682	-0.0793349	0.343491	-0.230967	0.817341	0.0875968	0.875658	0.0576656		AFUN000612	439.922	0.361646	0.637309	0.567457	0.570404	0.243818	0.962851	0.0164408		AFUN000612	757.749	0.416261	0.354079	1.17562	0.239748	0.620245	1	0
AFUN000613	17165342	17173784	8443	others	No	cDNA	AFUN000613	others	5-aminolevulinate synthase [Source:UniProtKB/TrEMBL;Acc:A0A4Y0AL89]	NA	No	AFUN000613	1248.59	0.429658	0.195376	2.19914	0.0278681	1.55489	0.0636583	1.19615		AFUN000613	952.608	-0.0704013	0.566536	-0.124266	0.901105	0.0452248	0.991504	0.00370554		AFUN000613	1130.31	0.165947	0.19173	0.865526	0.38675	0.412569	1	0
AFUN000614	17163386	17164612	1227	others	No	cDNA	AFUN000614	others	protein transport protein SEC13 [Source:Projected from Anopheles gambiae (AGAP003183) VB Community Annotation]	NA	No	AFUN000614	135.296	-0.434587	0.303817	-1.43042	0.152595	0.816459	0.251754	0.599023		AFUN000614	107.223	-0.0704507	0.784635	-0.089788	0.928456	0.0322388	0.993824	0.00269058		AFUN000614	122.897	-0.175603	0.360167	-0.48756	0.625862	0.203522	1	0
AFUN000616	17443330	17450267	6938	others	No	cDNA	AFUN000616	others	cyclin-dependent kinase-like [Source:Projected from Anopheles gambiae (AGAP003180) VB Community Annotation]	NA	No	AFUN000616	43.89	-0.213227	0.256582	-0.83103	0.405957	0.39152	0.531135	0.274795		AFUN000616	28.6263	-0.283548	1.24419	-0.227898	0.819726	0.0863313	0.985365	0.00640266		AFUN000616	38.4712	0.240112	0.360261	0.666495	0.505095	0.296627	1	0
AFUN000617	17444689	17445287	599	others	No	cDNA	AFUN000617	others	unspecified product	NA	No	AFUN000617	1.67283	-0.657555	2.1512	-0.305669	0.759857	0.119268	0.831452	0.080163		AFUN000617	0	NA	NA	NA	NA	#VALUE!	1	0		AFUN000617	1.37161	2.34611	2.96138	0.792236	0.428223	0.36833	1	0
AFUN000618	17450531	17454763	4233	others	No	cDNA	AFUN000618	others	E3 ubiquitin-protein ligase synoviolin [Source:Projected from Anopheles gambiae (AGAP003179) VB Community Annotation]	NA	No	AFUN000618	805.236	0.378678	0.105835	3.57801	0.000346217	3.46065	0.00149992	2.82393	x	AFUN000618	629.349	0.487006	0.604757	0.805291	0.420652	0.376077	0.920811	0.0358297		AFUN000618	766.968	-0.0546179	0.179051	-0.305041	0.760335	0.118995	1	0
AFUN000619	17455200	17456051	852	others	No	cDNA	GRX2	others	glutaredoxin	GRX2	No	AFUN000619	104.63	0.602577	0.287866	2.09326	0.0363263	1.43978	0.0791282	1.10167		AFUN000619	98.7741	1.01694	0.81465	1.24831	0.211916	0.673836	0.790386	0.102161		AFUN000619	107.118	-0.381931	0.343231	-1.11275	0.265814	0.575422	1	0
AFUN000620	17456061	17459824	3764	others	No	cDNA	AFUN000620	others	Rho-GAP domain-containing protein [Source:UniProtKB/TrEMBL;Acc:A0A182R379]	NA	No	AFUN000620	244.693	-0.345559	0.222621	-1.55223	0.120606	0.91863	0.209462	0.678894		AFUN000620	164.585	-0.198357	0.741156	-0.267632	0.788983	0.102933	0.985365	0.00640266		AFUN000620	216.589	0.130864	0.294667	0.444109	0.656963	0.182459	1	0
AFUN000621	17460302	17462384	2083	others	No	cDNA	AFUN000621	others	Upstream transcription factor 2/L-myc-2 [Source:Projected from Anopheles gambiae (AGAP003177) VB Community Annotation]	NA	No	AFUN000621	682.936	-0.288801	0.162688	-1.77518	0.0758689	1.11994	0.144589	0.839864		AFUN000621	557.682	-0.248629	0.590618	-0.420964	0.673781	0.171481	0.982495	0.00766973		AFUN000621	611.036	-0.0987815	0.198953	-0.496506	0.619538	0.207932	1	0
AFUN000622	17463176	17466649	3474	others	No	cDNA	AFUN000622	others	solute carrier family 23 (nucleobase transporter) [Source:Projected from Anopheles gambiae (AGAP003176) VB Community Annotation]	NA	No	AFUN000622	142.668	0.847232	0.258598	3.27625	0.00105195	2.978	0.00391255	2.40754	x	AFUN000622	117.951	0.800798	0.767519	1.04336	0.296782	0.527562	0.857797	0.0666153		AFUN000622	140.359	-0.0925797	0.299633	-0.308977	0.757339	0.12071	1	0
AFUN000623	17466969	17500628	33660	others	No	cDNA	AFUN000623	others	Protein kinase domain-containing protein [Source:UniProtKB/TrEMBL;Acc:A0A182R382]	NA	No	AFUN000623	1355.24	-0.081563	0.125435	-0.650243	0.515535	0.287742	0.630906	0.200036		AFUN000623	1094.78	-0.14766	0.560593	-0.2634	0.792242	0.101142	0.985365	0.00640266		AFUN000623	1224.04	-0.0463193	0.144262	-0.321078	0.748151	0.12601	1	0
AFUN000624	17501846	17503335	1490	others	No	cDNA	AFUN000624	others	nucleolar protein [Source:Projected from Anopheles gambiae (AGAP003171) VB Community Annotation]	NA	No	AFUN000624	1981.78	-0.35743	0.14851	-2.40677	0.0160943	1.79333	0.0403083	1.39461	x	AFUN000624	1665.59	-0.237714	0.556808	-0.426922	0.669436	0.174291	0.981802	0.00797592		AFUN000624	1779.45	-0.172722	0.186799	-0.924642	0.355152	0.449586	1	0
AFUN000625	17503680	17505392	1713	others	No	cDNA	AFUN000625	others	unspecified product	NA	No	AFUN000625	70.2003	0.495384	0.271962	1.82152	0.0685274	1.16414	0.133042	0.876012		AFUN000625	45.5196	0.476661	1.05788	0.450582	0.652291	0.185559	0.977086	0.0100671		AFUN000625	65.2317	0.236487	0.357387	0.66171	0.508157	0.294002	1	0
AFUN000626	17505413	17508241	2829	others	No	cDNA	AFUN000626	others	Isocitrate dehydrogenase [NADP] [Source:UniProtKB/TrEMBL;Acc:A0A182R385]	NA	No	AFUN000626	3077.19	0.621543	0.424854	1.46296	0.143479	0.843211	0.240381	0.619099		AFUN000626	1672.48	0.251858	0.62718	0.401572	0.687999	0.162412	0.982577	0.00763328		AFUN000626	2768.82	0.602831	0.517719	1.1644	0.244262	0.612144	1	0
AFUN000627	17513830	17519255	5426	others	No	cDNA	AFUN000627	others	NAD(P) transhydrogenase [Source:Projected from Anopheles gambiae (AGAP003167) VB Community Annotation]	NA	No	AFUN000627	1188.98	0.345345	0.260253	1.32696	0.184523	0.733949	0.292519	0.533846		AFUN000627	719.382	0.307903	0.612584	0.502631	0.615224	0.210967	0.969848	0.0132962		AFUN000627	1084.4	0.357415	0.318096	1.12361	0.261178	0.583063	1	0
AFUN000628	17519446	17525386	5941	others	No	cDNA	AFUN000628	others	unspecified product	NA	No	AFUN000628	17.2376	-0.789034	0.555768	-1.41972	0.15569	0.80774	0.255703	0.592264		AFUN000628	9.34626	-1.23125	2.00296	-0.614713	0.538744	0.268617	0.954252	0.0203369		AFUN000628	13.8701	0.699713	0.782875	0.893774	0.371443	0.430108	1	0
AFUN000631	17549072	17562408	13337	others	No	cDNA	AFUN000631	others	unspecified product	NA	No	AFUN000631	448.927	0.425831	0.472043	0.902102	0.367003	0.435331	0.491249	0.308698		AFUN000631	431.076	0.665128	0.617371	1.07736	0.281321	0.550797	0.850362	0.070396		AFUN000631	448.369	-0.379457	0.54773	-0.692781	0.488447	0.311182	1	0
AFUN000632	17562744	17578051	15308	others	No	cDNA	AFUN000632	others	unspecified product	NA	No	AFUN000632	2.44577	-0.375139	1.10675	-0.338955	0.734643	0.133923	0.813558	0.0896116		AFUN000632	2.0532	0.726852	4.37845	0.166007	0.868152	0.0614044	1	0		AFUN000632	2.39391	-0.548007	1.49722	-0.366016	0.714353	0.146087	1	0
AFUN000634	91549274	91550555	1282	others	No	cDNA	AFUN000634	others	aurora kinase, other [Source:Projected from Anopheles gambiae (AGAP007855) VB Community Annotation]	NA	No	AFUN000634	70.5257	1.47803	0.4296	3.44048	0.000580674	3.23607	0.00233864	2.63104	x	AFUN000634	32.335	1.78737	1.21655	1.46921	0.141776	0.848397	0.702149	0.153571		AFUN000634	66.4515	0.694849	0.458276	1.51622	0.129463	0.887855	1	0
AFUN000638	91575287	91580512	5226	others	No	cDNA	AFUN000638	others	Aconitate hydratase, mitochondrial [Source:UniProtKB/TrEMBL;Acc:A0A182R397]	NA	No	AFUN000638	15435.7	0.303554	0.588201	0.516072	0.605804	0.217668	0.707141	0.150494		AFUN000638	11627.2	-0.428344	0.694679	-0.616607	0.537494	0.269626	0.954252	0.0203369		AFUN000638	13478.3	0.284442	0.710187	0.400517	0.688776	0.161922	1	0
AFUN000639	91581733	91582497	765	others	No	cDNA	AFUN000639	others	unspecified product	NA	No	AFUN000639	7.43091	-1.52556	1.0241	-1.48965	0.136315	0.865455	0.230834	0.636701		AFUN000639	6.23084	-1.23066	2.39588	-0.513655	0.607493	0.216459	0.969848	0.0132962		AFUN000639	5.91028	-0.306762	1.30833	-0.234469	0.814621	0.0890444	1	0
AFUN000640	91583301	91583853	553	others	No	cDNA	AFUN000640	others	unspecified product	NA	No	AFUN000640	3.40754	-1.46725	1.0326	-1.42092	0.155339	0.80872	0.255225	0.593076		AFUN000640	3.11756	0.718701	3.27464	0.219475	0.82628	0.0828727	0.985365	0.00640266		AFUN000640	3.39089	-1.09237	1.23123	-0.887219	0.374961	0.426014	1	0
AFUN000645	91671374	91672559	1186	others	No	cDNA	AFUN000645	others	unspecified product	NA	No	AFUN000645	9.16615	-0.691563	0.637821	-1.08426	0.27825	0.555564	0.400734	0.397143		AFUN000645	8.33439	-0.798946	2.09714	-0.38097	0.703225	0.152905	0.982577	0.00763328		AFUN000645	7.7394	-0.175348	0.842697	-0.208079	0.835167	0.0782267	1	0
AFUN000646	91682144	91731283	49140	others	No	cDNA	AFUN000646	others	dual specificity tyrosine-phosphorylation-regulated kinase [Source:Projected from Anopheles gambiae (AGAP007847) VB Community Annotation]	NA	No	AFUN000646	1786.86	-0.913141	0.252609	-3.61484	0.000300533	3.52211	0.00132677	2.8772	x	AFUN000646	1341.53	-1.31656	0.603019	-2.18329	0.0290146	1.53738	0.309261	0.509674		AFUN000646	1413.92	0.245305	0.327646	0.748689	0.454045	0.342901	1	0
AFUN000648	91740583	91841267	100685	others	No	cDNA	AFUN000648	others	unspecified product	NA	No	AFUN000648	199.033	-0.184369	0.345589	-0.533492	0.593693	0.226438	0.697167	0.156663		AFUN000648	170.354	-0.0196092	0.755001	-0.0259725	0.979279	0.00909342	0.997711	0.000995067		AFUN000648	183.23	-0.206772	0.44166	-0.468171	0.639662	0.194049	1	0
AFUN000650	91843362	91844519	1158	others	No	cDNA	AFUN000650	others	endonuclease G, mitochondrial [Source:Projected from Anopheles gambiae (AGAP007845) VB Community Annotation]	NA	No	AFUN000650	125.773	-0.249752	0.313744	-0.796036	0.426011	0.370579	0.550768	0.259031		AFUN000650	123.626	-0.701639	0.767197	-0.914549	0.360428	0.443181	0.888523	0.0513313		AFUN000650	107.709	-0.174053	0.293739	-0.592544	0.553486	0.256893	1	0
AFUN000651	91844660	91847064	2405	others	No	cDNA	AFUN000651	others	aspartyl-tRNA synthetase [Source:Projected from Anopheles gambiae (AGAP007844) VB Community Annotation]	NA	No	AFUN000651	131.434	0.117649	0.192189	0.612153	0.540437	0.267255	0.651885	0.185829		AFUN000651	106.134	0.565043	0.792238	0.713223	0.475708	0.32266	0.932593	0.030308		AFUN000651	126.569	-0.185419	0.226999	-0.816829	0.414026	0.382972	1	0
AFUN000652	91847121	91852541	5421	others	No	cDNA	AFUN000652	others	O-acyltransferase [Source:UniProtKB/TrEMBL;Acc:A0A182R3B1]	NA	No	AFUN000652	624.752	1.83706	0.253506	7.24662	4.27316e-13	12.3693	1.00479e-11	10.9979	x	AFUN000652	621.357	2.64253	0.645676	4.09266	4.26452e-05	4.37013	0.00154602	2.81078	x	AFUN000652	700.942	-0.448031	0.322268	-1.39024	0.164455	0.783952	1	0
AFUN000653	91853843	91854740	898	others	No	cDNA	AFUN000653	others	F-type H+-transporting ATPase subunit delta [Source:Projected from Anopheles gambiae (AGAP007841) VB Community Annotation]	NA	No	AFUN000653	2454.53	-0.469678	0.414405	-1.13338	0.257055	0.589974	0.377317	0.423294		AFUN000653	2551.63	-1.02241	0.556281	-1.83794	0.0660708	1.17999	0.510616	0.291906		AFUN000653	2007.4	-0.18069	0.402411	-0.449019	0.653418	0.184809	1	0
AFUN000658	92166419	92172021	5603	others	No	cDNA	AFUN000658	others	unspecified product	NA	No	AFUN000658	1346.36	0.68085	0.0990738	6.87215	6.32435e-12	11.199	1.23233e-10	9.90927	x	AFUN000658	984.273	0.660921	0.568089	1.16341	0.244663	0.611432	0.820385	0.0859821		AFUN000658	1286.87	0.0775204	0.129664	0.597856	0.549936	0.259688	1	0
AFUN000659	92172490	92174528	2039	others	No	cDNA	AFUN000659	others	Tubulin gamma chain [Source:UniProtKB/TrEMBL;Acc:A0A182R3B8]	NA	No	AFUN000659	201.775	-0.696684	0.16196	-4.30159	1.6958e-05	4.77062	0.000103706	3.98419	x	AFUN000659	148.462	-0.730705	0.723027	-1.01062	0.312199	0.505568	0.86717	0.0618956		AFUN000659	170.488	0.080277	0.212375	0.377997	0.705433	0.151544	1	0
AFUN000660	92174780	92181194	6415	others	No	cDNA	AFUN000660	others	CAP-ZIP_m domain-containing protein [Source:UniProtKB/TrEMBL;Acc:A0A182R3B9]	NA	No	AFUN000660	697.876	0.148612	0.141656	1.04911	0.294128	0.531463	0.417664	0.379173		AFUN000660	529.14	0.197006	0.593227	0.332092	0.73982	0.130874	0.984947	0.00658717		AFUN000660	646.612	0.00596743	0.173752	0.0343445	0.972602	0.0120646	1	0
AFUN000661	92181572	92184929	3358	others	No	cDNA	AFUN000661	others	PRKCA-binding protein [Source:Projected from Anopheles gambiae (AGAP007832) VB Community Annotation]	NA	No	AFUN000661	102.085	-1.29565	0.308161	-4.20444	2.61726e-05	4.58215	0.000153511	3.81386	x	AFUN000661	67.3169	-1.48481	1.02293	-1.45153	0.146633	0.833769	0.706074	0.15115		AFUN000661	79.9032	0.349203	0.501902	0.695759	0.48658	0.312846	1	0
AFUN000662	92184945	92202629	17685	others	No	cDNA	AFUN000662	others	unspecified product	NA	No	AFUN000662	129.07	0.0601177	0.26152	0.229878	0.818187	0.0871475	0.876124	0.0574345		AFUN000662	102.848	-0.0428857	0.797536	-0.0537728	0.957116	0.0190353	0.995906	0.00178163		AFUN000662	117.626	-0.0213511	0.318982	-0.0669353	0.946633	0.0238183	1	0
AFUN000665	92274943	92334283	59341	others	No	cDNA	AFUN000665	others	unspecified product	NA	No	AFUN000665	1207.86	0.516253	0.236321	2.18454	0.0289225	1.53876	0.0656596	1.1827		AFUN000665	752.902	0.462669	0.6286	0.736031	0.461712	0.335629	0.929756	0.031631		AFUN000665	1116.29	0.317419	0.31249	1.01578	0.309736	0.509008	1	0
AFUN000667	39939450	39941185	1736	others	No	cDNA	AFUN000667	others	unspecified product	NA	No	AFUN000667	0.209255	-1.61446	3.46572	-0.465838	0.641331	0.192917	1	0		AFUN000667	0.482674	-2.75089	5.85998	-0.469437	0.638757	0.194664	1	0		AFUN000667	0	NA	NA	NA	NA	#VALUE!	1	0
AFUN000668	39989898	39990346	449	others	No	cDNA	AFUN000668	others	DUF4219 domain-containing protein [Source:UniProtKB/TrEMBL;Acc:A0A182R3C7]	NA	No	AFUN000668	0.209255	-1.61446	3.46572	-0.465838	0.641331	0.192917	1	0		AFUN000668	0.482674	-2.75089	5.85998	-0.469437	0.638757	0.194664	1	0		AFUN000668	0	NA	NA	NA	NA	#VALUE!	1	0
AFUN000669	39996934	40031494	34561	others	No	cDNA	AFUN000669	others	3'-5' exonuclease domain-containing protein [Source:UniProtKB/TrEMBL;Acc:A0A182R3C8]	NA	No	AFUN000669	2954.61	0.132752	0.131733	1.00773	0.313583	0.503647	0.438124	0.358403		AFUN000669	2034.36	-0.150571	0.561378	-0.268217	0.788532	0.10318	0.985365	0.00640266		AFUN000669	2631.83	0.255034	0.182226	1.39954	0.16165	0.791425	1	0
AFUN000676	40176960	40180787	3828	others	No	cDNA	AFUN000676	others	polynucleotide 5'-hydroxyl-kinase GRC3/NOL9 [Source:Projected from Anopheles gambiae (AGAP005161) VB Community Annotation]	NA	No	AFUN000676	818.003	-0.130315	0.110336	-1.18107	0.237575	0.624199	0.355472	0.449195		AFUN000676	648.688	-0.141948	0.595038	-0.238552	0.811453	0.0907367	0.985365	0.00640266		AFUN000676	737.928	-0.0426228	0.167641	-0.25425	0.799303	0.0972888	1	0
AFUN000679	40270911	40273123	2213	UGTs	Yes	cDNA	AFUN000679	UGTs	glucosyl/glucuronosyl transferases [Source:Projected from Anopheles gambiae (AGAP005163) VB Community Annotation]	UGT315A3	Yes	AFUN000679	5.4742	-4.04398	0.946374	-4.27313	1.92751e-05	4.715	0.000115932	3.9358	x	AFUN000679	4.4896	-3.52759	3.10198	-1.13721	0.255452	0.592691	0.825231	0.0834247		AFUN000679	3.34001	-0.63066	1.67867	-0.375689	0.707148	0.15049	1	0
AFUN000680	40317475	40317812	338	others	No	cDNA	AFUN000680	others	unspecified product	NA	No	AFUN000680	0.0832134	-0.519413	3.53382	-0.146983	0.883145	0.0539679	1	0		AFUN000680	0	NA	NA	NA	NA	#VALUE!	1	0		AFUN000680	0.0683209	0	4.08048	0	1	0	1	0
AFUN000686	40469902	40593530	123629	others	No	cDNA	AFUN000686	others	unspecified product	NA	No	AFUN000686	682.263	-1.00817	0.230955	-4.36524	1.26983e-05	4.89625	8.03514e-05	4.09501	x	AFUN000686	493.233	-0.798055	0.61386	-1.30006	0.193581	0.713138	0.767483	0.114931		AFUN000686	572.196	-0.00874483	0.284163	-0.0307741	0.97545	0.0107951	1	0
AFUN000688	40536140	40542778	6639	others	No	cDNA	AFUN000688	others	unspecified product	NA	No	AFUN000688	130.947	-0.417291	0.220673	-1.89099	0.0586253	1.23191	0.117052	0.93162		AFUN000688	85.2055	-0.667659	0.855762	-0.780192	0.435278	0.361234	0.923499	0.0345635		AFUN000688	110.999	0.361633	0.306853	1.17852	0.238588	0.622351	1	0
AFUN000689	40604636	40606263	1628	others	No	cDNA	AFUN000689	others	Cytochrome b561 domain-containing protein [Source:UniProtKB/TrEMBL;Acc:A0A182R3E8]	NA	No	AFUN000689	5.76657	-1.32149	0.764136	-1.72939	0.0837385	1.07707	0.156434	0.80567		AFUN000689	15.3465	0.819355	1.61461	0.507462	0.61183	0.213369	0.969848	0.0132962		AFUN000689	7.78818	-2.5989	0.806431	-3.22272	0.00126978	2.89627	0.479612	0.31911
AFUN000690	40611632	40658154	46523	others	No	cDNA	AFUN000690	others	unspecified product	NA	No	AFUN000690	2466.39	0.836267	0.180411	4.63535	3.56334e-06	5.44814	2.54641e-05	4.59407	x	AFUN000690	1777.79	1.00191	0.579721	1.72827	0.0839403	1.07603	0.576587	0.239135		AFUN000690	2403.73	0.0598313	0.234648	0.254983	0.798737	0.0975964	1	0
AFUN000691	40617940	40622328	4389	others	No	cDNA	AFUN000691	others	unspecified product	NA	No	AFUN000691	108.885	-1.0791	0.200964	-5.3696	7.89123e-08	7.10286	8.05726e-07	6.09381	x	AFUN000691	89.5329	-1.20932	0.826604	-1.463	0.143467	0.843247	0.703711	0.152606		AFUN000691	87.0235	-0.0327183	0.264864	-0.123529	0.901689	0.0449435	1	0
AFUN000692	40660348	40665984	5637	others	No	cDNA	AFUN000692	others	Tctex1 domain-containing protein [Source:Projected from Anopheles gambiae (AGAP005171) VB Community Annotation]	NA	No	AFUN000692	6.00437	-1.00148	0.746505	-1.34156	0.17974	0.745355	0.286323	0.543143		AFUN000692	5.02415	-0.595278	2.62979	-0.22636	0.820922	0.0856983	0.985365	0.00640266		AFUN000692	5.16872	-0.338586	1.00025	-0.338503	0.734984	0.133722	1	0
AFUN000697	40712571	40714674	2104	others	No	cDNA	AFUN000697	others	unspecified product	NA	No	AFUN000697	95.9424	0.260796	0.21217	1.22918	0.219003	0.659549	0.333469	0.476944		AFUN000697	55.5504	0.314701	0.961325	0.327362	0.743394	0.128781	0.984947	0.00658717		AFUN000697	87.1692	0.397237	0.236832	1.67729	0.0934854	1.02926	1	0
AFUN000698	40715037	40716060	1024	others	No	cDNA	AFUN000698	others	unspecified product	NA	No	AFUN000698	1.08461	-1.75263	2.21388	-0.791653	0.428563	0.367985	0.553339	0.257009		AFUN000698	0	NA	NA	NA	NA	#VALUE!	1	0		AFUN000698	0.89005	1.09296	3.05181	0.358136	0.720242	0.142522	1	0
AFUN000699	40716095	40717333	1239	others	No	cDNA	AFUN000699	others	unspecified product	NA	No	AFUN000699	82.9699	-0.212578	0.328444	-0.647229	0.517484	0.286103	0.632568	0.198893		AFUN000699	61.3833	0.477936	0.964209	0.495677	0.620122	0.207523	0.969848	0.0132962		AFUN000699	78.4212	-0.143268	0.396933	-0.360937	0.718147	0.143787	1	0
AFUN000700	15295790	15307713	11924	others	No	cDNA	AFUN000700	others	wengen [Source:Projected from Anopheles gambiae (AGAP000728) VB Community Annotation]	NA	No	AFUN000700	434.013	-0.266555	0.20838	-1.27918	0.200834	0.697163	0.312579	0.505041		AFUN000700	356.391	-0.298762	0.637366	-0.468746	0.639252	0.194328	0.972912	0.0119264		AFUN000700	386.498	-0.0782829	0.267689	-0.29244	0.76995	0.113537	1	0
AFUN000701	15309022	15346821	37800	others	No	cDNA	AFUN000701	others	unspecified product	NA	No	AFUN000701	3662.25	0.592624	0.2032	2.91645	0.00354034	2.45095	0.0112654	1.94825	x	AFUN000701	2546.67	0.508388	0.612799	0.829615	0.406756	0.390666	0.914384	0.0388715		AFUN000701	3440.11	0.168207	0.303147	0.554868	0.578985	0.237333	1	0
AFUN000704	15350367	15352944	2578	others	No	cDNA	AFUN000704	others	unspecified product	NA	No	AFUN000704	93.4928	-0.622512	0.42444	-1.46667	0.142466	0.846288	0.238966	0.621663		AFUN000704	67.8152	-0.0964625	0.903868	-0.106722	0.91501	0.0385744	0.992119	0.00343612		AFUN000704	84.0243	-0.119991	0.496174	-0.241833	0.80891	0.0920999	1	0
AFUN000705	15354266	15361876	7611	others	No	cDNA	AFUN000705	others	cytoplasmic dynein 1 light intermediate chain [Source:Projected from Anopheles gambiae (AGAP000723) VB Community Annotation]	NA	No	AFUN000705	1754.82	0.56416	0.191726	2.94254	0.00325535	2.4874	0.0104893	1.97925	x	AFUN000705	1368.96	0.539854	0.591214	0.913129	0.361175	0.442283	0.888523	0.0513313		AFUN000705	1677.88	-0.0134508	0.263784	-0.0509917	0.959332	0.018031	1	0
AFUN000706	15362396	15365227	2832	others	No	cDNA	AFUN000706	others	V-type proton ATPase subunit [Source:UniProtKB/TrEMBL;Acc:A0A182R3G5]	NA	No	AFUN000706	1543.28	1.9163	0.254068	7.54244	4.61264e-14	13.3361	1.25525e-12	11.9013	x	AFUN000706	1208.89	1.9817	0.57771	3.43027	0.000602978	3.2197	0.0153179	1.8148	x	AFUN000706	1600.1	-0.0326451	0.308669	-0.105761	0.915772	0.0382125	1	0
AFUN000707	15371391	15410351	38961	others	No	cDNA	AFUN000707	others	neuronal cell adhesion molecule [Source:Projected from Anopheles gambiae (AGAP000720) VB Community Annotation]	NA	No	AFUN000707	3874.03	-0.0864335	0.136005	-0.635518	0.525091	0.279766	0.638808	0.19463		AFUN000707	3235.86	0.241501	0.548549	0.440255	0.659753	0.180619	0.979146	0.00915236		AFUN000707	3646.39	-0.222654	0.171672	-1.29697	0.19464	0.710768	1	0
AFUN000708	15412515	15415837	3323	others	No	cDNA	AFUN000708	others	Adenosylhomocysteinase [Source:UniProtKB/TrEMBL;Acc:A0A182R3G7]	NA	No	AFUN000708	1876.26	-1.1527	0.25231	-4.56859	4.91011e-06	5.30891	3.39479e-05	4.46919	x	AFUN000708	1375.61	-1.5363	0.679817	-2.25988	0.0238289	1.6229	0.269129	0.570039		AFUN000708	1449.49	0.284813	0.392667	0.725329	0.46825	0.329522	1	0
AFUN000711	15423861	15433635	9775	others	No	cDNA	AFUN000711	others	unspecified product	NA	No	AFUN000711	701.954	0.622586	0.208575	2.98496	0.00283619	2.54726	0.0093007	2.03148	x	AFUN000711	468.873	0.135751	0.624058	0.21753	0.827795	0.082077	0.985365	0.00640266		AFUN000711	638.445	0.337558	0.267398	1.26238	0.206812	0.684423	1	0
AFUN000712	15527655	15570422	42768	others	No	cDNA	AFUN000712	others	Alpha-carbonic anhydrase domain-containing protein [Source:UniProtKB/TrEMBL;Acc:A0A182R3H1]	NA	No	AFUN000712	276.021	-0.476451	0.295856	-1.61041	0.107308	0.969368	0.191014	0.718934		AFUN000712	209.539	-0.277414	0.772097	-0.3593	0.719371	0.143047	0.984947	0.00658717		AFUN000712	244.933	-0.0540534	0.42592	-0.12691	0.899012	0.0462345	1	0
AFUN000713	4803025	4831122	28098	others	No	cDNA	AFUN000713	others	protein flightin [Source:Projected from Anopheles gambiae (AGAP007249) VB Community Annotation]	NA	No	AFUN000713	470.992	0.58238	0.354639	1.64218	0.100553	0.997604	0.181564	0.74097		AFUN000713	473.013	0.530439	0.598328	0.886535	0.375329	0.425588	0.896789	0.0473097		AFUN000713	468.332	-0.370387	0.384768	-0.962626	0.335735	0.474003	1	0
AFUN000714	4837398	4945073	107676	others	No	cDNA	AFUN000714	others	hippocalcin-like protein [Source:Projected from Anopheles gambiae (AGAP007247) VB Community Annotation]	NA	No	AFUN000714	2358.73	-0.715035	0.12238	-5.84274	5.13484e-09	8.28947	6.4314e-08	7.19169	x	AFUN000714	1826.01	-0.675478	0.560239	-1.2057	0.227935	0.64219	0.801353	0.0961763		AFUN000714	2008.53	-0.024617	0.170887	-0.144054	0.885457	0.0528323	1	0
AFUN000718	4945942	4946743	802	others	No	cDNA	AFUN000718	others	Small nuclear ribonucleoprotein Sm D1 [Source:UniProtKB/TrEMBL;Acc:A0A182R3H7]	NA	No	AFUN000718	80.041	2.55163	0.296609	8.60269	7.78725e-18	17.1086	3.46302e-16	15.4605	x	AFUN000718	69.0071	2.89754	0.945876	3.06334	0.00218879	2.6598	0.0459099	1.33809	x	AFUN000718	87.154	-0.192875	0.301241	-0.640268	0.521998	0.282331	1	0
AFUN000720	4954279	4955016	738	others	No	cDNA	AFUN000720	others	BHLH domain-containing protein [Source:UniProtKB/TrEMBL;Acc:A0A182R3H9]	NA	No	AFUN000720	5.72873	-0.241168	0.846799	-0.284799	0.775798	0.110251	0.84175	0.0748167		AFUN000720	3.86675	-0.287948	3.34767	-0.0860145	0.931455	0.0308382	0.994067	0.00258444		AFUN000720	5.04927	0.277755	1.3292	0.208964	0.834476	0.078586	1	0
AFUN000722	4959497	4960731	1235	others	No	cDNA	AFUN000722	others	acyl-coenzyme A thioesterase [Source:Projected from Anopheles gambiae (AGAP007238) VB Community Annotation]	NA	No	AFUN000722	133.402	-1.42329	0.379486	-3.75058	0.000176424	3.75344	0.000826615	3.0827	x	AFUN000722	150.297	-1.5363	0.756592	-2.03055	0.0423006	1.37365	0.389815	0.409141		AFUN000722	99.7631	-0.479841	0.419594	-1.14358	0.252797	0.597228	1	0
AFUN000725	4987875	5001872	13998	others	No	cDNA	AFUN000725	others	unspecified product	NA	No	AFUN000725	638.857	0.267923	0.157204	1.7043	0.0883246	1.05392	0.163138	0.787444		AFUN000725	427.648	-0.0612451	0.650485	-0.0941529	0.924988	0.0338641	0.99288	0.00310325		AFUN000725	572.029	0.301941	0.253266	1.19219	0.233188	0.632295	1	0
AFUN000726	5003684	5006562	2879	others	No	cDNA	AFUN000726	others	unspecified product	NA	No	AFUN000726	0.271054	-2.01288	3.43389	-0.58618	0.557754	0.253557	1	0		AFUN000726	0.241337	-1.75094	5.94809	-0.294371	0.768474	0.114371	1	0		AFUN000726	0.136642	0	4.08048	0	1	0	1	0
AFUN000727	5004095	5008032	3938	others	No	cDNA	AFUN000727	others	RPOL4c domain-containing protein [Source:UniProtKB/TrEMBL;Acc:A0A182R3I6]	NA	No	AFUN000727	16.1133	-2.26503	0.484802	-4.67207	2.98176e-06	5.52553	2.16968e-05	4.6636	x	AFUN000727	15.545	-3.30542	1.86858	-1.76895	0.0769023	1.11406	0.549784	0.259808		AFUN000727	9.47931	0.381085	0.840091	0.453624	0.6501	0.18702	1	0
AFUN000728	5008393	5009265	873	others	No	cDNA	AFUN000728	others	unspecified product	NA	No	AFUN000728	4.93766	0.925653	0.933636	0.99145	0.321466	0.492865	0.446304	0.350369		AFUN000728	5.87665	3.52764	2.95206	1.19498	0.232096	0.634332	0.808722	0.0922008		AFUN000728	5.97255	-0.854526	1.12112	-0.762206	0.445937	0.350726	1	0
AFUN000730	5015359	5017023	1665	others	No	cDNA	AFUN000730	others	unspecified product	NA	No	AFUN000730	4.82805	-2.20668	1.61133	-1.36947	0.170851	0.767382	0.275013	0.560648		AFUN000730	1.68936	-4.55819	5.17461	-0.880875	0.378385	0.422066	1	0		AFUN000730	3.36053	2.97244	2.73721	1.08594	0.277507	0.556726	1	0
AFUN000732	5031194	5031822	629	others	No	cDNA	AFUN000732	others	mitogen-activated protein-binding protein-interacting protein [Source:Projected from Anopheles gambiae (AGAP007213) VB Community Annotation]	NA	No	AFUN000732	54.5052	-0.73904	0.316434	-2.33552	0.0195161	1.70961	0.0475624	1.32274	x	AFUN000732	45.2432	-0.759912	1.03281	-0.73577	0.461871	0.335479	0.929766	0.0316263		AFUN000732	46.0617	-0.104641	0.404466	-0.258715	0.795855	0.0991661	1	0
AFUN000733	5032119	5036253	4135	others	No	cDNA	AFUN000733	others	ATP-dependent RNA helicase DHX8/PRP22 [Source:Projected from Anopheles gambiae (AGAP007212) VB Community Annotation]	NA	No	AFUN000733	368.584	-0.0412432	0.211574	-0.194935	0.845444	0.0729152	0.895098	0.0481297		AFUN000733	254.748	-0.104449	0.649989	-0.160693	0.872335	0.0593166	0.988212	0.00514969		AFUN000733	329.749	0.178206	0.251779	0.707788	0.479077	0.319594	1	0
AFUN000734	5036261	5037712	1452	others	No	cDNA	AFUN000734	others	RNA (guanine-9-)-methyltransferase domain-containing protein [Source:Projected from Anopheles gambiae (AGAP007211) VB Community Annotation]	NA	No	AFUN000734	172.751	-0.135576	0.179851	-0.753823	0.450955	0.345866	0.573718	0.241301		AFUN000734	139.231	-0.150623	0.735409	-0.204815	0.837717	0.0769028	0.985365	0.00640266		AFUN000734	155.935	-0.0641448	0.226414	-0.283307	0.776941	0.109612	1	0
AFUN000735	5038183	5050535	12353	others	No	cDNA	AFUN000735	others	Tetraspanin [Source:Projected from Anopheles gambiae (AGAP007210) UniProtKB/TrEMBL;Acc:Q7QJ21]	NA	No	AFUN000735	207.159	-0.0984824	0.184695	-0.533216	0.593884	0.226299	0.697187	0.156651		AFUN000735	163.789	-0.150505	0.717743	-0.209692	0.833908	0.0788818	0.985365	0.00640266		AFUN000735	186.745	-0.0140085	0.242915	-0.0576683	0.954013	0.0204458	1	0
AFUN000737	5063876	5064611	736	others	No	cDNA	AFUN000737	others	Oxidoreductase-like domain-containing protein [Source:UniProtKB/TrEMBL;Acc:A0A182R3J6]	NA	No	AFUN000737	94.7046	-1.31896	0.39188	-3.36571	0.00076347	3.11721	0.0029647	2.52802	x	AFUN000737	110.69	-0.979399	0.884651	-1.1071	0.26825	0.57146	0.840007	0.0757173		AFUN000737	78.1296	-0.773727	0.523505	-1.47798	0.139414	0.855692	1	0
AFUN000738	5095010	5106842	11833	others	No	cDNA	AFUN000738	others	DE-cadherin [Source:Projected from Anopheles gambiae (AGAP007203) VB Community Annotation]	NA	No	AFUN000738	2228.04	0.017402	0.219974	0.0791092	0.936946	0.0282855	0.958961	0.0181992		AFUN000738	1720.15	0.030306	0.56127	0.0539954	0.956939	0.0191158	0.995906	0.00178163		AFUN000738	2038.3	-0.00840436	0.268571	-0.0312929	0.975036	0.0109794	1	0
AFUN000739	5108019	5109468	1450	others	No	cDNA	AFUN000739	others	unspecified product	NA	No	AFUN000739	399.836	-0.510044	0.137809	-3.70109	0.000214676	3.66822	0.000982397	3.00771	x	AFUN000739	293.195	-0.571992	0.635348	-0.900282	0.36797	0.434187	0.892373	0.0494538		AFUN000739	343.495	0.0961748	0.175627	0.547607	0.583962	0.233616	1	0
AFUN000740	5109443	5110806	1364	others	No	cDNA	AFUN000740	others	RAT1-interacting protein [Source:Projected from Anopheles gambiae (AGAP007205) VB Community Annotation]	NA	No	AFUN000740	56.6537	0.253126	0.261761	0.967012	0.333538	0.476854	0.458624	0.338543		AFUN000740	33.7462	-0.454706	1.16637	-0.389848	0.696649	0.156986	0.982577	0.00763328		AFUN000740	48.7117	0.590003	0.363924	1.62123	0.104969	0.978939	1	0
AFUN000741	5111067	5115884	4818	others	No	cDNA	AFUN000741	others	E3 ubiquitin-protein ligase MARCH6 [Source:Projected from Anopheles gambiae (AGAP007204) VB Community Annotation]	NA	No	AFUN000741	1794.18	1.11623	0.135829	8.21789	2.07107e-16	15.6838	7.84363e-15	14.1055	x	AFUN000741	1359.27	0.999537	0.581595	1.71861	0.0856845	1.0671	0.582774	0.2345		AFUN000741	1762.61	0.0448026	0.20251	0.221236	0.824908	0.0835943	1	0
AFUN000742	5115961	5116934	974	others	No	cDNA	AFUN000742	others	unspecified product	NA	No	AFUN000742	515.929	-1.97043	0.169902	-11.5975	4.24505e-31	30.3721	5.70311e-29	28.2439	x	AFUN000742	421.087	-1.82938	0.617378	-2.96315	0.00304509	2.5164	0.05912	1.22827		AFUN000742	381.529	-0.171406	0.22807	-0.751551	0.452321	0.344553	1	0
AFUN000743	5116945	5117843	899	others	No	cDNA	TRX2	others	thioredoxin 2	TRX2	No	AFUN000743	477.319	-0.135071	0.230382	-0.586289	0.557681	0.253614	0.666325	0.176314		AFUN000743	393.098	-0.179628	0.611641	-0.293682	0.769001	0.114073	0.985365	0.00640266		AFUN000743	430.462	-0.0820223	0.270975	-0.302693	0.762124	0.117974	1	0
AFUN000744	5126407	5126562	156	others	No	cDNA	AFUN000744	others	unspecified product	NA	No	AFUN000744	0.277012	1.40415	3.53382	0.397347	0.691111	0.160452	1	0		AFUN000744	0	NA	NA	NA	NA	#VALUE!	1	0		AFUN000744	0.227044	0.487944	4.08048	0.11958	0.904816	0.0434398	1	0
AFUN000745	5144203	5192080	47878	others	No	cDNA	AFUN000745	others	unspecified product	NA	No	AFUN000745	3460.44	-0.337077	0.144806	-2.32778	0.0199238	1.70063	0.0484265	1.31492	x	AFUN000745	2506.45	-0.64978	0.55309	-1.17482	0.240067	0.619667	0.817766	0.0873711		AFUN000745	2947.48	0.216538	0.183043	1.18299	0.236812	0.625596	1	0
AFUN000746	5192472	5193078	607	others	No	cDNA	AFUN000746	others	Niemann-Pick Type C-2 [Source:Projected from Anopheles gambiae (AGAP007197) VB Community Annotation]	NA	No	AFUN000746	12.8324	-1.3424	0.423095	-3.17281	0.00150971	2.82111	0.00535382	2.27134	x	AFUN000746	9.54108	-1.19246	1.98002	-0.602245	0.547011	0.262004	0.95534	0.0198421		AFUN000746	10.3191	0.014397	0.653984	0.0220143	0.982437	0.00769549	1	0
AFUN000747	5193794	5194131	338	others	No	cDNA	AFUN000747	others	unspecified product	NA	No	AFUN000747	1.82999	-4.21178	2.19417	-1.91953	0.054917	1.26029	0.11092	0.954988		AFUN000747	0	NA	NA	NA	NA	#VALUE!	1	0		AFUN000747	1.50033	0.00706859	2.94079	0.00240364	0.998082	0.000833701	1	0
AFUN000749	5200213	5200523	311	others	No	cDNA	AFUN000749	others	unspecified product	NA	No	AFUN000749	0.312874	-0.845221	3.49462	-0.241863	0.808886	0.0921127	1	0		AFUN000749	0	NA	NA	NA	NA	#VALUE!	1	0		AFUN000749	0.256877	0.007068	4.08048	0.00173215	0.998618	0.000600634	1	0
AFUN000750	5201793	5202104	312	others	No	cDNA	AFUN000750	others	unspecified product	NA	No	AFUN000750	0.166427	-1.32611	3.49462	-0.379472	0.704337	0.152219	1	0		AFUN000750	0	NA	NA	NA	NA	#VALUE!	1	0		AFUN000750	0.136642	0	4.08048	0	1	0	1	0
AFUN000751	5202630	5202896	267	others	No	cDNA	AFUN000751	others	unspecified product	NA	No	AFUN000751	0.40535	-0.369272	2.58646	-0.142771	0.886471	0.0523356	1	0		AFUN000751	0.797851	3.16161	6.03491	0.523888	0.600357	0.221591	1	0		AFUN000751	0.615978	-1.96913	2.27001	-0.867456	0.385692	0.413759	1	0
AFUN000752	5204905	5205153	249	others	No	cDNA	AFUN000752	others	unspecified product	NA	No	AFUN000752	1.20331	0.195505	1.68056	0.116333	0.907388	0.0422068	0.940169	0.0267942		AFUN000752	0.241337	-1.75094	5.94809	-0.294371	0.768474	0.114371	1	0		AFUN000752	0.902086	2.14697	2.69839	0.795648	0.426237	0.370349	1	0
AFUN000753	5256851	5258428	1578	others	No	cDNA	AFUN000753	others	unspecified product	NA	No	AFUN000753	3.07042	-5.51526	1.4493	-3.80546	0.000141539	3.84912	0.000681172	3.16674	x	AFUN000753	2.89604	-5.33584	4.08813	-1.3052	0.191824	0.717097	0.764333	0.116717		AFUN000753	1.48849	0	3.44237	0	1	0	1	0
AFUN000755	5311682	5313043	1362	others	No	cDNA	AFUN000755	others	Glyco_18 domain-containing protein [Source:UniProtKB/TrEMBL;Acc:A0A182R3L4]	NA	No	AFUN000755	2.27362	-2.63835	1.43395	-1.83991	0.0657815	1.1819	0.128527	0.891007		AFUN000755	2.2448	-3.38481	4.20724	-0.804521	0.421096	0.375619	1	0		AFUN000755	1.29031	0.184484	2.45266	0.0752182	0.940041	0.0268532	1	0
AFUN000756	16434660	16442406	7747	others	No	cDNA	AFUN000756	others	Basic leucine zipper and W2 domain-containing protein [Source:Projected from Anopheles gambiae (AGAP002413) VB Community Annotation]	NA	No	AFUN000756	11780.6	-0.579465	0.149695	-3.87098	0.000108397	3.96498	0.000538733	3.26863	x	AFUN000756	9529.85	-0.489099	0.534058	-0.915816	0.359763	0.443983	0.888394	0.0513945		AFUN000756	10262.4	-0.10925	0.177985	-0.613818	0.539336	0.268141	1	0
AFUN000757	16432950	16434147	1198	others	No	cDNA	mRpL45	others	39S ribosomal protein L45, mitochondrial	mRpL45	No	AFUN000757	233.861	0.765357	0.224657	3.40678	0.00065735	3.1822	0.00260309	2.58451	x	AFUN000757	179.796	0.578951	0.706497	0.819467	0.41252	0.384555	0.917446	0.0374196		AFUN000757	223.798	0.0408178	0.274562	0.148665	0.881818	0.0546212	1	0
AFUN000761	16390746	16392270	1525	others	No	cDNA	AFUN000761	others	tRNA pseudouridine38-40 synthase [Source:Projected from Anopheles gambiae (AGAP002409) VB Community Annotation]	NA	No	AFUN000761	264.123	0.62357	0.182338	3.41987	0.000626515	3.20307	0.00249882	2.60227	x	AFUN000761	183.576	0.576548	0.69164	0.833595	0.404509	0.393071	0.913996	0.0390557		AFUN000761	249.293	0.159689	0.216797	0.736583	0.461376	0.335945	1	0
AFUN000763	16388558	16389199	642	others	No	cDNA	mRpS18A	others	28S ribosomal protein S18A, mitochondrial	mRpS18A	No	AFUN000763	102.159	0.565115	0.178057	3.17379	0.00150465	2.82256	0.00533885	2.27255	x	AFUN000763	72.8315	0.300554	0.890983	0.337328	0.73587	0.133199	0.984947	0.00658717		AFUN000763	94.8265	0.19915	0.242023	0.822855	0.41059	0.386591	1	0
AFUN000764	16386443	16387390	948	others	No	cDNA	AFUN000764	others	unspecified product	NA	No	AFUN000764	114.587	0.132969	0.239313	0.555627	0.578466	0.237722	0.683987	0.164952		AFUN000764	93.1545	0.305611	0.832248	0.367212	0.713461	0.14663	0.983533	0.00721112		AFUN000764	108.137	-0.124032	0.310031	-0.400064	0.689109	0.161712	1	0
AFUN000765	16374694	16375631	938	others	No	cDNA	AFUN000765	others	copper homeostasis protein [Source:Projected from Anopheles gambiae (AGAP002402) VB Community Annotation]	NA	No	AFUN000765	33.2203	0.98418	0.300559	3.2745	0.0010585	2.97531	0.00393178	2.40541	x	AFUN000765	26.6867	1.25944	1.3472	0.934858	0.349861	0.456104	0.884113	0.0534923		AFUN000765	33.4991	-0.0721116	0.436801	-0.16509	0.868873	0.0610437	1	0
AFUN000766	16370241	16374604	4364	others	No	cDNA	AFUN000766	others	V-type H+-transporting ATPase subunit E [Source:Projected from Anopheles gambiae (AGAP002401) VB Community Annotation]	NA	No	AFUN000766	7903.34	-0.570972	0.154958	-3.6847	0.000228976	3.64021	0.00103927	2.98327	x	AFUN000766	6971.38	-0.584034	0.545964	-1.06973	0.284741	0.54555	0.854042	0.0685207		AFUN000766	6841.53	-0.190582	0.182317	-1.04533	0.295869	0.5289	1	0
AFUN000767	16368395	16369947	1553	others	No	cDNA	mRpL37	others	39S ribosomal protein L37, mitochondrial [Source:UniProtKB/TrEMBL;Acc:A0A182R3M6]	mRpL37	No	AFUN000767	227.235	0.310837	0.233524	1.33107	0.183166	0.737155	0.29091	0.536242		AFUN000767	185.244	-0.0313445	0.73718	-0.0425195	0.966085	0.0149849	0.996107	0.0016942		AFUN000767	207.75	0.0160575	0.307272	0.0522582	0.958323	0.0184881	1	0
AFUN000768	16366150	16368293	2144	others	No	cDNA	AFUN000768	others	unspecified product	NA	No	AFUN000768	92.0899	-0.876102	0.320682	-2.732	0.00629519	2.20099	0.0182438	1.73889	x	AFUN000768	74.0369	-1.41455	1.02219	-1.38384	0.166408	0.778826	0.738431	0.13169		AFUN000768	71.6656	0.203685	0.515513	0.395112	0.69276	0.159417	1	0
AFUN000770	16339942	16341999	2058	others	No	cDNA	AFUN000770	others	unspecified product	NA	No	AFUN000770	5.25556	-2.27782	1.04796	-2.17357	0.0297375	1.5267	0.0671277	1.1731		AFUN000770	4.24826	-3.43745	3.17232	-1.08358	0.278552	0.555093	0.848334	0.0714331		AFUN000770	3.24917	0.767164	1.72438	0.444892	0.656398	0.182833	1	0
AFUN000772	16315944	16316992	1049	others	No	cDNA	RpL10-2	others	60S ribosomal protein L10	RpL10-2	No	AFUN000772	3840.56	0.974175	0.204009	4.77515	1.79575e-06	5.74575	1.38151e-05	4.85965	x	AFUN000772	3195.09	0.928803	0.543319	1.7095	0.0873585	1.0587	0.584347	0.23333		AFUN000772	3815.9	-0.102469	0.235018	-0.436003	0.662834	0.178595	1	0
AFUN000774	16312962	16314176	1215	others	No	cDNA	AFUN000774	others	solute carrier family 35 (GDP-fucose transporter), member C1 [Source:Projected from Anopheles gambiae (AGAP002393) VB Community Annotation]	NA	No	AFUN000774	89.8543	0.332861	0.232843	1.42955	0.152845	0.815748	0.252134	0.598368		AFUN000774	74.836	0.24196	0.883465	0.273876	0.78418	0.105584	0.985365	0.00640266		AFUN000774	84.5791	-0.0788952	0.293908	-0.268435	0.788365	0.103273	1	0
AFUN000775	16300433	16311137	10705	others	No	cDNA	AFUN000775	others	Carboxylic ester hydrolase [Source:UniProtKB/TrEMBL;Acc:A0A182R3N4]	NA	No	AFUN000775	42.3649	0.0344705	0.324256	0.106306	0.915339	0.0384179	0.944802	0.0246592		AFUN000775	30.6566	-0.615814	1.20335	-0.511749	0.608827	0.215506	0.969848	0.0132962		AFUN000775	36.2334	0.350953	0.414533	0.846622	0.397206	0.400985	1	0
AFUN000776	16296904	16299713	2810	others	No	cDNA	AFUN000776	others	RRM domain-containing protein [Source:UniProtKB/TrEMBL;Acc:A0A182R3N5]	NA	No	AFUN000776	728.728	0.341579	0.133297	2.56253	0.0103911	1.98334	0.028003	1.5528	x	AFUN000776	612.654	0.382414	0.593122	0.644747	0.519091	0.284756	0.94888	0.0227887		AFUN000776	695.158	-0.141259	0.175126	-0.806614	0.419889	0.376866	1	0
AFUN000777	16293977	16296524	2548	others	No	cDNA	AFUN000777	others	Endonuclease III homolog [Source:UniProtKB/TrEMBL;Acc:A0A182R3N6]	NA	No	AFUN000777	179.76	0.118485	0.281998	0.420162	0.674367	0.171104	0.766152	0.115685		AFUN000777	129.181	0.346052	0.753269	0.4594	0.645947	0.189803	0.974587	0.0111794		AFUN000777	167.559	0.0348233	0.330756	0.105284	0.91615	0.0380333	1	0
AFUN000778	16294671	16295325	655	others	No	cDNA	AFUN000778	others	ubiquitin-like 4A [Source:Projected from Anopheles gambiae (AGAP002389) VB Community Annotation]	NA	No	AFUN000778	80.4555	0.518474	0.345786	1.49941	0.133768	0.873649	0.227637	0.642757		AFUN000778	74.0501	0.448246	0.951849	0.470921	0.637697	0.195386	0.972766	0.0119916		AFUN000778	78.3074	-0.231704	0.462141	-0.50137	0.616111	0.210341	1	0
AFUN000779	16291793	16293987	2195	others	No	cDNA	AFUN000779	others	acid phosphatase [Source:Projected from Anopheles gambiae (AGAP002387) VB Community Annotation]	NA	No	AFUN000779	523.629	1.36166	0.214548	6.34665	2.20059e-10	9.65746	3.41265e-09	8.46691	x	AFUN000779	354.924	1.10703	0.622469	1.77845	0.0753292	1.12304	0.547026	0.261992		AFUN000779	508.503	0.22872	0.252933	0.904272	0.365851	0.436696	1	0
AFUN000780	16286883	16291518	4636	others	No	cDNA	AFUN000780	others	DnaJ homolog subfamily C member [Source:Projected from Anopheles gambiae (AGAP002386) VB Community Annotation]	NA	No	AFUN000780	1285.78	0.150016	0.15602	0.961518	0.336292	0.473283	0.461387	0.335934		AFUN000780	961.397	0.173893	0.646643	0.268916	0.787994	0.103477	0.985365	0.00640266		AFUN000780	1186.96	0.0334497	0.288472	0.115955	0.907688	0.0420632	1	0
AFUN000782	16282323	16284565	2243	others	No	cDNA	AFUN000782	others	unspecified product	NA	No	AFUN000782	291.643	-1.62691	0.484417	-3.3585	NA	#VALUE!	1	0		AFUN000782	137.278	-0.316041	0.747091	-0.423028	0.672275	0.172453	0.982031	0.00787499		AFUN000782	250.675	0.0623046	0.478552	0.130194	0.896413	0.0474919	1	0
AFUN000783	16281496	16282310	815	others	No	cDNA	AFUN000783	others	40S ribosomal protein S30 [Source:UniProtKB/TrEMBL;Acc:A0A182R3P2]	NA	No	AFUN000783	441.839	-0.317261	0.202223	-1.56887	0.116679	0.933007	0.204052	0.690259		AFUN000783	365.476	-0.624449	0.619593	-1.00784	0.313532	0.503718	0.868016	0.0614724		AFUN000783	379.496	0.0240122	0.221865	0.108229	0.913814	0.039142	1	0
AFUN000784	16275946	16279110	3165	others	No	cDNA	AFUN000784	others	RUN domain-containing protein [Source:UniProtKB/TrEMBL;Acc:A0A182R3P3]	NA	No	AFUN000784	164.179	-0.608419	0.216866	-2.80551	0.0050237	2.29898	0.0151221	1.82039	x	AFUN000784	134.801	-0.636541	0.752928	-0.84542	0.397876	0.400252	0.91124	0.0403671		AFUN000784	140.799	-0.0717248	0.284489	-0.252118	0.80095	0.0963948	1	0
AFUN000785	16274774	16275697	924	others	No	cDNA	AFUN000785	others	low molecular weight phosphotyrosine protein phosphatase [Source:Projected from Anopheles gambiae (AGAP004079) VB Community Annotation]	NA	No	AFUN000785	77.06	-0.458835	0.266608	-1.72101	0.0852495	1.06931	0.15856	0.799806		AFUN000785	62.827	-0.8169	0.922753	-0.885285	0.376003	0.424809	0.897125	0.0471472		AFUN000785	64.6335	0.0669233	0.325338	0.205704	0.837022	0.077263	1	0
AFUN000786	16264352	16274376	10025	others	No	cDNA	AFUN000786	others	DNA topoisomerase I [Source:Projected from Anopheles gambiae (AGAP004078) VB Community Annotation]	NA	No	AFUN000786	3683.52	-0.820027	0.139201	-5.89097	3.83929e-09	8.41575	4.89519e-08	7.31023	x	AFUN000786	2614.36	-0.961129	0.560187	-1.71573	0.0862116	1.06443	0.582908	0.2344		AFUN000786	3035.35	0.184563	0.193087	0.955854	0.339146	0.469613	1	0
AFUN000787	16261572	16263570	1999	others	No	cDNA	AFUN000787	others	unspecified product	NA	No	AFUN000787	8.20226	-0.373533	0.851943	-0.438449	0.661061	0.179758	0.755473	0.121781		AFUN000787	2.55998	-1.37457	3.57112	-0.384913	0.700302	0.154714	1	0		AFUN000787	6.61443	1.75709	1.28204	1.37054	0.170518	0.76823	1	0
AFUN000788	16245748	16246389	642	others	No	cDNA	AFUN000788	others	unspecified product	NA	No	AFUN000788	12.3926	-0.735026	0.654897	-1.12235	0.261712	0.582177	0.382352	0.417537		AFUN000788	6.66163	-4.14915	2.65538	-1.56254	0.11816	0.927531	0.66057	0.180081		AFUN000788	8.2448	2.85017	1.32009	2.15907	0.0308444	1.51082	1	0
AFUN000789	16218140	16245663	27524	others	No	cDNA	AFUN000789	others	fimbrin [Source:Projected from Anopheles gambiae (AGAP004071) VB Community Annotation]	NA	No	AFUN000789	3034.38	-0.0180505	0.233836	-0.077193	0.93847	0.0275796	0.959982	0.017737		AFUN000789	2509.8	-0.178664	0.595049	-0.30025	0.763986	0.116914	0.985365	0.00640266		AFUN000789	2737.74	-0.047306	0.307168	-0.154007	0.877604	0.0567013	1	0
AFUN000790	16215446	16217761	2316	others	No	cDNA	Thoc1	others	THO complex subunit 1	Thoc1	No	AFUN000790	192.233	-0.417544	0.233036	-1.79175	0.0731723	1.13565	0.14052	0.852261		AFUN000790	115.472	-0.356888	0.780129	-0.457473	0.647331	0.188873	0.975565	0.0107438		AFUN000790	166.715	0.326589	0.272623	1.19795	0.230935	0.636511	1	0
AFUN000791	16212930	16214966	2037	others	No	cDNA	AFUN000791	others	Dipeptidase [Source:UniProtKB/TrEMBL;Acc:A0A182R3Q0]	NA	No	AFUN000791	97.3356	-0.691558	0.314294	-2.20036	0.0277816	1.55624	0.0634988	1.19723		AFUN000791	70.4969	-0.56723	0.917444	-0.618272	0.536396	0.270515	0.953978	0.0204615		AFUN000791	83.6721	0.0466733	0.413343	0.112917	0.910097	0.0409125	1	0
AFUN000792	16199270	16212535	13266	others	No	cDNA	AFUN000792	others	unspecified product	NA	No	AFUN000792	325.372	0.150439	0.12535	1.20015	0.230081	0.638119	0.346533	0.460255		AFUN000792	207.07	-0.0205862	0.690351	-0.0298198	0.976211	0.0104564	0.997353	0.00115096		AFUN000792	291.067	0.318166	0.181873	1.74938	0.0802253	1.09569	1	0
AFUN000794	16184063	16185355	1293	others	No	cDNA	Med13	others	mediator of RNA polymerase II transcription subunit 13	Med13	No	AFUN000794	8.12776	0.584757	0.892769	0.654993	0.512473	0.290329	0.628308	0.201827		AFUN000794	3.84157	-0.282438	2.95636	-0.0955356	0.923889	0.03438	0.992781	0.00314639		AFUN000794	7.00414	0.998573	1.1529	0.86614	0.386413	0.412948	1	0
AFUN000799	16054957	16055712	756	others	No	cDNA	AFUN000799	others	unspecified product	NA	No	AFUN000799	23.3121	-0.538714	0.407331	-1.32255	0.185986	0.730519	0.294544	0.53085		AFUN000799	24.6232	0.259364	1.31563	0.197141	0.843718	0.0738029	0.985497	0.0063449		AFUN000799	22.7408	-0.723026	0.504191	-1.43403	0.151563	0.819408	1	0
AFUN000800	16051649	16054697	3049	others	No	cDNA	AFUN000800	others	hemomucin [Source:Projected from Anopheles gambiae (AGAP004065) VB Community Annotation]	NA	No	AFUN000800	1748.85	-0.427785	0.162677	-2.62966	0.00854713	2.06818	0.0236529	1.62612	x	AFUN000800	1320.21	-0.0109239	0.568963	-0.0191997	0.984682	0.0067041	0.998705	0.000562645		AFUN000800	1590.05	-0.12612	0.185885	-0.678483	0.497465	0.303237	1	0
AFUN000801	16049529	16051272	1744	others	No	cDNA	AFUN000801	others	RNA-binding protein NOB1 [Source:UniProtKB/TrEMBL;Acc:A0A182R3R0]	NA	No	AFUN000801	664.907	-0.943399	0.134377	-7.02053	2.21031e-12	11.6555	4.67831e-11	10.3299	x	AFUN000801	466.668	-1.14129	0.600166	-1.90162	0.0572208	1.24245	0.471309	0.326694		AFUN000801	537.561	0.235905	0.172672	1.3662	0.171876	0.764785	1	0
AFUN000802	16047672	16049064	1393	others	No	cDNA	Med4	others	Mediator of RNA polymerase II transcription subunit 4 [Source:UniProtKB/TrEMBL;Acc:A0A182R3R1]	Med4	No	AFUN000802	153.978	1.05151	0.195782	5.3708	7.83881e-08	7.10575	8.01015e-07	6.09636	x	AFUN000802	122.065	0.914576	0.762206	1.19991	0.230176	0.63794	0.805375	0.0940018		AFUN000802	151.606	-0.014213	0.225153	-0.063126	0.949666	0.022429	1	0
AFUN000803	16042677	16047485	4809	others	No	cDNA	AFUN000803	others	DDB1- and CUL4-associated factor [Source:Projected from Anopheles gambiae (AGAP004062) VB Community Annotation]	NA	No	AFUN000803	738.46	-0.508882	0.42559	-1.19571	0.23181	0.634867	0.348685	0.457566		AFUN000803	359.392	0.62439	0.646743	0.965437	0.334326	0.47583	0.880753	0.0551459		AFUN000803	671.075	0.290493	0.383959	0.756573	0.449306	0.347458	1	0
AFUN000804	16038973	16042588	3616	others	No	cDNA	AFUN000804	others	unspecified product	NA	No	AFUN000804	246.914	0.184538	0.305565	0.603922	0.545895	0.262891	0.656422	0.182817		AFUN000804	203.042	-0.553038	0.676573	-0.81741	0.413694	0.383321	0.917496	0.0373957		AFUN000804	213.74	0.172169	0.288297	0.597192	0.550379	0.259338	1	0
AFUN000805	16036502	16038856	2355	others	No	cDNA	AFUN000805	others	unspecified product	NA	No	AFUN000805	212.535	-0.0292976	0.227678	-0.12868	0.897611	0.0469118	0.933592	0.0298429		AFUN000805	157.863	0.128398	0.741181	0.173235	0.862467	0.0642576	0.987478	0.00547265		AFUN000805	195.374	0.00797327	0.300611	0.0265236	0.97884	0.00928841	1	0
AFUN000806	15986296	16036282	49987	others	No	cDNA	AFUN000806	others	Ca-activated cl channel protein [Source:Projected from Anopheles gambiae (AGAP004059) VB Community Annotation]	NA	No	AFUN000806	1077.38	0.171165	0.119855	1.4281	0.153262	0.814565	0.25267	0.597447		AFUN000806	811.722	0.0806112	0.577937	0.139481	0.88907	0.0510639	0.990097	0.00432229		AFUN000806	987.471	0.0575643	0.159668	0.360525	0.718455	0.143601	1	0
AFUN000810	68427540	68428634	1095	others	No	cDNA	AFUN000810	others	CCHC-type domain-containing protein [Source:UniProtKB/TrEMBL;Acc:A0A182R3R9]	NA	No	AFUN000810	60.0854	1.88176	0.293053	6.42122	1.35185e-10	9.86907	2.15401e-09	8.66675	x	AFUN000810	82.6862	2.93181	0.961173	3.05025	0.00228653	2.64082	0.0475356	1.32298	x	AFUN000810	75.1341	-0.918206	0.390534	-2.35115	0.0187153	1.7278	1	0
AFUN000811	16154207	16154866	660	others	No	cDNA	AFUN000811	others	unspecified product	NA	No	AFUN000811	1.3617	0.583675	1.85929	0.313924	0.753579	0.122871	0.827152	0.0824149		AFUN000811	0	NA	NA	NA	NA	#VALUE!	1	0		AFUN000811	1.11842	2.45023	2.60547	0.940419	0.347003	0.459667	1	0
AFUN000812	16154961	16155506	546	others	No	cDNA	AFUN000812	others	THAP-type domain-containing protein [Source:UniProtKB/TrEMBL;Acc:A0A182R3S1]	NA	No	AFUN000812	0	NA	NA	NA	NA	#VALUE!	1	0		AFUN000812	0	NA	NA	NA	NA	#VALUE!	1	0		AFUN000812	0	NA	NA	NA	NA	#VALUE!	1	0
AFUN000816	79144874	79152868	7995	others	No	cDNA	AFUN000816	others	wingless-type MMTV integration site family, member [Source:Projected from Anopheles gambiae (AGAP009735) VB Community Annotation]	NA	No	AFUN000816	15.9329	-0.975711	0.397212	-2.4564	0.0140337	1.85283	0.0360025	1.44367	x	AFUN000816	14.8087	-0.657772	1.62312	-0.405252	0.685292	0.164124	0.982577	0.00763328		AFUN000816	13.7051	-0.406879	0.545691	-0.745622	0.455896	0.341134	1	0
AFUN000817	79107726	79141720	33995	others	No	cDNA	AFUN000817	others	Anion exchange protein [Source:UniProtKB/TrEMBL;Acc:A0A182R3S6]	NA	No	AFUN000817	1549.13	0.419383	0.148991	2.81482	0.00488044	2.31154	0.0147395	1.83152	x	AFUN000817	1117.14	0.222605	0.599057	0.371592	0.710196	0.148622	0.983345	0.00729415		AFUN000817	1430.22	0.14927	0.231799	0.643965	0.519598	0.284332	1	0
AFUN000818	79103842	79106864	3023	others	No	cDNA	AFUN000818	others	Elongation factor G, mitochondrial [Source:UniProtKB/TrEMBL;Acc:A0A182R3S7]	NA	No	AFUN000818	782.396	-0.568803	0.189074	-3.00837	0.00262657	2.58061	0.00868021	2.06147	x	AFUN000818	619.135	-0.868881	0.604053	-1.43842	0.150315	0.822997	0.710139	0.148657		AFUN000818	651.995	0.0932706	0.238994	0.390264	0.696342	0.157178	1	0
AFUN000819	79102501	79103522	1022	others	No	cDNA	GRX3	others	glutaredoxin	GRX3	No	AFUN000819	284.365	0.0778246	0.206125	0.377561	0.705757	0.151345	0.79104	0.101802		AFUN000819	256.09	0.103315	0.649548	0.159057	0.873624	0.0586753	0.988242	0.00513689		AFUN000819	266.634	-0.234035	0.234194	-0.999324	0.317638	0.498068	1	0
AFUN000820	79100144	79102496	2353	others	No	cDNA	AFUN000820	others	vacuolar protein sorting [Source:Projected from Anopheles gambiae (AGAP009739) VB Community Annotation]	NA	No	AFUN000820	188.551	-0.758905	0.171022	-4.43748	9.10171e-06	5.04088	5.95718e-05	4.22496	x	AFUN000820	160.099	-0.863054	0.710952	-1.21394	0.22477	0.648261	0.796907	0.0985926		AFUN000820	157.435	-0.0950413	0.206317	-0.460656	0.645045	0.19041	1	0
AFUN000821	79096174	79099235	3062	others	No	cDNA	AFUN000821	others	tRNA (guanine26-N2/guanine27-N2)-dimethyltransferase [Source:Projected from Anopheles gambiae (AGAP009740) VB Community Annotation]	NA	No	AFUN000821	472.157	-0.180083	0.128848	-1.39764	0.16222	0.789896	0.264184	0.578093		AFUN000821	342.043	0.0719507	0.625577	0.115015	0.908433	0.041707	0.991504	0.00370554		AFUN000821	430.695	-0.00331872	0.137477	-0.0241402	0.980741	0.00844577	1	0
AFUN000822	79090699	79096194	5496	others	No	cDNA	AFUN000822	others	splicing factor, arginine/serine-rich [Source:Projected from Anopheles gambiae (AGAP009742) VB Community Annotation]	NA	No	AFUN000822	3010.95	-0.582278	0.288843	-2.01589	0.0438111	1.35842	0.0923469	1.03458		AFUN000822	2204.12	-0.618937	0.546681	-1.13217	0.257562	0.589119	0.827494	0.0822351		AFUN000822	2573.66	0.0882631	0.336497	0.2623	0.79309	0.100677	1	0
AFUN000823	79084207	79090143	5937	others	No	cDNA	AFUN000823	others	ribonuclease Z [Source:Projected from Anopheles gambiae (AGAP009743) VB Community Annotation]	NA	No	AFUN000823	756.99	0.42049	0.138293	3.04058	0.00236125	2.62686	0.00791197	2.10172	x	AFUN000823	630.379	0.642928	0.674801	0.952767	0.340708	0.467618	0.881522	0.054767		AFUN000823	736.518	-0.172753	0.294079	-0.587437	0.55691	0.254215	1	0
AFUN000824	79055871	79084145	28275	others	No	cDNA	AFUN000824	others	unspecified product	NA	No	AFUN000824	397.576	-0.4028	0.324128	-1.24272	0.213972	0.669643	0.327763	0.48444		AFUN000824	300.032	-0.426545	0.710664	-0.600206	0.548369	0.260927	0.95534	0.0198421		AFUN000824	347.316	0.0400344	0.431419	0.092797	0.926065	0.0333586	1	0
AFUN000825	79030790	79048445	17656	others	No	cDNA	AFUN000825	others	Sugar transporter ERD6-like [Source:Projected from Anopheles gambiae (AGAP009745) VB Community Annotation]	NA	No	AFUN000825	532.783	0.653666	0.314007	2.08169	0.0373707	1.42747	0.0808685	1.09222		AFUN000825	532.473	0.76149	0.719484	1.05838	0.289881	0.537781	0.855744	0.0676561		AFUN000825	540.229	-0.402707	0.439309	-0.916684	0.359308	0.444533	1	0
AFUN000826	79028142	79030163	2022	others	No	cDNA	AFUN000826	others	RuvB-like helicase [Source:UniProtKB/TrEMBL;Acc:A0A182R3T5]	NA	No	AFUN000826	436.583	-0.592772	0.12041	-4.92295	8.525e-07	6.06931	7.10677e-06	5.14833	x	AFUN000826	311.937	-0.924792	0.660663	-1.39979	0.161575	0.791625	0.733177	0.134791		AFUN000826	361.075	0.250161	0.209191	1.19585	0.231754	0.634972	1	0
AFUN000827	79025614	79028092	2479	others	No	cDNA	AFUN000827	others	gamma-interferon-inducible lysosomal thiol reductase precursor [Source:Projected from Anopheles gambiae (AGAP009747) VB Community Annotation]	NA	No	AFUN000827	1261.77	0.774474	0.188751	4.10316	4.07545e-05	4.38982	0.00022714	3.64371	x	AFUN000827	781.309	0.729952	0.575785	1.26775	0.204887	0.688485	0.778196	0.108911		AFUN000827	1184.67	0.323434	0.205772	1.57181	0.115995	0.935562	1	0
AFUN000831	78801299	78804980	3682	others	No	cDNA	AFUN000831	others	unspecified product	NA	No	AFUN000831	25.1741	1.28147	0.393081	3.26008	0.00111382	2.95318	0.0041074	2.38643	x	AFUN000831	25.8658	1.61097	1.35758	1.18665	0.235367	0.628255	0.81102	0.0909685		AFUN000831	27.2974	-0.442766	0.491514	-0.900821	0.367683	0.434526	1	0
AFUN000833	78786489	78789041	2553	CPs	Yes	cDNA	AFUN000833	others	cuticular protein CPLCP11 [Source:Projected from Anopheles gambiae (AGAP009758) VB Community Annotation]	NA	No	AFUN000833	29.0995	0.0708358	0.456733	0.155092	0.876748	0.057125	0.918445	0.0369467		AFUN000833	42.8553	0.462529	1.28084	0.361113	0.718015	0.143866	0.984947	0.00658717		AFUN000833	31.0679	-1.03685	0.680127	-1.5245	0.127384	0.894885	1	0
AFUN000834	78764755	78767383	2629	CPs	Yes	cDNA	AFUN000834	others	cuticular protein CPLCP12 [Source:Projected from Anopheles gambiae (AGAP009759) VB Community Annotation]	NA	No	AFUN000834	96.4734	-0.28429	0.644218	-0.441294	0.659	0.181115	0.753792	0.122748		AFUN000834	236.246	0.605897	2.57128	0.23564	0.813712	0.0895292	0.985365	0.00640266		AFUN000834	121.725	-1.94552	0.871086	-2.23344	0.0255199	1.59312	1	0
AFUN000835	78747879	78810766	62888	others	No	cDNA	AFUN000835	others	angiotensin-converting enzyme [Source:Projected from Anopheles gambiae (AGAP009757) VB Community Annotation]	NA	No	AFUN000835	83.0166	-1.12381	0.331747	-3.38755	0.000705202	3.15169	0.00276768	2.55788	x	AFUN000835	63.5856	-0.17041	0.924563	-0.184314	0.853767	0.0686607	0.987051	0.0056603		AFUN000835	74.4265	-0.415127	0.37586	-1.10447	0.269388	0.569622	1	0
AFUN000837	78726221	78730478	4258	others	No	cDNA	AFUN000837	others	unspecified product	NA	No	AFUN000837	28.5215	0.269853	0.38144	0.70746	0.479281	0.31941	0.598773	0.222738		AFUN000837	19.1362	-0.213583	1.46726	-0.145566	0.884264	0.053418	0.990097	0.00432229		AFUN000837	25.2344	0.37761	0.507146	0.744577	0.456527	0.340533	1	0
AFUN000838	78719996	78723189	3194	others	No	cDNA	AFUN000838	others	dymeclin [Source:Projected from Anopheles gambiae (AGAP009765) VB Community Annotation]	NA	No	AFUN000838	106.23	0.116079	0.225649	0.514423	0.606956	0.216843	0.708162	0.149868		AFUN000838	75.1254	0.411803	0.871844	0.472335	0.636687	0.196074	0.972766	0.0119916		AFUN000838	99.3244	0.039988	0.25989	0.153865	0.877716	0.0566459	1	0
AFUN000839	78717385	78718823	1439	others	No	cDNA	AFUN000839	others	unspecified product	NA	No	AFUN000839	9.53824	2.09466	1.01394	2.06587	0.0388411	1.41071	0.0835545	1.07803		AFUN000839	8.00154	1.85675	2.21135	0.839645	0.401107	0.396739	0.912653	0.0396943		AFUN000839	9.99317	-0.0910937	1.10171	-0.0826843	0.934103	0.0296054	1	0
AFUN000840	13576437	13577016	580	others	No	cDNA	AFUN000840	others	unspecified product	NA	No	AFUN000840	31.1887	0.892868	0.375041	2.38072	0.0172789	1.76248	0.0427799	1.36876	x	AFUN000840	18.9922	0.366	1.45896	0.250864	0.801919	0.0958693	0.985365	0.00640266		AFUN000840	28.5795	0.461386	0.463347	0.995767	0.319363	0.495715	1	0
AFUN000841	13577014	13580274	3261	others	No	cDNA	AFUN000841	others	26S proteasome non-ATPase regulatory subunit 2 [Source:UniProtKB/TrEMBL;Acc:A0A182R3V0]	NA	No	AFUN000841	825.372	1.59372	0.174234	9.14697	5.85531e-20	19.2325	3.24919e-18	17.4882	x	AFUN000841	605.844	1.5237	0.597515	2.55006	0.0107703	1.96777	0.155798	0.807439		AFUN000841	829.085	0.0775056	0.219071	0.353793	0.723494	0.140565	1	0
AFUN000842	13580822	13586805	5984	others	No	cDNA	AFUN000842	others	lysophosphatidylglycerol acyltransferase [Source:Projected from Anopheles gambiae (AGAP002482) VB Community Annotation]	NA	No	AFUN000842	1640.01	-0.112643	0.246547	-0.45688	0.647757	0.188588	0.744067	0.128388		AFUN000842	1227.24	-0.318102	0.569731	-0.558337	0.576614	0.239115	0.963704	0.0160563		AFUN000842	1447.26	0.116224	0.297018	0.391302	0.695574	0.157657	1	0
AFUN000843	13586833	13590095	3263	others	No	cDNA	AFUN000843	others	ketohexokinase [Source:Projected from Anopheles gambiae (AGAP002483) VB Community Annotation]	NA	No	AFUN000843	130.847	0.665403	0.197548	3.36831	0.000756305	3.1213	0.00294111	2.53149	x	AFUN000843	98.8878	0.275922	0.832756	0.331336	0.740391	0.130539	0.984947	0.00658717		AFUN000843	121.965	0.111547	0.265496	0.420145	0.674379	0.171096	1	0
AFUN000846	13605788	13607997	2210	others	No	cDNA	AFUN000846	others	unspecified product	NA	No	AFUN000846	26.3997	-2.41541	0.881662	-2.73961	0.00615127	2.21104	0.0178998	1.74715	x	AFUN000846	35.5273	-5.21136	1.33171	-3.91328	9.10525e-05	4.04071	0.00298744	2.5247	x	AFUN000846	10.2612	1.62181	1.15962	1.39857	0.161942	0.790641	1	0
AFUN000847	13611764	13623024	11261	others	No	cDNA	AFUN000847	others	unspecified product	NA	No	AFUN000847	2.37118	-4.59455	1.4274	-3.21883	0.00128717	2.89036	0.00466443	2.3312	x	AFUN000847	3.62542	-0.0234991	3.44573	-0.00681978	0.994559	0.0023696	0.999499	0.000217778		AFUN000847	2.37702	-4.03459	2.14735	-1.87887	0.0602629	1.21995	1	0
AFUN000856	68540937	68542036	1100	others	No	cDNA	AFUN000856	others	unspecified product	NA	No	AFUN000856	551.878	0.71425	0.292942	2.4382	0.0147608	1.83089	0.0375957	1.42486	x	AFUN000856	407.386	1.1514	0.62256	1.84947	0.0643904	1.19118	0.504556	0.297091		AFUN000856	544.636	-0.0294909	0.329268	-0.0895648	0.928633	0.0321559	1	0
AFUN000857	68538647	68540875	2229	others	No	cDNA	AFUN000857	others	DNA fragmentation factor-related protein [Source:Projected from Anopheles gambiae (AGAP009681) VB Community Annotation]	NA	No	AFUN000857	63.1364	0.0041043	0.333778	0.0122965	0.990189	0.00428188	0.994005	0.00261131		AFUN000857	70.8355	0.781473	0.910661	0.858139	0.390816	0.408028	0.905607	0.0430602		AFUN000857	65.6824	-0.747651	0.410452	-1.82153	0.0685264	1.16414	1	0
AFUN000858	68536143	68538319	2177	others	No	cDNA	AFUN000858	others	DNA-directed RNA polymerase I subunit RPA49 [Source:Projected from Anopheles gambiae (AGAP001045) VB Community Annotation]	NA	No	AFUN000858	902.129	0.111079	0.190073	0.584403	0.558949	0.252628	0.667653	0.175449		AFUN000858	672.579	0.193948	0.601226	0.322587	0.747008	0.126675	0.984947	0.00658717		AFUN000858	833.938	0.0189758	0.247632	0.0766292	0.938919	0.0273721	1	0
AFUN000860	68403704	68465078	61375	others	No	cDNA	AFUN000860	others	Histone acetyltransferase [Source:UniProtKB/TrEMBL;Acc:A0A182R3W9]	NA	No	AFUN000860	296.032	-0.321315	0.206171	-1.55849	0.119117	0.924025	0.207351	0.683294		AFUN000860	200.166	-0.279174	0.685594	-0.4072	0.683861	0.165032	0.982577	0.00763328		AFUN000860	260.384	0.17649	0.249308	0.70792	0.478995	0.319669	1	0
AFUN000861	68400402	68403442	3041	others	No	cDNA	AFUN000861	others	sphingosine-1-phosphate phosphatase [Source:Projected from Anopheles gambiae (AGAP009675) VB Community Annotation]	NA	No	AFUN000861	376.41	0.546603	0.138525	3.94587	7.95092e-05	4.09958	0.00040869	3.38861	x	AFUN000861	332.295	1.04982	0.637894	1.64577	0.0998119	1.00082	0.612869	0.212632		AFUN000861	381.1	-0.315778	0.175692	-1.79734	0.072282	1.14097	1	0
AFUN000865	68328221	68329134	914	others	No	cDNA	AFUN000865	others	COMM domain-containing protein [Source:UniProtKB/TrEMBL;Acc:A0A182R3X4]	NA	No	AFUN000865	49.1982	-0.235957	0.401149	-0.588203	0.556396	0.254616	0.665039	0.177153		AFUN000865	27.7911	0.307338	1.28274	0.239594	0.810645	0.0911693	0.985365	0.00640266		AFUN000865	44.5905	0.298235	0.478495	0.623277	0.533103	0.273189	1	0
AFUN000866	68315947	68328018	12072	IMPs	Yes	cDNA	SRPN4	others	serine protease inhibitor (serpin) 4	SRPN4	No	AFUN000866	2364.7	-0.18389	0.227906	-0.806867	0.419743	0.377017	0.544484	0.264015		AFUN000866	1822.21	0.0250765	0.556775	0.0450388	0.964076	0.0158886	0.996107	0.0016942		AFUN000866	2161.75	-0.073475	0.270462	-0.271665	0.785879	0.104644	1	0
AFUN000869	66204709	66205044	336	others	No	cDNA	AFUN000869	others	unspecified product	NA	No	AFUN000869	0	NA	NA	NA	NA	#VALUE!	1	0		AFUN000869	0	NA	NA	NA	NA	#VALUE!	1	0		AFUN000869	0	NA	NA	NA	NA	#VALUE!	1	0
AFUN000870	66335278	66340112	4835	others	No	cDNA	AFUN000870	others	unspecified product	NA	No	AFUN000870	6.26366	-2.83161	0.89099	-3.17805	0.00148267	2.82896	0.00527258	2.27798	x	AFUN000870	4.73094	-3.61219	3.03718	-1.18933	0.234312	0.630206	0.809256	0.0919142		AFUN000870	3.90392	0.589284	1.61991	0.363775	0.716026	0.145071	1	0
AFUN000871	66350765	66353805	3041	others	No	cDNA	AFUN000871	others	Reverse transcriptase domain-containing protein [Source:UniProtKB/TrEMBL;Acc:A0A182R3Y0]	NA	No	AFUN000871	5.70006	-1.02575	0.844895	-1.21406	0.224724	0.64835	0.340475	0.467915		AFUN000871	6.30254	-1.40494	2.44279	-0.575135	0.5652	0.247798	0.961732	0.0169459		AFUN000871	4.34292	-0.363702	1.1166	-0.325724	0.744633	0.128058	1	0
AFUN000872	66410295	66449343	39049	others	No	cDNA	AFUN000872	others	U3 small nucleolar ribonucleoprotein protein LCP5 [Source:Projected from Anopheles gambiae (AGAP008697) UniProtKB/TrEMBL;Acc:A0A1S4GZQ0]	NA	No	AFUN000872	868.31	-0.413223	0.133335	-3.09912	0.00194094	2.71199	0.00664846	2.17728	x	AFUN000872	652.045	-0.137924	0.581694	-0.237108	0.812573	0.0901375	0.985365	0.00640266		AFUN000872	779.866	-0.0688835	0.145151	-0.474565	0.635097	0.19716	1	0
AFUN000873	66449711	66452399	2689	others	No	cDNA	AFUN000873	others	STIP [Source:Projected from Anopheles gambiae (AGAP028421) UniProtKB/TrEMBL;Acc:A1XDB5]	NA	No	AFUN000873	184.216	-0.824843	0.181494	-4.54475	5.50017e-06	5.25962	3.77007e-05	4.42365	x	AFUN000873	134.936	-0.61894	0.742678	-0.833389	0.404625	0.392947	0.913996	0.0390557		AFUN000873	157.441	-0.0269102	0.228661	-0.117686	0.906316	0.0427202	1	0
AFUN000874	66454151	66455826	1676	others	No	cDNA	AFUN000874	others	YqaJ domain-containing protein [Source:UniProtKB/TrEMBL;Acc:A0A182R3Y3]	NA	No	AFUN000874	87.606	-0.0669693	0.329904	-0.202996	0.839138	0.0761667	0.890712	0.0502629		AFUN000874	58.7098	-0.103445	0.941886	-0.109827	0.912546	0.0397451	0.99189	0.00353644		AFUN000874	78.1891	0.212036	0.39938	0.530912	0.59548	0.225133	1	0
AFUN000875	66456193	66467074	10882	others	No	cDNA	AFUN000875	others	unspecified product	NA	No	AFUN000875	2207.71	1.10827	0.24853	4.45931	8.22228e-06	5.08501	5.44582e-05	4.26394	x	AFUN000875	1414.5	0.672453	0.590032	1.13969	0.254416	0.594456	0.824191	0.0839724		AFUN000875	2074.74	0.357332	0.316075	1.13053	0.258254	0.587954	1	0
AFUN000876	66470281	66476686	6406	others	No	cDNA	AFUN000876	others	Anti_prolifrtn domain-containing protein [Source:UniProtKB/TrEMBL;Acc:A0A182R3Y5]	NA	No	AFUN000876	9580.15	0.16187	0.147915	1.09434	0.273805	0.562559	0.395851	0.402468		AFUN000876	6763.58	0.0211455	0.541486	0.0390509	0.96885	0.0137436	0.996476	0.0015331		AFUN000876	8680.48	0.169895	0.184373	0.921475	0.356803	0.447572	1	0
AFUN000877	66522549	66524529	1981	OPs	Yes	cDNA	Or65	others	odorant receptor	Or65	No	AFUN000877	11.4043	0.32054	0.509113	0.629604	0.528954	0.276582	0.642038	0.192439		AFUN000877	11.2636	1.49761	1.86852	0.801496	0.422844	0.373819	0.922023	0.0352582		AFUN000877	12.1653	-0.596741	0.579251	-1.03019	0.30292	0.518673	1	0
AFUN000878	66560721	66561592	872	others	No	cDNA	AFUN000878	others	unspecified product	NA	No	AFUN000878	3.62349	0.374551	1.22761	0.305106	0.760286	0.119023	0.831539	0.0801171		AFUN000878	5.31523	0.781797	2.61418	0.29906	0.764894	0.116398	0.985365	0.00640266		AFUN000878	4.00319	-1.04447	1.37484	-0.759704	0.447432	0.349273	1	0
AFUN000879	66467438	66571958	104521	others	No	cDNA	AFUN000879	others	Inositol-pentakisphosphate 2-kinase [Source:Projected from Anopheles gambiae (AGAP008700) UniProtKB/TrEMBL;Acc:A0A1S4GZ09]	NA	No	AFUN000879	753.891	-0.354279	0.206459	-1.71598	0.0861656	1.06467	0.159845	0.796302		AFUN000879	606.09	-0.641855	0.59569	-1.0775	0.281258	0.550895	0.850362	0.070396		AFUN000879	645.278	0.0545557	0.243344	0.224192	0.822608	0.0848069	1	0
AFUN000884	66712702	66714216	1515	others	No	cDNA	AFUN000884	others	Juvenile hormone-inducible protein [Source:Projected from Anopheles gambiae (AGAP008704) UniProtKB/TrEMBL;Acc:A0A1S4GZS3]	NA	No	AFUN000884	208.952	0.305453	0.156007	1.95794	0.0502366	1.29898	0.103364	0.985629		AFUN000884	177.155	0.537043	0.702664	0.764295	0.444692	0.351941	0.925465	0.03364		AFUN000884	202.242	-0.195378	0.201313	-0.970519	0.331788	0.47914	1	0
AFUN000885	66719888	66753610	33723	others	No	cDNA	AFUN000885	others	unspecified product	NA	No	AFUN000885	614.071	0.57887	0.30424	1.90268	0.0570828	1.2435	0.114461	0.941341		AFUN000885	474.893	0.433567	0.627742	0.690677	0.489768	0.310009	0.941131	0.0263497		AFUN000885	581.645	0.030479	0.372147	0.0819004	0.934726	0.0293157	1	0
AFUN000886	66840426	66844740	4315	others	No	cDNA	AFUN000886	others	Protein zwilch [Source:Projected from Anopheles gambiae (AGAP008706) UniProtKB/TrEMBL;Acc:A0A1S4GZ12]	NA	No	AFUN000886	122.619	0.872229	0.327987	2.65934	0.00782934	2.10627	0.0219617	1.65833	x	AFUN000886	72.1098	-0.044944	0.93812	-0.0479086	0.961789	0.0169202	0.995906	0.00178163		AFUN000886	108.774	0.628094	0.431696	1.45494	0.145685	0.836585	1	0
AFUN000887	66845036	66846066	1031	others	No	cDNA	AFUN000887	others	Maf-like protein yceF [Source:Projected from Anopheles gambiae (AGAP008707) VB Community Annotation]	NA	No	AFUN000887	85.6915	-0.706658	0.246782	-2.86349	0.00419007	2.37778	0.0129675	1.88715	x	AFUN000887	75.1447	0.0349569	0.876029	0.0399038	0.96817	0.0140485	0.996371	0.00157911		AFUN000887	79.5288	-0.464086	0.30025	-1.54566	0.122186	0.912979	1	0
AFUN000896	71121667	71129437	7771	others	No	cDNA	AFUN000896	others	solute carrier family 9 (sodium/hydrogen exchanger), member 6/7 [Source:Projected from Anopheles gambiae (AGAP008718) VB Community Annotation]	NA	No	AFUN000896	644.218	0.0136053	0.192259	0.0707656	0.943584	0.0252193	0.963169	0.0162977		AFUN000896	540.362	0.336739	0.590459	0.570301	0.568473	0.24529	0.961835	0.0168995		AFUN000896	611.95	-0.222007	0.226574	-0.979847	0.327162	0.485237	1	0
AFUN000897	71130354	71131437	1084	others	No	cDNA	AFUN000897	others	S-phase kinase-associated protein [Source:Projected from Anopheles gambiae (AGAP008719) VB Community Annotation]	NA	No	AFUN000897	782.16	-0.718877	0.256724	-2.80019	0.00510719	2.29182	0.0153553	1.81374	x	AFUN000897	677.277	-0.549889	0.578461	-0.950607	0.341804	0.466223	0.881667	0.0546952		AFUN000897	679.217	-0.242881	0.301629	-0.80523	0.420687	0.376041	1	0
AFUN000898	71136301	71137867	1567	others	No	cDNA	AFUN000898	others	unspecified product	NA	No	AFUN000898	18.0258	-0.247655	0.675228	-0.366772	0.713789	0.14643	0.796685	0.0987136		AFUN000898	12.5671	0.578979	1.76789	0.327498	0.743291	0.128841	0.984947	0.00658717		AFUN000898	17.0273	-0.0908266	0.804444	-0.112906	0.910105	0.0409085	1	0
AFUN000899	71139334	71145663	6330	others	No	cDNA	AFUN000899	others	Facilitated trehalose transporter Tret1-2 homolog [Source:Projected from Anopheles gambiae (AGAP008721) UniProtKB/TrEMBL;Acc:A0A1S4GZ27]	NA	No	AFUN000899	473.142	-0.0922634	0.522353	-0.17663	0.859799	0.0656032	0.905937	0.0429022		AFUN000899	385.502	-0.129154	0.626547	-0.206136	0.836685	0.0774382	0.985365	0.00640266		AFUN000899	428.457	-0.0683959	0.607623	-0.112563	0.910377	0.0407787	1	0
AFUN000900	71150599	71155278	4680	others	No	cDNA	AFUN000900	others	unspecified product	NA	No	AFUN000900	4.84771	5.61528	3.44196	1.63142	NA	#VALUE!	1	0		AFUN000900	0	NA	NA	NA	NA	#VALUE!	1	0		AFUN000900	3.97327	4.69659	4.0012	1.17379	NA	#VALUE!	1	0
AFUN000901	71171931	71174404	2474	others	No	cDNA	AFUN000901	others	minichromosome maintenance protein [Source:Projected from Anopheles gambiae (AGAP008723) VB Community Annotation]	NA	No	AFUN000901	118.901	-0.127137	0.351766	-0.361424	0.717783	0.144007	0.799813	0.0970115		AFUN000901	72.9931	-0.156313	0.898544	-0.173962	0.861895	0.0645455	0.987401	0.00550663		AFUN000901	104.984	0.344018	0.430834	0.798493	0.424584	0.372036	1	0
AFUN000903	71179804	71181902	2099	others	No	cDNA	Ift52	others	intraflagellar transport 52	Ift52	No	AFUN000903	15.8581	-0.000829755	0.575876	-0.00144086	0.99885	0.000499569	0.999244	0.000328494		AFUN000903	8.38306	-0.255899	2.07913	-0.12308	0.902044	0.0447722	0.991504	0.00370554		AFUN000903	13.7595	0.638631	0.745802	0.8563	0.391832	0.406901	1	0
AFUN000904	71215809	71256724	40916	others	No	cDNA	AFUN000904	others	eyes absent homolog [Source:Projected from Anopheles gambiae (AGAP008726) VB Community Annotation]	NA	No	AFUN000904	1019	1.07064	0.237665	4.50484	6.64218e-06	5.17769	4.4854e-05	4.3482	x	AFUN000904	673.515	1.14803	0.615064	1.86652	0.0619685	1.20783	0.49415	0.306141		AFUN000904	987.682	0.204447	0.295679	0.69145	0.489283	0.31044	1	0
AFUN000905	71257382	71258810	1429	others	No	cDNA	AFUN000905	others	cytochrome c oxidase subunit 4, mitochondrial precursor [Source:Projected from Anopheles gambiae (AGAP008727) VB Community Annotation]	NA	No	AFUN000905	3600.63	-0.302077	0.442731	-0.682303	0.495047	0.305353	0.613248	0.212364		AFUN000905	3458.16	-1.08266	0.542724	-1.99486	0.0460582	1.33669	0.412034	0.385067		AFUN000905	2919.93	0.0302752	0.434004	0.0697579	0.944386	0.0248503	1	0
AFUN000906	71264483	71265806	1324	others	No	cDNA	AFUN000906	others	6-pyruvoyltetrahydropterin/6-carboxytetrahydropterin synthase [Source:Projected from Anopheles gambiae (AGAP008730) VB Community Annotation]	NA	No	AFUN000906	144.632	0.204521	0.282377	0.724282	0.468892	0.328927	0.589952	0.229183		AFUN000906	82.6169	0.465005	0.846828	0.549113	0.582928	0.234385	0.963704	0.0160563		AFUN000906	132.455	0.359189	0.290714	1.23554	0.21663	0.664281	1	0
AFUN000907	71262894	71264309	1416	others	No	cDNA	AFUN000907	others	Alkaline ceramidase [Source:UniProtKB/TrEMBL;Acc:A0A182R416]	NA	No	AFUN000907	198.992	0.823553	0.249499	3.30083	0.000963992	3.01593	0.0036304	2.44005	x	AFUN000907	171.658	0.627817	0.707163	0.887796	0.37465	0.426374	0.89586	0.0477601		AFUN000907	194.52	-0.122986	0.275247	-0.446819	0.655006	0.183755	1	0
AFUN000912	66971151	66972580	1430	others	No	cDNA	AFUN000912	others	testis-specific serine kinase [Source:Projected from Anopheles gambiae (AGAP008735) VB Community Annotation]	NA	No	AFUN000912	111.597	1.37369	0.306266	4.48529	7.28144e-06	5.13778	4.87323e-05	4.31218	x	AFUN000912	69.1453	1.54196	0.905671	1.70256	0.0886502	1.05232	0.588297	0.230403		AFUN000912	108.991	0.284538	0.333357	0.853553	0.393353	0.405218	1	0
AFUN000913	66972833	66977723	4891	others	No	cDNA	AFUN000913	others	unspecified product	NA	No	AFUN000913	607.382	-0.0760312	0.14981	-0.507516	0.611793	0.213396	0.712646	0.147126		AFUN000913	458.579	-0.237788	0.605601	-0.392648	0.694579	0.158278	0.982577	0.00763328		AFUN000913	540.554	0.0825613	0.18952	0.435635	0.663102	0.17842	1	0
AFUN000914	66977881	66979171	1291	others	No	cDNA	AFUN000914	others	SUN domain-containing protein [Source:UniProtKB/TrEMBL;Acc:A0A182R423]	NA	No	AFUN000914	0.657516	0.520228	2.10654	0.246958	0.804941	0.0942361	0.865206	0.0628804		AFUN000914	1.45124	4.0134	5.83767	0.687502	0.491767	0.308241	1	0		AFUN000914	1.05688	-1.8906	2.11817	-0.892564	0.372091	0.429351	1	0
AFUN000915	66979456	67032704	53249	others	No	cDNA	AFUN000915	others	cytohesin-1 [Source:Projected from Anopheles gambiae (AGAP008737) VB Community Annotation]	NA	No	AFUN000915	2297.31	0.313282	0.16395	1.91084	0.0560249	1.25162	0.112801	0.947687		AFUN000915	1667.46	0.199615	0.559227	0.356947	0.721131	0.141986	0.984947	0.00658717		AFUN000915	2118.87	0.118029	0.206418	0.571797	0.567459	0.246065	1	0
AFUN000916	67033102	67037223	4122	others	No	cDNA	AFUN000916	others	unspecified product	NA	No	AFUN000916	3426.71	1.13555	0.244902	4.63676	3.53912e-06	5.4511	2.53194e-05	4.59655	x	AFUN000916	1996.1	1.06571	0.572356	1.86198	0.0626064	1.20338	0.495804	0.30469		AFUN000916	3248.71	0.415384	0.286084	1.45197	0.146511	0.834129	1	0
AFUN000921	67253628	67256071	2444	others	No	cDNA	AFUN000921	others	DHC_N2 domain-containing protein [Source:UniProtKB/TrEMBL;Acc:A0A182R430]	NA	No	AFUN000921	0.997267	3.36848	2.70239	1.24648	0.212589	0.67246	0.326153	0.486578		AFUN000921	0.483746	2.36608	6.09305	0.388325	0.697776	0.156284	1	0		AFUN000921	0.990857	0.830182	2.98225	0.278374	0.780725	0.107502	1	0
AFUN000922	67272591	67279000	6410	others	No	cDNA	AFUN000922	others	Protein bem46 [Source:Projected from Anopheles gambiae (AGAP008746) VB Community Annotation]	NA	No	AFUN000922	161.399	0.888329	0.17645	5.03445	4.79233e-07	6.31945	4.22699e-06	5.37397	x	AFUN000922	134.643	0.854296	0.754186	1.13274	0.257324	0.58952	0.827378	0.082296		AFUN000922	159.576	-0.117756	0.221494	-0.531643	0.594973	0.225503	1	0
AFUN000923	67279303	67282336	3034	others	No	cDNA	AFUN000923	others	RanBD1 domain-containing protein [Source:UniProtKB/TrEMBL;Acc:A0A182R432]	NA	No	AFUN000923	475.24	2.85137	0.185095	15.4049	1.51793e-53	52.8187	8.0722e-51	50.093	x	AFUN000923	342.313	2.58815	0.684241	3.78251	0.000155255	3.80895	0.00470008	2.32789	x	AFUN000923	493.084	0.110486	0.270958	0.407761	0.683449	0.165294	1	0
AFUN000924	67282401	67285312	2912	others	No	cDNA	AFUN000924	others	DNA repair and recombination protein RAD54 and RAD54-like protein [Source:Projected from Anopheles gambiae (AGAP008748) VB Community Annotation]	NA	No	AFUN000924	293.562	0.111726	0.226256	0.493805	0.621444	0.206598	0.721457	0.14179		AFUN000924	165.146	0.0477217	0.708351	0.0673702	0.946287	0.0239771	0.994196	0.00252795		AFUN000924	261.387	0.476674	0.244599	1.9488	0.051319	1.28972	1	0
AFUN000925	67285736	67292717	6982	others	No	cDNA	AFUN000925	others	alpha-1,2-Mannosidase [Source:UniProtKB/TrEMBL;Acc:A0A182R434]	NA	No	AFUN000925	974.376	0.759207	0.143327	5.29703	1.17704e-07	6.92921	1.17455e-06	5.93013	x	AFUN000925	714.724	0.602421	0.60525	0.995326	0.319578	0.495423	0.874187	0.0583955		AFUN000925	927.822	0.104847	0.214366	0.489102	0.62477	0.20428	1	0
AFUN000931	67450437	67454992	4556	others	No	cDNA	AFUN000931	others	unspecified product	NA	No	AFUN000931	40.3406	0.754492	0.507633	1.48629	0.137201	0.862642	0.232118	0.634291		AFUN000931	24.9886	1.45466	1.32503	1.09783	0.272279	0.564986	0.845258	0.0730105		AFUN000931	39.2608	0.177825	0.557472	0.318986	0.749737	0.125091	1	0
AFUN000932	67455252	67456021	770	others	No	cDNA	AFUN000932	others	Barrier-to-autointegration factor B [Source:Projected from Anopheles gambiae (AGAP008753) VB Community Annotation]	NA	No	AFUN000932	116.739	0.959156	0.200138	4.79248	1.64731e-06	5.78322	1.27577e-05	4.89423	x	AFUN000932	94.9946	0.671275	0.815469	0.823177	0.410407	0.386785	0.916714	0.0377664		AFUN000932	113.47	-0.011082	0.2159	-0.0513293	0.959063	0.0181528	1	0
AFUN000935	33400043	33401211	1169	others	No	cDNA	AFUN000935	others	unspecified product	NA	No	AFUN000935	2.51134	-3.48683	1.60107	-2.17781	0.0294202	1.53135	0.0665172	1.17707		AFUN000935	1.20669	-4.07275	5.80647	-0.701416	0.483043	0.316014	1	0		AFUN000935	1.63256	1.03371	2.78393	0.371315	0.710403	0.148495	1	0
AFUN000936	33396830	33398039	1210	CPs	Yes	cDNA	AFUN000936	others	cuticular protein RR-1 family [Source:Projected from Anopheles gambiae (AGAP002726) VB Community Annotation]	NA	No	AFUN000936	44.5206	-0.567935	0.432697	-1.31255	0.189336	0.722767	0.298701	0.524763		AFUN000936	41.8961	-0.0821746	1.06657	-0.0770457	0.938587	0.0275254	0.994196	0.00252795		AFUN000936	41.1461	-0.473979	0.525375	-0.902173	0.366965	0.435375	1	0
AFUN000938	33370051	33372125	2075	others	No	cDNA	AFUN000938	others	unspecified product	NA	No	AFUN000938	1.11357	-1.36563	1.56668	-0.871676	0.383385	0.416364	0.50722	0.294804		AFUN000938	0.796779	-1.39224	5.84685	-0.238118	0.81179	0.0905564	1	0		AFUN000938	0.85358	0.00270974	2.38276	0.00113722	0.999093	0.000394246	1	0
AFUN000940	33359586	33361084	1499	others	No	cDNA	AFUN000940	others	unspecified product	NA	No	AFUN000940	19.5553	-0.420934	0.414424	-1.01571	0.309768	0.508963	0.433839	0.362672		AFUN000940	23.5911	0.771645	1.43297	0.538495	0.590235	0.228975	0.963704	0.0160563		AFUN000940	20.667	-0.986744	0.600752	-1.64251	0.100483	0.997906	1	0
AFUN000942	33345898	33349673	3776	others	No	cDNA	AFUN000942	others	Tryptophan 2,3-dioxygenase [Source:UniProtKB/TrEMBL;Acc:A0A182R450]	NA	No	AFUN000942	869.071	-0.924068	0.517675	-1.78504	0.0742556	1.12927	0.142216	0.847053		AFUN000942	674.683	-1.31432	0.593541	-2.21438	0.0268029	1.57182	0.292483	0.533899		AFUN000942	687.151	0.191895	0.600965	0.319311	0.749491	0.125234	1	0
AFUN000947	33283941	33293220	9280	others	No	cDNA	AFUN000947	others	4-coumarate:CoA ligase isoform [Source:Projected from Anopheles gambiae (AGAP002718) UniProtKB/TrEMBL;Acc:Q7QCM8]	NA	No	AFUN000947	629.599	0.169072	0.175844	0.961488	0.336307	0.473264	0.461387	0.335934		AFUN000947	440.877	0.17431	0.603885	0.288647	0.772851	0.111904	0.985365	0.00640266		AFUN000947	577.24	0.134561	0.20699	0.650086	0.515637	0.287656	1	0
AFUN000948	33279059	33283857	4799	ABCs	Yes	cDNA	AFUN000948	ABCs	ATP-binding cassette transporter (ABC transporter) family B member [Source:Projected from Anopheles gambiae (AGAP002717) VB Community Annotation]	NA	Yes	AFUN000948	141.63	-0.615677	0.24274	-2.53637	0.0112009	1.95075	0.0298324	1.52531	x	AFUN000948	110.711	-0.771418	0.786788	-0.980466	0.326856	0.485643	0.878347	0.056334		AFUN000948	119.377	0.0549196	0.311687	0.176201	0.860136	0.0654329	1	0
AFUN000949	33277005	33278714	1710	others	No	cDNA	AFUN000949	others	E3 ubiquitin-protein ligase Hakai [Source:Projected from Anopheles gambiae (AGAP000339) VB Community Annotation]	NA	No	AFUN000949	172.29	0.0822463	0.218019	0.377243	0.705993	0.1512	0.791166	0.101732		AFUN000949	122.301	-0.0776297	0.757807	-0.10244	0.918408	0.0369646	0.992254	0.00337732		AFUN000949	154.87	0.1721	0.269361	0.638921	0.522874	0.281603	1	0
AFUN000950	33258131	33275016	16886	others	No	cDNA	AFUN000950	others	unspecified product	NA	No	AFUN000950	3095.39	0.707665	0.143596	4.92816	8.30093e-07	6.08087	6.94264e-06	5.15848	x	AFUN000950	2125.93	0.745449	0.579685	1.28595	0.198459	0.702329	0.772246	0.112244		AFUN000950	2949.1	0.155344	0.208996	0.743287	0.457308	0.339791	1	0
AFUN000951	33186007	33186762	756	others	No	cDNA	mRpL49	others	39S ribosomal protein L49, mitochondrial [Source:UniProtKB/TrEMBL;Acc:A0A182R459]	mRpL49	No	AFUN000951	124.518	0.505226	0.213909	2.36187	0.018183	1.74034	0.0446974	1.34972	x	AFUN000951	96.5595	0.16798	0.829774	0.20244	0.839572	0.0759418	0.985374	0.00639911		AFUN000951	115.441	0.0966954	0.276347	0.349905	0.72641	0.138818	1	0
AFUN000953	33184761	33185986	1226	others	No	cDNA	AFUN000953	others	unspecified product	NA	No	AFUN000953	168.986	0.375124	0.190884	1.96519	0.0493919	1.30634	0.101922	0.991731		AFUN000953	111.981	0.0115416	0.783162	0.0147372	0.988242	0.00513675	0.999499	0.000217778		AFUN000953	152.086	0.317265	0.248577	1.27632	0.201841	0.694991	1	0
AFUN000957	33141849	33154744	12896	others	No	cDNA	AFUN000957	others	unspecified product	NA	No	AFUN000957	888.465	-0.131595	0.128469	-1.02433	0.30568	0.514732	0.429244	0.367296		AFUN000957	649.048	-0.336257	0.589363	-0.570544	0.568309	0.245415	0.961835	0.0168995		AFUN000957	781.267	0.148683	0.172628	0.861293	0.389077	0.409965	1	0
AFUN000958	33070299	33072845	2547	others	No	cDNA	AFUN000958	others	unspecified product	NA	No	AFUN000958	52.993	0.542903	0.331909	1.6357	0.101902	0.991815	0.183439	0.736509		AFUN000958	47.0857	1.1368	1.08386	1.04885	0.294249	0.531285	0.857797	0.0666153		AFUN000958	54.0648	-0.319718	0.44391	-0.720233	0.471382	0.326627	1	0
AFUN000959	17210549	17213317	2769	others	No	cDNA	AFUN000959	others	unspecified product	NA	No	AFUN000959	0.942585	-0.638695	2.76671	-0.23085	0.817431	0.0875489	0.875658	0.0576656		AFUN000959	0.314105	2.05026	6.10794	0.335671	0.737119	0.132462	1	0		AFUN000959	0.885239	0.170034	3.169	0.0536554	0.95721	0.0189929	1	0
AFUN000960	17164669	17239071	74403	others	No	cDNA	AFUN000960	others	BAI1-associated protein [Source:Projected from Anopheles gambiae (AGAP005816) VB Community Annotation]	NA	No	AFUN000960	889.388	-0.49676	0.274873	-1.80723	0.0707258	1.15042	0.136645	0.864408		AFUN000960	691.103	-0.232322	0.63321	-0.366896	0.713697	0.146486	0.983533	0.00721112		AFUN000960	793.953	-0.11621	0.359279	-0.323454	0.746351	0.127057	1	0
AFUN000961	17161105	17164547	3443	others	No	cDNA	AFUN000961	others	cyclin-dependent kinase [Source:Projected from Anopheles gambiae (AGAP005817) VB Community Annotation]	NA	No	AFUN000961	239.647	0.0183528	0.250587	0.0732394	0.941616	0.0261264	0.961896	0.016872		AFUN000961	166.455	0.151793	0.706387	0.214886	0.829856	0.0809973	0.985365	0.00640266		AFUN000961	219.139	0.106904	0.291471	0.366775	0.713787	0.146432	1	0
AFUN000962	17159166	17160261	1096	others	No	cDNA	AFUN000962	others	nurim homolog [Source:Projected from Anopheles gambiae (AGAP005818) VB Community Annotation]	NA	No	AFUN000962	49.4675	0.804536	0.362462	2.21964	0.0264432	1.57769	0.0610504	1.21431		AFUN000962	48.6135	1.29127	1.13535	1.13733	0.255401	0.592777	0.825231	0.0834247		AFUN000962	52.0634	-0.433393	0.53434	-0.811082	0.417319	0.379532	1	0
AFUN000963	17156253	17158749	2497	others	No	cDNA	AFUN000963	others	unspecified product	NA	No	AFUN000963	224.603	0.1717	0.235376	0.729469	0.465715	0.33188	0.58746	0.231022		AFUN000963	228.337	0.196246	0.79331	0.247376	0.804617	0.0944107	0.985365	0.00640266		AFUN000963	216.081	-0.415096	0.383526	-1.08231	0.279113	0.55422	1	0
AFUN000964	17154725	17156003	1279	others	No	cDNA	AFUN000964	others	unspecified product	NA	No	AFUN000964	85.5127	-0.35146	0.181708	-1.9342	0.0530881	1.275	0.10803	0.966456		AFUN000964	63.009	-0.433311	0.938928	-0.461496	0.644443	0.190815	0.974174	0.0113633		AFUN000964	74.5686	0.11919	0.275536	0.432575	0.665324	0.176967	1	0
AFUN000965	17104357	17106048	1692	others	No	cDNA	AFUN000965	others	unspecified product	NA	No	AFUN000965	560.031	1.18645	0.346688	3.42224	0.000621068	3.20686	0.00248019	2.60552	x	AFUN000965	507.4	1.46018	0.717336	2.03556	0.0417944	1.37888	0.387739	0.411461		AFUN000965	584.905	-0.279614	0.47359	-0.590413	0.554914	0.255774	1	0
AFUN000968	28183201	28187083	3883	others	No	cDNA	AFUN000968	others	unspecified product	NA	No	AFUN000968	812.309	0.917868	0.261309	3.51258	0.000443784	3.35283	0.00186439	2.72946	x	AFUN000968	465.876	0.96457	0.637745	1.51247	0.130414	0.884674	0.679116	0.168056		AFUN000968	764.74	0.413265	0.30692	1.34649	0.178144	0.74923	1	0
AFUN000969	28187137	28188424	1288	others	No	cDNA	CycC	others	Cyclin C [Source:UniProtKB/TrEMBL;Acc:A0A182R477]	CycC	No	AFUN000969	100.527	1.01971	0.186444	5.46925	4.51932e-08	7.34493	4.82678e-07	6.31634	x	AFUN000969	71.5501	0.750258	0.891006	0.842035	0.399769	0.398191	0.912653	0.0396943		AFUN000969	96.292	0.159857	0.228888	0.698407	0.484923	0.314328	1	0
AFUN000971	28192331	28195406	3076	others	No	cDNA	AFUN000971	others	unspecified product	NA	No	AFUN000971	357.269	-0.203983	0.166979	-1.22161	0.221856	0.653929	0.336928	0.472462		AFUN000971	253.093	-0.183968	0.652323	-0.28202	0.777928	0.109061	0.985365	0.00640266		AFUN000971	317.976	0.110378	0.202979	0.543791	0.586585	0.231669	1	0
AFUN000975	420797	422196	1400	others	No	cDNA	AFUN000975	others	salivary gland protein [Source:Projected from Anopheles gambiae (AGAP000612) VB Community Annotation]	NA	No	AFUN000975	139.831	-1.29552	0.348286	-3.7197	0.000199457	3.70015	0.00092101	3.03574	x	AFUN000975	137.909	-1.60564	0.816655	-1.96611	0.0492857	1.30728	0.429458	0.367079		AFUN000975	104.756	-0.170057	0.446542	-0.38083	0.70333	0.152841	1	0
AFUN000976	422686	424032	1347	others	No	cDNA	AFUN000976	others	salivary gland protein 1-like [Source:Projected from Anopheles gambiae (AGAP000611) VB Community Annotation]	NA	No	AFUN000976	60.4047	-0.624844	0.295779	-2.11254	0.0346406	1.46041	0.0760395	1.11896		AFUN000976	71.8396	-0.110873	0.958504	-0.115673	0.907912	0.0419564	0.991504	0.00370554		AFUN000976	57.2754	-0.813564	0.427833	-1.90159	0.0572246	1.24242	1	0
AFUN000978	427669	428949	1281	others	No	cDNA	AFUN000978	others	salivary gland protein 1-like [Source:Projected from Anopheles gambiae (AGAP000607) VB Community Annotation]	NA	No	AFUN000978	495.468	-0.3814	0.295774	-1.2895	0.197225	0.705038	0.308478	0.510775		AFUN000978	575.626	-0.0987638	0.731315	-0.13505	0.892573	0.0493564	0.990567	0.00411626		AFUN000978	468.765	-0.697733	0.426744	-1.63502	0.102045	0.991206	1	0
AFUN000980	71307260	71308216	957	others	No	cDNA	AFUN000980	others	COP9 signalosome complex subunit [Source:Projected from Anopheles gambiae (AGAP008857) VB Community Annotation]	NA	No	AFUN000980	151.317	0.747679	0.194454	3.84501	0.000120547	3.91885	0.000591972	3.2277	x	AFUN000980	139.017	0.938497	0.763782	1.22875	0.219165	0.659228	0.794258	0.100038		AFUN000980	153.239	-0.288778	0.265621	-1.08718	0.276957	0.557588	1	0
AFUN000981	71308752	71314968	6217	others	No	cDNA	AFUN000981	others	MPN domain-containing protein [Source:UniProtKB/TrEMBL;Acc:A0A182R489]	NA	No	AFUN000981	612.035	0.205525	0.127949	1.6063	0.108209	0.965738	0.192349	0.715909		AFUN000981	457.333	0.192886	0.621933	0.31014	0.756454	0.121217	0.985365	0.00640266		AFUN000981	565.86	0.0423128	0.1951	0.216878	0.828303	0.0818106	1	0
AFUN000985	71407426	71411501	4076	others	No	cDNA	AFUN000985	others	argonaute [Source:Projected from Anopheles gambiae (AGAP008862) VB Community Annotation]	NA	No	AFUN000985	797.75	0.460412	0.121404	3.79239	0.000149204	3.82622	0.000713753	3.14645	x	AFUN000985	544.851	0.214386	0.590507	0.363055	0.716564	0.144745	0.984531	0.00677044		AFUN000985	731.795	0.24088	0.150471	1.60084	0.109412	0.960934	1	0
AFUN000986	71412558	71418131	5574	others	No	cDNA	AFUN000986	others	unspecified product	NA	No	AFUN000986	2226.48	0.115624	0.163113	0.708862	0.47841	0.3202	0.598152	0.223188		AFUN000986	1688.79	0.442441	0.557867	0.793094	0.427723	0.368837	0.923499	0.0345635		AFUN000986	2104.95	-0.0734297	0.183953	-0.399177	0.689763	0.1613	1	0
AFUN000988	71486041	71486966	926	others	No	cDNA	AFUN000988	others	unspecified product	NA	No	AFUN000988	74.0667	-0.934003	0.275334	-3.39226	0.000693194	3.15915	0.00272726	2.56427	x	AFUN000988	52.3094	-1.41313	0.993321	-1.42263	0.154842	0.810111	0.716053	0.145055		AFUN000988	58.1059	0.364546	0.381494	0.955574	0.339288	0.469432	1	0
AFUN000991	71505358	71507436	2079	others	No	cDNA	AFUN000991	others	gamma-tubulin complex component [Source:Projected from Anopheles gambiae (AGAP008847) VB Community Annotation]	NA	No	AFUN000991	264.281	-0.341768	0.13317	-2.5664	0.0102761	1.98817	0.0277456	1.55681	x	AFUN000991	198.333	-0.408309	0.685555	-0.59559	0.551449	0.258495	0.955498	0.0197701		AFUN000991	231.109	0.0560362	0.183731	0.30499	0.760373	0.118973	1	0
AFUN000992	71507396	71508665	1270	others	No	cDNA	AFUN000992	others	unspecified product	NA	No	AFUN000992	212.6	-1.22311	0.156076	-7.83665	4.62716e-15	14.3347	1.45819e-13	12.8362	x	AFUN000992	144.578	-1.68868	0.736948	-2.29146	0.0219371	1.65882	0.254512	0.594292		AFUN000992	162.36	0.437229	0.230257	1.89887	0.0575812	1.23972	1	0
AFUN000993	71509386	71513578	4193	others	No	cDNA	AFUN000993	others	unspecified product	NA	No	AFUN000993	446.892	-0.29828	0.249625	-1.19491	0.232122	0.634284	0.349031	0.457136		AFUN000993	341.169	-0.0323863	0.637519	-0.0508005	0.959485	0.017962	0.995906	0.00178163		AFUN000993	406.05	-0.081463	0.303604	-0.268319	0.788453	0.103224	1	0
AFUN000994	71514396	71516784	2389	IMPs	Yes	cDNA	AFUN000994	others	Galectin [Source:UniProtKB/TrEMBL;Acc:A0A182R4A2]	NA	No	AFUN000994	363.63	0.0895494	0.198	0.452269	0.651075	0.186369	0.747139	0.126599		AFUN000994	255.776	0.0567184	0.65066	0.0871705	0.930536	0.0312668	0.994057	0.00258862		AFUN000994	330.412	0.141661	0.238621	0.593666	0.552736	0.257482	1	0
AFUN000995	71517188	71518903	1716	others	No	cDNA	AQP1	others	aquaporin	AQP1	No	AFUN000995	328.312	-0.178763	0.26492	-0.674779	0.499816	0.30119	0.617465	0.209388		AFUN000995	257.528	-0.936006	0.656271	-1.42625	0.153796	0.813054	0.714758	0.145841		AFUN000995	271.411	0.291297	0.269197	1.08209	0.279211	0.554067	1	0
AFUN000999	95744129	95746648	2520	others	No	cDNA	AFUN000999	others	minor histocompatibility antigen H13 [Source:Projected from Anopheles gambiae (AGAP008838) VB Community Annotation]	NA	No	AFUN000999	867.778	-0.377602	0.164206	-2.29957	0.0214727	1.66811	0.0513118	1.28978		AFUN000999	763.854	0.0530595	0.589085	0.0900711	0.928231	0.0323441	0.993824	0.00269058		AFUN000999	807.257	-0.345835	0.216935	-1.59418	0.110895	0.955087	1	0
AFUN001000	95746744	95747618	875	others	No	cDNA	AFUN001000	others	Proteasome subunit beta [Source:UniProtKB/TrEMBL;Acc:A0A182R4A9]	NA	No	AFUN001000	317.365	0.879621	0.168913	5.20753	1.91369e-07	6.71813	1.82408e-06	5.73896	x	AFUN001000	273.238	1.01061	0.650767	1.55295	0.120436	0.919243	0.663033	0.178465		AFUN001000	319.062	-0.185058	0.207968	-0.889837	0.373553	0.427647	1	0
AFUN001001	95747932	95752969	5038	others	No	cDNA	AFUN001001	others	Crossover junction endonuclease MUS81 [Source:Projected from Anopheles gambiae (AGAP008836) UniProtKB/TrEMBL;Acc:A0A1S4H039]	NA	No	AFUN001001	260.949	0.517213	0.264243	1.95734	0.0503073	1.29837	0.103468	0.985192		AFUN001001	217.291	0.83421	0.690504	1.20812	0.227002	0.64397	0.800183	0.0968109		AFUN001001	257.619	-0.18511	0.324798	-0.569923	0.56873	0.245094	1	0
AFUN001003	95754833	95788279	33447	others	No	cDNA	AFUN001003	others	unspecified product	NA	No	AFUN001003	348.544	-0.183959	0.137174	-1.34107	0.179899	0.744971	0.286541	0.542813		AFUN001003	280.691	-0.348103	0.656011	-0.530635	0.595671	0.224993	0.965995	0.015025		AFUN001003	308.322	0.00406163	0.190953	0.0212703	0.98303	0.0074332	1	0
AFUN001007	88154270	88164602	10333	others	No	cDNA	AFUN001007	others	unspecified product	NA	No	AFUN001007	1509.95	-0.48408	0.150629	-3.21372	0.0013103	2.88263	0.00474285	2.32396	x	AFUN001007	1167.45	-1.00281	0.559054	-1.79377	0.0728504	1.13757	0.537163	0.269894		AFUN001007	1238.79	0.231377	0.131629	1.75779	0.0787832	1.10357	1	0
AFUN001008	88164943	88171178	6236	others	No	cDNA	AFUN001008	others	unspecified product	NA	No	AFUN001008	1363.29	-0.914211	0.166076	-5.50476	3.69673e-08	7.43218	3.99503e-07	6.39848	x	AFUN001008	1091.81	-0.658451	0.579774	-1.1357	0.256081	0.591623	0.825672	0.0831926		AFUN001008	1164.6	-0.173897	0.222049	-0.783147	0.433541	0.36297	1	0
AFUN001009	88171190	88173148	1959	others	No	cDNA	AFUN001009	others	unspecified product	NA	No	AFUN001009	17.599	-0.2245	0.564268	-0.397861	0.690733	0.16069	0.778921	0.108507		AFUN001009	12.1995	-0.261086	1.77146	-0.147385	0.882829	0.0541237	0.990097	0.00432229		AFUN001009	15.5184	0.160134	0.719972	0.222416	0.82399	0.0840782	1	0
AFUN001010	88178866	88180548	1683	others	No	cDNA	RpL27a	others	60S ribosomal protein L27a	RpL27a	No	AFUN001010	13125.8	-0.748261	0.1682	-4.44864	8.64168e-06	5.0634	5.69699e-05	4.24435	x	AFUN001010	10516.5	-0.742346	0.545231	-1.36152	0.173348	0.761081	0.746121	0.127191		AFUN001010	11105	-0.0600648	0.212068	-0.283234	0.776998	0.10958	1	0
AFUN001011	88181023	88198858	17836	others	No	cDNA	AFUN001011	others	unspecified product	NA	No	AFUN001011	1148.53	0.659471	0.111516	5.91367	3.34566e-09	8.47552	4.3132e-08	7.3652	x	AFUN001011	888.954	0.438471	0.58012	0.755829	0.449752	0.347027	0.925967	0.0334046		AFUN001011	1088.4	0.0456101	0.147133	0.309993	0.756566	0.121153	1	0
AFUN001012	88199584	88202393	2810	others	No	cDNA	AFUN001012	others	unspecified product	NA	No	AFUN001012	182.843	0.0223351	0.216851	0.102997	0.917965	0.0371738	0.946572	0.0238462		AFUN001012	127.604	0.164488	0.75413	0.218117	0.827338	0.0823169	0.985365	0.00640266		AFUN001012	167.466	0.101226	0.258583	0.391465	0.695453	0.157732	1	0
AFUN001013	88211189	88217506	6318	others	No	cDNA	AFUN001013	others	unspecified product	NA	No	AFUN001013	5.51205	-1.42848	0.9339	-1.52959	0.126119	0.899218	0.217228	0.663083		AFUN001013	2.48828	-0.935118	3.63411	-0.257317	0.796934	0.0985776	1	0		AFUN001013	4.54945	0.580352	1.34293	0.432155	0.665629	0.176768	1	0
AFUN001014	88221976	88225762	3787	others	No	cDNA	AFUN001014	others	unspecified product	NA	No	AFUN001014	6.49041	0.810247	1.04109	0.778265	0.436413	0.360102	0.560582	0.251361		AFUN001014	3.84157	-0.282438	2.95636	-0.0955356	0.923889	0.03438	0.992781	0.00314639		AFUN001014	5.66061	0.728881	1.28195	0.568573	0.569646	0.244395	1	0
AFUN001015	88225976	88238311	12336	others	No	cDNA	AFUN001015	others	unspecified product	NA	No	AFUN001015	2014.77	-0.336595	0.103102	-3.26468	0.00109589	2.96023	0.00405063	2.39248	x	AFUN001015	1502.96	-0.390777	0.552638	-0.707113	0.479496	0.319215	0.933957	0.0296733		AFUN001015	1764.66	0.0664564	0.126224	0.526496	0.598544	0.222904	1	0
AFUN001016	88238733	88243950	5218	others	No	cDNA	AFUN001016	others	predicted G-protein coupled receptor GPCR [Source:Projected from Anopheles gambiae (AGAP011701) VB Community Annotation]	NA	No	AFUN001016	445.522	0.0888974	0.137258	0.647666	0.517201	0.28634	0.632344	0.199047		AFUN001016	340.794	0.29415	0.622417	0.472593	0.636503	0.196199	0.972766	0.0119916		AFUN001016	416.628	-0.0512231	0.158526	-0.323121	0.746603	0.12691	1	0
AFUN001017	88245412	88332092	86681	others	No	cDNA	AFUN001017	others	unspecified product	NA	No	AFUN001017	2794.06	-0.427887	0.136883	-3.12593	0.00177244	2.75143	0.00615388	2.21085	x	AFUN001017	2332.02	-0.222486	0.547926	-0.406051	0.684705	0.164496	0.982577	0.00763328		AFUN001017	2511.52	-0.195094	0.170384	-1.14503	0.252198	0.598259	1	0
AFUN001018	88333063	88334563	1501	others	No	cDNA	AFUN001018	others	duplex-specific nuclease [Source:Projected from Anopheles gambiae (AGAP011696) VB Community Annotation]	NA	No	AFUN001018	91.7196	0.441677	0.255065	1.73162	0.0833406	1.07914	0.155896	0.807166		AFUN001018	77.5804	1.18169	0.873003	1.3536	0.175865	0.754821	0.751576	0.124027		AFUN001018	92.9168	-0.29232	0.277512	-1.05336	0.292177	0.534354	1	0
AFUN001025	88428877	88430546	1670	others	No	cDNA	AFUN001025	others	Dynactin subunit [Source:Projected from Anopheles gambiae (AGAP011690) UniProtKB/Swiss-Prot;Acc:Q7PZ25]	NA	No	AFUN001025	327.547	-0.420723	0.157282	-2.67496	0.00747387	2.12645	0.0210665	1.67641	x	AFUN001025	249.977	-0.284622	0.652307	-0.436331	0.662597	0.178751	0.979992	0.00877744		AFUN001025	290.418	-0.0387094	0.194079	-0.199452	0.841909	0.0747347	1	0
AFUN001026	88430580	88433517	2938	others	No	cDNA	AFUN001026	others	unspecified product	NA	No	AFUN001026	497.489	0.451642	0.125504	3.59864	0.000319882	3.49501	0.00139865	2.85429	x	AFUN001026	349.244	0.158218	0.630413	0.250975	0.801833	0.0959159	0.985365	0.00640266		AFUN001026	455.589	0.211737	0.172035	1.23078	0.218406	0.660736	1	0
AFUN001027	88434051	88442556	8506	others	No	cDNA	AFUN001027	others	histone-lysine N-methyltransferase SETD2 [Source:Projected from Anopheles gambiae (AGAP011688) VB Community Annotation]	NA	No	AFUN001027	709.482	-0.122577	0.194076	-0.631594	0.527652	0.277652	0.640935	0.193186		AFUN001027	468.654	-0.255457	0.601936	-0.424392	0.67128	0.173097	0.982031	0.00787499		AFUN001027	624.275	0.267697	0.231195	1.15788	0.246912	0.607459	1	0
AFUN001028	88442877	88444297	1421	others	No	cDNA	RpL27	others	60S ribosomal protein L27 [Source:UniProtKB/TrEMBL;Acc:A0A182R4D6]	RpL27	No	AFUN001028	17599.5	-1.03443	0.156065	-6.62816	3.39907e-11	10.4686	6.02491e-10	9.22005	x	AFUN001028	13707.5	-0.883484	0.534063	-1.65427	0.0980726	1.00845	0.612531	0.212872		AFUN001028	14639.4	-0.091015	0.185106	-0.491692	0.622937	0.205556	1	0
AFUN001030	2254072	2256525	2454	others	No	cDNA	AFUN001030	others	Suppression of tumorigenicity [Source:Projected from Anopheles gambiae (AGAP007524) VB Community Annotation]	NA	No	AFUN001030	132.083	1.6208	0.221942	7.30281	2.81818e-13	12.55	6.83809e-12	11.1651	x	AFUN001030	88.8449	1.63656	0.838471	1.95183	0.050958	1.29279	0.437858	0.358666		AFUN001030	131.261	0.191921	0.245808	0.780775	0.434935	0.361576	1	0
AFUN001033	2302417	2303935	1519	others	No	cDNA	AFUN001033	others	Adaptor-related protein complex 3, sigma 1 subunit [Source:Projected from Anopheles gambiae (AGAP007522) VB Community Annotation]	NA	No	AFUN001033	229.833	0.301511	0.181434	1.66182	0.0965483	1.01526	0.175534	0.75564		AFUN001033	180.415	0.134155	0.693117	0.193553	0.846526	0.0723598	0.985614	0.00629311		AFUN001033	212.619	0.0237516	0.214139	0.110917	0.911682	0.0401565	1	0
AFUN001034	2304842	2313678	8837	others	No	cDNA	AFUN001034	others	ubiquitin carboxyl-terminal hydrolase 36/42 [Source:Projected from Anopheles gambiae (AGAP007521) VB Community Annotation]	NA	No	AFUN001034	2603.02	0.59418	0.186254	3.19017	0.00142191	2.84713	0.0050877	2.29348	x	AFUN001034	1755.84	0.427872	0.661839	0.646489	0.517963	0.285702	0.948683	0.0228789		AFUN001034	2422.12	0.233743	0.334323	0.699153	0.484457	0.314745	1	0
AFUN001035	2313807	2316119	2313	others	No	cDNA	AFUN001035	others	Peroxisomal membrane protein PMP34 [Source:Projected from Anopheles gambiae (AGAP007520) VB Community Annotation]	NA	No	AFUN001035	279.701	0.76053	0.152736	4.97937	6.37905e-07	6.19524	5.4715e-06	5.26189	x	AFUN001035	204.263	0.347215	0.688183	0.504539	0.613883	0.211915	0.969848	0.0132962		AFUN001035	261.188	0.171479	0.184685	0.928491	0.353153	0.452037	1	0
AFUN001036	2316388	2317892	1505	others	No	cDNA	mRpS22	others	28S ribosomal protein S22, mitochondrial	mRpS22	No	AFUN001036	361.172	0.0857364	0.137821	0.622087	0.533885	0.272553	0.64618	0.189646		AFUN001036	275.321	0.122999	0.64196	0.1916	0.848056	0.0715755	0.985937	0.0061508		AFUN001036	332.73	0.00145498	0.17148	0.00848483	0.99323	0.0029501	1	0
AFUN001037	2318061	2321036	2976	others	No	cDNA	AFUN001037	others	unspecified product	NA	No	AFUN001037	313.343	-0.379711	0.191726	-1.98049	0.047648	1.32196	0.0989314	1.00467		AFUN001037	262.25	-0.16809	0.649075	-0.258968	0.79566	0.0992724	0.985365	0.00640266		AFUN001037	283.29	-0.200884	0.235509	-0.852979	0.393671	0.404867	1	0
AFUN001038	2324718	2328587	3870	others	No	cDNA	AFUN001038	others	transcription initiation factor TFIID TATA-box-binding protein [Source:Projected from Anopheles gambiae (AGAP007517) VB Community Annotation]	NA	No	AFUN001038	609.381	0.201768	0.124456	1.62121	0.104973	0.978923	0.187748	0.726425		AFUN001038	442.803	0.285489	0.617515	0.462319	0.643852	0.191214	0.973821	0.011521		AFUN001038	565.936	0.053982	0.174603	0.309169	0.757193	0.120793	1	0
AFUN001040	2338291	2435999	97709	others	No	cDNA	AFUN001040	others	phosphatidylinositol 4-kinase [Source:Projected from Anopheles gambiae (AGAP007512) VB Community Annotation]	NA	No	AFUN001040	5692.21	-0.00505378	0.115089	-0.0439118	0.964975	0.0154841	0.97738	0.0099364		AFUN001040	4289.01	-0.0185464	0.541234	-0.0342669	0.972664	0.012037	0.997289	0.00117892		AFUN001040	5171.53	0.0353682	0.14501	0.243901	0.807307	0.092961	1	0
AFUN001041	87531574	87533711	2138	others	No	cDNA	AFUN001041	others	DNA_pol_B domain-containing protein [Source:UniProtKB/TrEMBL;Acc:A0A182R4E9]	NA	No	AFUN001041	49.2024	-1.16839	0.441538	-2.64617	0.00814085	2.08933	0.0227058	1.64386	x	AFUN001041	20.3627	-1.13462	1.43395	-0.791257	0.428794	0.367751	0.923499	0.0345635		AFUN001041	40.0631	0.900187	0.544682	1.65268	0.0983955	1.00702	1	0
AFUN001042	87533758	87535646	1889	others	No	cDNA	AFUN001042	others	ADP-ribosylation factor-like protein [Source:Projected from Anopheles gambiae (AGAP011730) VB Community Annotation]	NA	No	AFUN001042	297.753	-0.962174	0.159251	-6.04187	1.52339e-09	8.81719	2.06841e-08	7.68436	x	AFUN001042	249.047	-0.667676	0.656254	-1.01741	0.30896	0.510097	0.865303	0.0628318		AFUN001042	254.454	-0.260737	0.206242	-1.26423	0.206148	0.685821	1	0
AFUN001043	87536389	87537819	1431	others	No	cDNA	AFUN001043	others	Nonspecific nucleoside hydrolase [Source:Projected from Anopheles gambiae (AGAP011729) VB Community Annotation]	NA	No	AFUN001043	69.9594	-0.943904	0.274444	-3.43934	0.000583145	3.23422	0.00234785	2.62933	x	AFUN001043	61.9779	-1.17362	0.929177	-1.26307	0.206564	0.684946	0.780829	0.107444		AFUN001043	56.1139	-0.0797592	0.339389	-0.235008	0.814202	0.0892677	1	0
AFUN001046	87626233	87628051	1819	others	No	cDNA	AFUN001046	others	F-box domain-containing protein [Source:UniProtKB/TrEMBL;Acc:A0A182R4F4]	NA	No	AFUN001046	81.4396	0.160427	0.372728	0.430412	0.666896	0.175942	0.760167	0.119091		AFUN001046	85.6383	1.10673	0.866933	1.27661	0.201741	0.695207	0.776602	0.109802		AFUN001046	85.7938	-0.686025	0.444257	-1.54421	0.122538	0.911729	1	0
AFUN001047	87630281	87632851	2571	others	No	cDNA	AFUN001047	others	syntaxin [Source:Projected from Anopheles gambiae (AGAP011727) VB Community Annotation]	NA	No	AFUN001047	429.266	-0.85005	0.19891	-4.27354	1.92394e-05	4.71581	0.000115772	3.9364	x	AFUN001047	366.985	-0.946248	0.617716	-1.53185	0.12556	0.901149	0.67185	0.172727		AFUN001047	354.763	-0.103398	0.231828	-0.446013	0.655588	0.183369	1	0
AFUN001049	87634385	87658906	24522	others	No	cDNA	AFUN001049	others	unspecified product	NA	No	AFUN001049	3464.67	-0.173774	0.102424	-1.69661	0.0897705	1.04687	0.165402	0.781459		AFUN001049	2398.08	-0.176677	0.545213	-0.32405	0.7459	0.127319	0.984947	0.00658717		AFUN001049	3080.54	0.154034	0.110217	1.39755	0.162247	0.789824	1	0
AFUN001050	87666219	87667517	1299	others	No	cDNA	AFUN001050	others	Adenosylhomocysteinase [Source:UniProtKB/TrEMBL;Acc:A0A182R4F8]	NA	No	AFUN001050	24.1503	-1.14065	0.416762	-2.73694	0.00620129	2.20752	0.0180111	1.74446	x	AFUN001050	18.0178	-1.2875	1.49285	-0.862449	0.388441	0.410675	0.902954	0.0443346		AFUN001050	19.182	0.135489	0.578559	0.234184	0.814842	0.0889265	1	0
AFUN001051	87662036	87688982	26947	others	No	cDNA	AFUN001051	others	unspecified product	NA	No	AFUN001051	586.086	-0.56221	0.203219	-2.76652	0.00566576	2.24674	0.0167273	1.77657	x	AFUN001051	462.487	-0.514959	0.642972	-0.800905	0.423187	0.373468	0.922272	0.0351412		AFUN001051	508.485	-0.0527202	0.289809	-0.181914	0.85565	0.0677037	1	0
AFUN001052	87689352	87691411	2060	others	No	cDNA	AFUN001052	others	mannose-1-phosphate guanylyltransferase [Source:Projected from Anopheles gambiae (AGAP011723) VB Community Annotation]	NA	No	AFUN001052	220.573	-0.49783	0.14702	-3.38614	0.000708834	3.14946	0.00278022	2.55592	x	AFUN001052	179.503	-0.305452	0.694049	-0.440101	0.659864	0.180545	0.979146	0.00915236		AFUN001052	196.115	-0.15203	0.190715	-0.797157	0.42536	0.371243	1	0
AFUN001056	87762582	87765009	2428	others	No	cDNA	AFUN001056	others	unspecified product	NA	No	AFUN001056	112.767	-0.751388	0.241766	-3.10791	0.00188417	2.72488	0.00647836	2.18853	x	AFUN001056	92.747	-0.657514	0.868343	-0.757205	0.448927	0.347824	0.925841	0.0334637		AFUN001056	96.5258	-0.123312	0.366896	-0.336095	0.736799	0.132651	1	0
AFUN001059	87909474	87912701	3228	others	No	cDNA	AFUN001059	others	lysosomal acid lipase [Source:Projected from Anopheles gambiae (AGAP011718) VB Community Annotation]	NA	No	AFUN001059	2.05488	-2.57918	1.51404	-1.70351	0.0884731	1.05319	0.163365	0.78684		AFUN001059	2.149	-1.31607	4.22143	-0.311759	0.755224	0.121924	1	0		AFUN001059	1.59184	-1.31633	2.24377	-0.58666	0.557432	0.253808	1	0
AFUN001061	87930577	87932248	1672	others	No	cDNA	mRpL53	others	39S ribosomal protein L53, mitochondrial	mRpL53	No	AFUN001061	182.988	0.369099	0.186825	1.97564	0.0481958	1.31699	0.0999063	1.00041		AFUN001061	128.346	-0.288546	0.781376	-0.369279	0.71192	0.147569	0.983442	0.00725111		AFUN001061	161.155	0.334095	0.249371	1.33975	0.180326	0.743942	1	0
AFUN001062	87941775	87955567	13793	others	No	cDNA	AFUN001062	others	unspecified product	NA	No	AFUN001062	1631.78	-0.487942	0.228477	-2.13562	0.03271	1.48532	0.0725544	1.13934		AFUN001062	1305.28	-0.829813	0.556062	-1.4923	0.13562	0.867676	0.68901	0.161774		AFUN001062	1366.54	0.0958194	0.253835	0.377488	0.705811	0.151311	1	0
AFUN001064	88013423	88013594	172	others	No	cDNA	AFUN001064	others	unspecified product	NA	No	AFUN001064	0.375682	-2.48042	3.40594	-0.728263	0.466452	0.331193	1	0		AFUN001064	0.482674	-2.75089	5.85998	-0.469437	0.638757	0.194664	1	0		AFUN001064	0.136642	0	4.08048	0	1	0	1	0
AFUN001066	16455281	16492413	37133	others	No	cDNA	AFUN001066	others	unspecified product	NA	No	AFUN001066	386.104	-1.02795	0.230857	-4.45277	8.47691e-06	5.07176	5.59994e-05	4.25182	x	AFUN001066	281.462	-0.693665	0.662291	-1.04737	0.294928	0.530284	0.857797	0.0666153		AFUN001066	327.486	-0.0757864	0.288474	-0.262714	0.792771	0.100852	1	0
AFUN001067	16421364	16423667	2304	others	No	cDNA	AFUN001067	others	unspecified product	NA	No	AFUN001067	328.724	0.381619	0.264328	1.44373	0.148815	0.827354	0.246799	0.607656		AFUN001067	191.746	0.720651	0.687173	1.04872	0.294308	0.531199	0.857797	0.0666153		AFUN001067	306.234	0.312361	0.248886	1.25504	0.209465	0.678888	1	0
AFUN001068	16405776	16408123	2348	others	No	cDNA	AFUN001068	others	growth arrest-specific protein 8 homolog [Source:Projected from Anopheles gambiae (AGAP005850) VB Community Annotation]	NA	No	AFUN001068	1.93511	-4.25786	2.10664	-2.02117	0.0432626	1.36389	0.0913567	1.03926		AFUN001068	2.41337	-5.07279	4.42143	-1.14732	0.25125	0.599894	1	0		AFUN001068	0.729913	0.00707704	4.08048	0.00173436	0.998616	0.000601402	1	0
AFUN001070	16387428	16387946	519	others	No	cDNA	mRpL42	others	39S ribosomal protein L42, mitochondrial	mRpL42	No	AFUN001070	88.9069	-0.656649	1.68917	-0.38874	0.697468	0.156475	0.784091	0.105633		AFUN001070	59.1276	-9.6876	1.75252	-5.52781	3.24252e-08	7.48912	2.12775e-06	5.67208	x	AFUN001070	51.9276	8.05989	2.69947	2.98573	0.00282899	2.54837	0.663982	0.177844
AFUN001071	16379676	16382226	2551	others	No	cDNA	AFUN001071	others	unspecified product	NA	No	AFUN001071	0.769313	2.9789	2.78264	1.07053	0.284381	0.546099	0.40737	0.390011		AFUN001071	0	NA	NA	NA	NA	#VALUE!	1	0		AFUN001071	0.631728	2.05787	3.80543	0.54077	0.588666	0.230131	1	0
AFUN001072	16377584	16378345	762	others	No	cDNA	AFUN001072	others	unspecified product	NA	No	AFUN001072	2.07941	-0.892099	2.1605	-0.412912	0.679671	0.167701	0.769818	0.113612		AFUN001072	0	NA	NA	NA	NA	#VALUE!	1	0		AFUN001072	1.70725	2.53692	2.9449	0.861462	0.388984	0.410069	1	0
AFUN001073	16370683	16374780	4098	others	No	cDNA	AFUN001073	others	nodal modulator [Source:Projected from Anopheles gambiae (AGAP005856) VB Community Annotation]	NA	No	AFUN001073	1047.78	-0.0992354	0.14084	-0.704596	0.481062	0.317799	0.600157	0.221735		AFUN001073	716.698	-0.20876	0.598035	-0.349077	0.727031	0.138447	0.984947	0.00658717		AFUN001073	927.98	0.206994	0.202221	1.0236	0.306023	0.514246	1	0
AFUN001074	16368958	16370459	1502	others	No	cDNA	AFUN001074	others	actin-related protein [Source:Projected from Anopheles gambiae (AGAP005857) VB Community Annotation]	NA	No	AFUN001074	11.65	0.387232	0.654659	0.591502	0.554184	0.256346	0.663706	0.178024		AFUN001074	7.31824	-1.78391	2.34246	-0.761555	0.446326	0.350348	0.925565	0.0335928		AFUN001074	8.90438	1.34788	0.918548	1.4674	0.142266	0.846899	1	0
AFUN001075	16367343	16368945	1603	others	No	cDNA	AFUN001075	others	Protein lin-7 homolog [Source:UniProtKB/TrEMBL;Acc:A0A182R4I3]	NA	No	AFUN001075	106.202	-0.0569006	0.203064	-0.28021	0.779316	0.108286	0.844308	0.0734991		AFUN001075	74.9057	-0.120936	0.918543	-0.13166	0.895253	0.0480542	0.991504	0.00370554		AFUN001075	95.1	0.169287	0.325793	0.519616	0.603332	0.219444	1	0
AFUN001076	16365819	16366829	1011	others	No	cDNA	AFUN001076	others	unspecified product	NA	No	AFUN001076	0.194006	1.40415	3.53382	0.397347	0.691111	0.160452	1	0		AFUN001076	0	NA	NA	NA	NA	#VALUE!	1	0		AFUN001076	0.159297	0.487944	4.08048	0.11958	0.904816	0.0434398	1	0
AFUN001077	16362564	16364871	2308	others	No	cDNA	AFUN001077	others	unspecified product	NA	No	AFUN001077	484.518	-0.0864091	0.386155	-0.223768	0.822938	0.0846331	0.879072	0.0559755		AFUN001077	360.09	-0.601386	0.632665	-0.950559	0.341828	0.466192	0.881667	0.0546952		AFUN001077	415.194	0.250782	0.450039	0.557245	0.57736	0.238554	1	0
AFUN001078	16360833	16362146	1314	others	No	cDNA	AFUN001078	others	Translocon-associated protein subunit beta [Source:UniProtKB/TrEMBL;Acc:A0A182R4I6]	NA	No	AFUN001078	255.478	0.437844	0.171138	2.55843	0.0105146	1.97821	0.0283018	1.54819	x	AFUN001078	217.448	0.855668	0.671708	1.27387	0.20271	0.693125	0.776845	0.109665		AFUN001078	253.547	-0.2429	0.198582	-1.22317	0.221266	0.655085	1	0
AFUN001079	16359704	16360697	994	others	No	cDNA	AFUN001079	others	unspecified product	NA	No	AFUN001079	0.919225	-3.03752	2.47921	-1.2252	0.2205	0.656591	0.335189	0.474711		AFUN001079	2.17418	-1.36138	4.23893	-0.321162	0.748088	0.126047	1	0		AFUN001079	0.669566	-2.72135	3.68252	-0.738992	0.459912	0.337326	1	0
AFUN001080	16357655	16358208	554	others	No	cDNA	AFUN001080	others	unspecified product	NA	No	AFUN001080	0.429921	-1.62419	3.04847	-0.532789	0.59418	0.226082	1	0		AFUN001080	0.482674	-2.75089	5.85998	-0.469437	0.638757	0.194664	1	0		AFUN001080	0.180871	0.00706379	4.08048	0.00173112	0.998619	0.000600275	1	0
AFUN001081	16352629	16354733	2105	others	No	cDNA	AFUN001081	others	DUF4797 domain-containing protein [Source:UniProtKB/TrEMBL;Acc:A0A182R4I9]	NA	No	AFUN001081	57.2255	-1.94034	0.324905	-5.97201	2.34352e-09	8.63013	3.10273e-08	7.50826	x	AFUN001081	58.6741	-2.21421	0.954211	-2.32046	0.0203158	1.69217	0.241528	0.617033		AFUN001081	38.6433	-0.233074	0.381638	-0.610719	0.541386	0.266493	1	0
AFUN001082	16336877	16337782	906	others	No	cDNA	AFUN001082	others	unspecified product	NA	No	AFUN001082	2.13739	-1.43667	1.85493	-0.774515	0.438626	0.357905	0.562275	0.250051		AFUN001082	0.314105	2.05026	6.10794	0.335671	0.737119	0.132462	1	0		AFUN001082	1.86554	0.924771	2.3391	0.395353	0.692583	0.159528	1	0
AFUN001083	16317337	16318363	1027	others	No	cDNA	AFUN001083	others	unspecified product	NA	No	AFUN001083	0.835002	-2.05127	2.5955	-0.790318	0.429342	0.367197	0.554008	0.256484		AFUN001083	0.482674	-2.75089	5.85998	-0.469437	0.638757	0.194664	1	0		AFUN001083	0.513754	0.487959	4.08048	0.119584	0.904813	0.0434411	1	0
AFUN001084	16302787	16314596	11810	others	No	cDNA	AFUN001084	others	unspecified product	NA	No	AFUN001084	128.29	-0.125557	0.278582	-0.450699	0.652207	0.185615	0.747924	0.126143		AFUN001084	105.298	-0.373282	0.873121	-0.427526	0.668996	0.174576	0.981802	0.00797592		AFUN001084	113.394	0.0110105	0.411282	0.0267711	0.978642	0.00937603	1	0
AFUN001085	16285209	16301974	16766	others	No	cDNA	AFUN001085	others	unspecified product	NA	No	AFUN001085	876.145	0.124969	0.219563	0.569169	0.569241	0.244704	0.676401	0.169796		AFUN001085	666.665	0.48974	0.609824	0.803085	0.421926	0.374764	0.921417	0.0355437		AFUN001085	831.738	-0.0865847	0.273661	-0.316393	0.751704	0.123953	1	0
AFUN001086	16262555	16285219	22665	others	No	cDNA	AFUN001086	others	PH domain-containing protein [Source:UniProtKB/TrEMBL;Acc:A0A182R4J4]	NA	No	AFUN001086	2528.57	0.00793553	0.152501	0.052036	0.9585	0.0184079	0.972907	0.0119286		AFUN001086	1777.93	-0.109635	0.567473	-0.193199	0.846803	0.0722177	0.985614	0.00629311		AFUN001086	2264.22	0.170056	0.206268	0.824441	0.409689	0.387545	1	0
AFUN001087	16260322	16261856	1535	others	No	cDNA	AFUN001087	others	ATPase ASNA1 homolog [Source:UniProtKB/TrEMBL;Acc:A0A182R4J5]	NA	No	AFUN001087	326.333	0.496498	0.158361	3.13522	0.00171724	2.76517	0.00597686	2.22353	x	AFUN001087	246.098	0.248495	0.654739	0.379533	0.704292	0.152247	0.982577	0.00763328		AFUN001087	303.546	0.100336	0.185955	0.539573	0.589491	0.229523	1	0
AFUN001088	16257718	16260323	2606	others	No	cDNA	AFUN001088	others	glycine C-acetyltransferase [Source:Projected from Anopheles gambiae (AGAP005781) VB Community Annotation]	NA	No	AFUN001088	506.95	-0.484565	0.158496	-3.05727	0.00223365	2.65099	0.00752191	2.12367	x	AFUN001088	404.037	-0.667006	0.609314	-1.09468	0.273655	0.562796	0.845879	0.0726916		AFUN001088	432.547	0.0266119	0.186413	0.142758	0.886481	0.0523304	1	0
AFUN001091	16230909	16242656	11748	others	No	cDNA	AFUN001091	others	Acyl_transf_3 domain-containing protein [Source:UniProtKB/TrEMBL;Acc:A0A182R4J9]	NA	No	AFUN001091	170.61	0.00948867	0.248678	0.0381565	0.969563	0.013424	0.980705	0.00846176		AFUN001091	101.421	-0.209503	0.796424	-0.263055	0.792508	0.100996	0.985365	0.00640266		AFUN001091	149.69	0.448096	0.299355	1.49687	0.134427	0.871515	1	0
AFUN001092	16225123	16229111	3989	others	No	cDNA	AFUN001092	others	unspecified product	NA	No	AFUN001092	2.72286	-3.72212	1.34743	-2.7624	0.00573786	2.24125	0.0168855	1.77249	x	AFUN001092	2.41337	-5.07279	4.42143	-1.14732	0.25125	0.599894	1	0		AFUN001092	1.37565	0.93497	2.62837	0.355722	0.722049	0.141434	1	0
AFUN001096	16204807	16208851	4045	others	No	cDNA	AFUN001096	others	Acyl_transf_3 domain-containing protein [Source:UniProtKB/TrEMBL;Acc:A0A182R4K4]	NA	No	AFUN001096	24.8079	-0.191389	0.364754	-0.524705	0.599788	0.222002	0.702367	0.153436		AFUN001096	16.1872	-0.529766	1.58004	-0.335285	0.73741	0.132291	0.984947	0.00658717		AFUN001096	21.3083	0.413347	0.524509	0.788065	0.430658	0.365867	1	0
AFUN001097	16196520	16202156	5637	others	No	cDNA	AFUN001097	others	unspecified product	NA	No	AFUN001097	408.83	-2.44158	0.237514	-10.2797	8.69768e-25	24.0606	7.76283e-23	22.11	x	AFUN001097	278.071	-3.09892	0.701775	-4.41584	1.00621e-05	4.99731	0.000411809	3.3853	x	AFUN001097	274.162	0.695925	0.350097	1.98781	0.0468331	1.32945	1	0
AFUN001100	16131042	16169724	38683	others	No	cDNA	AFUN001100	others	hexosaminidase [Source:Projected from Anopheles gambiae (AGAP007080) VB Community Annotation]	NA	No	AFUN001100	817.851	0.574157	0.141683	4.0524	5.0695e-05	4.29503	0.000276212	3.55876	x	AFUN001100	617.73	0.489918	0.583449	0.839694	0.40108	0.396769	0.912653	0.0396943		AFUN001100	775.59	0.049899	0.169837	0.293806	0.768906	0.114127	1	0
AFUN001101	16138185	16155412	17228	others	No	cDNA	AFUN001101	others	unspecified product	NA	No	AFUN001101	27.0478	0.784702	0.340114	2.30717	0.0210452	1.67685	0.0505457	1.29632		AFUN001101	18.3388	0.298002	1.4828	0.200972	0.840721	0.0753482	0.985497	0.0063449		AFUN001101	24.9422	0.293204	0.423685	0.692032	0.488917	0.310765	1	0
AFUN001102	16129515	16130700	1186	others	No	cDNA	AFUN001102	others	NADH dehydrogenase (ubiquinone) Fe-S protein [Source:Projected from Anopheles gambiae (AGAP007082) VB Community Annotation]	NA	No	AFUN001102	1208.56	-0.683703	0.467981	-1.46096	0.144025	0.841561	0.241043	0.617905		AFUN001102	1210.04	-1.34064	0.567434	-2.36264	0.0181454	1.74123	0.225541	0.646775		AFUN001102	941.234	-0.048773	0.484328	-0.100702	0.919787	0.0363129	1	0
AFUN001103	16121065	16129456	8392	others	No	cDNA	AFUN001103	others	unspecified product	NA	No	AFUN001103	280.222	1.49121	0.250339	5.95674	2.57317e-09	8.58953	3.37874e-08	7.47124	x	AFUN001103	162.244	1.20465	0.736043	1.63665	0.101703	0.992667	0.617046	0.209682		AFUN001103	267.087	0.453294	0.310322	1.46072	0.144092	0.84136	1	0
AFUN001104	16119208	16120880	1673	others	No	cDNA	AFUN001104	others	unspecified product	NA	No	AFUN001104	3.53499	0.417534	1.33135	0.313618	0.753811	0.122737	0.827152	0.0824149		AFUN001104	2.24802	0.85166	3.86316	0.220457	0.825516	0.0832748	1	0		AFUN001104	3.36006	0.204673	1.63279	0.125352	0.900245	0.0456393	1	0
AFUN001105	16112590	16116293	3704	others	No	cDNA	AFUN001105	others	TMEM135_C_rich domain-containing protein [Source:UniProtKB/TrEMBL;Acc:A0A182R4L3]	NA	No	AFUN001105	301.108	0.0150361	0.164685	0.0913017	0.927253	0.0328018	0.952477	0.0211455		AFUN001105	246.023	0.184878	0.705049	0.26222	0.793152	0.100644	0.985365	0.00640266		AFUN001105	281.261	-0.13257	0.272859	-0.485853	0.627071	0.202683	1	0
AFUN001107	48161670	48168983	7314	others	No	cDNA	AFUN001107	others	THAP-type domain-containing protein [Source:UniProtKB/TrEMBL;Acc:A0A182R4L5]	NA	No	AFUN001107	663.468	0.723761	0.179105	4.04098	5.32283e-05	4.27386	0.00028701	3.5421	x	AFUN001107	397.904	0.191713	0.609872	0.314349	0.753256	0.123058	0.985365	0.00640266		AFUN001107	599.879	0.502954	0.213847	2.35193	0.0186763	1.72871	1	0
AFUN001108	48168988	48169871	884	others	No	cDNA	AFUN001108	others	unspecified product	NA	No	AFUN001108	38.9727	0.416881	0.413156	1.00902	0.312966	0.504502	0.437406	0.359116		AFUN001108	38.6508	0.99233	1.19415	0.830989	0.40598	0.391496	0.914252	0.0389342		AFUN001108	40.2473	-0.485227	0.565416	-0.858177	0.390795	0.408051	1	0
AFUN001112	48227593	48229881	2289	others	No	cDNA	AFUN001112	others	hexamerin [Source:Projected from Anopheles gambiae (AGAP001345) VB Community Annotation]	NA	No	AFUN001112	39.2141	0.22092	0.769068	0.287257	0.773916	0.111306	0.840984	0.0752123		AFUN001112	31.5083	0.750204	1.207	0.621544	0.534241	0.272262	0.953929	0.0204837		AFUN001112	38.2473	-0.205582	0.89193	-0.230491	0.81771	0.0874007	1	0
AFUN001114	48251583	48253063	1481	others	No	cDNA	AFUN001114	others	unspecified product	NA	No	AFUN001114	137.188	1.02832	0.46509	2.21102	0.0270348	1.56808	0.0620572	1.20721		AFUN001114	154.292	1.25359	0.753208	1.66433	0.0960457	1.01752	0.607841	0.21621		AFUN001114	148.418	-0.58911	0.53412	-1.10296	0.270047	0.568561	1	0
AFUN001115	48254423	48256204	1782	others	No	cDNA	AFUN001115	others	unspecified product	NA	No	AFUN001115	139.705	0.00292661	0.22304	0.0131215	0.989531	0.00457065	0.993814	0.00269509		AFUN001115	98.8236	-0.324019	0.842819	-0.384447	0.700647	0.154501	0.982577	0.00763328		AFUN001115	122.665	0.22411	0.324164	0.691346	0.489348	0.310382	1	0
AFUN001116	48256340	48260854	4515	others	No	cDNA	AFUN001116	others	unspecified product	NA	No	AFUN001116	7.47282	-0.910411	0.790579	-1.15157	0.249496	0.602936	0.369404	0.432498		AFUN001116	5.21361	-3.76726	2.9216	-1.28945	0.197242	0.705001	0.772246	0.112244		AFUN001116	4.7259	2.05192	1.42025	1.44476	0.148525	0.828201	1	0
AFUN001120	48315181	48318690	3510	others	No	cDNA	AFUN001120	others	Ras-related protein R-Ras2 [Source:Projected from Anopheles gambiae (AGAP002812) VB Community Annotation]	NA	No	AFUN001120	608.587	0.257655	0.135931	1.89549	0.0580276	1.23637	0.116137	0.935029		AFUN001120	572.999	0.350028	0.587115	0.596182	0.551054	0.258806	0.955383	0.0198227		AFUN001120	588.439	-0.318694	0.13329	-2.39097	0.0168038	1.77459	1	0
AFUN001121	48318836	48321551	2716	IMPs	Yes	cDNA	AFUN001121	others	CLIP-domain serine protease [Source:Projected from Anopheles gambiae (AGAP002811) UniProtKB/TrEMBL;Acc:A0A1S4GG73]	NA	No	AFUN001121	58.0493	-1.14335	0.307915	-3.7132	0.000204656	3.68898	0.000940931	3.02644	x	AFUN001121	40.3229	-2.00693	1.13491	-1.76836	0.0770003	1.11351	0.549815	0.259783		AFUN001121	42.7538	0.63418	0.469926	1.34953	0.177167	0.751618	1	0
AFUN001122	48323002	48324559	1558	others	No	cDNA	AFUN001122	others	45 kDa calcium-binding protein [Source:Projected from Anopheles gambiae (AGAP002810) VB Community Annotation]	NA	No	AFUN001122	30.7453	0.108853	0.59009	0.184468	0.853646	0.0687221	0.901762	0.0449081		AFUN001122	26.6535	-0.197757	1.36466	-0.144913	0.884779	0.053165	0.990097	0.00432229		AFUN001122	27.8544	-0.0533522	0.763056	-0.0699191	0.944258	0.0249093	1	0
AFUN001123	48324802	48325907	1106	others	No	cDNA	AFUN001123	others	unspecified product	NA	No	AFUN001123	51.888	-0.938284	0.246885	-3.80049	0.000144407	3.84041	0.000693145	3.15918	x	AFUN001123	32.6016	-1.13016	1.28222	-0.881413	0.378094	0.4224	0.89755	0.0469412		AFUN001123	41.9846	0.34338	0.461882	0.743435	0.457218	0.339877	1	0
AFUN001124	48325854	48327585	1732	others	No	cDNA	AFUN001124	others	3-oxoacyl-(acyl-carrier-protein) synthase II [Source:Projected from Anopheles gambiae (AGAP002809) VB Community Annotation]	NA	No	AFUN001124	69.6008	-0.443767	0.287003	-1.54621	0.122054	0.913447	0.211568	0.674549		AFUN001124	59.1593	-0.655313	0.939208	-0.69773	0.485346	0.313948	0.937034	0.0282445		AFUN001124	59.6197	-0.0529761	0.348469	-0.152025	0.879167	0.0559286	1	0
AFUN001125	48327978	48329034	1057	others	No	cDNA	AFUN001125	others	rRNA small subunit pseudouridine methyltransferase Nep1 [Source:Projected from Anopheles gambiae (AGAP002808) VB Community Annotation]	NA	No	AFUN001125	127.164	0.872396	0.253063	3.44734	0.00056613	3.24708	0.00228945	2.64027	x	AFUN001125	81.6942	0.489209	0.854839	0.572282	0.567131	0.246317	0.961835	0.0168995		AFUN001125	118.167	0.346323	0.310551	1.11519	0.264771	0.57713	1	0
AFUN001128	48355541	48359206	3666	others	No	cDNA	AFUN001128	others	DNA excision repair protein ERCC-4 [Source:Projected from Anopheles gambiae (AGAP002805) VB Community Annotation]	NA	No	AFUN001128	123.607	0.307379	0.195625	1.57127	0.11612	0.935093	0.203284	0.691896		AFUN001128	70.9558	-0.150089	0.888045	-0.16901	0.865789	0.0625881	0.988212	0.00514969		AFUN001128	108.654	0.562868	0.255839	2.20009	0.0278008	1.55594	1	0
AFUN001129	48404249	48405124	876	others	No	cDNA	AFUN001129	others	Ecdysteroid-regulated protein [Source:Projected from Anopheles gambiae (AGAP002804) VB Community Annotation]	NA	No	AFUN001129	196.619	-1.6522	0.518796	-3.18467	0.00144919	2.83888	0.00517081	2.28644	x	AFUN001129	186.362	-1.5195	0.768446	-1.97737	0.0480002	1.31876	0.422102	0.374583		AFUN001129	149.685	-0.379213	0.638006	-0.594373	0.552263	0.257854	1	0
AFUN001131	48470599	48475330	4732	others	No	cDNA	AFUN001131	others	unspecified product	NA	No	AFUN001131	1.41555	-0.32327	1.62162	-0.19935	0.841989	0.0746936	0.892847	0.049223		AFUN001131	1.11088	-0.585229	5.69383	-0.102783	0.918135	0.0370934	1	0		AFUN001131	1.21412	-0.00620432	2.25933	-0.00274609	0.997809	0.000952609	1	0
AFUN001133	64349369	64350367	999	others	No	cDNA	AFUN001133	others	Short-chain dehydrogenease/reductase [Source:Projected from Anopheles gambiae (AGAP011852) VB Community Annotation]	NA	No	AFUN001133	256.221	0.997532	0.257217	3.87818	0.000105242	3.97781	0.000525101	3.27976	x	AFUN001133	218.564	1.06171	0.670258	1.58404	0.113185	0.946211	0.64726	0.188921		AFUN001133	257.964	-0.160576	0.296548	-0.541484	0.588174	0.230494	1	0
AFUN001134	64322309	64323486	1178	others	No	cDNA	AFUN001134	others	unspecified product	NA	No	AFUN001134	351.793	0.734345	0.33357	2.20148	0.0277023	1.55748	0.0633628	1.19817		AFUN001134	286.973	0.442846	0.653481	0.677672	0.497979	0.302789	0.941911	0.0259902		AFUN001134	335.885	-0.0114521	0.384216	-0.0298064	0.976221	0.0104517	1	0
AFUN001136	64307943	64308892	950	others	No	cDNA	AFUN001136	others	unspecified product	NA	No	AFUN001136	22.2219	-0.21124	0.4395	-0.480638	0.630774	0.200126	0.72935	0.137064		AFUN001136	15.0067	-0.0434323	1.67977	-0.0258561	0.979372	0.00905227	0.997719	0.000991579		AFUN001136	19.9689	0.177873	0.626249	0.284028	0.776389	0.109921	1	0
AFUN001137	64252044	64307833	55790	others	No	cDNA	AFUN001137	others	platelet-activating factor acetylhydrolase IB subunit alpha [Source:Projected from Anopheles gambiae (AGAP011849) VB Community Annotation]	NA	No	AFUN001137	3523.32	-0.46948	0.113641	-4.13126	3.60776e-05	4.44276	0.000204467	3.68938	x	AFUN001137	2890.24	-0.494915	0.552282	-0.896127	0.370185	0.431581	0.893101	0.0490993		AFUN001137	3069.77	-0.0803606	0.153482	-0.523584	0.600568	0.221438	1	0
AFUN001139	183435	192452	9018	others	No	cDNA	AFUN001139	others	unspecified product	NA	No	AFUN001139	781.82	-0.516056	0.265089	-1.94672	0.0515679	1.28762	0.10555	0.976544		AFUN001139	588.23	-1.02242	0.586951	-1.74192	0.0815218	1.08873	0.568282	0.245436		AFUN001139	640	0.266511	0.302339	0.881496	0.37805	0.422451	1	0
AFUN001142	170160	174860	4701	others	No	cDNA	AFUN001142	others	unspecified product	NA	No	AFUN001142	897.036	0.668426	0.138286	4.83365	1.34056e-06	5.87272	1.06734e-05	4.9717	x	AFUN001142	733.434	0.799905	0.576514	1.38749	0.165294	0.781744	0.736268	0.132964		AFUN001142	880.732	-0.116765	0.167024	-0.699093	0.484494	0.314711	1	0
AFUN001143	167929	169012	1084	others	No	cDNA	AFUN001143	others	NADH dehydrogenase (ubiquinone) 1 beta subcomplex [Source:Projected from Anopheles gambiae (AGAP007574) VB Community Annotation]	NA	No	AFUN001143	586.51	-1.79405	0.500682	-3.58321	0.000339404	3.46928	0.00147642	2.83079	x	AFUN001143	695.742	-2.30087	0.589368	-3.90397	9.46294e-05	4.02397	0.00307899	2.51159	x	AFUN001143	376.829	-0.282397	0.511298	-0.552314	0.580733	0.236023	1	0
AFUN001144	150352	167602	17251	others	No	cDNA	AFUN001144	others	RAD54-like protein [Source:Projected from Anopheles gambiae (AGAP007573) VB Community Annotation]	NA	No	AFUN001144	5074.04	0.527759	0.135236	3.90251	9.5202e-05	4.02135	0.000479883	3.31886	x	AFUN001144	3938.98	0.700708	0.5478	1.27913	0.200851	0.697127	0.776395	0.109917		AFUN001144	4906.17	-0.054851	0.170318	-0.32205	0.747415	0.126438	1	0
AFUN001146	144679	146036	1358	others	No	cDNA	AFUN001146	others	unspecified product	NA	No	AFUN001146	176.606	1.30982	0.221878	5.90331	3.56283e-09	8.44821	4.57009e-08	7.34008	x	AFUN001146	154.294	1.36287	0.725824	1.87768	0.0604245	1.21879	0.485286	0.314002		AFUN001146	181.988	-0.188379	0.255099	-0.738453	0.460239	0.337017	1	0
AFUN001147	144218	144666	449	others	No	cDNA	AFUN001147	others	unspecified product	NA	No	AFUN001147	38.7132	1.18808	0.330859	3.59089	0.000329555	3.48207	0.00143701	2.84254	x	AFUN001147	27.6979	1.3308	1.26775	1.04973	0.293841	0.531888	0.857797	0.0666153		AFUN001147	38.3697	0.0944695	0.383611	0.246264	0.805478	0.0939464	1	0
AFUN001148	126237	141855	15619	others	No	cDNA	AFUN001148	others	membrane bound O-acyltransferase domain containing 2a [Source:Projected from Anopheles gambiae (AGAP007567) VB Community Annotation]	NA	No	AFUN001148	2253.82	0.0826397	0.13796	0.599013	0.549164	0.260298	0.659173	0.181001		AFUN001148	1907.42	0.480666	0.548611	0.876151	0.380948	0.419134	0.898278	0.0465893		AFUN001148	2170.26	-0.252691	0.156538	-1.61425	0.106474	0.972756	1	0
AFUN001149	124395	125341	947	others	No	cDNA	AFUN001149	others	DNA-repair protein complementing XP-A cells [Source:Projected from Anopheles gambiae (AGAP007566) VB Community Annotation]	NA	No	AFUN001149	141.118	0.606381	0.171011	3.54587	0.00039132	3.40747	0.00166595	2.77834	x	AFUN001149	117.058	0.635813	0.77198	0.823614	0.410159	0.387048	0.916699	0.0377731		AFUN001149	137.201	-0.107549	0.211497	-0.508516	0.611092	0.213894	1	0
AFUN001150	121669	124370	2702	others	No	cDNA	AFUN001150	others	chaperone DnaJ protein [Source:Projected from Anopheles gambiae (AGAP007565) VB Community Annotation]	NA	No	AFUN001150	772.035	-0.307218	0.212543	-1.44544	0.148334	0.82876	0.246284	0.608564		AFUN001150	697.527	-0.159318	0.597472	-0.266653	0.789736	0.102518	0.985365	0.00640266		AFUN001150	703.808	-0.286883	0.266605	-1.07606	0.2819	0.549904	1	0
AFUN001151	117636	121438	3803	others	No	cDNA	AFUN001151	others	cullin [Source:Projected from Anopheles gambiae (AGAP007727) VB Community Annotation]	NA	No	AFUN001151	1565.37	-0.289625	0.152103	-1.90414	0.0568926	1.24494	0.114206	0.942312		AFUN001151	1417.78	0.191114	0.565381	0.338026	0.735344	0.13351	0.984947	0.00658717		AFUN001151	1481.94	-0.397612	0.197179	-2.0165	0.0437477	1.35904	1	0
AFUN001152	114465	117022	2558	others	No	cDNA	AFUN001152	others	mitochondrial intermediate peptidase [Source:Projected from Anopheles gambiae (AGAP007728) VB Community Annotation]	NA	No	AFUN001152	424.434	0.0743437	0.178027	0.417597	0.676242	0.169898	0.767257	0.115059		AFUN001152	386.116	0.152568	0.644708	0.236646	0.812931	0.0899461	0.985365	0.00640266		AFUN001152	400.555	-0.261365	0.246742	-1.05926	0.28948	0.538381	1	0
AFUN001153	110428	114382	3955	others	No	cDNA	AFUN001153	others	activin receptor type-1 [Source:Projected from Anopheles gambiae (AGAP007729) VB Community Annotation]	NA	No	AFUN001153	824.427	-0.12408	0.124689	-0.995111	0.319682	0.495281	0.444505	0.352124		AFUN001153	693.435	-0.190887	0.577328	-0.330638	0.740918	0.13023	0.984947	0.00658717		AFUN001153	744.023	-0.102746	0.133729	-0.76831	0.442303	0.35428	1	0
AFUN001154	105800	109655	3856	others	No	cDNA	AFUN001154	others	unspecified product	NA	No	AFUN001154	308.582	-0.167987	0.182833	-0.918797	0.358202	0.445872	0.481691	0.317232		AFUN001154	239.44	0.0279254	0.711086	0.0392715	0.968674	0.0138224	0.996476	0.0015331		AFUN001154	282.466	-0.071714	0.289566	-0.24766	0.804397	0.0945294	1	0
AFUN001155	101372	103681	2310	others	No	cDNA	AFUN001155	others	Mic1 domain-containing protein [Source:UniProtKB/TrEMBL;Acc:A0A182R4R3]	NA	No	AFUN001155	276.448	0.476983	0.168473	2.8312	0.00463731	2.33373	0.0141188	1.8502	x	AFUN001155	217.463	0.510002	0.677953	0.752267	0.45189	0.344967	0.926952	0.0329425		AFUN001155	264.07	-0.0345998	0.217178	-0.159315	0.873421	0.0587766	1	0
AFUN001156	95019	99476	4458	others	No	cDNA	AFUN001156	others	vacuolar protein sorting [Source:Projected from Anopheles gambiae (AGAP007578) VB Community Annotation]	NA	No	AFUN001156	815.241	-0.154391	0.134411	-1.14865	0.250701	0.600844	0.370593	0.431103		AFUN001156	653.854	-0.0287625	0.582737	-0.0493575	0.960634	0.0174419	0.995906	0.00178163		AFUN001156	744.562	-0.101007	0.168934	-0.59791	0.5499	0.259716	1	0
AFUN001157	92591	93743	1153	others	No	cDNA	RpL18	others	60S ribosomal protein L18 [Source:UniProtKB/TrEMBL;Acc:A0A182R4R5]	RpL18	No	AFUN001157	5416.31	-0.329264	0.190891	-1.72488	0.0845487	1.07289	0.157601	0.802441		AFUN001157	4250.98	-0.369665	0.541572	-0.682578	0.494874	0.305506	0.941598	0.0261347		AFUN001157	4770.62	-0.0119179	0.227692	-0.0523423	0.958256	0.0185185	1	0
AFUN001158	36197342	36198030	689	others	No	cDNA	AFUN001158	others	C-type lectin domain-containing protein [Source:UniProtKB/TrEMBL;Acc:A0A182R4R6]	NA	No	AFUN001158	0.437481	-2.7072	3.39525	-0.797347	0.42525	0.371356	1	0		AFUN001158	0.241337	-1.75094	5.94809	-0.294371	0.768474	0.114371	1	0		AFUN001158	0.273284	0	4.08048	0	1	0	1	0
AFUN001159	36136000	36183741	47742	others	No	cDNA	AFUN001159	others	Control protein HCTL029 [Source:Projected from Anopheles gambiae (AGAP002909) VB Community Annotation]	NA	No	AFUN001159	15.385	0.847863	0.559741	1.51474	0.129838	0.886599	0.222402	0.652861		AFUN001159	17.7439	1.20563	1.62848	0.740343	0.459092	0.3381	0.929217	0.031883		AFUN001159	16.7141	-0.632141	0.728708	-0.867482	0.385678	0.413775	1	0
AFUN001160	36124158	36129209	5052	others	No	cDNA	AFUN001160	others	splicing factor U2AF 65 kDa subunit [Source:Projected from Anopheles gambiae (AGAP002908) VB Community Annotation]	NA	No	AFUN001160	295.437	0.231726	0.239035	0.969421	0.332335	0.478423	0.457704	0.339415		AFUN001160	243.129	0.334721	0.655493	0.510639	0.609604	0.214952	0.969848	0.0132962		AFUN001160	279.812	-0.124984	0.282037	-0.443147	0.65766	0.181999	1	0
AFUN001161	36122341	36123359	1019	others	No	cDNA	AFUN001161	others	unspecified product	NA	No	AFUN001161	0.708246	-0.729896	2.87579	-0.253807	0.799645	0.097103	0.861109	0.0649418		AFUN001161	0.724011	-3.33582	5.83031	-0.572152	0.567219	0.246249	1	0		AFUN001161	0.323555	0.998064	4.07371	0.245001	0.806456	0.0934195	1	0
AFUN001165	85357363	85402258	44896	others	No	cDNA	AFUN001165	others	BTB domain-containing protein [Source:UniProtKB/TrEMBL;Acc:A0A182R4S3]	NA	No	AFUN001165	70.0239	-0.68549	0.469139	-1.46117	0.14397	0.841728	0.240982	0.618015		AFUN001165	60.0258	0.233959	0.965153	0.242406	0.808465	0.0923385	0.985365	0.00640266		AFUN001165	66.1125	-0.489615	0.55874	-0.876283	0.380876	0.419216	1	0
AFUN001166	85407999	85410616	2618	others	No	cDNA	AFUN001166	others	unspecified product	NA	No	AFUN001166	51.1795	-1.54505	0.257412	-6.00223	1.94623e-09	8.71081	2.60921e-08	7.58349	x	AFUN001166	32.1421	-1.82245	1.18453	-1.53855	0.123915	0.906877	0.670578	0.173551		AFUN001166	38.8372	0.479824	0.398387	1.20442	0.228429	0.64125	1	0
AFUN001167	78484616	78488313	3698	others	No	cDNA	AFUN001167	others	unspecified product	NA	No	AFUN001167	4.26493	-0.682213	1.27135	-0.536606	0.59154	0.228016	0.69526	0.157853		AFUN001167	3.18819	-0.717612	3.24331	-0.221259	0.824891	0.0836035	0.985365	0.00640266		AFUN001167	3.60279	0.0146883	1.6177	0.00907976	0.992755	0.0031577	1	0
AFUN001169	29860708	29861942	1235	others	No	cDNA	AFUN001169	others	unspecified product	NA	No	AFUN001169	1388.1	0.549923	0.372508	1.47627	0.139872	0.85427	0.235388	0.628216		AFUN001169	1211.22	0.786402	0.559108	1.40653	0.159567	0.797056	0.727562	0.13813		AFUN001169	1376.55	-0.236959	0.431987	-0.548534	0.583326	0.234089	1	0
AFUN001170	13201747	13204189	2443	others	No	cDNA	AFUN001170	others	unspecified product	NA	No	AFUN001170	0.499281	-2.90181	3.38731	-0.856671	0.391627	0.407127	1	0		AFUN001170	0	NA	NA	NA	NA	#VALUE!	1	0		AFUN001170	0.409926	0	4.08048	0	1	0	1	0
AFUN001171	13150191	13193023	42833	others	No	cDNA	AFUN001171	others	Arrestin_C domain-containing protein [Source:UniProtKB/TrEMBL;Acc:A0A182R4S9]	NA	No	AFUN001171	407.589	-0.33136	0.169721	-1.95239	0.0508924	1.29335	0.104391	0.981338		AFUN001171	326.266	-0.260207	0.642965	-0.404698	0.685699	0.163866	0.982577	0.00763328		AFUN001171	363.646	-0.0786887	0.230362	-0.341588	0.732661	0.135097	1	0
AFUN001172	13147890	13148658	769	others	No	cDNA	AFUN001172	others	14 kDa phosphohistidine phosphatase [Source:Projected from Anopheles gambiae (AGAP002078) VB Community Annotation]	NA	No	AFUN001172	64.3263	-0.642535	0.256821	-2.50188	0.0123536	1.9082	0.0323756	1.48978	x	AFUN001172	34.5871	-1.47463	1.18838	-1.24087	0.214655	0.66826	0.794258	0.100038		AFUN001172	50.849	0.984195	0.417461	2.35758	0.0183947	1.73531	1	0
AFUN001173	13146274	13147775	1502	others	No	cDNA	AFUN001173	others	tRNA pseudouridine synthase [Source:Projected from Anopheles gambiae (AGAP002077) VB Community Annotation]	NA	No	AFUN001173	175.888	0.564798	0.16951	3.33195	0.000862388	3.0643	0.00330035	2.48144	x	AFUN001173	132.74	0.936407	0.748772	1.25059	0.211084	0.675545	0.788487	0.103205		AFUN001173	171.992	-0.0621967	0.183581	-0.338797	0.734763	0.133853	1	0
AFUN001177	13113432	13118840	5409	others	No	cDNA	AFUN001177	others	glycerol kinase [Source:Projected from Anopheles gambiae (AGAP001563) VB Community Annotation]	NA	No	AFUN001177	671.386	0.13992	0.170398	0.821133	0.41157	0.385556	0.536281	0.270608		AFUN001177	417.353	-0.449171	0.626938	-0.716452	0.473713	0.324485	0.931719	0.0307149		AFUN001177	578.974	0.515305	0.232292	2.21835	0.026531	1.57625	1	0
AFUN001178	13104623	13113008	8386	others	No	cDNA	AFUN001178	others	G_PROTEIN_RECEP_F2_4 domain-containing protein [Source:UniProtKB/TrEMBL;Acc:A0A182R4T6]	NA	No	AFUN001178	122.728	-1.17337	0.293218	-4.0017	6.28903e-05	4.20142	0.000332093	3.47874	x	AFUN001178	91.948	-1.32951	0.823092	-1.61526	0.106255	0.973651	0.628059	0.201999		AFUN001178	97.0123	0.130184	0.373122	0.348906	0.72716	0.13837	1	0
AFUN001179	13085495	13103024	17530	others	No	cDNA	AFUN001179	others	G_PROTEIN_RECEP_F1_2 domain-containing protein [Source:UniProtKB/TrEMBL;Acc:A0A182R4T7]	NA	No	AFUN001179	37.5088	-0.922323	0.354209	-2.6039	0.00921702	2.03541	0.0252657	1.59747	x	AFUN001179	30.7509	-1.16559	1.27351	-0.915253	0.360059	0.443626	0.888523	0.0513313		AFUN001179	30.2269	0.0642694	0.547415	0.117405	0.906539	0.0426135	1	0
AFUN001180	13075298	13076540	1243	others	No	cDNA	AFUN001180	others	homeobox protein GSH [Source:Projected from Anopheles gambiae (AGAP001560) VB Community Annotation]	NA	No	AFUN001180	1.88124	-4.81373	1.76614	-2.72557	0.00641903	2.19253	0.0185395	1.7319	x	AFUN001180	0.724011	-3.33582	5.83031	-0.572152	0.567219	0.246249	1	0		AFUN001180	1.28547	0	3.61055	0	1	0	1	0
AFUN001181	13058182	13062497	4316	others	No	cDNA	AFUN001181	others	RNA polymerase-associated protein CTR9 [Source:Projected from Anopheles gambiae (AGAP001559) VB Community Annotation]	NA	No	AFUN001181	259.424	1.39185	0.182731	7.61697	2.59704e-14	13.5855	7.30089e-13	12.1366	x	AFUN001181	191.929	1.11749	0.689703	1.62024	0.10518	0.978068	0.626492	0.203084		AFUN001181	255.625	0.101123	0.207594	0.487118	0.626175	0.203304	1	0
AFUN001182	13053465	13058098	4634	others	No	cDNA	AFUN001182	others	G_PROTEIN_RECEP_F1_2 domain-containing protein [Source:UniProtKB/TrEMBL;Acc:A0A182R4U0]	NA	No	AFUN001182	2.91989	2.37819	1.39768	1.70153	0.0888427	1.05138	0.164	0.785155		AFUN001182	4.35371	5.60069	3.95638	1.41561	0.156889	0.804406	0.720698	0.142247		AFUN001182	3.94597	-1.04236	1.52042	-0.685576	0.49298	0.30717	1	0
AFUN001185	12958648	12992427	33780	others	No	cDNA	AFUN001185	others	solute carrier family 12 (sodium/potassium/chloride transporter), member [Source:Projected from Anopheles gambiae (AGAP001557) VB Community Annotation]	NA	No	AFUN001185	929.384	-0.377442	0.148387	-2.54363	0.0109707	1.95976	0.029305	1.53306	x	AFUN001185	713.451	-0.318603	0.594383	-0.536022	0.591943	0.22772	0.964484	0.0157051		AFUN001185	821.623	-0.0161357	0.207141	-0.0778971	0.93791	0.0278389	1	0
AFUN001186	12944578	12952905	8328	others	No	cDNA	AFUN001186	others	unspecified product	NA	No	AFUN001186	224.902	0.727492	0.190976	3.80934	0.000139339	3.85593	0.0006721	3.17257	x	AFUN001186	132.073	0.78405	0.759568	1.03223	0.301964	0.520045	0.861308	0.0648418		AFUN001186	210.472	0.388734	0.211193	1.84066	0.065672	1.18262	1	0
AFUN001187	12946820	12949267	2448	others	No	cDNA	AFUN001187	others	Odorant binding protein 7 [Source:UniProtKB/TrEMBL;Acc:E5FD93]	NA	No	AFUN001187	53.7237	-1.28086	0.379869	-3.37186	0.000746627	3.1269	0.00291146	2.53589	x	AFUN001187	52.7307	0.0445042	1.09564	0.0406195	0.967599	0.0143045	0.996277	0.00161989		AFUN001187	50.6591	-0.912557	0.549836	-1.65969	0.096977	1.01333	1	0
AFUN001188	12941559	12944293	2735	others	No	cDNA	AFUN001188	others	unspecified product	NA	No	AFUN001188	149.931	0.456007	0.241835	1.88561	0.0593473	1.2266	0.118112	0.927708		AFUN001188	126.422	1.08225	0.76004	1.42394	0.154465	0.81117	0.715276	0.145527		AFUN001188	150.838	-0.267724	0.267677	-1.00018	0.317226	0.498632	1	0
AFUN001189	12939712	12941395	1684	others	No	cDNA	AFUN001189	others	unspecified product	NA	No	AFUN001189	324.798	0.163568	0.13945	1.17296	0.240813	0.618319	0.359096	0.44479		AFUN001189	273.531	0.480863	0.64354	0.747216	0.454933	0.342052	0.928487	0.032224		AFUN001189	312.526	-0.221059	0.167999	-1.31583	0.18823	0.725311	1	0
AFUN001190	12928885	12939304	10420	others	No	cDNA	AFUN001190	others	unspecified product	NA	No	AFUN001190	117.875	-0.169134	0.260258	-0.64987	0.515776	0.287539	0.631025	0.199954		AFUN001190	78.3303	-0.215115	0.872053	-0.246677	0.805158	0.0941188	0.985365	0.00640266		AFUN001190	104.176	0.23872	0.333758	0.715248	0.474456	0.323804	1	0
AFUN001191	12920345	12923193	2849	IMPs	Yes	cDNA	AFUN001191	others	Fibrinogen C-terminal domain-containing protein [Source:UniProtKB/TrEMBL;Acc:A0A182R4U9]	NA	No	AFUN001191	35.7201	-1.48722	0.503491	-2.95381	0.00313875	2.50324	0.0101663	1.99284	x	AFUN001191	28.3289	-1.73256	1.27302	-1.36099	0.173518	0.760656	0.746285	0.127095		AFUN001191	26.8606	0.118297	0.673384	0.175675	0.860549	0.0652243	1	0
AFUN001196	12893472	12897846	4375	others	No	cDNA	AFUN001196	others	sodium-coupled monocarboxylate transporter [Source:Projected from Anopheles gambiae (AGAP001550) VB Community Annotation]	NA	No	AFUN001196	160.349	-0.552062	0.292949	-1.8845	0.0594979	1.2255	0.118356	0.92681		AFUN001196	148.41	-0.496164	0.741461	-0.66917	0.503387	0.298098	0.944933	0.0245991		AFUN001196	140.762	-0.283258	0.357494	-0.792344	0.42816	0.368394	1	0
AFUN001197	12888818	12892151	3334	others	No	cDNA	AFUN001197	others	unspecified product	NA	No	AFUN001197	703.115	0.291008	0.151596	1.91963	0.0549044	1.26039	0.110912	0.95502		AFUN001197	482.031	-0.00294183	0.612619	-0.00480206	0.996169	0.00166718	0.999499	0.000217778		AFUN001197	633.974	0.25546	0.206741	1.23565	0.216588	0.664366	1	0
AFUN001198	12887818	12888507	690	others	No	cDNA	RpS23	others	40S ribosomal protein S23 [Source:UniProtKB/TrEMBL;Acc:A0A182R4V6]	RpS23	No	AFUN001198	7285.27	0.0909486	0.146039	0.622771	0.533435	0.272918	0.64582	0.189889		AFUN001198	5239.66	-0.163858	0.537261	-0.304988	0.760375	0.118972	0.985365	0.00640266		AFUN001198	6504.84	0.184554	0.171843	1.07397	0.282836	0.548465	1	0
AFUN001199	12884598	12886762	2165	others	No	cDNA	AFUN001199	others	Stress-associated endoplasmic reticulum protein [Source:Projected from Anopheles gambiae (AGAP001548) VB Community Annotation]	NA	No	AFUN001199	4148.29	-0.326342	0.219512	-1.48667	0.137102	0.862955	0.231982	0.634546		AFUN001199	3225.35	0.210814	0.541832	0.389075	0.69722	0.15663	0.982577	0.00763328		AFUN001199	3859.57	-0.19815	0.234929	-0.843447	0.398979	0.39905	1	0
AFUN001201	12876023	12879968	3946	others	No	cDNA	AFUN001201	others	tripartite motif-containing protein [Source:Projected from Anopheles gambiae (AGAP001544) VB Community Annotation]	NA	No	AFUN001201	452.546	1.25862	0.268751	4.6832	2.82429e-06	5.54909	2.07401e-05	4.68319	x	AFUN001201	304.329	1.8559	0.640315	2.89841	0.00375063	2.4259	0.0703752	1.15258		AFUN001201	453.436	0.109084	0.242714	0.449434	0.653119	0.185008	1	0
AFUN001202	12863435	12865107	1673	others	No	cDNA	AFUN001202	others	DM5 domain-containing protein [Source:UniProtKB/TrEMBL;Acc:A0A182R4W0]	NA	No	AFUN001202	2.94525	-4.9038	1.31727	-3.72268	0.000197116	3.70528	0.000912834	3.03961	x	AFUN001202	3.76666	-2.24701	3.03723	-0.739823	0.459408	0.337802	0.929217	0.031883		AFUN001202	1.86739	-2.96072	1.85004	-1.60036	0.10952	0.960507	1	0
AFUN001203	12860024	12862516	2493	CPs	Yes	cDNA	AFUN001203	others	cuticular protein TWDL family [Source:Projected from Anopheles gambiae (AGAP013269) VB Community Annotation]	NA	No	AFUN001203	3.83015	-2.372	1.59983	-1.48266	0.138164	0.859605	0.233283	0.632117		AFUN001203	2.17203	-4.92078	4.62957	-1.0629	0.287827	0.540869	1	0		AFUN001203	2.37339	2.52056	2.81759	0.894578	0.371013	0.430611	1	0
AFUN001204	12839551	12851738	12188	others	No	cDNA	AFUN001204	others	unspecified product	NA	No	AFUN001204	94.6615	0.882478	0.244642	3.60722	0.000309494	3.50935	0.00135995	2.86648	x	AFUN001204	102.448	0.891166	0.814722	1.09383	0.274031	0.562201	0.845879	0.0726916		AFUN001204	98.6885	-0.480594	0.247477	-1.94197	0.0521404	1.28283	1	0
AFUN001205	12819903	12823324	3422	others	No	cDNA	AFUN001205	others	unspecified product	NA	No	AFUN001205	85.4568	-0.875691	0.214382	-4.08473	4.41282e-05	4.35528	0.00024413	3.61238	x	AFUN001205	75.8156	0.0161067	0.868872	0.0185374	0.98521	0.00647114	0.998816	0.000514665		AFUN001205	79.2407	-0.569777	0.249732	-2.28155	0.022516	1.64751	1	0
AFUN001206	12817220	12819512	2293	others	No	cDNA	AFUN001206	others	Histone acetyltransferase [Source:UniProtKB/TrEMBL;Acc:A0A182R4W4]	NA	No	AFUN001206	234.856	-0.0421185	0.25957	-0.162262	0.871099	0.0599324	0.91392	0.0390917		AFUN001206	155.092	0.375491	0.735317	0.510652	0.609595	0.214959	0.969848	0.0132962		AFUN001206	217.16	0.0873486	0.288915	0.302333	0.762398	0.117818	1	0
AFUN001207	12815573	12817204	1632	others	No	cDNA	AFUN001207	others	splicing factor 3B subunit [Source:Projected from Anopheles gambiae (AGAP001538) VB Community Annotation]	NA	No	AFUN001207	127.775	1.01904	0.281008	3.62639	0.000287415	3.54149	0.00127415	2.89478	x	AFUN001207	71.8799	1.14965	1.00712	1.14151	0.253656	0.595754	0.823962	0.0840926		AFUN001207	120.988	0.413168	0.426189	0.969446	0.332322	0.47844	1	0
AFUN001208	12812312	12815237	2926	others	No	cDNA	AFUN001208	others	chromosome transmission fidelity protein [Source:Projected from Anopheles gambiae (AGAP001537) VB Community Annotation]	NA	No	AFUN001208	60.814	0.0513405	0.368007	0.13951	0.889047	0.051075	0.927123	0.0328628		AFUN001208	38.9921	-0.581893	1.10321	-0.527455	0.597877	0.223388	0.965995	0.015025		AFUN001208	51.9303	0.512823	0.469786	1.09161	0.275005	0.560659	1	0
AFUN001210	12770008	12796343	26336	others	No	cDNA	AFUN001210	others	unspecified product	NA	No	AFUN001210	264.109	-0.466662	0.189654	-2.46059	0.0138709	1.85789	0.0356925	1.44742	x	AFUN001210	217.166	0.131492	0.668434	0.196717	0.844049	0.0736322	0.985497	0.0063449		AFUN001210	245.587	-0.308901	0.208467	-1.48177	0.1384	0.858863	1	0
AFUN001211	12725447	12741699	16253	others	No	cDNA	AFUN001211	others	histone-lysine N-methyltransferase ASH1L [Source:Projected from Anopheles gambiae (AGAP001535) VB Community Annotation]	NA	No	AFUN001211	2667.44	0.53669	0.151559	3.54114	0.000398407	3.39967	0.00169383	2.77113	x	AFUN001211	1801.16	0.521491	0.549689	0.948701	0.342772	0.464994	0.882746	0.0541641		AFUN001211	2498.9	0.193324	0.168702	1.14595	0.251817	0.598915	1	0
AFUN001212	12721135	12724771	3637	others	No	cDNA	AFUN001212	others	unspecified product	NA	No	AFUN001212	237.885	-0.539401	0.231513	-2.3299	0.0198115	1.70308	0.0481903	1.31704	x	AFUN001212	231.071	0.470424	0.664795	0.707624	0.479179	0.319502	0.933815	0.0297392		AFUN001212	233.79	-0.679382	0.2563	-2.65072	0.00803194	2.09518	1	0
AFUN001213	12707034	12712737	5704	others	No	cDNA	AFUN001213	others	Rab3 GTPase-activating protein regulatory subunit [Source:Projected from Anopheles gambiae (AGAP001533) VB Community Annotation]	NA	No	AFUN001213	483.739	0.0929794	0.188749	0.49261	0.622288	0.206008	0.722024	0.141448		AFUN001213	351.834	0.103941	0.621279	0.167302	0.867132	0.0619146	0.988212	0.00514969		AFUN001213	442.617	0.0781588	0.225697	0.346299	0.729118	0.137202	1	0
AFUN001214	12672339	12699467	27129	others	No	cDNA	AFUN001214	others	G_PROTEIN_RECEP_F1_2 domain-containing protein [Source:UniProtKB/TrEMBL;Acc:A0A182R4X2]	NA	No	AFUN001214	19.8531	0.55646	0.74737	0.744557	0.45654	0.340522	0.578689	0.237555		AFUN001214	19.7676	0.349443	1.45416	0.240306	0.810093	0.0914651	0.985365	0.00640266		AFUN001214	19.3699	-0.307735	0.857439	-0.3589	0.71967	0.142867	1	0
AFUN001215	12651080	12652134	1055	others	No	cDNA	AFUN001215	others	RING-type domain-containing protein [Source:UniProtKB/TrEMBL;Acc:A0A182R4X3]	NA	No	AFUN001215	55.6776	0.786973	0.713989	1.10222	0.270366	0.568048	0.392078	0.406628		AFUN001215	72.8867	1.30663	1.20565	1.08375	0.278474	0.555215	0.848334	0.0714331		AFUN001215	62.8487	-0.868643	0.952096	-0.912348	0.361586	0.441789	1	0
AFUN001216	12649768	12651048	1281	others	No	cDNA	AFUN001216	others	H/ACA ribonucleoprotein complex subunit [Source:UniProtKB/TrEMBL;Acc:A0A182R4X4]	NA	No	AFUN001216	198.885	1.2411	0.354514	3.50084	0.000463801	3.33367	0.00193258	2.71386	x	AFUN001216	157.62	1.15468	0.767138	1.50518	0.132278	0.878513	0.683863	0.165031		AFUN001216	198.671	-0.0300763	0.44114	-0.0681785	0.945644	0.0242725	1	0
AFUN001217	12648829	12649463	635	others	No	cDNA	AFUN001217	others	U6 snRNA-associated Sm-like protein LSm3 [Source:UniProtKB/TrEMBL;Acc:A0A182R4X5]	NA	No	AFUN001217	91.8954	0.550514	0.247986	2.21994	0.026423	1.57802	0.0610273	1.21448		AFUN001217	84.5122	0.275753	0.934836	0.294974	0.768014	0.114631	0.985365	0.00640266		AFUN001217	87.9862	-0.166216	0.374391	-0.443962	0.65707	0.182388	1	0
AFUN001218	12646956	12648855	1900	others	No	cDNA	AFUN001218	others	glyoxylate/hydroxypyruvate reductase [Source:Projected from Anopheles gambiae (AGAP013478) VB Community Annotation]	NA	No	AFUN001218	150.599	0.154241	0.315377	0.48907	0.624792	0.204264	0.72401	0.140256		AFUN001218	139.506	-0.268834	0.756047	-0.355579	0.722156	0.141369	0.984947	0.00658717		AFUN001218	135.988	-0.11637	0.333321	-0.349124	0.726996	0.138468	1	0
AFUN001219	12645734	12646738	1005	others	No	cDNA	AFUN001219	others	unspecified product	NA	No	AFUN001219	60.936	0.115076	0.257294	0.447254	0.654692	0.183963	0.750075	0.124896		AFUN001219	38.3396	-0.0773607	1.11333	-0.069486	0.944603	0.0247508	0.994196	0.00252795		AFUN001219	54.2089	0.334922	0.349828	0.95739	0.33837	0.470608	1	0
AFUN001220	12636741	12644481	7741	others	No	cDNA	AFUN001220	others	golgi-specific brefeldin a-resistance factor [Source:Projected from Anopheles gambiae (AGAP001527) VB Community Annotation]	NA	No	AFUN001220	1248.55	0.118261	0.0987814	1.1972	0.231227	0.635961	0.348052	0.458356		AFUN001220	1061.56	0.349499	0.582774	0.599715	0.548696	0.260668	0.95534	0.0198421		AFUN001220	1189.32	-0.214521	0.17084	-1.25568	0.209231	0.679375	1	0
AFUN001221	12634439	12636214	1776	others	No	cDNA	AFUN001221	others	RIO domain-containing protein [Source:UniProtKB/TrEMBL;Acc:A0A182R4X9]	NA	No	AFUN001221	8.90384	-7.05307	3.33487	-2.11494	NA	#VALUE!	1	0		AFUN001221	0	NA	NA	NA	NA	#VALUE!	1	0		AFUN001221	7.31034	0	4.08048	0	1	0	1	0
AFUN001222	12632276	12634289	2014	others	No	cDNA	AFUN001222	others	unspecified product	NA	No	AFUN001222	135.402	-0.103177	0.345691	-0.298465	0.765348	0.116141	0.835098	0.0782627		AFUN001222	68.2229	-0.238013	0.903785	-0.263351	0.79228	0.101121	0.985365	0.00640266		AFUN001222	117.369	0.653288	0.399328	1.63597	0.101846	0.992056	1	0
AFUN001226	12574585	12577102	2518	others	No	cDNA	AFUN001226	others	mRNA (2'-O-methyladenosine-N6-)-methyltransferase [Source:Projected from Anopheles gambiae (AGAP002895) VB Community Annotation]	NA	No	AFUN001226	204.493	-0.101393	0.186136	-0.544722	0.585945	0.232143	0.690655	0.160739		AFUN001226	126.521	-0.195565	0.754362	-0.259245	0.795446	0.0993892	0.985365	0.00640266		AFUN001226	180.047	0.342532	0.224074	1.52866	0.126349	0.898429	1	0
AFUN001227	12520173	12533372	13200	others	No	cDNA	AFUN001227	others	Costars domain-containing protein [Source:UniProtKB/TrEMBL;Acc:A0A4Y0AM98]	NA	No	AFUN001227	1367.96	-0.933844	0.376898	-2.47771	0.0132228	1.87868	0.0342806	1.46495	x	AFUN001227	1402.39	-1.02426	0.554701	-1.84652	0.064817	1.18831	0.506186	0.29569		AFUN001227	1118.41	-0.368032	0.409133	-0.899543	0.368363	0.433724	1	0
AFUN001229	12503166	12509565	6400	others	No	cDNA	AFUN001229	others	glutamate--cysteine ligase catalytic subunit [Source:Projected from Anopheles gambiae (AGAP001512) VB Community Annotation]	NA	No	AFUN001229	1850.5	0.940021	0.340941	2.75713	0.00583107	2.23425	0.0171124	1.76669	x	AFUN001229	1939.75	0.91402	0.684065	1.33616	0.181497	0.74113	0.759712	0.119351		AFUN001229	1919.2	-0.439193	0.445351	-0.986173	0.324048	0.48939	1	0
AFUN001230	12501907	12502556	650	others	No	cDNA	AFUN001230	others	unspecified product	NA	No	AFUN001230	1.71624	-0.0897249	1.30393	-0.068811	0.94514	0.0245038	0.964055	0.0158982		AFUN001230	0.314105	2.05026	6.10794	0.335671	0.737119	0.132462	1	0		AFUN001230	1.52109	1.18643	1.86925	0.634708	0.525619	0.279329	1	0
AFUN001232	12485729	12486978	1250	others	No	cDNA	AFUN001232	others	unspecified product	NA	No	AFUN001232	6.46326	-4.5669	1.10822	-4.12092	3.77359e-05	4.42324	0.00021245	3.67274	x	AFUN001232	3.35783	-0.601146	3.13736	-0.191609	0.848048	0.0715794	0.985937	0.0061508		AFUN001232	5.46641	-2.31655	1.28103	-1.80835	0.0705527	1.15149	1	0
AFUN001233	12484070	12484906	837	others	No	cDNA	AFUN001233	others	unspecified product	NA	No	AFUN001233	76.9103	-1.14523	1.16899	-0.979677	NA	#VALUE!	1	0		AFUN001233	108.369	2.48259	1.03945	2.38837	0.0169231	1.77152	0.216534	0.664473		AFUN001233	95.2669	-1.82062	1.35128	-1.34733	NA	#VALUE!	1	0
AFUN001234	12479044	12483216	4173	others	No	cDNA	AFUN001234	others	Fe2OG dioxygenase domain-containing protein [Source:UniProtKB/TrEMBL;Acc:A0A182R4Z2]	NA	No	AFUN001234	912.021	0.261663	0.155781	1.67968	0.0930199	1.03142	0.170112	0.769264		AFUN001234	773.315	0.442385	0.574758	0.769689	0.441485	0.355084	0.924925	0.0338934		AFUN001234	875.606	-0.190843	0.188723	-1.01124	0.311903	0.50598	1	0
AFUN001235	12476237	12478330	2094	others	No	cDNA	AFUN001235	others	guanine nucleotide-binding protein subunit beta, other [Source:Projected from Anopheles gambiae (AGAP001506) VB Community Annotation]	NA	No	AFUN001235	1072.16	-0.181915	0.193431	-0.940463	0.34698	0.459696	0.471871	0.326177		AFUN001235	744.821	-0.500192	0.594398	-0.841511	0.400062	0.397873	0.912653	0.0396943		AFUN001235	925.444	0.273514	0.251754	1.08643	0.277287	0.55707	1	0
AFUN001237	12469120	12470564	1445	others	No	cDNA	AFUN001237	others	mitochondrial 10 kDa heat shock protein [Source:Projected from Anopheles gambiae (AGAP001502) VB Community Annotation]	NA	No	AFUN001237	1622.57	0.362936	0.231085	1.57057	0.116282	0.934489	0.203525	0.691383		AFUN001237	1318.84	0.223537	0.601665	0.371531	0.710242	0.148594	0.983345	0.00729415		AFUN001237	1519.38	-0.0381879	0.303402	-0.125866	0.899838	0.0458355	1	0
AFUN001238	12467389	12469116	1728	others	No	cDNA	AFUN001238	others	Regucalcin protein [Source:Projected from Anopheles gambiae (AGAP001501) VB Community Annotation]	NA	No	AFUN001238	214.635	0.435637	0.302919	1.43813	0.150397	0.822761	0.248877	0.604015		AFUN001238	139.994	0.0365864	0.735904	0.0497162	0.960349	0.0175711	0.995906	0.00178163		AFUN001238	193.377	0.359545	0.362434	0.992031	0.321182	0.493248	1	0
AFUN001239	12463155	12466991	3837	others	No	cDNA	AFUN001239	others	unspecified product	NA	No	AFUN001239	408.82	0.46461	0.174854	2.65712	0.00788106	2.10342	0.0220971	1.65566	x	AFUN001239	289.733	0.624586	0.637593	0.979599	0.327284	0.485075	0.878893	0.0560641		AFUN001239	388.103	0.0785577	0.192775	0.407509	0.683634	0.165176	1	0
AFUN001240	12452597	12463151	10555	others	No	cDNA	AFUN001240	others	G_PROTEIN_RECEP_F1_2 domain-containing protein [Source:UniProtKB/TrEMBL;Acc:A0A182R4Z8]	NA	No	AFUN001240	1070.36	0.409065	0.203576	2.0094	0.044495	1.35169	0.0935567	1.02893		AFUN001240	898.404	0.485589	0.621567	0.781233	0.434665	0.361845	0.923499	0.0345635		AFUN001240	1029.76	-0.146215	0.293124	-0.498816	0.617909	0.209076	1	0
AFUN001241	12446237	12449520	3284	others	No	cDNA	AFUN001241	others	unspecified product	NA	No	AFUN001241	20.7091	-0.250215	0.404104	-0.619186	0.535794	0.271002	0.647815	0.188549		AFUN001241	17.5174	-0.0765208	1.51292	-0.0505783	0.959662	0.0178819	0.995906	0.00178163		AFUN001241	18.9406	-0.178179	0.525158	-0.339286	0.734394	0.134071	1	0
AFUN001242	12424936	12445851	20916	others	No	cDNA	AFUN001242	others	Alpha-actinin, sarcomeric [Source:Projected from Anopheles gambiae (AGAP001497) UniProtKB/Swiss-Prot;Acc:Q7PKQ5]	NA	No	AFUN001242	4931.2	-1.08139	0.195923	-5.51948	3.40004e-08	7.46852	3.70262e-07	6.43149	x	AFUN001242	4190.47	-0.989522	0.542246	-1.82486	0.0680226	1.16735	0.517818	0.285823		AFUN001242	4052.12	-0.188827	0.231985	-0.813963	0.415666	0.381255	1	0
AFUN001243	12416436	12422248	5813	others	No	cDNA	AFUN001243	others	unspecified product	NA	No	AFUN001243	1419.34	0.208698	0.131547	1.5865	0.112627	0.948358	0.198462	0.702324		AFUN001243	1076.76	0.148385	0.56139	0.264317	0.791536	0.101529	0.985365	0.00640266		AFUN001243	1309.9	0.0399233	0.159961	0.249582	0.802911	0.0953327	1	0
AFUN001246	12335167	12337855	2689	others	No	cDNA	AFUN001246	others	unspecified product	NA	No	AFUN001246	169.415	0.573943	0.198252	2.89501	0.00379141	2.4212	0.0119392	1.92302	x	AFUN001246	145.581	0.820369	0.73631	1.11416	0.265209	0.576411	0.837631	0.0769475		AFUN001246	168.011	-0.21177	0.246773	-0.858154	0.390807	0.408037	1	0
AFUN001247	12333776	12334902	1127	others	No	cDNA	AFUN001247	others	Leucine-rich repeat-containing protein [Source:Projected from Anopheles gambiae (AGAP001491) VB Community Annotation]	NA	No	AFUN001247	148.917	0.494884	0.231985	2.13325	0.0329039	1.48275	0.0729085	1.13722		AFUN001247	130.334	0.312793	0.746375	0.419082	0.675156	0.170596	0.982503	0.00766594		AFUN001247	141.985	-0.137714	0.249656	-0.551614	0.581213	0.235665	1	0
AFUN001248	12321492	12333187	11696	others	No	cDNA	AFUN001248	others	Innexin [Source:UniProtKB/TrEMBL;Acc:A0A182R506]	NA	No	AFUN001248	4971.75	-0.332329	0.11687	-2.84358	0.00446095	2.35057	0.0136502	1.86486	x	AFUN001248	4049.02	-0.301482	0.547638	-0.550513	0.581968	0.235101	0.963704	0.0160563		AFUN001248	4422.18	-0.0932938	0.157162	-0.593616	0.552769	0.257456	1	0
AFUN001254	12206310	12219348	13039	others	No	cDNA	AFUN001254	others	NRF domain-containing protein [Source:UniProtKB/TrEMBL;Acc:A0A182R512]	NA	No	AFUN001254	73.0312	0.0895942	0.252165	0.3553	0.722365	0.141244	0.803096	0.0952327		AFUN001254	67.0325	0.251034	0.922061	0.272253	0.785427	0.104894	0.985365	0.00640266		AFUN001254	69.7088	-0.289936	0.329566	-0.87975	0.378995	0.421367	1	0
AFUN001255	12197857	12199750	1894	others	No	cDNA	AFUN001255	others	26S proteasome non-ATPase regulatory subunit [Source:Projected from Anopheles gambiae (AGAP001490) VB Community Annotation]	NA	No	AFUN001255	309.687	-0.432681	0.184916	-2.33988	0.0192899	1.71467	0.0470829	1.32714	x	AFUN001255	217.662	-0.609401	0.677374	-0.899653	0.368305	0.433792	0.892373	0.0494538		AFUN001255	264.646	0.210339	0.242443	0.867583	0.385623	0.413837	1	0
AFUN001256	12195436	12197546	2111	others	No	cDNA	AFUN001256	others	AP-3 complex subunit mu [Source:Projected from Anopheles gambiae (AGAP001484) VB Community Annotation]	NA	No	AFUN001256	183.354	0.426999	0.251938	1.69486	0.0901023	1.04526	0.165918	0.780107		AFUN001256	147.862	0.716542	0.728023	0.98423	0.325003	0.488113	0.877649	0.0566793		AFUN001256	178.508	-0.141241	0.295604	-0.477805	0.632789	0.198741	1	0
AFUN001257	12193600	12195331	1732	others	No	cDNA	AFUN001257	others	Homeobox domain-containing protein [Source:UniProtKB/TrEMBL;Acc:A0A182R515]	NA	No	AFUN001257	6.03641	-0.34411	0.799388	-0.430467	0.666856	0.175968	0.760167	0.119091		AFUN001257	4.08077	-1.87867	2.91999	-0.643382	0.519976	0.284016	0.949719	0.022405		AFUN001257	4.51518	0.96067	1.16971	0.82129	0.411481	0.38565	1	0
AFUN001258	12180030	12185006	4977	others	No	cDNA	AFUN001258	others	unspecified product	NA	No	AFUN001258	814.466	0.770979	0.149246	5.16584	2.39361e-07	6.62095	2.24299e-06	5.64917	x	AFUN001258	604.855	0.8346	0.596902	1.39822	0.162048	0.790357	0.733494	0.134603		AFUN001258	789.308	0.0356813	0.193581	0.184322	0.853761	0.0686639	1	0
AFUN001260	12157363	12159123	1761	others	No	cDNA	AFUN001260	others	Innexin [Source:UniProtKB/TrEMBL;Acc:A0A182R518]	NA	No	AFUN001260	326.369	-1.27255	0.469337	-2.71138	0.00670035	2.1739	0.0192086	1.7165	x	AFUN001260	388.509	-1.64493	0.706374	-2.3287	0.0198752	1.70169	0.238218	0.623025		AFUN001260	237.237	-0.413594	0.510711	-0.809839	0.418033	0.37879	1	0
AFUN001261	12148516	12154986	6471	others	No	cDNA	AFUN001261	others	Innexin inx2 [Source:Projected from Anopheles gambiae (AGAP001476) VB Community Annotation]	NA	No	AFUN001261	1393.36	-0.572455	0.141203	-4.05412	5.03241e-05	4.29822	0.000274481	3.56149	x	AFUN001261	1185.41	-0.61514	0.56407	-1.09054	0.275476	0.559916	0.846718	0.0722615		AFUN001261	1199.5	-0.12437	0.166808	-0.745585	0.455918	0.341113	1	0
AFUN001262	12143931	12148505	4575	others	No	cDNA	AFUN001262	others	unspecified product	NA	No	AFUN001262	547.88	0.00334357	0.12177	0.027458	0.978094	0.00961922	0.986734	0.00579993		AFUN001262	412.44	-0.195227	0.61016	-0.31996	0.748999	0.125519	0.984955	0.00658373		AFUN001262	489.558	0.105018	0.15352	0.684065	0.493934	0.306331	1	0
AFUN001263	12141200	12142563	1364	others	No	cDNA	AFUN001263	others	myosuppressin [Source:Projected from Anopheles gambiae (AGAP001474) VB Community Annotation]	NA	No	AFUN001263	110.657	0.246162	0.371771	0.662134	0.507885	0.294234	0.624243	0.204646		AFUN001263	65.5396	0.304248	0.971733	0.313098	0.754206	0.12251	0.985365	0.00640266		AFUN001263	100.752	0.373223	0.477747	0.781215	0.434676	0.361835	1	0
AFUN001264	12134704	12139938	5235	others	No	cDNA	AFUN001264	others	propionyl-CoA synthetase [Source:Projected from Anopheles gambiae (AGAP001473) VB Community Annotation]	NA	No	AFUN001264	279.445	-0.228917	0.467935	-0.489208	0.624695	0.204332	0.72401	0.140256		AFUN001264	209.426	0.147948	0.680012	0.217567	0.827766	0.0820923	0.985365	0.00640266		AFUN001264	257.491	-0.0893953	0.540932	-0.165261	0.868738	0.0611111	1	0
AFUN001266	12129892	12134693	4802	others	No	cDNA	AFUN001266	others	SAP domain-containing protein [Source:UniProtKB/TrEMBL;Acc:A0A182R524]	NA	No	AFUN001266	857.132	0.307551	0.122699	2.50654	0.0121918	1.91393	0.0320304	1.49444	x	AFUN001266	604.238	0.0628967	0.632859	0.0993851	0.920832	0.0358194	0.992611	0.0032211		AFUN001266	779.1	0.198178	0.231415	0.856375	0.39179	0.406946	1	0
AFUN001268	12112071	12121781	9711	others	No	cDNA	AFUN001268	others	Protein tyrosine phosphatase, receptor type, f polypeptide (PTPRF) interacting protein (liprin) [Source:Projected from Anopheles gambiae (AGAP001469) VB Community Annotation]	NA	No	AFUN001268	795.586	0.158185	0.172034	0.919499	0.357834	0.446318	0.4814	0.317494		AFUN001268	584.686	0.358557	0.603667	0.593964	0.552536	0.257639	0.955725	0.0196669		AFUN001268	744.059	0.00583713	0.215902	0.0270361	0.978431	0.00946981	1	0
AFUN001269	12099120	12110579	11460	others	No	cDNA	AFUN001269	others	unspecified product	NA	No	AFUN001269	1464.42	-1.32896	0.21337	-6.22844	4.71102e-10	9.32689	6.92271e-09	8.15972	x	AFUN001269	1120.74	-1.72878	0.582971	-2.96547	0.00302223	2.51967	0.0587734	1.23082		AFUN001269	1102.92	0.243286	0.268046	0.907628	0.364075	0.43881	1	0
AFUN001271	12092119	12093454	1336	others	No	cDNA	AFUN001271	others	DAMOX [Source:Projected from Anopheles gambiae (AGAP001098) VB Community Annotation]	NA	No	AFUN001271	14.0294	0.577288	0.470958	1.22577	0.220283	0.657018	0.334903	0.475081		AFUN001271	18.0601	1.85851	1.63474	1.13688	0.255588	0.592459	0.825444	0.0833125		AFUN001271	16.3986	-0.938204	0.641114	-1.4634	0.143359	0.843574	1	0
AFUN001273	12073694	12077242	3549	COEs	Yes	cDNA	AFUN001273	COEs	carboxylesterase [Source:Projected from Anopheles gambiae (AGAP001101) VB Community Annotation]	NA	Yes	AFUN001273	278.711	-0.035497	0.360037	-0.0985929	0.921462	0.0355228	0.948845	0.0228047		AFUN001273	242.311	-0.206271	0.670793	-0.307503	0.75846	0.120067	0.985365	0.00640266		AFUN001273	251.95	-0.113422	0.419883	-0.270127	0.787062	0.103991	1	0
AFUN001274	12064293	12072188	7896	others	No	cDNA	AFUN001274	others	C-myc promoter-binding protein [Source:Projected from Anopheles gambiae (AGAP001102) VB Community Annotation]	NA	No	AFUN001274	678.613	0.217349	0.128886	1.68636	0.0917263	1.03751	0.168253	0.774038		AFUN001274	554.447	0.448959	0.590729	0.760009	0.447249	0.34945	0.925565	0.0335928		AFUN001274	648.378	-0.152635	0.156917	-0.972712	0.330696	0.480571	1	0
AFUN001275	12061642	12063691	2050	others	No	cDNA	AFUN001275	others	mitogen-activated protein kinase kinase [Source:Projected from Anopheles gambiae (AGAP001103) VB Community Annotation]	NA	No	AFUN001275	295.808	-0.26817	0.187134	-1.43304	0.151847	0.818594	0.250779	0.600709		AFUN001275	238.793	0.200747	0.657555	0.305293	0.760143	0.119105	0.985365	0.00640266		AFUN001275	276.19	-0.227225	0.210654	-1.07866	0.280737	0.5517	1	0
AFUN001276	12057165	12061180	4016	others	No	cDNA	AFUN001276	others	chromatin assembly factor 1 subunit A [Source:Projected from Anopheles gambiae (AGAP001104) VB Community Annotation]	NA	No	AFUN001276	692.288	-1.77593	0.405561	-4.37896	1.19246e-05	4.92356	7.59827e-05	4.11929	x	AFUN001276	335.374	-0.794984	0.652067	-1.21918	0.222778	0.652128	0.796286	0.0989306		AFUN001276	576.499	0.130951	0.404081	0.324071	0.745884	0.127329	1	0
AFUN001277	12053211	12055991	2781	others	No	cDNA	AFUN001277	others	unspecified product	NA	No	AFUN001277	11.3845	-0.679042	0.492225	-1.37954	0.16773	0.77539	0.271142	0.566802		AFUN001277	11.2812	-0.709278	1.82317	-0.389036	0.69725	0.156612	0.982577	0.00763328		AFUN001277	9.74735	-0.341549	0.637491	-0.535771	0.592117	0.227592	1	0
AFUN001278	11902851	11923357	20507	others	No	cDNA	AFUN001278	others	Disconnected protein [Source:Projected from Anopheles gambiae (AGAP001106) VB Community Annotation]	NA	No	AFUN001278	827.546	-0.330199	0.203615	-1.62169	0.104871	0.979346	0.187644	0.726665		AFUN001278	727.301	-0.442966	0.603405	-0.734111	0.462881	0.334531	0.929879	0.0315737		AFUN001278	728.34	-0.148399	0.252509	-0.587697	0.556736	0.254351	1	0
AFUN001279	11861173	11864835	3663	others	No	cDNA	AFUN001279	others	unspecified product	NA	No	AFUN001279	635.275	-1.68295	0.175471	-9.59103	8.72085e-22	21.0594	5.83577e-20	19.2339	x	AFUN001279	376.562	-1.59043	0.635034	-2.50447	0.0122633	1.91139	0.173126	0.761637		AFUN001279	494.365	0.331174	0.196068	1.68908	0.0912051	1.03998	1	0
AFUN001280	11859736	11861146	1411	others	No	cDNA	AFUN001280	others	Mitochondrial import inner membrane translocase subunit TIM50 [Source:UniProtKB/TrEMBL;Acc:A0A182R538]	NA	No	AFUN001280	237.278	0.345796	0.160705	2.15175	0.0314171	1.50283	0.0701989	1.15367		AFUN001280	184.528	0.364396	0.693884	0.525154	0.599476	0.222228	0.967196	0.0144857		AFUN001280	223.637	-0.0242388	0.202545	-0.119671	0.904744	0.0434744	1	0
AFUN001281	11857467	11858354	888	others	No	cDNA	AFUN001281	others	CAP-Gly domain-containing protein [Source:UniProtKB/TrEMBL;Acc:A0A182R539]	NA	No	AFUN001281	0.438915	-1.62884	3.03185	-0.537242	0.591101	0.228339	1	0		AFUN001281	0.482674	-2.75089	5.85998	-0.469437	0.638757	0.194664	1	0		AFUN001281	0.188556	0.00706383	4.08048	0.00173113	0.998619	0.000600279	1	0
AFUN001284	11832621	11840162	7542	others	No	cDNA	AFUN001284	others	Sorting nexin family member 27 isoform [Source:Projected from Anopheles gambiae (AGAP001110) VB Community Annotation]	NA	No	AFUN001284	1121.65	-0.304984	0.141166	-2.16047	0.0307365	1.51235	0.069053	1.16082		AFUN001284	899.558	-0.320292	0.582635	-0.54973	0.582504	0.234701	0.963704	0.0160563		AFUN001284	994.407	-0.0550727	0.193622	-0.284434	0.776078	0.110095	1	0
AFUN001285	11821253	11832285	11033	others	No	cDNA	AFUN001285	others	unspecified product	NA	No	AFUN001285	822.617	-0.110021	0.146775	-0.749588	0.453503	0.34342	0.575868	0.239677		AFUN001285	603.024	-0.250902	0.584724	-0.429095	0.667854	0.175318	0.981802	0.00797592		AFUN001285	729.635	0.123025	0.17984	0.68408	0.493925	0.306339	1	0
AFUN001286	11824475	11826659	2185	others	No	cDNA	AFUN001286	others	unspecified product	NA	No	AFUN001286	6.34267	-2.65462	1.18638	-2.23758	0.0252486	1.59776	0.0587295	1.23114		AFUN001286	4.73094	-3.61219	3.03718	-1.18933	0.234312	0.630206	0.809256	0.0919142		AFUN001286	3.97047	0.78442	1.88937	0.415176	0.678013	0.168762	1	0
AFUN001289	11784941	11788358	3418	others	No	cDNA	Gr38	others	gustatory receptor	Gr38	No	AFUN001289	0.78371	-0.557314	2.82693	-0.197145	0.843714	0.0738046	0.894082	0.0486226		AFUN001289	1.57052	4.16137	5.62772	0.739441	0.459639	0.337583	1	0		AFUN001289	1.20036	-2.18556	2.7829	-0.785355	0.432245	0.36427	1	0
AFUN001290	11774443	11776433	1991	others	No	cDNA	Gr42	others	gustatory receptor	Gr42	No	AFUN001290	2.8973	0.762842	1.09791	0.69481	0.487174	0.312316	0.606438	0.217214		AFUN001290	4.59014	0.927586	2.85039	0.325424	0.74486	0.127925	0.984947	0.00658717		AFUN001290	3.3236	-1.13499	1.20494	-0.941945	0.346221	0.460647	1	0
AFUN001291	11758752	11760491	1740	others	No	cDNA	AFUN001291	others	D-amino-acid oxidase [Source:Projected from Anopheles gambiae (AGAP001116) VB Community Annotation]	NA	No	AFUN001291	259.967	2.27305	1.02849	2.21008	0.0270994	1.56704	0.0621845	1.20632		AFUN001291	219.359	2.05198	0.826686	2.48218	0.0130582	1.88412	0.180449	0.743645		AFUN001291	274.608	-0.10887	1.21405	-0.0896748	0.928546	0.0321968	1	0
AFUN001292	11754830	11755593	764	others	No	cDNA	AFUN001292	others	unspecified product	NA	No	AFUN001292	0	NA	NA	NA	NA	#VALUE!	1	0		AFUN001292	0	NA	NA	NA	NA	#VALUE!	1	0		AFUN001292	0	NA	NA	NA	NA	#VALUE!	1	0
AFUN001293	11734530	11740721	6192	others	No	cDNA	AFUN001293	others	unspecified product	NA	No	AFUN001293	4.45595	-1.50683	1.07925	-1.39619	0.162658	0.788724	0.264594	0.57742		AFUN001293	4.1038	-4.07948	3.31617	-1.23018	0.21863	0.66029	0.794258	0.100038		AFUN001293	2.54109	1.78631	1.95065	0.915752	0.359797	0.443943	1	0
AFUN001294	11683805	11704292	20488	others	No	cDNA	AFUN001294	others	unspecified product	NA	No	AFUN001294	57.693	-0.469511	0.289714	-1.6206	0.105103	0.978387	0.187927	0.72601		AFUN001294	47.3028	-0.341049	1.01513	-0.335966	0.736896	0.132594	0.984947	0.00658717		AFUN001294	51.13	-0.138318	0.368574	-0.375279	0.707453	0.150302	1	0
AFUN001297	83332386	83380201	47816	others	No	cDNA	AFUN001297	others	unspecified product	NA	No	AFUN001297	122.611	-0.81736	0.173912	-4.69986	2.60337e-06	5.58446	1.91841e-05	4.71706	x	AFUN001297	99.577	-0.69008	0.810196	-0.851744	0.394356	0.404111	0.907747	0.042035		AFUN001297	104.453	-0.11857	0.249351	-0.475513	0.634422	0.197622	1	0
AFUN001298	83442248	83444362	2115	others	No	cDNA	AFUN001298	others	WD_REPEATS_REGION domain-containing protein [Source:UniProtKB/TrEMBL;Acc:A0A182R556]	NA	No	AFUN001298	120.801	-0.516624	0.229863	-2.24753	0.0246062	1.60896	0.0574864	1.24043		AFUN001298	72.0186	-0.327584	0.881532	-0.371608	0.710185	0.148629	0.983345	0.00729415		AFUN001298	105.012	0.303549	0.249937	1.2145	0.224557	0.648674	1	0
AFUN001299	83444357	83445074	718	others	No	cDNA	AFUN001299	others	NTF2-related export protein 1/2 [Source:Projected from Anopheles gambiae (AGAP008234) VB Community Annotation]	NA	No	AFUN001299	40.0218	1.50083	0.42741	3.51146	0.000445654	3.351	0.00186979	2.72821	x	AFUN001299	34.6336	0.853824	1.17181	0.728635	0.466225	0.331405	0.930455	0.0313047		AFUN001299	39.8558	-0.0411268	0.444676	-0.092487	0.926311	0.0332431	1	0
AFUN001300	83445223	83446915	1693	others	No	cDNA	AFUN001300	others	unspecified product	NA	No	AFUN001300	91.5759	0.510662	0.305855	1.66962	0.0949948	1.0223	0.173227	0.761383		AFUN001300	74.8487	1.1807	0.880987	1.3402	0.180181	0.74429	0.758195	0.120219		AFUN001300	92.1841	-0.22891	0.338445	-0.676357	0.498814	0.302061	1	0
AFUN001301	83447275	83456413	9139	others	No	cDNA	Thoc2	others	THO complex subunit 2	Thoc2	No	AFUN001301	1238.2	-0.265879	0.144187	-1.84399	0.0651849	1.18585	0.1276	0.894148		AFUN001301	877.858	-0.356692	0.570391	-0.625346	0.531744	0.274297	0.953434	0.0207092		AFUN001301	1084.6	0.152561	0.176561	0.864073	0.387548	0.411675	1	0
AFUN001303	83468002	83486825	18824	others	No	cDNA	AFUN001303	others	Protein kinase domain-containing protein [Source:UniProtKB/TrEMBL;Acc:A0A182R561]	NA	No	AFUN001303	933.308	0.931606	0.22311	4.17555	2.97262e-05	4.52686	0.000171827	3.76491	x	AFUN001303	585.898	0.922586	0.619242	1.48986	0.13626	0.865631	0.690173	0.161042		AFUN001303	887.282	0.294681	0.277811	1.06072	0.288817	0.539378	1	0
AFUN001304	83493033	83502504	9472	others	No	cDNA	AFUN001304	others	Spatacsin_C domain-containing protein [Source:UniProtKB/TrEMBL;Acc:A0A182R562]	NA	No	AFUN001304	1157.33	1.051	0.331456	3.17086	0.0015199	2.81818	0.00537952	2.26926	x	AFUN001304	1101.74	1.79734	0.575272	3.12434	0.00178207	2.74908	0.0386203	1.41318	x	AFUN001304	1243.4	-0.424016	0.380104	-1.11553	0.264625	0.577369	1	0
AFUN001305	56696190	56696492	303	others	No	cDNA	AFUN001305	others	unspecified product	NA	No	AFUN001305	0	NA	NA	NA	NA	#VALUE!	1	0		AFUN001305	0	NA	NA	NA	NA	#VALUE!	1	0		AFUN001305	0	NA	NA	NA	NA	#VALUE!	1	0
AFUN001306	56650183	56652235	2053	others	No	cDNA	AFUN001306	others	unspecified product	NA	No	AFUN001306	0.104627	-0.519413	3.53382	-0.146983	0.883145	0.0539679	1	0		AFUN001306	0.241337	-1.75094	5.94809	-0.294371	0.768474	0.114371	1	0		AFUN001306	0	NA	NA	NA	NA	#VALUE!	1	0
AFUN001307	56643286	56643522	237	others	No	cDNA	AFUN001307	others	unspecified product	NA	No	AFUN001307	0.209255	-1.61446	3.46572	-0.465838	0.641331	0.192917	1	0		AFUN001307	0.482674	-2.75089	5.85998	-0.469437	0.638757	0.194664	1	0		AFUN001307	0	NA	NA	NA	NA	#VALUE!	1	0
AFUN001309	66735805	66736859	1055	others	No	cDNA	AFUN001309	others	unspecified product	NA	No	AFUN001309	4.39235	-6.0328	1.41043	-4.27729	1.8918e-05	4.72312	0.000114107	3.94269	x	AFUN001309	3.62006	-5.65778	3.723	-1.51968	0.128591	0.89079	0.675429	0.17042		AFUN001309	2.31708	0	3.06483	0	1	0	1	0
AFUN001311	66606105	66608541	2437	others	No	cDNA	AFUN001311	others	unspecified product	NA	No	AFUN001311	32.7229	-1.71374	0.417811	-4.10172	4.10087e-05	4.38712	0.000228158	3.64176	x	AFUN001311	21.8561	-1.49505	1.3785	-1.08455	0.278121	0.555766	0.848334	0.0714331		AFUN001311	25.5285	0.074469	0.564296	0.131968	0.895009	0.0481724	1	0
AFUN001312	66601050	66602554	1505	others	No	cDNA	AFUN001312	others	ribosome assembly protein SQT1 [Source:Projected from Anopheles gambiae (AGAP011387) VB Community Annotation]	NA	No	AFUN001312	256.549	-0.71179	0.149133	-4.77286	1.81625e-06	5.74083	1.39307e-05	4.85603	x	AFUN001312	208.451	-0.844968	0.684252	-1.23488	0.216875	0.66379	0.794258	0.100038		AFUN001312	214.464	-0.0273904	0.200854	-0.13637	0.891529	0.0498645	1	0
AFUN001313	66592052	66600329	8278	others	No	cDNA	AFUN001313	others	unspecified product	NA	No	AFUN001313	523.008	0.49107	0.220764	2.22441	0.0261206	1.58302	0.0604273	1.21877		AFUN001313	394.737	1.09735	0.628814	1.74512	0.0809645	1.09171	0.566428	0.246855		AFUN001313	516.389	-0.109991	0.22944	-0.479391	0.63166	0.199516	1	0
AFUN001317	66562635	66563530	896	others	No	cDNA	AFUN001317	others	peptidyl-tRNA hydrolase, PTH2 family [Source:Projected from Anopheles gambiae (AGAP010871) VB Community Annotation]	NA	No	AFUN001317	65.8137	0.101297	0.340883	0.297161	0.766343	0.115577	0.835516	0.0780452		AFUN001317	55.5905	-0.0587665	0.967819	-0.0607206	0.951582	0.0215539	0.994951	0.00219833		AFUN001317	60.2083	-0.0869833	0.409361	-0.212486	0.831728	0.0800186	1	0
AFUN001318	66550027	66561173	11147	others	No	cDNA	AFUN001318	others	solute carrier family 27 (fatty acid transporter), member 1/4 [Source:Projected from Anopheles gambiae (AGAP010870) VB Community Annotation]	NA	No	AFUN001318	1572.58	0.625769	0.288568	2.16853	0.0301185	1.52117	0.0678676	1.16834		AFUN001318	1226.92	0.658474	0.557756	1.18058	0.237771	0.623842	0.814269	0.0892322		AFUN001318	1517.27	-0.0268848	0.336113	-0.0799875	0.936247	0.0286095	1	0
AFUN001319	66443532	66521555	78024	others	No	cDNA	AFUN001319	others	unspecified product	NA	No	AFUN001319	943.796	-3.91529	0.593734	-6.59435	4.27112e-11	10.3695	7.40656e-10	9.13038	x	AFUN001319	1506.75	-5.03978	0.60626	-8.3129	9.33927e-17	16.0297	1.6373e-14	13.7859	x	AFUN001319	300.228	-0.0243297	0.518566	-0.0469172	0.962579	0.0165635	1	0
AFUN001320	66441939	66443179	1241	others	No	cDNA	AFUN001320	others	6-phosphogluconolactonase [Source:UniProtKB/TrEMBL;Acc:A0A182R578]	NA	No	AFUN001320	168.797	0.504598	0.182442	2.7658	0.0056783	2.24578	0.0167566	1.77581	x	AFUN001320	123.378	0.771194	0.776705	0.992905	0.320756	0.493825	0.875982	0.0575046		AFUN001320	162.501	0.000864487	0.231285	0.00373776	0.997018	0.00129713	1	0
AFUN001321	66428477	66441903	13427	others	No	cDNA	AFUN001321	others	sodium-dependent nutrient amino acid transporter [Source:Projected from Anopheles gambiae (AGAP010865) VB Community Annotation]	NA	No	AFUN001321	168.855	-0.878206	0.159644	-5.50104	3.77548e-08	7.42303	4.07324e-07	6.39006	x	AFUN001321	139.663	-0.240738	0.734387	-0.327808	0.743057	0.128978	0.984947	0.00658717		AFUN001321	151.327	-0.380212	0.184149	-2.0647	0.0389515	1.40948	1	0
AFUN001322	66436733	66437911	1179	others	No	cDNA	AFUN001322	others	unspecified product	NA	No	AFUN001322	6.60063	0.749521	0.855774	0.87584	0.381117	0.418942	0.505004	0.296705		AFUN001322	2.77721	-0.588321	3.788	-0.155312	0.876576	0.0572106	0.988549	0.00500159		AFUN001322	5.54581	1.21037	1.27762	0.947362	0.343454	0.464131	1	0
AFUN001323	66419447	66424388	4942	others	No	cDNA	AFUN001323	others	unspecified product	NA	No	AFUN001323	835.668	0.26659	0.232803	1.14513	0.252153	0.598335	0.372308	0.429097		AFUN001323	582.086	0.531759	0.595083	0.893588	0.371542	0.429992	0.894131	0.0485987		AFUN001323	786.553	0.0703524	0.262074	0.268445	0.788357	0.103277	1	0
AFUN001326	66356488	66362314	5827	others	No	cDNA	AFUN001326	others	unspecified product	NA	No	AFUN001326	42.1804	1.33288	0.44607	2.98805	0.00280761	2.55166	0.00921672	2.03542	x	AFUN001326	35.0269	1.81436	1.19401	1.51955	0.128625	0.890674	0.675429	0.17042		AFUN001326	43.9968	-0.158619	0.523749	-0.302852	0.762002	0.118044	1	0
AFUN001327	66343392	66352669	9278	others	No	cDNA	AFUN001327	others	solute carrier family 45, member 1/2/4 [Source:Projected from Anopheles gambiae (AGAP010854) VB Community Annotation]	NA	No	AFUN001327	239.118	1.51492	0.603158	2.51165	0.0120168	1.92021	0.0316553	1.49955	x	AFUN001327	115.701	1.12969	0.806864	1.4001	0.161483	0.791874	0.733177	0.134791		AFUN001327	222.211	0.735351	0.701317	1.04853	0.294395	0.531069	1	0
AFUN001328	66319570	66323104	3535	others	No	cDNA	AFUN001328	others	unspecified product	NA	No	AFUN001328	93.7289	-0.659592	0.29811	-2.21258	0.0269269	1.56981	0.0618886	1.20839		AFUN001328	71.0861	-0.239809	0.939665	-0.255207	0.798563	0.0976907	0.985365	0.00640266		AFUN001328	83.5047	-0.133849	0.414478	-0.322934	0.746746	0.126827	1	0
AFUN001329	66314368	66336801	22434	others	No	cDNA	AFUN001329	others	unspecified product	NA	No	AFUN001329	102.084	-0.486704	0.299243	-1.62645	0.103854	0.983575	0.186203	0.730013		AFUN001329	74.9746	-0.116551	0.887289	-0.131356	0.895493	0.0479376	0.991504	0.00370554		AFUN001329	91.7293	-0.0612247	0.370442	-0.165275	0.868728	0.0611162	1	0
AFUN001330	66307161	66311935	4775	others	No	cDNA	AFUN001330	others	Fatty acyl-CoA reductase [Source:UniProtKB/TrEMBL;Acc:A0A182R588]	NA	No	AFUN001330	7.70327	-1.95364	1.01336	-1.92788	0.0538704	1.26865	0.109169	0.9619		AFUN001330	2.55998	-1.37457	3.57112	-0.384913	0.700302	0.154714	1	0		AFUN001330	6.19878	0.84564	1.40309	0.602698	0.54671	0.262243	1	0
AFUN001331	66299943	66303361	3419	others	No	cDNA	AFUN001331	others	unspecified product	NA	No	AFUN001331	50.1822	-1.94929	0.362533	-5.37687	7.5791e-08	7.12038	7.773e-07	6.10941	x	AFUN001331	37.3585	-2.09839	1.197	-1.75305	0.0795941	1.09912	0.560499	0.251425		AFUN001331	36.4435	0.178504	0.575757	0.310033	0.756536	0.121171	1	0
AFUN001332	66287677	66293927	6251	others	No	cDNA	AFUN001332	others	unspecified product	NA	No	AFUN001332	16.2632	-6.93875	0.991408	-6.99889	2.58002e-12	11.5884	5.40254e-11	10.2674	x	AFUN001332	10.0414	-3.99023	2.08371	-1.91497	0.0554965	1.25573	0.461658	0.335679		AFUN001332	10.5593	-2.49236	1.38992	-1.79316	0.072947	1.13699	1	0
AFUN001333	66265543	66268167	2625	others	No	cDNA	AFUN001333	others	unspecified product	NA	No	AFUN001333	16.9265	-6.34173	3.19058	-1.98764	0.0468513	1.32928	0.0975151	1.01093		AFUN001333	28.4778	-8.6336	1.95081	-4.42565	9.6152e-06	5.01704	0.000396281	3.402	x	AFUN001333	3.76112	1.11041	3.42903	0.323826	0.74607	0.12722	1	0
AFUN001334	66260321	66262779	2459	others	No	cDNA	AFUN001334	others	unspecified product	NA	No	AFUN001334	3.44986	0.0040568	0.920831	0.00440559	0.996485	0.0015293	0.997736	0.000984512		AFUN001334	6.42887	0.199684	2.44377	0.0817114	0.934876	0.0292459	0.994196	0.00252795		AFUN001334	3.74518	-1.30045	1.01343	-1.28322	0.199416	0.70024	1	0
AFUN001335	56562164	56567419	5256	others	No	cDNA	AFUN001335	others	DDE Tnp4 domain-containing protein [Source:UniProtKB/TrEMBL;Acc:A0A182R593]	NA	No	AFUN001335	1.31733	-4.29057	2.86046	-1.49996	0.133625	0.874112	0.227455	0.643105		AFUN001335	2.65471	-5.2103	4.24313	-1.22794	0.219471	0.658624	0.794258	0.100038		AFUN001335	0.136642	0	4.08048	0	1	0	1	0
AFUN001336	95633615	95634641	1027	others	No	cDNA	AFUN001336	others	unspecified product	NA	No	AFUN001336	1.81558	-2.69026	1.74581	-1.54098	0.123321	0.908964	0.213342	0.670923		AFUN001336	1.93284	-1.03554	4.4659	-0.231877	0.816633	0.0879729	1	0		AFUN001336	1.48975	-1.49796	2.62192	-0.571322	0.567781	0.245819	1	0
AFUN001337	95637870	95638569	700	others	No	cDNA	AFUN001337	others	unspecified product	NA	No	AFUN001337	0.770671	-3.5146	2.47096	-1.42236	0.154921	0.809891	0.2548	0.5938		AFUN001337	1.20669	-4.07275	5.80647	-0.701416	0.483043	0.316014	1	0		AFUN001337	0.203019	0	4.08048	0	1	0	1	0
AFUN001338	95639004	95639589	586	others	No	cDNA	AFUN001338	others	unspecified product	NA	No	AFUN001338	0.209255	-1.61446	3.46572	-0.465838	0.641331	0.192917	1	0		AFUN001338	0.482674	-2.75089	5.85998	-0.469437	0.638757	0.194664	1	0		AFUN001338	0	NA	NA	NA	NA	#VALUE!	1	0
AFUN001339	95642546	95642904	359	others	No	cDNA	AFUN001339	others	unspecified product	NA	No	AFUN001339	0.435374	-2.70141	2.86537	-0.942778	0.345794	0.461182	1	0		AFUN001339	0.241337	-1.75094	5.94809	-0.294371	0.768474	0.114371	1	0		AFUN001339	0.27134	0	4.08048	0	1	0	1	0
AFUN001341	95649530	95650065	536	others	No	cDNA	AFUN001341	others	unspecified product	NA	No	AFUN001341	0	NA	NA	NA	NA	#VALUE!	1	0		AFUN001341	0	NA	NA	NA	NA	#VALUE!	1	0		AFUN001341	0	NA	NA	NA	NA	#VALUE!	1	0
AFUN001342	95650608	95651566	959	others	No	cDNA	AFUN001342	others	unspecified product	NA	No	AFUN001342	3.01251	-4.96003	1.37612	-3.60437	0.000312915	3.50457	0.00137289	2.86237	x	AFUN001342	1.9307	-4.75085	4.87614	-0.974305	0.329905	0.481611	1	0		AFUN001342	1.78528	0.00706724	2.74705	0.00257267	0.997947	0.000892389	1	0
AFUN001343	95654852	95655338	487	others	No	cDNA	AFUN001343	others	unspecified product	NA	No	AFUN001343	0.572307	0.318416	3.48167	0.091455	0.927131	0.0328589	0.952477	0.0211455		AFUN001343	0	NA	NA	NA	NA	#VALUE!	1	0		AFUN001343	0.468979	1.16825	4.06946	0.287079	0.774052	0.11123	1	0
AFUN001345	95662784	95663662	879	others	No	cDNA	AFUN001345	others	unspecified product	NA	No	AFUN001345	0.209255	-1.61446	3.46572	-0.465838	0.641331	0.192917	1	0		AFUN001345	0.482674	-2.75089	5.85998	-0.469437	0.638757	0.194664	1	0		AFUN001345	0	NA	NA	NA	NA	#VALUE!	1	0
AFUN001349	72346680	72348056	1377	others	No	cDNA	AFUN001349	others	Peptidase S1 domain-containing protein [Source:UniProtKB/TrEMBL;Acc:A0A182R5A7]	NA	No	AFUN001349	3.59125	-3.04462	1.05782	-2.87821	0.00399937	2.39801	0.012471	1.9041	x	AFUN001349	4.1755	-4.37616	3.28412	-1.33252	0.182689	0.738287	0.759719	0.119347		AFUN001349	1.68435	0.509466	1.9527	0.260903	0.794168	0.100088	1	0
AFUN001350	72467605	72469355	1751	others	No	cDNA	AFUN001350	others	unspecified product	NA	No	AFUN001350	2.91707	-3.77408	1.81193	-2.08291	0.0372598	1.42876	0.0806695	1.09329		AFUN001350	2.17203	-4.92078	4.62957	-1.0629	0.287827	0.540869	1	0		AFUN001350	1.62165	0.993459	3.28892	0.302062	0.762605	0.117701	1	0
AFUN001351	72584495	72593728	9234	IMPs	Yes	cDNA	TOLL7	others	TOLL-like receptor 7 [Source:UniProtKB/TrEMBL;Acc:A0A182R5A9]	TOLL7	No	AFUN001351	762.273	-0.308471	0.267676	-1.15241	0.249154	0.603531	0.369204	0.432733		AFUN001351	562.868	-0.230458	0.598712	-0.384923	0.700294	0.154719	0.982577	0.00763328		AFUN001351	677.752	0.0314953	0.320426	0.098292	0.9217	0.0354102	1	0
AFUN001352	72617082	72617739	658	others	No	cDNA	AFUN001352	others	unspecified product	NA	No	AFUN001352	0.0832134	-0.519413	3.53382	-0.146983	0.883145	0.0539679	1	0		AFUN001352	0	NA	NA	NA	NA	#VALUE!	1	0		AFUN001352	0.0683209	0	4.08048	0	1	0	1	0
AFUN001355	72845008	72845878	871	others	No	cDNA	AFUN001355	others	Odorant binding protein 24 [Source:UniProtKB/TrEMBL;Acc:E5FD98]	NA	No	AFUN001355	2.06904	-1.36921	1.33565	-1.02512	0.305305	0.515266	0.429068	0.367474		AFUN001355	1.20669	-4.07275	5.80647	-0.701416	0.483043	0.316014	1	0		AFUN001355	1.26827	2.27458	2.48574	0.915051	0.360165	0.443499	1	0
AFUN001356	72848308	72849034	727	OPs	Yes	cDNA	AFUN001356	others	odorant-binding protein [Source:Projected from Anopheles gambiae (AGAP012318) VB Community Annotation]	NA	No	AFUN001356	0.104627	-0.519413	3.53382	-0.146983	0.883145	0.0539679	1	0		AFUN001356	0.241337	-1.75094	5.94809	-0.294371	0.768474	0.114371	1	0		AFUN001356	0	NA	NA	NA	NA	#VALUE!	1	0
AFUN001357	72853938	72856088	2151	others	No	cDNA	AFUN001357	others	unspecified product	NA	No	AFUN001357	145.995	0.431734	0.564712	0.764522	0.444556	0.352073	0.567614	0.245947		AFUN001357	155.788	1.97533	0.839035	2.35429	0.0185582	1.73146	0.228257	0.641576		AFUN001357	162.696	-0.754421	0.66639	-1.1321	0.257591	0.589069	1	0
AFUN001358	72864500	72868369	3870	others	No	cDNA	AFUN001358	others	unspecified product	NA	No	AFUN001358	20.3601	-0.914023	0.614772	-1.48677	0.137076	0.863038	0.231968	0.634572		AFUN001358	7.10146	-0.652948	2.24923	-0.290299	0.771588	0.112615	0.985365	0.00640266		AFUN001358	17.0009	0.986762	0.779485	1.26591	0.205544	0.687096	1	0
AFUN001359	72870129	72870996	868	others	No	cDNA	AFUN001359	others	female reproductive tract protease GLEANR_897 [Source:Projected from Anopheles gambiae (AGAP012315) VB Community Annotation]	NA	No	AFUN001359	5.44369	-1.95205	0.850594	-2.29493	0.0217371	1.6628	0.0518174	1.28552		AFUN001359	4.97764	-0.361889	2.67866	-0.135101	0.892532	0.0493761	0.990567	0.00411626		AFUN001359	4.86393	-1.04159	1.14054	-0.913248	0.361112	0.442358	1	0
AFUN001361	72877859	72878678	820	others	No	cDNA	AFUN001361	others	unspecified product	NA	No	AFUN001361	55.3558	-0.474835	0.29182	-1.62715	0.103705	0.984199	0.186013	0.730456		AFUN001361	42.9529	-0.54502	1.05371	-0.51724	0.604988	0.218253	0.969636	0.0133912		AFUN001361	47.8438	0.0272918	0.381471	0.0715436	0.942965	0.0255044	1	0
AFUN001364	72938251	72949479	11229	others	No	cDNA	AFUN001364	others	PCM1_C domain-containing protein [Source:UniProtKB/TrEMBL;Acc:A0A182R5C2]	NA	No	AFUN001364	1587.69	0.249867	0.163023	1.53271	0.125347	0.901887	0.216073	0.6654		AFUN001364	1119.45	0.528945	0.576277	0.917865	0.35869	0.445281	0.887381	0.0518896		AFUN001364	1496.18	0.0481883	0.183587	0.262482	0.79295	0.100754	1	0
AFUN001367	72954075	72955176	1102	others	No	cDNA	AFUN001367	others	translation initiation factor IF-3 [Source:Projected from Anopheles gambiae (AGAP012309) VB Community Annotation]	NA	No	AFUN001367	121.433	-0.941737	0.218217	-4.31561	1.59165e-05	4.79815	9.80456e-05	4.00857	x	AFUN001367	94.297	-0.993746	0.81345	-1.22164	0.221842	0.653955	0.795915	0.0991332		AFUN001367	99.7107	0.0127688	0.285901	0.0446615	0.964377	0.0157531	1	0
AFUN001368	72961326	72963967	2642	others	No	cDNA	AFUN001368	others	ornithine decarboxylase [Source:Projected from Anopheles gambiae (AGAP012308) VB Community Annotation]	NA	No	AFUN001368	45.4437	-2.19922	0.339418	-6.47938	9.21002e-11	10.0357	1.50895e-09	8.82132	x	AFUN001368	40.6077	-2.86371	1.10173	-2.59929	0.00934161	2.02958	0.141766	0.848429		AFUN001368	29.0712	0.275996	0.482852	0.571595	0.567597	0.24596	1	0
AFUN001369	72999018	73014283	15266	others	No	cDNA	AFUN001369	others	Spondin-1 [Source:Projected from Anopheles gambiae (AGAP012307) VB Community Annotation]	NA	No	AFUN001369	1671.22	-0.433576	0.226956	-1.9104	0.0560821	1.25118	0.112863	0.947449		AFUN001369	1387.26	-0.460718	0.555351	-0.829597	0.406767	0.390655	0.914384	0.0388715		AFUN001369	1462.81	-0.0973773	0.264332	-0.36839	0.712582	0.147165	1	0
AFUN001372	73054593	73068440	13848	others	No	cDNA	AFUN001372	others	Muscle LIM protein at 84B [Source:Projected from Anopheles gambiae (AGAP012305) VB Community Annotation]	NA	No	AFUN001372	6737.81	-0.326239	0.183734	-1.7756	0.0757983	1.12034	0.144498	0.840138		AFUN001372	6458.52	-0.0480149	0.567136	-0.0846619	0.93253	0.0303371	0.994146	0.00254988		AFUN001372	6261.83	-0.417239	0.245818	-1.69735	0.0896304	1.04754	1	0
AFUN001373	73077389	73078768	1380	others	No	cDNA	AFUN001373	others	Transgelin [Source:UniProtKB/TrEMBL;Acc:A0A182R5D1]	NA	No	AFUN001373	1977.97	-0.0867278	0.131951	-0.657274	0.511005	0.291575	0.62699	0.202739		AFUN001373	1769.94	0.152926	0.549537	0.278281	0.780797	0.107462	0.985365	0.00640266		AFUN001373	1862.33	-0.29556	0.157087	-1.88151	0.0599028	1.22255	1	0
AFUN001374	73082683	73087110	4428	others	No	cDNA	AFUN001374	others	Homeobox domain-containing protein [Source:UniProtKB/TrEMBL;Acc:A0A182R5D2]	NA	No	AFUN001374	2.16356	-1.58434	1.28333	-1.23455	0.216999	0.663542	0.331406	0.479639		AFUN001374	0.965348	-3.75084	5.81542	-0.644981	0.518939	0.284884	1	0		AFUN001374	1.43167	2.21768	2.40632	0.921607	0.356734	0.447656	1	0
AFUN001376	73112155	73120245	8091	others	No	cDNA	AFUN001376	others	sodium-independent sulfate anion transporter [Source:Projected from Anopheles gambiae (AGAP012302) VB Community Annotation]	NA	No	AFUN001376	1707.3	-0.916261	0.29946	-3.05971	0.00221553	2.65452	0.0074767	2.12629	x	AFUN001376	1521.5	-1.44361	0.594946	-2.42646	0.0152471	1.81681	0.200552	0.697773		AFUN001376	1318.37	0.0688966	0.337761	0.20398	0.838369	0.0765648	1	0
AFUN001377	73120253	73120609	357	others	No	cDNA	AFUN001377	others	unspecified product	NA	No	AFUN001377	0.138506	0.923262	3.53382	0.261265	0.793888	0.100241	1	0		AFUN001377	0	NA	NA	NA	NA	#VALUE!	1	0		AFUN001377	0.113522	0.00705779	4.08048	0.00172965	0.99862	0.000599766	1	0
AFUN001378	73123487	73125035	1549	others	No	cDNA	AFUN001378	others	N4-(beta-N-acetylglucosaminyl)-L-asparaginase [Source:Projected from Anopheles gambiae (AGAP012301) VB Community Annotation]	NA	No	AFUN001378	99.9816	-0.738393	0.315637	-2.33937	0.0193161	1.71408	0.047138	1.32663	x	AFUN001378	70.5364	-0.72062	0.886885	-0.812529	0.416488	0.380397	0.918211	0.0370575		AFUN001378	84.4912	0.121935	0.390866	0.31196	0.755071	0.122012	1	0
AFUN001381	73202313	73206430	4118	others	No	cDNA	AFUN001381	others	unspecified product	NA	No	AFUN001381	366.851	-0.0014342	0.211165	-0.00679186	0.994581	0.00235988	0.996774	0.00140329		AFUN001381	199.697	-0.199695	0.683979	-0.29196	0.770317	0.113331	0.985365	0.00640266		AFUN001381	320.251	0.564794	0.233613	2.41765	0.0156213	1.80628	1	0
AFUN001382	73206528	73208978	2451	CYPs	Yes	cDNA	CYP9J5	CYPs	cytochrome P450	CYP9J5	Yes	AFUN001382	993.99	0.903759	0.340144	2.65699	0.00788423	2.10324	0.0221011	1.65559	x	AFUN001382	808.036	0.417682	0.572378	0.729731	0.465555	0.332029	0.930455	0.0313047		AFUN001382	946.784	0.0385919	0.363849	0.106066	0.91553	0.0383273	1	0
AFUN001383	73210543	73213021	2479	CYPs	Yes	cDNA	CYP9J5_1	CYPs	cytochrome P450	CYP9J5	Yes	AFUN001383	259.226	1.1843	0.319129	3.71103	0.000206415	3.68526	0.000948337	3.02304	x	AFUN001383	196.84	1.19769	0.685014	1.74841	0.0803927	1.09478	0.564094	0.248649		AFUN001383	257.762	0.0165452	0.37026	0.0446854	0.964358	0.0157617	1	0
AFUN001387	73285000	73291250	6251	others	No	cDNA	AFUN001387	others	unspecified product	NA	No	AFUN001387	644.163	0.143198	0.222335	0.644063	0.519535	0.284386	0.634043	0.197881		AFUN001387	487.146	-0.209171	0.664228	-0.314909	0.752831	0.123303	0.985365	0.00640266		AFUN001387	574.925	0.142635	0.319674	0.44619	0.65546	0.183454	1	0
AFUN001388	73303389	73307718	4330	others	No	cDNA	AFUN001388	others	Vang-like protein [Source:UniProtKB/TrEMBL;Acc:A0A182R5E5]	NA	No	AFUN001388	297.062	0.137416	0.204979	0.670391	0.502608	0.29877	0.619966	0.207632		AFUN001388	208.636	-0.0635352	0.694371	-0.0915004	0.927095	0.0328758	0.99331	0.00291518		AFUN001388	266.996	0.193155	0.271964	0.710224	0.477565	0.320967	1	0
AFUN001389	73327331	73330163	2833	others	No	cDNA	AFUN001389	others	AarF domain containing kinase 1 precursor [Source:Projected from Anopheles gambiae (AGAP012287) VB Community Annotation]	NA	No	AFUN001389	238.204	-0.624419	0.205046	-3.04526	0.00232478	2.63362	0.0078	2.10791	x	AFUN001389	182.061	-0.0959683	0.707187	-0.135704	0.892055	0.0496083	0.990567	0.00411626		AFUN001389	215.065	-0.202114	0.244671	-0.826064	0.408768	0.388523	1	0
AFUN001391	73335042	73336496	1455	others	No	cDNA	AFUN001391	others	60S ribosomal protein L18a [Source:UniProtKB/TrEMBL;Acc:A0A182R5E8]	NA	No	AFUN001391	14133.5	-0.545163	0.180617	-3.01833	0.00254172	2.59487	0.00843693	2.07382	x	AFUN001391	10946	-0.275426	0.538719	-0.511262	0.609168	0.215263	0.969848	0.0132962		AFUN001391	12556.4	-0.11611	0.212077	-0.547488	0.584044	0.233555	1	0
AFUN001392	73336750	73339483	2734	others	No	cDNA	AFUN001392	others	unspecified product	NA	No	AFUN001392	215.58	0.937978	0.452055	2.07492	0.0379938	1.42029	0.0820222	1.08607		AFUN001392	145.062	2.46431	0.764935	3.22159	0.0012748	2.89456	0.0290191	1.53732	x	AFUN001392	219.976	-0.0168312	0.407445	-0.0413091	0.967049	0.0145513	1	0
AFUN001394	73370540	73428089	57550	others	No	cDNA	AFUN001394	others	unspecified product	NA	No	AFUN001394	1665.9	-1.1856	0.243807	-4.86284	1.15711e-06	5.93663	9.32921e-06	5.03016	x	AFUN001394	1260.89	-0.908905	0.613435	-1.48167	0.138429	0.858773	0.693609	0.158885		AFUN001394	1381.5	-0.115576	0.328119	-0.352238	0.72466	0.139866	1	0
AFUN001395	73410215	73412427	2213	others	No	cDNA	AFUN001395	others	amiloride-sensitive sodium channel [Source:Projected from Anopheles gambiae (AGAP012279) VB Community Annotation]	NA	No	AFUN001395	26.8863	-4.42604	0.568722	-7.78244	7.11369e-15	14.1479	2.19835e-13	12.6579	x	AFUN001395	18.4871	-5.65576	1.87173	-3.02167	0.00251384	2.59966	0.0509096	1.2932		AFUN001395	15.9265	1.2768	1.31386	0.971791	0.331155	0.479969	1	0
AFUN001397	73447019	73451022	4004	others	No	cDNA	AFUN001397	others	unspecified product	NA	No	AFUN001397	6.6688	-2.80984	0.754224	-3.72547	0.000194951	3.71007	0.000905446	3.04314	x	AFUN001397	5.69843	-2.37649	2.52583	-0.940874	0.346769	0.459959	0.884113	0.0534923		AFUN001397	4.58086	-0.449273	1.19204	-0.376894	0.706252	0.15104	1	0
AFUN001402	40376609	40377370	762	others	No	cDNA	AFUN001402	others	unspecified product	NA	No	AFUN001402	1.06808	-3.99646	3.35787	-1.19018	0.233977	0.630826	0.351035	0.45465		AFUN001402	0	NA	NA	NA	NA	#VALUE!	1	0		AFUN001402	0.87554	0	4.08048	0	1	0	1	0
AFUN001410	73470876	73476509	5634	others	No	cDNA	AFUN001410	others	Neuroglobin [Source:Projected from Anopheles gambiae (AGAP012257) UniProtKB/TrEMBL;Acc:A0A1S4H8T3]	NA	No	AFUN001410	79.8105	-0.285431	0.462066	-0.617726	0.536756	0.270223	0.648732	0.187935		AFUN001410	52.3084	-0.374893	1.01167	-0.370568	0.710959	0.148155	0.983345	0.00729415		AFUN001410	69.5293	0.274242	0.572355	0.479146	0.631835	0.199396	1	0
AFUN001412	73480317	73551633	71317	others	No	cDNA	AFUN001412	others	Polypeptide N-acetylgalactosaminyltransferase [Source:UniProtKB/TrEMBL;Acc:A0A182R5G9]	NA	No	AFUN001412	871.741	0.0185806	0.0968534	0.191842	0.847866	0.0716729	0.896918	0.0472475		AFUN001412	680.174	0.0471558	0.579464	0.0813783	0.935141	0.0291229	0.994196	0.00252795		AFUN001412	799.572	-0.0264081	0.12469	-0.21179	0.832271	0.0797354	1	0
AFUN001413	73552094	73558718	6625	others	No	cDNA	AFUN001413	others	BTB domain-containing protein [Source:UniProtKB/TrEMBL;Acc:A0A182R5H0]	NA	No	AFUN001413	62.8768	0.348787	0.277501	1.25689	0.208795	0.68028	0.322153	0.491937		AFUN001413	43.7374	0.270555	1.0576	0.25582	0.79809	0.097948	0.985365	0.00640266		AFUN001413	58.0588	0.188854	0.356894	0.529161	0.596694	0.224248	1	0
AFUN001415	73575217	73577467	2251	others	No	cDNA	AFUN001415	others	Polypeptide N-acetylgalactosaminyltransferase [Source:UniProtKB/TrEMBL;Acc:A0A182R5H2]	NA	No	AFUN001415	77.825	0.291871	0.225949	1.29176	0.196442	0.706766	0.307781	0.511758		AFUN001415	75.1074	0.29165	0.915854	0.318445	0.750147	0.124854	0.985155	0.00649534		AFUN001415	75.1487	-0.307981	0.315603	-0.97585	0.329139	0.482621	1	0
AFUN001420	21235637	21250569	14933	others	No	cDNA	AFUN001420	others	BCL2/adenovirus E1B 19 kDa protein-interacting protein [Source:Projected from Anopheles gambiae (AGAP001411) VB Community Annotation]	NA	No	AFUN001420	2134.17	0.0984069	0.174601	0.563612	0.573019	0.241831	0.679303	0.167937		AFUN001420	1556.65	0.000622738	0.575787	0.00108154	0.999137	0.000374934	0.999842	6.85588e-05		AFUN001420	1936.61	0.110524	0.236439	0.467454	0.640175	0.193701	1	0
AFUN001423	52030107	52030473	367	others	No	cDNA	AFUN001423	others	unspecified product	NA	No	AFUN001423	0.369576	0.442368	3.22711	0.137079	0.890968	0.0501377	1	0		AFUN001423	0	NA	NA	NA	NA	#VALUE!	1	0		AFUN001423	0.303581	0.48795	4.08048	0.119582	0.904815	0.0434404	1	0
AFUN001424	52031278	52032909	1632	others	No	cDNA	AFUN001424	others	unspecified product	NA	No	AFUN001424	3.76373	0.0284219	1.25023	0.0227334	0.981863	0.00794913	0.988914	0.00484152		AFUN001424	4.11023	1.20452	3.33791	0.360861	0.718203	0.143753	0.984947	0.00658717		AFUN001424	4.03715	-0.774609	1.68076	-0.460869	0.644892	0.190513	1	0
AFUN001426	78533433	78536144	2712	others	No	cDNA	AFUN001426	others	solute carrier family 6 (neurotransmitter transporter, GABA) member [Source:Projected from Anopheles gambiae (AGAP009768) VB Community Annotation]	NA	No	AFUN001426	394.309	-1.1794	0.292104	-4.03761	5.39995e-05	4.26761	0.000290677	3.53659	x	AFUN001426	360.369	-1.24954	0.725321	-1.72274	0.0849359	1.07091	0.581385	0.235536		AFUN001426	312.745	-0.207315	0.416564	-0.497678	0.618711	0.208512	1	0
AFUN001431	31647981	31650245	2265	others	No	cDNA	Gr14	others	gustatory receptor	Gr14	No	AFUN001431	3.21006	-1.37388	0.934774	-1.46975	0.141631	0.848843	0.23769	0.623989		AFUN001431	2.72855	-2.28936	3.52431	-0.649592	0.515956	0.287387	0.947828	0.0232707		AFUN001431	2.23096	0.473214	1.49593	0.316334	0.751749	0.123927	1	0
AFUN001435	31625731	31628644	2914	others	No	cDNA	AFUN001435	others	unspecified product	NA	No	AFUN001435	5.38926	0.152296	0.973135	0.1565	0.875639	0.0576749	0.917878	0.0372151		AFUN001435	7.00673	0.401401	2.26811	0.176976	0.859527	0.0657403	0.987156	0.00561427		AFUN001435	5.54171	-0.857551	1.09404	-0.783837	0.433136	0.363376	1	0
AFUN001436	31623558	31625653	2096	others	No	cDNA	AFUN001436	others	ADP-dependent glucokinase [Source:Projected from Anopheles gambiae (AGAP006394) UniProtKB/TrEMBL;Acc:Q7Q5J7]	NA	No	AFUN001436	150.077	0.685955	0.211678	3.24055	0.00119299	2.92336	0.00436208	2.36031	x	AFUN001436	101.804	0.575065	0.797228	0.721331	0.470706	0.32725	0.930455	0.0313047		AFUN001436	141.195	0.21003	0.254342	0.82578	0.408929	0.388352	1	0
AFUN001437	31621997	31623557	1561	others	No	cDNA	AFUN001437	others	unspecified product	NA	No	AFUN001437	182.248	1.9179	0.283124	6.77406	1.25219e-11	10.9023	2.33993e-10	9.6308	x	AFUN001437	101.902	1.68457	0.880224	1.9138	0.0556463	1.25456	0.46225	0.335123		AFUN001437	176.002	0.482126	0.388782	1.24009	0.214941	0.667681	1	0
AFUN001438	31620450	31621831	1382	others	No	cDNA	AFUN001438	others	high mobility group protein 2-like [Source:Projected from Anopheles gambiae (AGAP006392) VB Community Annotation]	NA	No	AFUN001438	81.6761	-0.581624	0.278262	-2.0902	0.0366	1.43652	0.07963	1.09892		AFUN001438	62.5322	0.00597958	0.931443	0.00641969	0.994878	0.00223023	0.999499	0.000217778		AFUN001438	74.5024	-0.206116	0.333919	-0.617264	0.537061	0.269977	1	0
AFUN001439	31618161	31620425	2265	others	No	cDNA	AFUN001439	others	UBX domain protein [Source:Projected from Anopheles gambiae (AGAP006391) VB Community Annotation]	NA	No	AFUN001439	307.793	-0.221168	0.198651	-1.11335	0.265559	0.57584	0.386733	0.412589		AFUN001439	235.214	-0.294717	0.701861	-0.419907	0.674553	0.170984	0.982503	0.00766594		AFUN001439	272.562	0.0320491	0.291402	0.109983	0.912423	0.0398037	1	0
AFUN001440	31616581	31617910	1330	others	No	cDNA	AFUN001440	others	ribonuclease kappa [Source:Projected from Anopheles gambiae (AGAP006389) VB Community Annotation]	NA	No	AFUN001440	1372.41	0.228858	0.154465	1.48162	0.138441	0.858735	0.233504	0.631706		AFUN001440	1121.8	0.00931247	0.566838	0.0164288	0.986892	0.00573024	0.999408	0.000257281		AFUN001440	1260.48	-0.0183661	0.16923	-0.108528	0.913577	0.0392547	1	0
AFUN001441	31611849	31616501	4653	others	No	cDNA	AFUN001441	others	Structural maintenance of chromosomes protein [Source:UniProtKB/TrEMBL;Acc:A0A182R5J8]	NA	No	AFUN001441	475.888	-0.581265	0.145179	-4.00378	6.23372e-05	4.20525	0.000329718	3.48186	x	AFUN001441	318.931	-0.493874	0.627619	-0.786901	0.43134	0.36518	0.923499	0.0345635		AFUN001441	410.262	0.163201	0.156505	1.04279	0.297048	0.527174	1	0
AFUN001442	31609700	31611695	1996	others	No	cDNA	AFUN001442	others	DNA primase large subunit [Source:Projected from Anopheles gambiae (AGAP006387) UniProtKB/TrEMBL;Acc:Q7Q5K2]	NA	No	AFUN001442	60.9727	-0.825209	0.513762	-1.60621	0.108228	0.965659	0.192357	0.715891		AFUN001442	33.3018	0.131591	1.25548	0.104813	0.916524	0.0378562	0.992119	0.00343612		AFUN001442	54.4821	0.142057	0.626338	0.226805	0.820575	0.0858817	1	0
AFUN001443	31605202	31609090	3889	others	No	cDNA	AFUN001443	others	transcription factor AP-1 [Source:Projected from Anopheles gambiae (AGAP006386) VB Community Annotation]	NA	No	AFUN001443	4682.85	-0.134367	0.490121	-0.274151	0.783969	0.105701	0.848164	0.0715202		AFUN001443	3777.26	-0.411429	0.623285	-0.660097	0.509192	0.293119	0.945716	0.0242395		AFUN001443	4113.62	0.0380424	0.588149	0.0646815	0.948428	0.0229958	1	0
AFUN001444	31596022	31596920	899	others	No	cDNA	AFUN001444	others	Peptidase S1 domain-containing protein [Source:UniProtKB/TrEMBL;Acc:A0A182R5K1]	NA	No	AFUN001444	1.41759	-2.36037	1.88334	-1.25329	0.210101	0.677571	0.323582	0.490016		AFUN001444	1.7632	-1.28544	4.23316	-0.30366	0.761387	0.118395	1	0		AFUN001444	1.10411	-1.394	2.41145	-0.578078	0.563212	0.249328	1	0
AFUN001445	31588622	31592732	4111	others	No	cDNA	AFUN001445	others	GA-binding protein transcription factor, beta [Source:Projected from Anopheles gambiae (AGAP006384) VB Community Annotation]	NA	No	AFUN001445	371.701	-0.0312168	0.150985	-0.206754	0.836202	0.0776887	0.888783	0.0512043		AFUN001445	272.78	0.0529028	0.677543	0.0780803	0.937764	0.0279064	0.994196	0.00252795		AFUN001445	338.886	0.0343831	0.234819	0.146424	0.883587	0.0537509	1	0
AFUN001446	31586711	31588262	1552	others	No	cDNA	AFUN001446	others	oligosaccharyltransferase complex subunit beta [Source:Projected from Anopheles gambiae (AGAP006383) VB Community Annotation]	NA	No	AFUN001446	582.195	0.603605	0.175056	3.44807	0.000564612	3.24825	0.00228476	2.64116	x	AFUN001446	441.771	0.610325	0.65418	0.932962	0.35084	0.454892	0.884113	0.0534923		AFUN001446	557.313	0.0162609	0.271384	0.0599183	0.952221	0.0212624	1	0
AFUN001450	124822	131102	6281	others	No	cDNA	AFUN001450	others	AP-1 complex subunit sigma 1/2 [Source:Projected from Anopheles gambiae (AGAP004283) VB Community Annotation]	NA	No	AFUN001450	197.707	0.21622	0.187937	1.15049	0.249942	0.602161	0.369899	0.431917		AFUN001450	197.962	0.473348	0.694728	0.681343	0.495655	0.304821	0.941598	0.0261347		AFUN001450	195.432	-0.446842	0.233508	-1.91361	0.0556703	1.25438	1	0
AFUN001454	19946	51434	31489	others	No	cDNA	AFUN001454	others	unspecified product	NA	No	AFUN001454	4062.06	-1.9344	0.122223	-15.8268	2.03353e-56	55.6917	1.60205e-53	52.7953	x	AFUN001454	3352.79	-1.99566	0.551113	-3.62114	0.000293303	3.53268	0.00822228	2.08501	x	AFUN001454	2937.11	-0.0611183	0.159863	-0.382318	0.702226	0.153523	1	0
AFUN001455	9919	11476	1558	others	No	cDNA	AFUN001455	others	unspecified product	NA	No	AFUN001455	0.104627	-0.519413	3.53382	-0.146983	0.883145	0.0539679	1	0		AFUN001455	0.869547	0.413646	5.88076	0.0703387	0.943924	0.025063	1	0		AFUN001455	0.223036	-2.63686	3.98192	-0.662207	0.507838	0.294275	1	0
AFUN001458	4093443	4121615	28173	others	No	cDNA	AFUN001458	others	tubulin polyglutamylase TTLL5 [Source:Projected from Anopheles gambiae (AGAP004288) VB Community Annotation]	NA	No	AFUN001458	550.825	0.681211	0.247308	2.7545	0.00587815	2.23076	0.017215	1.76409	x	AFUN001458	339.239	0.740029	0.631069	1.17266	0.240933	0.618104	0.818627	0.0869139		AFUN001458	517.042	0.306779	0.274741	1.11661	0.26416	0.578132	1	0
AFUN001459	4091576	4092913	1338	others	No	cDNA	AFUN001459	others	Molybdopterin synthase catalytic subunit [Source:Projected from Anopheles gambiae (AGAP013168) UniProtKB/Swiss-Prot;Acc:Q7QAD7]	NA	No	AFUN001459	448.338	-0.179016	0.146997	-1.21782	0.223291	0.651129	0.338745	0.470127		AFUN001459	393.97	-0.0313569	0.610964	-0.0513236	0.959068	0.0181508	0.995906	0.00178163		AFUN001459	413.3	-0.241788	0.176195	-1.37227	0.169979	0.769604	1	0
AFUN001460	4085844	4091171	5328	others	No	cDNA	AFUN001460	others	protein phosphatase 1D (formerly 2C) [Source:Projected from Anopheles gambiae (AGAP004291) VB Community Annotation]	NA	No	AFUN001460	863.493	0.356001	0.147086	2.42035	0.0155054	1.80952	0.0391408	1.40737	x	AFUN001460	631.101	0.0394116	0.584109	0.067473	0.946205	0.0240147	0.994196	0.00252795		AFUN001460	786.207	0.169232	0.171198	0.988516	0.3229	0.490932	1	0
AFUN001461	4082847	4085746	2900	others	No	cDNA	AFUN001461	others	Leucine-zipper-like transcriptional regulator [Source:Projected from Anopheles gambiae (AGAP004292) VB Community Annotation]	NA	No	AFUN001461	323.809	0.356799	0.119479	2.98628	0.00282394	2.54914	0.00926528	2.03314	x	AFUN001461	231.85	0.280512	0.666373	0.420954	0.673788	0.171476	0.982495	0.00766973		AFUN001461	300.168	0.135219	0.162283	0.833226	0.404717	0.392848	1	0
AFUN001462	4079014	4082551	3538	others	No	cDNA	AFUN001462	others	SKA2 domain-containing protein [Source:UniProtKB/TrEMBL;Acc:A0A182R5L9]	NA	No	AFUN001462	582.11	0.724458	0.152219	4.75931	1.9426e-06	5.71162	1.48017e-05	4.82969	x	AFUN001462	431.888	0.910769	0.60593	1.50309	0.132815	0.876753	0.684371	0.164708		AFUN001462	566.812	0.011741	0.168645	0.0696194	0.944497	0.0247996	1	0
AFUN001463	4075138	4078719	3582	others	No	cDNA	Ubqn	others	Ubiquilin [Source:UniProtKB/TrEMBL;Acc:A0A182R5M0]	Ubqn	No	AFUN001463	2181.11	0.0910445	0.162202	0.561304	0.574591	0.240642	0.680477	0.167187		AFUN001463	1547.44	0.165042	0.588874	0.280267	0.779272	0.108311	0.985365	0.00640266		AFUN001463	2000.85	0.093919	0.232952	0.40317	0.686823	0.163155	1	0
AFUN001465	4072889	4073973	1085	others	No	cDNA	AFUN001465	others	DTW domain-containing protein [Source:Projected from Anopheles gambiae (AGAP004295) VB Community Annotation]	NA	No	AFUN001465	63.9542	1.61757	0.386323	4.18711	2.82532e-05	4.54893	0.000164329	3.78429	x	AFUN001465	53.2114	0.92536	0.984452	0.939975	0.347231	0.459382	0.884113	0.0534923		AFUN001465	63.5199	-0.000520849	0.364771	-0.00142788	0.998861	0.000495066	1	0
AFUN001466	4072289	4072874	586	others	No	cDNA	AFUN001466	others	signal peptidase complex subunit [Source:Projected from Anopheles gambiae (AGAP004296) VB Community Annotation]	NA	No	AFUN001466	162.538	0.0295356	0.219275	0.134696	0.892852	0.0492205	0.929939	0.0315456		AFUN001466	139.194	-0.0206393	0.736056	-0.0280404	0.97763	0.00982551	0.997711	0.000995067		AFUN001466	149.611	-0.134564	0.260161	-0.517234	0.604993	0.21825	1	0
AFUN001467	4069478	4072046	2569	others	No	cDNA	AFUN001467	others	Epimerase domain-containing protein [Source:UniProtKB/TrEMBL;Acc:A0A182R5M4]	NA	No	AFUN001467	447.266	0.176141	0.216179	0.814794	0.41519	0.381753	0.53973	0.267823		AFUN001467	361.562	0.102089	0.619435	0.164811	0.869093	0.0609337	0.988212	0.00514969		AFUN001467	414.018	-0.0455618	0.255988	-0.177984	0.858735	0.0661406	1	0
AFUN001468	4064174	4067627	3454	others	No	cDNA	AFUN001468	others	calcineurin beta subunit [Source:Projected from Anopheles gambiae (AGAP004298) VB Community Annotation]	NA	No	AFUN001468	1248.14	0.154665	0.113677	1.36057	0.173649	0.760327	0.278463	0.555233		AFUN001468	968.105	0.121119	0.587746	0.206074	0.836733	0.0774129	0.985365	0.00640266		AFUN001468	1151.94	0.00194559	0.18567	0.0104788	0.991639	0.00364626	1	0
AFUN001469	4059557	4061660	2104	others	No	cDNA	AFUN001469	others	helix-loop-helix protein hen [Source:Projected from Anopheles gambiae (AGAP004299) VB Community Annotation]	NA	No	AFUN001469	7.96137	0.282615	0.633173	0.446348	0.655346	0.183529	0.750622	0.124579		AFUN001469	5.43728	0.455753	2.53887	0.17951	0.857537	0.0667471	0.987156	0.00561427		AFUN001469	7.43879	0.136295	0.803809	0.169561	0.865356	0.0628054	1	0
AFUN001470	4056807	4058647	1841	others	No	cDNA	AFUN001470	others	Atx10homo_assoc domain-containing protein [Source:UniProtKB/TrEMBL;Acc:A0A182R5M7]	NA	No	AFUN001470	242.659	-0.410595	0.17032	-2.41073	0.0159208	1.79803	0.0399288	1.39871	x	AFUN001470	202.542	-0.532317	0.682233	-0.780257	0.43524	0.361271	0.923499	0.0345635		AFUN001470	210.775	-0.0629325	0.208785	-0.301423	0.763092	0.117423	1	0
AFUN001471	4055524	4056849	1326	others	No	cDNA	AFUN001471	others	phosphatidylinositol glycan, class K [Source:Projected from Anopheles gambiae (AGAP004301) VB Community Annotation]	NA	No	AFUN001471	76.5574	0.75733	0.234943	3.22346	0.00126652	2.89739	0.00460138	2.33711	x	AFUN001471	60.0738	0.468397	0.94183	0.497327	0.618959	0.208338	0.969848	0.0132962		AFUN001471	72.8707	0.0557245	0.278375	0.200178	0.841341	0.0750278	1	0
AFUN001472	4031485	4054786	23302	others	No	cDNA	AFUN001472	others	zf-AD domain-containing protein [Source:UniProtKB/TrEMBL;Acc:A0A182R5M9]	NA	No	AFUN001472	541.522	0.386841	0.180454	2.14371	0.0320564	1.49409	0.0714046	1.14627		AFUN001472	408.907	0.312977	0.621551	0.503542	0.614583	0.211419	0.969848	0.0132962		AFUN001472	506.443	0.0513223	0.232334	0.220898	0.825172	0.0834556	1	0
AFUN001473	4021776	4028782	7007	others	No	cDNA	AFUN001473	others	Integrin alpha-ps [Source:Projected from Anopheles gambiae (AGAP004303) VB Community Annotation]	NA	No	AFUN001473	885.111	0.0837777	0.510949	0.163965	0.869759	0.0606012	0.912821	0.0396143		AFUN001473	637.427	-0.527515	0.644074	-0.819029	0.41277	0.384292	0.917446	0.0374196		AFUN001473	763.227	0.32249	0.604726	0.533283	0.593838	0.226332	1	0
AFUN001474	3991469	4019919	28451	others	No	cDNA	AFUN001474	others	ubiquitin-like [Source:Projected from Anopheles gambiae (AGAP013294) VB Community Annotation]	NA	No	AFUN001474	2427.57	-1.45798	0.189292	-7.70227	1.33671e-14	13.874	4.01423e-13	12.3964	x	AFUN001474	2196.2	-1.87777	0.546283	-3.43735	0.000587442	3.23103	0.0150002	1.8239	x	AFUN001474	1761.59	0.0251093	0.153658	0.16341	0.870196	0.0603831	1	0
AFUN001475	3989510	3990853	1344	others	No	cDNA	AFUN001475	others	aprataxin [Source:Projected from Anopheles gambiae (AGAP004307) VB Community Annotation]	NA	No	AFUN001475	81.5282	-0.737209	0.395165	-1.86557	0.0621009	1.2069	0.122769	0.910913		AFUN001475	54.2963	0.0220443	1.00488	0.0219372	0.982498	0.0076683	0.998186	0.000788662		AFUN001475	73.5267	-0.0766217	0.469364	-0.163246	0.870325	0.0603185	1	0
AFUN001477	3960253	3967254	7002	others	No	cDNA	AFUN001477	others	phosphopantothenate-cysteine ligase [Source:Projected from Anopheles gambiae (AGAP004311) VB Community Annotation]	NA	No	AFUN001477	939.108	-0.284767	0.090645	-3.14157	0.00168046	2.77457	0.00585844	2.23222	x	AFUN001477	780.156	-0.0779848	0.582306	-0.133924	0.893463	0.0489236	0.9911	0.00388266		AFUN001477	856.39	-0.188064	0.142206	-1.32248	0.186008	0.730467	1	0
AFUN001478	3957416	3960113	2698	others	No	cDNA	AFUN001478	others	CLASP_N domain-containing protein [Source:UniProtKB/TrEMBL;Acc:A0A182R5N5]	NA	No	AFUN001478	23.9009	0.196959	0.468921	0.420026	0.674466	0.17104	0.766155	0.115683		AFUN001478	23.4105	0.166351	1.35547	0.122725	0.902325	0.0446372	0.991504	0.00370554		AFUN001478	22.7919	-0.354887	0.562903	-0.630458	0.528395	0.277041	1	0
AFUN001479	3956353	3957378	1026	others	No	cDNA	AFUN001479	others	gustatory receptor [Source:Projected from Anopheles gambiae (AGAP029199) VB Community Annotation]	NA	No	AFUN001479	5.35716	-0.327654	1.00756	-0.325195	0.745034	0.127824	0.8215	0.0853923		AFUN001479	6.81575	0.587402	2.33439	0.25163	0.801327	0.09619	0.985365	0.00640266		AFUN001479	5.62224	-0.99482	1.19881	-0.829841	0.406628	0.390802	1	0
AFUN001481	3950040	3952857	2818	others	No	cDNA	AFUN001481	others	unspecified product	NA	No	AFUN001481	1021.32	-0.565993	0.261192	-2.16696	0.0302379	1.51945	0.0680887	1.16693		AFUN001481	881.21	-0.842829	0.575203	-1.46527	0.142847	0.84513	0.703386	0.152806		AFUN001481	855.402	-0.0394676	0.291609	-0.135344	0.89234	0.0494697	1	0
AFUN001482	3946589	3947336	748	others	No	cDNA	AFUN001482	others	unspecified product	NA	No	AFUN001482	157.847	-1.74892	0.735433	-2.37808	0.0174031	1.75937	0.0430374	1.36615	x	AFUN001482	84.5932	-0.122599	0.953828	-0.128534	0.897726	0.046856	0.991504	0.00370554		AFUN001482	138.296	-0.272037	0.844781	-0.322021	0.747437	0.126425	1	0
AFUN001484	3933784	3935513	1730	others	No	cDNA	AFUN001484	others	P53 domain-containing protein [Source:UniProtKB/TrEMBL;Acc:A0A182R5P0]	NA	No	AFUN001484	51.499	0.998946	0.350862	2.84712	0.00441169	2.3554	0.013531	1.86867	x	AFUN001484	43.7953	0.862044	1.09777	0.785265	0.432298	0.364216	0.923499	0.0345635		AFUN001484	51.1505	-0.0958673	0.449606	-0.213225	0.831151	0.0803199	1	0
AFUN001485	3863915	3933726	69812	others	No	cDNA	AFUN001485	others	unspecified product	NA	No	AFUN001485	2037.23	0.561444	0.166531	3.37141	0.000747832	3.1262	0.00291527	2.53532	x	AFUN001485	1469.44	0.336787	0.556095	0.60563	0.544761	0.263794	0.95534	0.0198421		AFUN001485	1898.39	0.153852	0.19994	0.76949	0.441602	0.354969	1	0
AFUN001486	3862648	3863537	890	others	No	cDNA	AFUN001486	others	Peptidyl-prolyl cis-trans isomerase [Source:UniProtKB/TrEMBL;Acc:A0A182R5P2]	NA	No	AFUN001486	42.27	-1.21019	0.313878	-3.85561	0.000115443	3.93763	0.000570424	3.2438	x	AFUN001486	31.1152	-0.575762	1.19068	-0.483558	0.6287	0.201557	0.971877	0.0123886		AFUN001486	36.3099	-0.232256	0.397112	-0.584864	0.558639	0.252869	1	0
AFUN001487	3860185	3862615	2431	others	No	cDNA	AFUN001487	others	CPL domain-containing protein [Source:UniProtKB/TrEMBL;Acc:A0A182R5P3]	NA	No	AFUN001487	487.539	-1.10444	0.114498	-9.64599	5.11131e-22	21.2915	3.52625e-20	19.4527	x	AFUN001487	367.393	-0.932742	0.645025	-1.44606	0.148161	0.829265	0.707313	0.150388		AFUN001487	403.021	-0.0636757	0.199591	-0.319031	0.749703	0.125111	1	0
AFUN001488	3840552	3859752	19201	others	No	cDNA	AFUN001488	others	unspecified product	NA	No	AFUN001488	467.897	1.35737	0.201828	6.72537	1.75143e-11	10.7566	3.21171e-10	9.49326	x	AFUN001488	347.039	1.50884	0.63349	2.38178	0.0172291	1.76374	0.21825	0.661045		AFUN001488	470.523	0.028004	0.238793	0.117273	0.906644	0.0425634	1	0
AFUN001489	3838260	3839987	1728	others	No	cDNA	AFUN001489	others	Protein yellow [Source:Projected from Anopheles gambiae (AGAP004324) VB Community Annotation]	NA	No	AFUN001489	1.30901	-1.79253	1.50548	-1.19067	0.233783	0.631187	0.350867	0.454858		AFUN001489	1.27945	-2.39067	5.35279	-0.44662	0.655149	0.18366	1	0		AFUN001489	0.841928	-0.0223539	2.37977	-0.00939331	0.992505	0.00326715	1	0
AFUN001490	3830968	3835930	4963	others	No	cDNA	AFUN001490	others	unspecified product	NA	No	AFUN001490	34.5603	0.105724	0.332091	0.318359	0.750212	0.124816	0.82493	0.083583		AFUN001490	24.8116	-0.471591	1.31015	-0.359953	0.718883	0.143342	0.984947	0.00658717		AFUN001490	29.9754	0.330277	0.433787	0.761381	0.446429	0.350247	1	0
AFUN001492	3814396	3825452	11057	others	No	cDNA	AFUN001492	others	unspecified product	NA	No	AFUN001492	2353.45	0.210848	0.148736	1.4176	0.156308	0.806019	0.256487	0.590934		AFUN001492	1713.63	0.334154	0.611629	0.546334	0.584837	0.232965	0.963704	0.0160563		AFUN001492	2194.58	0.0436895	0.252882	0.172766	0.862835	0.0640721	1	0
AFUN001493	3785518	3805228	19711	others	No	cDNA	AFUN001493	others	unspecified product	NA	No	AFUN001493	2762.25	-0.346695	0.093133	-3.72258	0.000197196	3.7051	0.000912834	3.03961	x	AFUN001493	2110.09	-0.131046	0.580436	-0.225772	0.821379	0.0854564	0.985365	0.00640266		AFUN001493	2486.62	-0.0674956	0.183403	-0.368018	0.71286	0.146996	1	0
AFUN001495	4378518	4382227	3710	others	No	cDNA	AFUN001495	others	Protein unc-45 homolog B [Source:Projected from Anopheles gambiae (AGAP003727) VB Community Annotation]	NA	No	AFUN001495	314.194	-0.0638376	0.459613	-0.138894	0.889534	0.0508376	0.927391	0.0327372		AFUN001495	263.251	-0.110191	0.784818	-0.140403	0.888341	0.0514201	0.990097	0.00432229		AFUN001495	285.717	-0.106377	0.596646	-0.178292	0.858494	0.0662629	1	0
AFUN001496	4376282	4378276	1995	others	No	cDNA	AFUN001496	others	unspecified product	NA	No	AFUN001496	145.912	-0.302349	0.205808	-1.46908	0.141811	0.84829	0.237961	0.623494		AFUN001496	111.332	-0.0591868	0.776202	-0.0762519	0.939219	0.0272333	0.994196	0.00252795		AFUN001496	132.219	-0.0760491	0.250376	-0.30374	0.761326	0.118429	1	0
AFUN001497	4376401	4377078	678	others	No	cDNA	AFUN001497	others	J domain-containing protein [Source:UniProtKB/TrEMBL;Acc:A0A182R5Q3]	NA	No	AFUN001497	47.9867	-1.91145	0.410311	-4.65855	3.1845e-06	5.49696	2.30277e-05	4.63775	x	AFUN001497	46.6966	-2.19571	1.04954	-2.09208	0.0364315	1.43852	0.357796	0.446364		AFUN001497	32.8049	-0.161988	0.526696	-0.307555	0.758421	0.12009	1	0
AFUN001498	4369027	4373230	4204	others	No	cDNA	AFUN001498	others	Neutral ceramidase [Source:UniProtKB/TrEMBL;Acc:A0A182R5Q4]	NA	No	AFUN001498	63.635	0.179343	0.594062	0.301893	0.762733	0.117627	0.833337	0.0791795		AFUN001498	37.2156	-1.73142	1.13178	-1.52981	0.126063	0.899412	0.672451	0.172339		AFUN001498	48.9946	1.28431	0.702657	1.82779	0.0675815	1.17017	1	0
AFUN001499	4367466	4368800	1335	others	No	cDNA	AFUN001499	others	VPS37 C-terminal domain-containing protein [Source:UniProtKB/TrEMBL;Acc:A0A182R5Q5]	NA	No	AFUN001499	205.841	-0.68379	0.271626	-2.5174	0.0118225	1.92729	0.0312016	1.50582	x	AFUN001499	192.56	-0.728936	0.707563	-1.03021	0.302913	0.518682	0.862132	0.0644263		AFUN001499	175.265	-0.265099	0.328384	-0.807283	0.419503	0.377265	1	0
AFUN001500	4366490	4367278	789	others	No	cDNA	AFUN001500	others	unspecified product	NA	No	AFUN001500	300.855	-0.356849	0.168069	-2.12323	0.0337342	1.47193	0.0744251	1.12828		AFUN001500	255.375	0.0647737	0.662432	0.0977816	0.922106	0.0352193	0.992677	0.00319214		AFUN001500	279.036	-0.285308	0.220332	-1.2949	0.195356	0.709173	1	0
AFUN001501	4361838	4366479	4642	others	No	cDNA	AFUN001501	others	alpha-tocopherol transfer protein-like protein [Source:Projected from Anopheles gambiae (AGAP003733) VB Community Annotation]	NA	No	AFUN001501	324.808	-0.623759	0.203479	-3.06548	0.00217323	2.66289	0.00736118	2.13305	x	AFUN001501	247.418	-1.07287	0.672153	-1.59617	0.110452	0.956827	0.639412	0.194219		AFUN001501	264.287	0.22137	0.258964	0.85483	0.392645	0.405999	1	0
AFUN001502	4348003	4358301	10299	others	No	cDNA	AFUN001502	others	CRAL-TRIO domain-containing protein [Source:UniProtKB/TrEMBL;Acc:A0A182R5Q8]	NA	No	AFUN001502	164.947	0.164655	0.309507	0.53199	0.594733	0.225678	0.69792	0.156194		AFUN001502	151.651	0.214964	0.732017	0.29366	0.769017	0.114064	0.985365	0.00640266		AFUN001502	156.874	-0.26643	0.366239	-0.727477	0.466934	0.330745	1	0
AFUN001507	4254755	4255855	1101	others	No	cDNA	AFUN001507	others	ESF2/ABP1 family protein [Source:Projected from Anopheles gambiae (AGAP003737) VB Community Annotation]	NA	No	AFUN001507	203.446	-1.16405	0.226612	-5.13677	2.795e-07	6.55362	2.58591e-06	5.58739	x	AFUN001507	156.117	-0.935873	0.722458	-1.2954	0.195182	0.709561	0.770514	0.113219		AFUN001507	168.25	-0.107099	0.289311	-0.370184	0.711245	0.147981	1	0
AFUN001510	4224737	4235367	10631	others	No	cDNA	AFUN001510	others	unspecified product	NA	No	AFUN001510	213.578	0.00126126	0.330045	0.00382147	0.996951	0.00132622	0.997967	0.00088364		AFUN001510	213.169	0.0961677	0.757539	0.126947	0.898982	0.046249	0.991504	0.00370554		AFUN001510	202.634	-0.408487	0.433678	-0.941912	0.346238	0.460626	1	0
AFUN001511	4221269	4223496	2228	others	No	cDNA	AFUN001511	others	BHLH domain-containing protein [Source:UniProtKB/TrEMBL;Acc:A0A182R5R7]	NA	No	AFUN001511	45.5275	0.42438	0.32133	1.3207	0.186601	0.729086	0.295151	0.529956		AFUN001511	37.2904	0.610034	1.14207	0.534149	0.593238	0.226771	0.964533	0.015683		AFUN001511	44.1072	-0.120231	0.419838	-0.286376	0.77459	0.110928	1	0
AFUN001514	4213179	4217516	4338	others	No	cDNA	AFUN001514	others	regulator of chromosome condensation [Source:Projected from Anopheles gambiae (AGAP003742) VB Community Annotation]	NA	No	AFUN001514	2458.17	0.460137	0.0888341	5.17973	2.22208e-07	6.65324	2.09456e-06	5.67891	x	AFUN001514	1788.29	0.377309	0.589968	0.639542	0.52247	0.281938	0.950669	0.0219708		AFUN001514	2299.77	0.103098	0.198644	0.519009	0.603754	0.21914	1	0
AFUN001515	4210476	4212964	2489	others	No	cDNA	AFUN001515	others	HAUS augmin-like complex subunit [Source:Projected from Anopheles gambiae (AGAP003743) VB Community Annotation]	NA	No	AFUN001515	181.708	0.503086	0.295969	1.6998	0.0891694	1.04978	0.164508	0.783812		AFUN001515	101.301	0.894683	0.801495	1.11627	0.264308	0.57789	0.83681	0.0773731		AFUN001515	169.865	0.37169	0.280242	1.32632	0.184735	0.73345	1	0
AFUN001516	4206187	4208254	2068	others	No	cDNA	AFUN001516	others	Ring finger protein [Source:Projected from Anopheles gambiae (AGAP003744) VB Community Annotation]	NA	No	AFUN001516	159.405	0.199191	0.276393	0.720682	0.471105	0.326882	0.591861	0.22778		AFUN001516	95.8459	0.0566766	0.810424	0.0699345	0.944246	0.0249149	0.994196	0.00252795		AFUN001516	142.77	0.398816	0.326763	1.22051	0.222272	0.653114	1	0
AFUN001517	4202057	4206008	3952	others	No	cDNA	AFUN001517	others	unspecified product	NA	No	AFUN001517	596.855	1.00988	0.218528	4.62129	3.81354e-06	5.41867	2.70101e-05	4.56847	x	AFUN001517	356.118	1.03257	0.63525	1.62546	0.104065	0.982695	0.623672	0.205044		AFUN001517	566.723	0.360778	0.244634	1.47477	0.140274	0.853021	1	0
AFUN001520	3486628	3487211	584	others	No	cDNA	AFUN001520	others	unspecified product	NA	No	AFUN001520	0.209255	-1.61446	3.46572	-0.465838	0.641331	0.192917	1	0		AFUN001520	0.482674	-2.75089	5.85998	-0.469437	0.638757	0.194664	1	0		AFUN001520	0	NA	NA	NA	NA	#VALUE!	1	0
AFUN001521	3493138	3497013	3876	others	No	cDNA	AFUN001521	others	unspecified product	NA	No	AFUN001521	7.16573	-0.517609	1.74202	-0.297132	0.766366	0.115564	0.835516	0.0780452		AFUN001521	5.91995	0.0402784	2.43623	0.0165331	0.986809	0.00576684	0.999408	0.000257281		AFUN001521	6.61484	-0.300744	2.0015	-0.15026	0.88056	0.0552411	1	0
AFUN001523	3507253	3540844	33592	CPs	Yes	cDNA	AFUN001523	others	cuticular protein [Source:Projected from Anopheles gambiae (AGAP003751) VB Community Annotation]	NA	No	AFUN001523	484.765	-0.851125	0.122114	-6.96994	3.17068e-12	11.4988	6.51649e-11	10.186	x	AFUN001523	352.962	-0.761339	0.619577	-1.22881	0.219145	0.659269	0.794258	0.100038		AFUN001523	408.162	0.0372187	0.150825	0.246768	0.805088	0.0941569	1	0		Metabolism
AFUN001524	3540939	3544699	3761	others	No	cDNA	AFUN001524	others	unspecified product	NA	No	AFUN001524	3.66116	-5.2473	1.26536	-4.14688	3.37043e-05	4.47231	0.000192469	3.71564	x	AFUN001524	2.00346	-3.19351	4.41236	-0.723765	0.46921	0.328633	1	0		AFUN001524	2.51482	-1.37792	2.18557	-0.630462	0.528392	0.277044	1	0
AFUN001527	3585737	3586267	531	others	No	cDNA	AFUN001527	others	unspecified product	NA	No	AFUN001527	0.292468	-2.11311	3.42714	-0.61658	0.537512	0.269612	1	0		AFUN001527	0.482674	-2.75089	5.85998	-0.469437	0.638757	0.194664	1	0		AFUN001527	0.0683209	0	4.08048	0	1	0	1	0
AFUN001529	3632742	3659441	26700	others	No	cDNA	AFUN001529	others	PEHE domain-containing protein [Source:UniProtKB/TrEMBL;Acc:A0A182R5T1]	NA	No	AFUN001529	2053.79	1.12112	0.189715	5.90951	3.43136e-09	8.46453	4.41031e-08	7.35553	x	AFUN001529	1583.47	1.1498	0.634139	1.81316	0.069807	1.1561	0.525611	0.279336		AFUN001529	2041.55	-0.00767398	0.30779	-0.0249325	0.980109	0.00872572	1	0
AFUN001530	3669721	3671722	2002	others	No	cDNA	AFUN001530	others	BHLH domain-containing protein [Source:UniProtKB/TrEMBL;Acc:A0A182R5T2]	NA	No	AFUN001530	15.9303	-1.38332	0.53585	-2.58154	0.00983597	2.00718	0.0267554	1.57259	x	AFUN001530	7.82225	-2.03492	2.45142	-0.8301	0.406482	0.390958	0.914384	0.0388715		AFUN001530	12.0783	0.955486	0.916656	1.04236	0.297244	0.526887	1	0
AFUN001537	3456643	3459806	3164	others	No	cDNA	AFUN001537	others	CHK domain-containing protein [Source:UniProtKB/TrEMBL;Acc:A0A182R5T9]	NA	No	AFUN001537	801.092	-0.23571	0.203467	-1.15847	0.246672	0.60788	0.366164	0.436325		AFUN001537	570.312	-0.641063	0.596644	-1.07445	0.282622	0.548794	0.852291	0.069412		AFUN001537	682.618	0.278601	0.248679	1.12032	0.262577	0.580744	1	0
AFUN001538	3460006	3461773	1768	others	No	cDNA	RpS2	others	40S ribosomal protein S2 [Source:UniProtKB/TrEMBL;Acc:A0A182R5U0]	RpS2	No	AFUN001538	6772.93	0.815352	0.105674	7.71569	1.20325e-14	13.9196	3.65646e-13	12.4369	x	AFUN001538	5007.55	0.622752	0.538327	1.15683	0.247343	0.606701	0.821146	0.0855798		AFUN001538	6467.11	0.103376	0.124078	0.833151	0.404759	0.392803	1	0
AFUN001540	3462572	3470142	7571	others	No	cDNA	AFUN001540	others	importin beta-3 [Source:Projected from Anopheles gambiae (AGAP003769) VB Community Annotation]	NA	No	AFUN001540	9508.19	-0.105056	0.158936	-0.660995	0.508616	0.29361	0.62472	0.204315		AFUN001540	7557.44	-0.286428	0.582107	-0.492053	0.622682	0.205734	0.969848	0.0132962		AFUN001540	8454.43	0.0202	0.239706	0.08427	0.932842	0.030192	1	0
AFUN001541	3470515	3471272	758	others	No	cDNA	mRpL51	others	39S ribosomal protein L51, mitochondrial	mRpL51	No	AFUN001541	158.082	0.583274	0.231687	2.51751	0.0118188	1.92743	0.0312016	1.50582	x	AFUN001541	145.079	0.235749	0.737885	0.319493	0.749353	0.125314	0.984955	0.00658373		AFUN001541	150.622	-0.146759	0.206149	-0.711909	0.476521	0.321918	1	0
AFUN001542	3471433	3473211	1779	others	No	cDNA	AFUN001542	others	C2H2-type domain-containing protein [Source:UniProtKB/TrEMBL;Acc:A0A182R5U4]	NA	No	AFUN001542	136.016	0.0685575	0.224118	0.305899	0.759682	0.119368	0.831331	0.0802258		AFUN001542	118.476	0.338558	0.76956	0.439938	0.659982	0.180468	0.979146	0.00915236		AFUN001542	129.908	-0.256326	0.27685	-0.925869	0.354514	0.450366	1	0
AFUN001559	4768301	4777952	9652	others	No	cDNA	AFUN001559	others	annexin B9 [Source:Projected from Anopheles gambiae (AGAP003790) VB Community Annotation]	NA	No	AFUN001559	2971.07	0.590179	0.273848	2.15513	0.0311513	1.50652	0.0697638	1.15637		AFUN001559	2444.5	0.834091	0.596717	1.3978	0.162173	0.790022	0.733494	0.134603		AFUN001559	2927.04	-0.152551	0.352928	-0.432245	0.665564	0.17681	1	0
AFUN001560	4767144	4768281	1138	others	No	cDNA	AFUN001560	others	RECA_2 domain-containing protein [Source:UniProtKB/TrEMBL;Acc:A0A182R5W4]	NA	No	AFUN001560	25.2892	0.249547	0.431166	0.578772	0.562743	0.24969	0.670895	0.173346		AFUN001560	16.4804	0.265131	1.56128	0.169816	0.865154	0.0629063	0.988212	0.00514969		AFUN001560	23.1777	0.256851	0.547659	0.468998	0.639071	0.194451	1	0
AFUN001561	4760435	4762994	2560	others	No	cDNA	AFUN001561	others	Mannosyltransferase [Source:UniProtKB/TrEMBL;Acc:A0A182R5W5]	NA	No	AFUN001561	210.668	1.37326	0.188107	7.3004	2.86909e-13	12.5423	6.94843e-12	11.1581	x	AFUN001561	160.607	1.27849	0.833283	1.53428	0.12496	0.903229	0.671446	0.172989		AFUN001561	210.45	0.0217954	0.366983	0.0593909	0.952641	0.0210708	1	0
AFUN001562	4757372	4760146	2775	others	No	cDNA	AFUN001562	others	unspecified product	NA	No	AFUN001562	464.373	1.21382	0.224921	5.39664	6.78992e-08	7.16814	7.00564e-07	6.15455	x	AFUN001562	317.283	0.894242	0.678837	1.31732	0.187733	0.726459	0.764072	0.116866		AFUN001562	446.126	0.230488	0.31073	0.741765	0.45823	0.338917	1	0
AFUN001564	4735331	4737703	2373	others	No	cDNA	AFUN001564	others	unspecified product	NA	No	AFUN001564	768.57	-0.268099	0.163832	-1.63642	0.101751	0.99246	0.183296	0.736847		AFUN001564	701.648	-0.33892	0.587771	-0.576618	0.564198	0.248569	0.961166	0.0172017		AFUN001564	687.023	-0.216391	0.176325	-1.22723	0.219736	0.658099	1	0
AFUN001565	4734604	4735294	691	others	No	cDNA	AFUN001565	others	Cyclin-dependent kinases regulatory subunit [Source:UniProtKB/TrEMBL;Acc:A0A182R5W9]	NA	No	AFUN001565	23.0883	6.90076	1.25119	5.51535	3.4808e-08	7.45832	3.78411e-07	6.42204	x	AFUN001565	21.5885	5.46517	1.97574	2.76614	0.00567237	2.24624	0.0957294	1.01895		AFUN001565	26.4644	-0.265578	0.48997	-0.54203	0.587798	0.230772	1	0
AFUN001566	4713104	4732197	19094	others	No	cDNA	AFUN001566	others	protein tipE [Source:Projected from Anopheles gambiae (AGAP003797) VB Community Annotation]	NA	No	AFUN001566	186.266	-0.0072238	0.28881	-0.0250123	0.980045	0.00875393	0.988012	0.00523764		AFUN001566	141.049	-0.338059	0.755981	-0.447179	0.654746	0.183927	0.977086	0.0100671		AFUN001566	164.221	0.148683	0.360754	0.412147	0.680232	0.167343	1	0
AFUN001567	4691820	4694993	3174	others	No	cDNA	AFUN001567	others	growth hormone regulated TBC protein 1b [Source:Projected from Anopheles gambiae (AGAP003798) VB Community Annotation]	NA	No	AFUN001567	121.549	0.488224	0.23841	2.04783	0.0405763	1.39173	0.0866738	1.06211		AFUN001567	99.2604	0.437301	0.805962	0.542582	0.587417	0.231053	0.963704	0.0160563		AFUN001567	115.989	-0.073287	0.285819	-0.25641	0.797634	0.0981964	1	0
AFUN001568	4690804	4691698	895	others	No	cDNA	AFUN001568	others	golgi SNAP receptor complex member [Source:Projected from Anopheles gambiae (AGAP003800) VB Community Annotation]	NA	No	AFUN001568	71.8761	0.421103	0.282082	1.49284	0.13548	0.868125	0.229688	0.638863		AFUN001568	53.2591	0.520318	0.978736	0.531622	0.594988	0.225492	0.965751	0.0151349		AFUN001568	68.1562	0.0294059	0.342207	0.0859302	0.931522	0.0308069	1	0
AFUN001570	4666211	4667958	1748	others	No	cDNA	AFUN001570	others	unspecified product	NA	No	AFUN001570	5.32562	0.0185234	0.871426	0.0212564	0.983041	0.00742832	0.989829	0.0044399		AFUN001570	8.02136	-0.557338	2.15344	-0.258813	0.795779	0.0992073	0.985365	0.00640266		AFUN001570	4.8213	-0.712446	0.838969	-0.849191	0.395775	0.402552	1	0
AFUN001572	4663269	4665651	2383	others	No	cDNA	AFUN001572	others	EF-hand domain (C-terminal) containing [Source:Projected from Anopheles gambiae (AGAP003805) VB Community Annotation]	NA	No	AFUN001572	11.8577	-0.843808	0.716226	-1.17813	0.238744	0.622067	0.356758	0.447626		AFUN001572	9.32323	-0.63738	2.0177	-0.315894	0.752083	0.123734	0.985365	0.00640266		AFUN001572	10.126	-0.137615	0.942276	-0.146046	0.883885	0.0536041	1	0
AFUN001573	4541465	4652083	110619	others	No	cDNA	AFUN001573	others	unspecified product	NA	No	AFUN001573	853.065	0.272131	0.255894	1.06345	0.287577	0.541245	0.410858	0.386308		AFUN001573	586.9	0.125488	0.602961	0.20812	0.835135	0.0782431	0.985365	0.00640266		AFUN001573	777.702	0.207549	0.313078	0.662932	0.507374	0.294672	1	0
AFUN001574	4606921	4608148	1228	others	No	cDNA	AFUN001574	others	serine-type enodpeptidase [Source:Projected from Anopheles gambiae (AGAP003807) VB Community Annotation]	NA	No	AFUN001574	1.57613	0.895522	1.26906	0.705657	0.480401	0.318396	0.599703	0.222064		AFUN001574	1.25642	3.84067	6.00253	0.639842	0.522275	0.282101	1	0		AFUN001574	1.73992	-0.47512	1.40524	-0.338106	0.735283	0.133545	1	0
AFUN001575	4538550	4540502	1953	others	No	cDNA	AFUN001575	others	unspecified product	NA	No	AFUN001575	7.01445	-1.04515	1.29659	-0.806079	0.420197	0.376547	0.544907	0.263677		AFUN001575	5.36022	-2.0317	2.60347	-0.780383	0.435165	0.361346	0.923499	0.0345635		AFUN001575	5.08477	0.580425	1.67448	0.34663	0.728869	0.13735	1	0
AFUN001576	4779352	4787821	8470	others	No	cDNA	AFUN001576	others	sinuous [Source:Projected from Anopheles gambiae (AGAP003809) VB Community Annotation]	NA	No	AFUN001576	120.902	1.18414	0.260339	4.54846	5.40401e-06	5.26728	3.71213e-05	4.43038	x	AFUN001576	103.096	0.945561	0.798358	1.18438	0.236262	0.626606	0.812028	0.0904291		AFUN001576	120.801	-0.100774	0.278432	-0.361933	0.717402	0.144237	1	0
AFUN001577	4784271	4785023	753	others	No	cDNA	AFUN001577	others	PfkB domain-containing protein [Source:UniProtKB/TrEMBL;Acc:A0A182R5Y1]	NA	No	AFUN001577	18.4553	0.571495	0.477887	1.19588	0.231744	0.634992	0.348627	0.45764		AFUN001577	14.3758	-0.0160699	1.63997	-0.00979893	0.992182	0.00340878	0.999499	0.000217778		AFUN001577	16.8225	0.148483	0.56707	0.261843	0.793443	0.100485	1	0
AFUN001578	4793036	4796074	3039	others	No	cDNA	AFUN001578	others	unspecified product	NA	No	AFUN001578	224.333	-2.14318	0.245272	-8.73798	2.37314e-18	17.6247	1.13016e-16	15.9469	x	AFUN001578	133.662	-1.9688	0.769187	-2.55959	0.0104795	1.97966	0.15291	0.815565		AFUN001578	168.805	0.26626	0.30908	0.86146	0.388985	0.410068	1	0
AFUN001579	4796387	4797453	1067	others	No	cDNA	AFUN001579	others	unspecified product	NA	No	AFUN001579	93.1155	-3.44736	0.37387	-9.22074	2.95064e-20	19.5301	1.73389e-18	17.761	x	AFUN001579	60.3615	-2.78256	1.04212	-2.67009	0.00758307	2.12015	0.121515	0.915369		AFUN001579	64.7275	-0.266512	0.560561	-0.475439	0.634474	0.197586	1	0
AFUN001580	4797488	4799161	1674	others	No	cDNA	AFUN001580	others	DDE Tnp4 domain-containing protein [Source:UniProtKB/TrEMBL;Acc:A0A182R5Y4]	NA	No	AFUN001580	37.8729	1.469	0.343235	4.27985	1.87021e-05	4.72811	0.000113018	3.94685	x	AFUN001580	26.5661	2.48649	1.33377	1.86425	0.0622859	1.20561	0.495197	0.305222		AFUN001580	38.9905	0.045661	0.330449	0.138179	0.890099	0.0505616	1	0
AFUN001582	4826046	4827338	1293	others	No	cDNA	AFUN001582	others	Very-long-chain (3R)-3-hydroxyacyl-CoA dehydratase [Source:UniProtKB/TrEMBL;Acc:A0A182R5Y6]	NA	No	AFUN001582	58.5197	-0.184007	0.255176	-0.7211	0.470848	0.327119	0.591675	0.227917		AFUN001582	40.6862	-0.183384	1.07476	-0.170627	0.864517	0.0632266	0.988212	0.00514969		AFUN001582	52.0313	0.15722	0.333515	0.471405	0.637351	0.195621	1	0
AFUN001583	4827698	4828756	1059	others	No	cDNA	RpL30	others	60S ribosomal protein L30 [Source:UniProtKB/TrEMBL;Acc:A0A182R5Y7]	RpL30	No	AFUN001583	2933.79	1.979	0.316491	6.25294	4.02805e-10	9.3949	5.99884e-09	8.22193	x	AFUN001583	2208.41	1.12359	0.547485	2.05227	0.0401434	1.39639	0.376918	0.423753		AFUN001583	2900.74	0.158322	0.24592	0.643793	0.51971	0.284239	1	0
AFUN001584	4829369	4840431	11063	others	No	cDNA	AFUN001584	others	YTH domain-containing protein [Source:UniProtKB/TrEMBL;Acc:A0A182R5Y8]	NA	No	AFUN001584	3076.65	0.369632	0.113368	3.26046	0.00111233	2.95376	0.00410543	2.38664	x	AFUN001584	2220.93	0.427028	0.568628	0.75098	0.452665	0.344223	0.926952	0.0329425		AFUN001584	2886.67	0.0762803	0.175562	0.434491	0.663932	0.177876	1	0
AFUN001585	4840484	4851816	11333	others	No	cDNA	AFUN001585	others	DRN-tre [Source:Projected from Anopheles gambiae (AGAP003818) VB Community Annotation]	NA	No	AFUN001585	810.797	0.382887	0.144593	2.64804	0.00809591	2.09173	0.0226051	1.64579	x	AFUN001585	567.92	0.341831	0.601254	0.568529	0.569676	0.244372	0.962516	0.0165922		AFUN001585	753.057	0.14517	0.192324	0.75482	0.450357	0.346443	1	0
AFUN001586	4853133	4855021	1889	others	No	cDNA	AFUN001586	others	Glucosylceramidase [Source:Projected from Anopheles gambiae (AGAP001649) UniProtKB/TrEMBL;Acc:Q7PXX9]	NA	No	AFUN001586	36.3734	-0.803138	0.608947	-1.3189	0.187204	0.727686	0.295857	0.528918		AFUN001586	37.5583	-0.736354	1.14954	-0.640564	0.521806	0.282491	0.950473	0.0220604		AFUN001586	31.0132	-0.455193	0.740865	-0.614408	0.538946	0.268455	1	0
AFUN001587	4855666	4857482	1817	others	No	cDNA	AFUN001587	others	unspecified product	NA	No	AFUN001587	75.419	0.21613	0.361024	0.598659	0.5494	0.260111	0.659394	0.180855		AFUN001587	94.1559	1.10121	0.945844	1.16426	0.244317	0.612045	0.820165	0.0860986		AFUN001587	82.6618	-0.917575	0.518846	-1.76849	0.0769786	1.11363	1	0
AFUN001588	4858794	4859466	673	others	No	cDNA	AFUN001588	others	unspecified product	NA	No	AFUN001588	62.1852	0.598961	0.308702	1.94026	0.0523483	1.2811	0.106951	0.970816		AFUN001588	41.85	0.222009	1.06418	0.20862	0.834745	0.0784463	0.985365	0.00640266		AFUN001588	56.9988	0.30071	0.378188	0.795134	0.426536	0.370045	1	0
AFUN001589	4859837	4864216	4380	others	No	cDNA	AFUN001589	others	unspecified product	NA	No	AFUN001589	552.145	-0.161437	0.132382	-1.21948	0.222661	0.652356	0.337914	0.471194		AFUN001589	407.736	-0.00687612	0.608204	-0.0113056	0.99098	0.00393528	0.999499	0.000217778		AFUN001589	501.139	0.0064186	0.151362	0.0424056	0.966175	0.014944	1	0
AFUN001590	4864624	4870516	5893	others	No	cDNA	AFUN001590	others	RNA-binding protein FUS [Source:Projected from Anopheles gambiae (AGAP001645) VB Community Annotation]	NA	No	AFUN001590	620.791	0.625367	0.151051	4.1401	3.47156e-05	4.45948	0.000197801	3.70377	x	AFUN001590	445.613	0.67328	0.624625	1.0779	0.281081	0.551169	0.850362	0.070396		AFUN001590	592.294	0.0858677	0.210314	0.408284	0.683065	0.165538	1	0
AFUN001591	4870833	4874032	3200	others	No	cDNA	AFUN001591	others	dimethylargininase [Source:Projected from Anopheles gambiae (AGAP001644) VB Community Annotation]	NA	No	AFUN001591	196.362	-0.784444	0.267464	-2.93289	0.00335822	2.47389	0.0107706	1.96776	x	AFUN001591	194.491	-1.19845	0.721364	-1.66137	0.0966392	1.01485	0.609954	0.214703		AFUN001591	156.518	-0.147656	0.272434	-0.541986	0.587828	0.23075	1	0
AFUN001592	4874080	4879669	5590	others	No	cDNA	AFUN001592	others	unspecified product	NA	No	AFUN001592	832.131	-0.0427509	0.272273	-0.157015	0.875233	0.0578763	0.917729	0.0372855		AFUN001592	537.936	-0.0960641	0.606087	-0.158499	0.874064	0.0584569	0.988242	0.00513689		AFUN001592	741.027	0.271225	0.324308	0.836318	0.402976	0.394721	1	0
AFUN001593	4879735	4884399	4665	others	No	cDNA	AFUN001593	others	unspecified product	NA	No	AFUN001593	265.377	0.482069	0.273972	1.75955	0.0784839	1.10522	0.148376	0.828635		AFUN001593	215.444	0.708449	0.681614	1.03937	0.298633	0.524862	0.859124	0.0659441		AFUN001593	258.544	-0.130867	0.328726	-0.398104	0.690554	0.160803	1	0
AFUN001594	4884449	4887807	3359	others	No	cDNA	AFUN001594	others	polyA-binding protein interacting protein [Source:Projected from Anopheles gambiae (AGAP001639) VB Community Annotation]	NA	No	AFUN001594	1519.48	0.0965127	0.17342	0.556524	0.577852	0.238183	0.683515	0.165252		AFUN001594	1046.06	-0.0969376	0.568813	-0.170421	0.864679	0.063145	0.988212	0.00514969		AFUN001594	1360.03	0.226511	0.215124	1.05293	0.292372	0.534065	1	0
AFUN001595	4889805	4900880	11076	others	No	cDNA	AFUN001595	others	unspecified product	NA	No	AFUN001595	123.734	-0.508626	0.312741	-1.62635	0.103876	0.983485	0.186203	0.730013		AFUN001595	128.606	0.014083	0.902423	0.0156057	0.987549	0.00544137	0.999461	0.000233942		AFUN001595	116.865	-0.633601	0.499602	-1.26821	0.204722	0.688835	1	0
AFUN001596	4906769	4913988	7220	others	No	cDNA	sosie	others	Protein sosie [Source:UniProtKB/TrEMBL;Acc:A0A182R600]	sosie	No	AFUN001596	155.451	-1.53526	0.211661	-7.25339	4.06475e-13	12.391	9.62494e-12	11.0166	x	AFUN001596	137.861	-1.48915	0.771506	-1.93019	0.0535838	1.27097	0.451912	0.344946		AFUN001596	119.427	-0.217703	0.308145	-0.706495	0.47988	0.318867	1	0
AFUN001597	4914549	4917685	3137	others	No	cDNA	AFUN001597	others	serine/threonine-protein kinase greatwall [Source:Projected from Anopheles gambiae (AGAP001636) VB Community Annotation]	NA	No	AFUN001597	195.739	1.18148	0.27341	4.32128	1.55123e-05	4.80932	9.57833e-05	4.01871	x	AFUN001597	121.774	0.684595	0.816429	0.838523	0.401737	0.396058	0.912653	0.0396943		AFUN001597	183.337	0.403274	0.37126	1.08623	0.277377	0.556929	1	0
AFUN001598	4920205	4924524	4320	others	No	cDNA	AFUN001598	others	sodium-coupled monocarboxylate transporter [Source:Projected from Anopheles gambiae (AGAP001635) VB Community Annotation]	NA	No	AFUN001598	74.0502	-0.491021	0.279733	-1.75532	0.0792046	1.10125	0.149518	0.825308		AFUN001598	55.0514	-0.980255	0.984701	-0.995485	0.319501	0.495528	0.874187	0.0583955		AFUN001598	60.9601	0.289703	0.380331	0.761711	0.446232	0.350439	1	0
AFUN001599	4932741	4939512	6772	others	No	cDNA	AFUN001599	others	unspecified product	NA	No	AFUN001599	247.049	0.0246567	0.401279	0.0614454	0.951004	0.0218174	0.967927	0.0141576		AFUN001599	243.074	-0.162043	0.816191	-0.198536	0.842626	0.0743654	0.985497	0.0063449		AFUN001599	227.054	-0.291646	0.536985	-0.543118	0.587049	0.231326	1	0
AFUN001600	4945364	4981279	35916	others	No	cDNA	AFUN001600	others	unspecified product	NA	No	AFUN001600	18558.5	-0.108415	0.163101	-0.664712	0.506235	0.295648	0.622754	0.205683		AFUN001600	16642.6	-0.082461	0.535177	-0.154082	0.877545	0.0567305	0.988728	0.00492302		AFUN001600	17052.9	-0.229053	0.179382	-1.2769	0.201638	0.695428	1	0
AFUN001601	5002059	5103933	101875	others	No	cDNA	AFUN001601	others	FERM domain-containing protein [Source:UniProtKB/TrEMBL;Acc:A0A182R605]	NA	No	AFUN001601	271.812	0.279256	0.253099	1.10335	0.269877	0.568835	0.391636	0.407118		AFUN001601	193.911	0.238741	0.688449	0.346781	0.728756	0.137418	0.984947	0.00658717		AFUN001601	251.007	0.125257	0.304106	0.411887	0.680422	0.167221	1	0
AFUN001602	5107813	5112559	4747	others	No	cDNA	AFUN001602	others	amiloride-sensitive sodium channel, other [Source:Projected from Anopheles gambiae (AGAP001631) VB Community Annotation]	NA	No	AFUN001602	1.65247	-1.32361	1.72895	-0.765559	0.443938	0.352677	0.567109	0.246333		AFUN001602	0	NA	NA	NA	NA	#VALUE!	1	0		AFUN001602	1.35707	1.9825	2.4397	0.812599	0.416448	0.380439	1	0
AFUN001603	5113113	5114236	1124	others	No	cDNA	AFUN001603	others	unspecified product	NA	No	AFUN001603	9.82769	-5.27039	1.02227	-5.15558	2.52842e-07	6.59715	2.35206e-06	5.62855	x	AFUN001603	11.1743	-5.85144	2.35027	-2.48969	0.0127854	1.89328	0.178147	0.749222		AFUN001603	4.31312	-0.0105959	1.98983	-0.00532505	0.995751	0.00184914	1	0
AFUN001604	5118905	5120152	1248	others	No	cDNA	Tpi	others	triosephosphate isomerase	Tpi	No	AFUN001604	938.366	0.417015	0.404159	1.03181	0.302161	0.519761	0.426061	0.370529		AFUN001604	830.972	-0.133663	0.582136	-0.229608	0.818396	0.0870365	0.985365	0.00640266		AFUN001604	856.331	-0.0297546	0.42767	-0.0695739	0.944533	0.024783	1	0
AFUN001605	5120128	5121289	1162	others	No	cDNA	AFUN001605	others	unspecified product	NA	No	AFUN001605	143.076	-0.662948	0.263499	-2.51594	0.0118716	1.92549	0.0313118	1.50429	x	AFUN001605	119.858	-0.185788	0.761896	-0.243849	0.807348	0.0929395	0.985365	0.00640266		AFUN001605	129.127	-0.31292	0.315224	-0.99269	0.320861	0.493683	1	0
AFUN001607	5126380	5136407	10028	others	No	cDNA	AFUN001607	others	solute carrier family 7 (cationic amino acid transporter, y+ system) [Source:Projected from Anopheles gambiae (AGAP001627) VB Community Annotation]	NA	No	AFUN001607	2444.16	0.501662	0.264058	1.89982	0.0574573	1.24065	0.115122	0.938841		AFUN001607	2365.71	0.951732	0.742948	1.28102	0.200186	0.698565	0.775981	0.110149		AFUN001607	2501.34	-0.433945	0.457752	-0.947992	0.343133	0.464537	1	0
AFUN001608	5139688	5153023	13336	others	No	cDNA	AFUN001608	others	unspecified product	NA	No	AFUN001608	8.11151	-0.123398	0.594923	-0.207418	0.835683	0.0779582	0.888486	0.0513493		AFUN001608	7.78109	-0.066199	2.19357	-0.0301787	0.975925	0.0105838	0.997339	0.00115709		AFUN001608	7.53907	-0.280044	0.789938	-0.354514	0.722954	0.140889	1	0
AFUN001609	5151063	5151999	937	others	No	cDNA	AFUN001609	others	unspecified product	NA	No	AFUN001609	1.95315	-1.06727	1.72125	-0.620054	0.535222	0.271466	0.647308	0.188889		AFUN001609	0.965348	-3.75084	5.81542	-0.644981	0.518939	0.284884	1	0		AFUN001609	1.26037	2.3551	3.01867	0.780177	0.435287	0.361225	1	0
AFUN001610	5162701	5166387	3687	others	No	cDNA	AFUN001610	others	unspecified product	NA	No	AFUN001610	425.572	-0.506666	0.217548	-2.32899	0.0198598	1.70203	0.0482892	1.31615	x	AFUN001610	369.228	-0.580987	0.669546	-0.867733	0.38554	0.41393	0.901945	0.0448199		AFUN001610	368.331	-0.137452	0.305882	-0.449365	0.653169	0.184975	1	0
AFUN001611	5167248	5171325	4078	others	No	cDNA	AFUN001611	others	unspecified product	NA	No	AFUN001611	33.429	0.392827	0.391406	1.00363	0.315557	0.500923	0.440238	0.356312		AFUN001611	29.3813	0.554186	1.23297	0.449471	0.653092	0.185026	0.977086	0.0100671		AFUN001611	32.5683	-0.250424	0.476828	-0.525188	0.599453	0.222245	1	0
AFUN001612	5171837	5173940	2104	others	No	cDNA	AFUN001612	others	myosin light chain [Source:Projected from Anopheles gambiae (AGAP001622) VB Community Annotation]	NA	No	AFUN001612	4238.82	-0.609383	0.180902	-3.36859	0.000755551	3.12174	0.00293907	2.53179	x	AFUN001612	3854.48	-0.788149	0.549628	-1.43397	0.151581	0.819354	0.710768	0.148272		AFUN001612	3579.47	-0.159738	0.181068	-0.882198	0.37767	0.422888	1	0
AFUN001613	5177077	5179242	2166	others	No	cDNA	AFUN001613	others	Pyridoxal phosphate homeostasis protein [Source:UniProtKB/TrEMBL;Acc:A0A182R617]	NA	No	AFUN001613	448.023	-0.642457	0.272572	-2.35702	0.0184223	1.73466	0.0451741	1.34511	x	AFUN001613	352.192	-0.579726	0.620839	-0.933778	0.350419	0.455413	0.884113	0.0534923		AFUN001613	385.831	-0.0560333	0.324491	-0.172681	0.862902	0.0640384	1	0
AFUN001614	5179593	5180526	934	others	No	cDNA	AFUN001614	others	unspecified product	NA	No	AFUN001614	0.187841	-1.4756	3.47895	-0.42415	0.671457	0.172982	1	0		AFUN001614	0.241337	-1.75094	5.94809	-0.294371	0.768474	0.114371	1	0		AFUN001614	0.0683209	0	4.08048	0	1	0	1	0
AFUN001621	5328009	5330238	2230	others	No	cDNA	AFUN001621	others	SWIM-type domain-containing protein [Source:UniProtKB/TrEMBL;Acc:A0A182R625]	NA	No	AFUN001621	103.67	0.132703	0.282732	0.46936	0.638813	0.194626	0.736244	0.132978		AFUN001621	60.2063	0.195687	0.959453	0.203957	0.838387	0.0765552	0.985374	0.00639911		AFUN001621	93.4524	0.372373	0.347997	1.07005	0.284598	0.545768	1	0
AFUN001622	5330567	5333102	2536	others	No	cDNA	AFUN001622	others	unspecified product	NA	No	AFUN001622	1022.81	0.131282	0.145252	0.903826	0.366088	0.436415	0.490127	0.309691		AFUN001622	745.536	0.2158	0.587568	0.367276	0.713413	0.146659	0.983533	0.00721112		AFUN001622	944.973	0.0506894	0.189896	0.266933	0.789521	0.102636	1	0
AFUN001624	5347705	5367659	19955	others	No	cDNA	AFUN001624	others	E3 ubiquitin-protein ligase MYLIP [Source:Projected from Anopheles gambiae (AGAP001609) VB Community Annotation]	NA	No	AFUN001624	1342.86	0.124797	0.161097	0.774674	0.438532	0.357998	0.562267	0.250057		AFUN001624	1043.52	0.252894	0.562594	0.449513	0.653061	0.185046	0.977086	0.0100671		AFUN001624	1253.86	-0.0523683	0.19043	-0.275	0.783316	0.106063	1	0
AFUN001630	5492070	5493559	1490	others	No	cDNA	AFUN001630	others	mitochondrial 18 kDa protein [Source:Projected from Anopheles gambiae (AGAP001603) VB Community Annotation]	NA	No	AFUN001630	300.434	-1.25768	0.145111	-8.66701	4.4363e-18	17.353	2.02216e-16	15.6942	x	AFUN001630	212.744	-1.51178	0.673217	-2.24561	0.0247289	1.6068	0.276634	0.558095		AFUN001630	233.284	0.26856	0.198898	1.35024	0.176938	0.752178	1	0
AFUN001631	5493557	5496099	2543	others	No	cDNA	AFUN001631	others	amiloride-sensitive sodium channel, other [Source:Projected from Anopheles gambiae (AGAP001602) VB Community Annotation]	NA	No	AFUN001631	10.886	-0.374688	0.533577	-0.702218	0.482543	0.316464	0.601553	0.220726		AFUN001631	9.27778	-0.200689	1.98979	-0.100859	0.919662	0.0363717	0.992592	0.00322905		AFUN001631	9.83338	-0.197358	0.69421	-0.284292	0.776187	0.110034	1	0
AFUN001632	5501554	5503411	1858	others	No	cDNA	AFUN001632	others	Ser/Thr protein phosphatase/nucleotidase [Source:Projected from Anopheles gambiae (AGAP001601) VB Community Annotation]	NA	No	AFUN001632	262.487	-1.61288	0.363159	-4.44125	8.94376e-06	5.04848	5.87187e-05	4.23122	x	AFUN001632	277.189	-1.18976	0.781465	-1.52248	0.127889	0.893167	0.675429	0.17042		AFUN001632	208.712	-0.698344	0.509016	-1.37195	0.170079	0.769348	1	0
AFUN001633	5503976	5506252	2277	others	No	cDNA	AFUN001633	others	Ser/Thr protein phosphatase/nucleotidase [Source:Projected from Anopheles gambiae (AGAP001600) VB Community Annotation]	NA	No	AFUN001633	132.94	-1.65082	0.521879	-3.16322	0.00156034	2.80678	0.00550279	2.25942	x	AFUN001633	132.902	-1.49425	1.03064	-1.44982	0.147109	0.832361	0.706074	0.15115		AFUN001633	100.887	-0.47149	0.77059	-0.611856	0.540633	0.267097	1	0
AFUN001634	5507737	5573406	65670	others	No	cDNA	AFUN001634	others	unspecified product	NA	No	AFUN001634	218.51	0.371131	0.267447	1.38768	0.165234	0.7819	0.267965	0.571922		AFUN001634	194.018	0.801472	0.71067	1.12777	0.259418	0.586001	0.829848	0.0810013		AFUN001634	217.618	-0.308722	0.334835	-0.922012	0.356522	0.447913	1	0
AFUN001635	5575709	5576530	822	others	No	cDNA	AFUN001635	others	unspecified product	NA	No	AFUN001635	0.430974	-1.62899	3.04714	-0.534598	0.592928	0.226998	1	0		AFUN001635	0.796779	-1.39224	5.84685	-0.238118	0.81179	0.0905564	1	0		AFUN001635	0.293361	-1.35117	4.0615	-0.332679	0.739377	0.131134	1	0
AFUN001636	5579870	5582129	2260	others	No	cDNA	AFUN001636	others	N-acetyltransferase domain-containing protein [Source:UniProtKB/TrEMBL;Acc:A0A182R640]	NA	No	AFUN001636	50.2674	0.669789	0.788286	0.849678	0.395504	0.402849	0.520126	0.283892		AFUN001636	103.084	1.43092	0.864819	1.65459	0.0980077	1.00874	0.612531	0.212872		AFUN001636	66.4022	-1.56241	0.856449	-1.82429	0.0681076	1.1668	1	0
AFUN001637	5582551	5583831	1281	others	No	cDNA	AFUN001637	others	homeobox protein goosecoid [Source:Projected from Anopheles gambiae (AGAP001593) VB Community Annotation]	NA	No	AFUN001637	4.04035	0.1612	0.950492	0.169596	0.865328	0.0628193	0.910162	0.0408814		AFUN001637	3.50122	-1.26027	3.41766	-0.368751	0.712313	0.147329	0.983533	0.00721112		AFUN001637	3.18765	0.322141	1.2948	0.248796	0.803519	0.0950041	1	0
AFUN001640	5610316	5622361	12046	others	No	cDNA	AFUN001640	others	unspecified product	NA	No	AFUN001640	23.8917	-0.724058	0.37903	-1.91029	0.0560959	1.25107	0.112873	0.947411		AFUN001640	17.0482	-1.80127	1.54554	-1.16546	0.243831	0.612911	0.820165	0.0860986		AFUN001640	17.949	0.665689	0.551467	1.20712	0.227384	0.643239	1	0
AFUN001641	5626786	5633669	6884	others	No	cDNA	AFUN001641	others	DBB domain-containing protein [Source:UniProtKB/TrEMBL;Acc:A0A182R645]	NA	No	AFUN001641	221.971	-0.116821	0.204225	-0.572021	0.567308	0.246181	0.674856	0.170789		AFUN001641	156.135	-0.015291	0.722708	-0.0211579	0.98312	0.00739361	0.998186	0.000788662		AFUN001641	200.432	0.101742	0.250941	0.405443	0.685152	0.164213	1	0
AFUN001642	5635115	5636688	1574	others	No	cDNA	AFUN001642	others	Methylthioribose-1-phosphate isomerase [Source:Projected from Anopheles gambiae (AGAP001589) UniProtKB/Swiss-Prot;Acc:Q7PKS9]	NA	No	AFUN001642	108.538	-0.0997602	0.232932	-0.42828	0.668447	0.174933	0.76146	0.118353		AFUN001642	100.127	0.0503488	0.802375	0.0627497	0.949966	0.022292	0.99461	0.00234729		AFUN001642	101.52	-0.305655	0.282447	-1.08217	0.279178	0.554119	1	0
AFUN001644	5647406	5649687	2282	others	No	cDNA	AFUN001644	others	CUE domain-containing protein [Source:Projected from Anopheles gambiae (AGAP001586) VB Community Annotation]	NA	No	AFUN001644	158.189	0.0801148	0.218241	0.367093	0.71355	0.146576	0.796557	0.0987833		AFUN001644	123.277	-0.0376459	0.773885	-0.0486453	0.961202	0.0171854	0.995906	0.00178163		AFUN001644	144	0.0311788	0.28759	0.108414	0.913667	0.039212	1	0
AFUN001645	5649908	5652589	2682	others	No	cDNA	AFUN001645	others	deoxynucleoside kinase [Source:Projected from Anopheles gambiae (AGAP001585) VB Community Annotation]	NA	No	AFUN001645	195.679	-0.472188	0.156561	-3.01601	0.00256127	2.59154	0.00849299	2.07094	x	AFUN001645	158.795	-0.679942	0.730747	-0.930475	0.352125	0.453303	0.884113	0.0534923		AFUN001645	166.754	-0.00316956	0.215619	-0.0146998	0.988272	0.00512365	1	0
AFUN001646	5652901	5653556	656	others	No	cDNA	snRNP-U1-C	others	U1 small nuclear ribonucleoprotein C [Source:UniProtKB/TrEMBL;Acc:A0A182R650]	snRNP-U1-C	No	AFUN001646	123.431	0.441814	0.201466	2.193	0.0283074	1.5481	0.0644927	1.19049		AFUN001646	94.3162	0.250189	0.87984	0.284357	0.776137	0.110062	0.985365	0.00640266		AFUN001646	114.919	0.0490241	0.331357	0.14795	0.882382	0.0543431	1	0
AFUN001647	5653758	5666734	12977	others	No	cDNA	AFUN001647	others	Wiskott-Aldrich syndrome protein family member [Source:UniProtKB/TrEMBL;Acc:A0A182R651]	NA	No	AFUN001647	837.04	0.665084	0.146052	4.55374	5.27008e-06	5.27818	3.62794e-05	4.44034	x	AFUN001647	640.976	0.874867	0.581738	1.50388	0.132611	0.877419	0.684371	0.164708		AFUN001647	817.326	-0.0397754	0.16314	-0.243812	0.807376	0.092924	1	0
AFUN001649	5696532	5717410	20879	others	No	cDNA	AFUN001649	others	unspecified product	NA	No	AFUN001649	1620.82	0.0191495	0.186044	0.10293	0.918019	0.0371485	0.946572	0.0238462		AFUN001649	1239.67	-0.384586	0.564877	-0.680831	0.495979	0.304537	0.941598	0.0261347		AFUN001649	1422.91	0.154881	0.208692	0.74215	0.457996	0.339138	1	0
AFUN001652	5760517	5763233	2717	others	No	cDNA	AFUN001652	others	Ras-related C3 botulinum toxin substrate [Source:Projected from Anopheles gambiae (AGAP001573) VB Community Annotation]	NA	No	AFUN001652	638.087	-0.348842	0.16989	-2.05334	0.0400392	1.39751	0.0857577	1.06673		AFUN001652	420.081	-0.559146	0.653748	-0.855293	0.392389	0.406283	0.906411	0.042675		AFUN001652	546.172	0.306785	0.264389	1.16036	0.245904	0.609234	1	0
[truncated: 13,115 more rows]
